# Supplementary material for: ProteasomeID: quantitative mapping of proteasome interactomes and substrates for in vitro and in vivo studies
Source: bioRxiv preprint, doi:10.1101/2022.08.09.503299, version 3 (2024-03-01)
Supplement: Supplemental Table 1 [file 503299_file02.xlsx]

## Sheet: Column Key
Tab	Column Header	Meaning
1-3	logFC	log2 (fold change) transformed ratios of averaged replicates
1-3	P.value	P value from unpaired, two-sided Student’s t test moderated by the empirical Bayes method
1-3	Q.value	P value adjusted for multiple testing using the Benjamini-Hochberg method
1-3	ID	UniProt ID
1-3	Gene	Gene name
1-3	Description	Description of the protein
1-3	Short.name	Short name of the protein
1-3	Unique.peptides	Number of unique peptides used to identify the protein
1-2	Cellular.component	Subcellular location of the protein
1-2	Molecular.function	Molecular function of the protein
1-2	Biological.process	Biological process that the protein is involved in

## Sheet: 1_ PSMA4-BirA vs BirA-Ctr
# Output candidates table from Spectronaut for comparison of PSMA4-BirA* vs. BirA*-Ctr cell lines.
logFC	P.value	Q.value	ID	Gene	Description	Short.name	Unique.peptides	Cellular.component	Molecular.function	Biological.process
8.88043	0.00341871	0.00199559	Q8TE73	DNAH5	Dynein heavy chain 5, axonemal	DYH5_HUMAN	1	microtubule,axoneme,outer dynein arm	ATP binding,ATP-dependent microtubule motor activity, minus-end-directed,dynein light chain binding,dynein intermediate chain binding,dynein light intermediate chain binding	cilium movement,determination of left/right symmetry,flagellated sperm motility,outer dynein arm assembly,cilium morphogenesis
7.92083	1.56292e-09	2.51509e-09	P28072	PSMB6	Proteasome subunit beta type-6	PSB6_HUMAN	7	proteasome complex,nucleus,nucleoplasm,cytosol,proteasome core complex,proteasome core complex, beta-subunit complex,extracellular exosome	endopeptidase activity,threonine-type endopeptidase activity,cadherin binding	MAPK cascade,protein polyubiquitination,stimulatory C-type lectin receptor signaling pathway,antigen processing and presentation of exogenous peptide antigen via MHC class I, TAP-dependent,regulation of cellular amino acid metabolic process,negative regulation of G2/M transition of mitotic cell cycle,viral process,protein deubiquitination,anaphase-promoting complex-dependent catabolic process,SCF…
7.72499	1.65003e-32	1.57925e-31	P25789	PSMA4	Proteasome subunit alpha type-4	PSA4_HUMAN	11	proteasome complex,cytoplasmic mRNA processing body,nucleus,nucleoplasm,cytosol,proteasome core complex,proteasome core complex, alpha-subunit complex,intracellular membrane-bounded organelle,extracellular exosome	threonine-type endopeptidase activity,protein binding	MAPK cascade,protein polyubiquitination,stimulatory C-type lectin receptor signaling pathway,antigen processing and presentation of exogenous peptide antigen via MHC class I, TAP-dependent,regulation of cellular amino acid metabolic process,negative regulation of G2/M transition of mitotic cell cycle,viral process,protein deubiquitination,anaphase-promoting complex-dependent catabolic process,SCF…
7.03594	0.113361	0.0420326	O75923	DYSF	Dysferlin	DYSF_HUMAN	1	endosome,early endosome,late endosome,microtubule organizing center,plasma membrane,integral component of membrane,lamellipodium,endocytic vesicle,T-tubule,cytoplasmic vesicle membrane,sarcolemma,extracellular exosome	calcium ion binding,protein binding,phospholipid binding,calcium-dependent phospholipid binding	plasma membrane repair,vesicle fusion,muscle contraction
6.94603	1.02332e-28	7.91835e-28	P28066	PSMA5	Proteasome subunit alpha type-5	PSA5_HUMAN	13	proteasome complex,extracellular region,nucleus,nucleoplasm,cytosol,proteasome core complex,proteasome core complex, alpha-subunit complex,secretory granule lumen,extracellular exosome,ficolin-1-rich granule lumen	threonine-type endopeptidase activity,protein binding	MAPK cascade,protein polyubiquitination,stimulatory C-type lectin receptor signaling pathway,antigen processing and presentation of exogenous peptide antigen via MHC class I, TAP-dependent,regulation of cellular amino acid metabolic process,negative regulation of G2/M transition of mitotic cell cycle,protein deubiquitination,anaphase-promoting complex-dependent catabolic process,SCF-dependent pro…
6.8686	2.29639e-32	2.17515e-31	P25786	PSMA1	Proteasome subunit alpha type-1	PSA1_HUMAN	18	proteasome complex,nucleus,nucleoplasm,centrosome,cytosol,proteasome core complex,polysome,proteasome core complex, alpha-subunit complex,extracellular exosome	RNA binding,threonine-type endopeptidase activity,protein binding	MAPK cascade,protein polyubiquitination,stimulatory C-type lectin receptor signaling pathway,antigen processing and presentation of exogenous peptide antigen via MHC class I, TAP-dependent,regulation of cellular amino acid metabolic process,negative regulation of G2/M transition of mitotic cell cycle,protein deubiquitination,anaphase-promoting complex-dependent catabolic process,SCF-dependent pro…
6.46446	6.46119e-30	5.42627e-29	P25787	PSMA2	Proteasome subunit alpha type-2	PSA2_HUMAN	13	proteasome complex,cytoplasmic mRNA processing body,extracellular region,nucleus,nucleoplasm,cytosol,proteasome core complex,proteasome core complex, alpha-subunit complex,secretory granule lumen,extracellular exosome,ficolin-1-rich granule lumen	threonine-type endopeptidase activity,protein binding	MAPK cascade,protein polyubiquitination,stimulatory C-type lectin receptor signaling pathway,antigen processing and presentation of exogenous peptide antigen via MHC class I, TAP-dependent,regulation of cellular amino acid metabolic process,response to virus,negative regulation of G2/M transition of mitotic cell cycle,protein deubiquitination,anaphase-promoting complex-dependent catabolic process…
6.31626	1.00177e-26	6.70995e-26	P25788	PSMA3	Proteasome subunit alpha type-3	PSA3_HUMAN	14	proteasome complex,nucleus,nucleoplasm,cytoplasm,cytosol,proteasome core complex,proteasome core complex, alpha-subunit complex,synapse,extracellular exosome	threonine-type endopeptidase activity,protein binding	MAPK cascade,protein polyubiquitination,stimulatory C-type lectin receptor signaling pathway,antigen processing and presentation of exogenous peptide antigen via MHC class I, TAP-dependent,regulation of cellular amino acid metabolic process,negative regulation of G2/M transition of mitotic cell cycle,viral process,protein deubiquitination,anaphase-promoting complex-dependent catabolic process,SCF…
6.27685	9.23048e-26	5.86533e-25	P60900	PSMA6	Proteasome subunit alpha type-6	PSA6_HUMAN	15	proteasome complex,cytoplasmic mRNA processing body,nucleus,nucleoplasm,cytosol,proteasome core complex,polysome,nuclear matrix,proteasome core complex, alpha-subunit complex,myofibril,sarcomere,extracellular exosome	RNA binding,endopeptidase activity,threonine-type endopeptidase activity,protein binding,purine ribonucleoside triphosphate binding,NF-kappaB binding	MAPK cascade,protein polyubiquitination,stimulatory C-type lectin receptor signaling pathway,antigen processing and presentation of exogenous peptide antigen via MHC class I, TAP-dependent,regulation of cellular amino acid metabolic process,negative regulation of G2/M transition of mitotic cell cycle,protein deubiquitination,anaphase-promoting complex-dependent catabolic process,SCF-dependent pro…
6.2303	6.4725e-41	8.7779e-40	P20618	PSMB1	Proteasome subunit beta type-1	PSB1_HUMAN	14	proteasome complex,extracellular region,nucleus,nucleoplasm,cytosol,proteasome core complex,proteasome core complex, beta-subunit complex,secretory granule lumen,extracellular exosome,ficolin-1-rich granule lumen	threonine-type endopeptidase activity,protein binding	MAPK cascade,protein polyubiquitination,stimulatory C-type lectin receptor signaling pathway,antigen processing and presentation of exogenous peptide antigen via MHC class I, TAP-dependent,regulation of cellular amino acid metabolic process,negative regulation of G2/M transition of mitotic cell cycle,viral process,protein deubiquitination,anaphase-promoting complex-dependent catabolic process,SCF…
6.03349	7.52771e-11	1.41486e-10	Q969U7	PSMG2	Proteasome assembly chaperone 2	PSMG2_HUMAN	7	proteasome complex,nucleus,cytosol	protein binding	mitotic spindle assembly checkpoint,negative regulation of apoptotic process,proteasome assembly
6.03042	1.91374e-33	1.93288e-32	O14818	PSMA7	Proteasome subunit alpha type-7	PSA7_HUMAN	19	proteasome complex,nucleus,nucleoplasm,cytosol,proteasome core complex,proteasome core complex, alpha-subunit complex,extracellular exosome,postsynapse	threonine-type endopeptidase activity,protein binding,identical protein binding	MAPK cascade,protein polyubiquitination,stimulatory C-type lectin receptor signaling pathway,antigen processing and presentation of exogenous peptide antigen via MHC class I, TAP-dependent,regulation of cellular amino acid metabolic process,negative regulation of G2/M transition of mitotic cell cycle,viral process,protein deubiquitination,anaphase-promoting complex-dependent catabolic process,SCF…
6.01455	1.3644e-42	2.06164e-41	Q99436	PSMB7	Proteasome subunit beta type-7	PSB7_HUMAN	13	proteasome complex,extracellular region,nucleus,nucleoplasm,cytosol,proteasome core complex,proteasome core complex, beta-subunit complex,secretory granule lumen,extracellular exosome,ficolin-1-rich granule lumen	threonine-type endopeptidase activity,protein binding	MAPK cascade,protein polyubiquitination,stimulatory C-type lectin receptor signaling pathway,antigen processing and presentation of exogenous peptide antigen via MHC class I, TAP-dependent,regulation of cellular amino acid metabolic process,negative regulation of G2/M transition of mitotic cell cycle,viral process,protein deubiquitination,anaphase-promoting complex-dependent catabolic process,SCF…
5.70615	1.00006e-24	5.96928e-24	P28074	PSMB5	Proteasome subunit beta type-5	PSB5_HUMAN	16	proteasome complex,nucleus,nucleoplasm,centrosome,cytosol,proteasome core complex,proteasome core complex, beta-subunit complex,extracellular exosome	threonine-type endopeptidase activity,protein binding,peptidase activity	MAPK cascade,protein polyubiquitination,stimulatory C-type lectin receptor signaling pathway,antigen processing and presentation of exogenous peptide antigen via MHC class I, TAP-dependent,proteolysis,regulation of cellular amino acid metabolic process,response to oxidative stress,negative regulation of G2/M transition of mitotic cell cycle,viral process,protein deubiquitination,anaphase-promotin…
5.52607	2.2988e-17	8.14662e-17	P28070	PSMB4	Proteasome subunit beta type-4	PSB4_HUMAN	9	proteasome complex,nucleus,nucleoplasm,cytosol,proteasome core complex,proteasome core complex, beta-subunit complex,extracellular exosome	lipopolysaccharide binding,threonine-type endopeptidase activity,protein binding	MAPK cascade,protein polyubiquitination,stimulatory C-type lectin receptor signaling pathway,antigen processing and presentation of exogenous peptide antigen via MHC class I, TAP-dependent,negative regulation of inflammatory response to antigenic stimulus,regulation of cellular amino acid metabolic process,negative regulation of G2/M transition of mitotic cell cycle,viral process,protein deubiqui…
5.26764	1.68331e-23	9.24254e-23	P49721	PSMB2	Proteasome subunit beta type-2	PSB2_HUMAN	17	proteasome complex,nucleus,nucleoplasm,cytosol,proteasome core complex,membrane,proteasome core complex, beta-subunit complex,extracellular exosome	threonine-type endopeptidase activity,protein binding	MAPK cascade,protein polyubiquitination,stimulatory C-type lectin receptor signaling pathway,antigen processing and presentation of exogenous peptide antigen via MHC class I, TAP-dependent,regulation of cellular amino acid metabolic process,response to organonitrogen compound,negative regulation of G2/M transition of mitotic cell cycle,response to organic cyclic compound,viral process,protein deu…
5.26074	0.00582662	0.00320518	O00370	NaN	LINE-1 retrotransposable element ORF2 protein	LORF2_HUMAN	1		RNA-directed DNA polymerase activity,Type II site-specific deoxyribonuclease activity,metal ion binding	DNA recombination,transposition, RNA-mediated,reverse transcription involved in RNA-mediated transposition,nucleic acid phosphodiester bond hydrolysis
5.26029	5.71673e-06	5.71524e-06	Q8WXE1	ATRIP	ATR-interacting protein	ATRIP_HUMAN	1	nucleus,nucleoplasm	protein binding,K63-linked polyubiquitin binding	DNA damage checkpoint,DNA replication,interstrand cross-link repair,regulation of signal transduction by p53 class mediator
5.14624	1.76108e-20	7.9518e-20	P49720	PSMB3	Proteasome subunit beta type-3	PSB3_HUMAN	14	proteasome complex,nucleus,nucleoplasm,cytosol,proteasome core complex,proteasome core complex, beta-subunit complex,extracellular exosome	threonine-type endopeptidase activity,protein binding	MAPK cascade,protein polyubiquitination,stimulatory C-type lectin receptor signaling pathway,antigen processing and presentation of exogenous peptide antigen via MHC class I, TAP-dependent,regulation of cellular amino acid metabolic process,negative regulation of G2/M transition of mitotic cell cycle,viral process,protein deubiquitination,anaphase-promoting complex-dependent catabolic process,SCF…
4.49505	0.00383921	0.00221477	Q8NDZ2	SIMC1	SUMO-interacting motif-containing protein 1	SIMC1_HUMAN	2		SUMO polymer binding
4.44973	0.00801935	0.00425173	Q96SI1	KCTD15	BTB/POZ domain-containing protein KCTD15	KCD15_HUMAN	2		protein binding,identical protein binding	multicellular organism development,protein homooligomerization
4.2855	0.00832782	0.00439524	O76075	DFFB	DNA fragmentation factor subunit beta	DFFB_HUMAN	1	nuclear chromatin,nucleus,nucleoplasm,nucleolus,cytosol	deoxyribonuclease activity,protein binding,enzyme binding,protein domain specific binding,identical protein binding,disordered domain specific binding	DNA catabolic process,apoptotic DNA fragmentation,apoptotic chromosome condensation,protein homooligomerization
4.26612	6.16539e-17	2.10336e-16	O95456	PSMG1	Proteasome assembly chaperone 1	PSMG1_HUMAN	9	nucleus,nucleoplasm,cytoplasm,endoplasmic reticulum,Golgi apparatus,cytosol	protein binding,proteasome binding	cerebellar granule cell precursor proliferation,proteasome assembly,proteasome core complex assembly
4.25205	0.00414366	0.00236904	Q6NSW5	FAM45B	Protein FAM45B	FA45B_HUMAN	3
4.24809	1.03719e-41	1.46891e-40	P61289	PSME3	Proteasome activator complex subunit 3	PSME3_HUMAN	17	proteasome complex,nucleus,nucleoplasm,cytoplasm,cytosol,proteasome activator complex,membrane	p53 binding,protein binding,identical protein binding,endopeptidase activator activity,MDM2/MDM4 family protein binding	MAPK cascade,protein polyubiquitination,stimulatory C-type lectin receptor signaling pathway,antigen processing and presentation of exogenous peptide antigen via MHC class I, TAP-dependent,regulation of cellular amino acid metabolic process,apoptotic process,positive regulation of endopeptidase activity,negative regulation of G2/M transition of mitotic cell cycle,protein deubiquitination,anaphase…
4.22359	0.00545196	0.00302074	O43639	NCK2	Cytoplasmic protein NCK2	NCK2_HUMAN	2	cytoplasm,endoplasmic reticulum,cytosol,vesicle membrane,postsynaptic density	phosphotyrosine binding,SH3/SH2 adaptor activity,protein binding,cytoskeletal adaptor activity,receptor signaling complex scaffold activity,protein complex binding,scaffold protein binding	immunological synapse formation,actin filament organization,signal transduction,signal complex assembly,epidermal growth factor receptor signaling pathway,regulation of epidermal growth factor-activated receptor activity,negative regulation of cell proliferation,cell migration,lamellipodium assembly,positive regulation of actin filament polymerization,negative regulation of peptidyl-serine phosph…
4.06164	0.000227082	0.000173268	Q6ZN54	DEF8	Differentially expressed in FDCP 8 homolog	DEFI8_HUMAN	1	intracellular	metal ion binding	lysosome localization,intracellular signal transduction,positive regulation of bone resorption,positive regulation of ruffle assembly
3.98714	9.05794e-06	8.75898e-06	Q9GZU8	FAM192A	Protein FAM192A	F192A_HUMAN	6	nucleus	protein binding
3.97692	6.27973e-59	1.82588e-57	O43242	PSMD3	26S proteasome non-ATPase regulatory subunit 3	PSMD3_HUMAN	39	proteasome complex,extracellular region,nucleus,nucleoplasm,cytosol,proteasome regulatory particle, lid subcomplex,membrane,proteasome accessory complex,secretory granule lumen,extracellular exosome,ficolin-1-rich granule lumen	protein binding,enzyme regulator activity	MAPK cascade,protein polyubiquitination,stimulatory C-type lectin receptor signaling pathway,antigen processing and presentation of exogenous peptide antigen via MHC class I, TAP-dependent,ubiquitin-dependent protein catabolic process,regulation of cellular amino acid metabolic process,negative regulation of G2/M transition of mitotic cell cycle,protein deubiquitination,anaphase-promoting complex…
3.90893	3.40888e-44	5.61514e-43	P62333	PSMC6	26S protease regulatory subunit 10B	PRS10_HUMAN	19	proteasome complex,nucleus,nucleoplasm,cytosol,proteasome regulatory particle, base subcomplex,membrane,proteasome accessory complex,nuclear proteasome complex,cytosolic proteasome complex,extracellular exosome	protein binding,ATP binding,ATPase activity,TBP-class protein binding,protein binding, bridging,proteasome-activating ATPase activity,identical protein binding	MAPK cascade,protein polyubiquitination,stimulatory C-type lectin receptor signaling pathway,antigen processing and presentation of exogenous peptide antigen via MHC class I, TAP-dependent,ubiquitin-dependent protein catabolic process,regulation of cellular amino acid metabolic process,negative regulation of G2/M transition of mitotic cell cycle,protein deubiquitination,ER-associated ubiquitin-de…
3.90388	0.0856294	0.0331764	O43149	ZZEF1	Zinc finger ZZ-type and EF-hand domain-containing protein 1	ZZEF1_HUMAN	2		calcium ion binding,zinc ion binding
3.8713	0.188286	0.0649214	Q5VYV7	SLX4IP	Protein SLX4IP	SLX4I_HUMAN	1		protein binding
3.79188	0.262309	0.0858774	Q9Y297	BTRC	F-box/WD repeat-containing protein 1A	FBW1A_HUMAN	2	nucleoplasm,cytosol,SCF ubiquitin ligase complex	ubiquitin-protein transferase activity,protein binding,beta-catenin binding,ligase activity,protein phosphorylated amino acid binding,protein dimerization activity,ubiquitin protein ligase activity	G2/M transition of mitotic cell cycle,protein polyubiquitination,stimulatory C-type lectin receptor signaling pathway,protein dephosphorylation,ubiquitin-dependent protein catabolic process,signal transduction,viral process,Wnt signaling pathway,protein ubiquitination,SCF-dependent proteasomal ubiquitin-dependent protein catabolic process,protein destabilization,mammary gland epithelial cell prol…
3.53109	6.01549e-10	1.01752e-09	Q9Y244	POMP	Proteasome maturation protein	POMP_HUMAN	8	nucleus,cytoplasm,endoplasmic reticulum,cytosol,nuclear speck,organelle membrane	protein binding	proteasome assembly
3.39998	5.8035e-07	6.70696e-07	P51665	PSMD7	26S proteasome non-ATPase regulatory subunit 7	PSMD7_HUMAN	9	proteasome complex,extracellular region,nucleus,nucleoplasm,cytosol,proteasome regulatory particle,membrane,secretory granule lumen,extracellular exosome,ficolin-1-rich granule lumen	protein binding,protein homodimerization activity	MAPK cascade,protein polyubiquitination,stimulatory C-type lectin receptor signaling pathway,antigen processing and presentation of exogenous peptide antigen via MHC class I, TAP-dependent,regulation of cellular amino acid metabolic process,negative regulation of G2/M transition of mitotic cell cycle,protein deubiquitination,anaphase-promoting complex-dependent catabolic process,SCF-dependent pro…
3.38418	0.121054	0.044498	Q9BSB4	ATG101	Autophagy-related protein 101	ATGA1_HUMAN	1	pre-autophagosomal structure,endoplasmic reticulum membrane,cytosol	protein binding,protein complex binding,identical protein binding	autophagosome assembly,macroautophagy,regulation of macroautophagy
3.36846	0.0155525	0.0075894	Q02040	AKAP17A	A-kinase anchor protein 17A	AK17A_HUMAN	2	nucleus,spliceosomal complex,cytosol,nuclear speck	RNA binding,protein binding,protein kinase A binding	regulation of transcription, DNA-templated,mRNA processing,signal transduction,RNA splicing,B cell activation,regulation of RNA splicing
3.36604	0.296489	0.0951202	A2RUB6	CCDC66	Coiled-coil domain-containing protein 66	CCD66_HUMAN	2
3.30348	0.830939	0.222008	Q9BRZ2	TRIM56	E3 ubiquitin-protein ligase TRIM56	TRI56_HUMAN	2	cytoplasm,cytosol	RNA binding,ubiquitin-protein transferase activity,zinc ion binding	regulation of type I interferon production,interferon-beta production,response to type I interferon,defense response to virus,protein K63-linked ubiquitination
3.23824	3.79645e-60	1.12952e-58	Q9Y4E8	USP15	Ubiquitin carboxyl-terminal hydrolase 15	UBP15_HUMAN	37	nucleus,cytoplasm,mitochondrion,cytosol	cysteine-type endopeptidase activity,thiol-dependent ubiquitin-specific protease activity,transforming growth factor beta receptor binding,protein binding,thiol-dependent ubiquitinyl hydrolase activity,identical protein binding,SMAD binding,ubiquitinated histone binding	ubiquitin-dependent protein catabolic process,transforming growth factor beta receptor signaling pathway,protein deubiquitination,BMP signaling pathway,monoubiquitinated protein deubiquitination,histone H2B conserved C-terminal lysine deubiquitination,pathway-restricted SMAD protein phosphorylation
3.21197	1.34952e-08	1.93915e-08	Q9H9Q2	COPS7B	COP9 signalosome complex subunit 7b	CSN7B_HUMAN	7	nucleoplasm,cytosol,COP9 signalosome	protein binding	protein deneddylation,nucleotide-excision repair, DNA damage recognition,transcription-coupled nucleotide-excision repair,post-translational protein modification
3.21144	7.20156e-13	1.69672e-12	Q14997	PSME4	Proteasome activator complex subunit 4	PSME4_HUMAN	34	nucleus,nucleoplasm,cytosol,proteasome core complex,nuclear speck,spermatoproteasome complex	protein binding,peptidase activator activity,lysine-acetylated histone binding,proteasome binding	MAPK cascade,protein polyubiquitination,stimulatory C-type lectin receptor signaling pathway,antigen processing and presentation of exogenous peptide antigen via MHC class I, TAP-dependent,DNA repair,regulation of cellular amino acid metabolic process,cellular response to DNA damage stimulus,multicellular organism development,proteasomal ubiquitin-independent protein catabolic process,positive re…
3.17423	6.44038e-17	2.18939e-16	Q9UNS2	COPS3	COP9 signalosome complex subunit 3	CSN3_HUMAN	11	nucleus,nucleoplasm,cytoplasm,cytosol,COP9 signalosome	protein binding	protein deneddylation,nucleotide-excision repair, DNA damage recognition,in utero embryonic development,transcription-coupled nucleotide-excision repair,ubiquitin-dependent protein catabolic process,signal transduction,response to light stimulus,post-translational protein modification
3.15388	4.5577e-32	4.24574e-31	P61201	COPS2	COP9 signalosome complex subunit 2	CSN2_HUMAN	21	nucleoplasm,cytoplasm,cytosol,COP9 signalosome	transcription corepressor activity,signal transducer activity,protein binding	negative regulation of transcription from RNA polymerase II promoter,protein deneddylation,nucleotide-excision repair, DNA damage recognition,transcription-coupled nucleotide-excision repair,transcription from RNA polymerase II promoter,signal transduction,cell proliferation,neurogenesis,neuron differentiation,skeletal muscle cell differentiation,post-translational protein modification,negative r…
3.14571	0.0225392	0.0104576	Q9NWQ8	PAG1	Phosphoprotein associated with glycosphingolipid-enriched microdomains 1	PHAG1_HUMAN	1	intracellular,plasma membrane,integral component of plasma membrane,membrane raft	transmembrane receptor protein tyrosine kinase adaptor activity,SH3/SH2 adaptor activity,protein binding,SH2 domain binding	adaptive immune response,signal transduction,transmembrane receptor protein tyrosine kinase signaling pathway,epidermal growth factor receptor signaling pathway,positive regulation of signal transduction,intracellular signal transduction,T cell receptor signaling pathway,regulation of T cell activation,negative regulation of T cell activation
3.14386	0.350681	0.109477	Q96DP5	MTFMT	Methionyl-tRNA formyltransferase, mitochondrial	FMT_HUMAN	2	mitochondrion	methionyl-tRNA formyltransferase activity	translational initiation,conversion of methionyl-tRNA to N-formyl-methionyl-tRNA
3.10056	2.02993e-51	4.47752e-50	P35998	PSMC2	26S protease regulatory subunit 7	PRS7_HUMAN	45	proteasome complex,cytoplasmic mRNA processing body,extracellular region,nucleus,nucleoplasm,cytoplasm,cytosol,proteasome regulatory particle, base subcomplex,membrane,proteasome accessory complex,nuclear proteasome complex,cytosolic proteasome complex,secretory granule lumen,cytoplasmic ribonucleoprotein granule,ficolin-1-rich granule lumen	protein binding,ATP binding,ATPase activity,TBP-class protein binding,proteasome-activating ATPase activity	MAPK cascade,protein polyubiquitination,osteoblast differentiation,stimulatory C-type lectin receptor signaling pathway,antigen processing and presentation of exogenous peptide antigen via MHC class I, TAP-dependent,ubiquitin-dependent protein catabolic process,regulation of cellular amino acid metabolic process,negative regulation of G2/M transition of mitotic cell cycle,viral process,protein de…
3.03575	0.144413	0.0517999	Q969F1	GTF3C6	General transcription factor 3C polypeptide 6	TF3C6_HUMAN	1	transcription factor TFIIIC complex,nucleoplasm,nuclear body	protein binding,DNA binding	transcription, DNA-templated,transcription from RNA polymerase III promoter,5S class rRNA transcription from RNA polymerase III type 1 promoter,tRNA transcription from RNA polymerase III promoter
2.98766	1.42146e-06	1.56096e-06	Q9Y3I1	FBXO7	F-box only protein 7	FBX7_HUMAN	5	ubiquitin ligase complex,nucleus,cytoplasm,mitochondrion,cytosol,SCF ubiquitin ligase complex,protein complex,glial cytoplasmic inclusion,classical Lewy body,Lewy neurite,Lewy body core,Lewy body corona	ubiquitin-protein transferase activity,protein binding,protein kinase binding,ubiquitin protein ligase binding,ubiquitin binding,protein heterodimerization activity	protein polyubiquitination,mitophagy,ubiquitin-dependent protein catabolic process,protein targeting to mitochondrion,regulation of neuron projection development,protein ubiquitination,regulation of protein stability,regulation of locomotion,protein ubiquitination involved in ubiquitin-dependent protein catabolic process,post-translational protein modification,negative regulation of lymphocyte di…
2.89581	0.0958324	0.0364958	O14657	TOR1B	Torsin-1B	TOR1B_HUMAN	1	nuclear envelope,endoplasmic reticulum,endoplasmic reticulum lumen,nuclear membrane,extracellular exosome	protein binding,ATP binding,ATPase activity	response to unfolded protein,endoplasmic reticulum organization,chaperone mediated protein folding requiring cofactor,protein homooligomerization,nuclear membrane organization
2.85824	0.073386	0.0291057	P37837	TALDO1	Transaldolase	TALDO_HUMAN	2	nucleus,nucleoplasm,cytoplasm,cytosol,extracellular exosome	sedoheptulose-7-phosphate:D-glyceraldehyde-3-phosphate glyceronetransferase activity,protein binding,monosaccharide binding	carbohydrate metabolic process,xylulose biosynthetic process,fructose 6-phosphate metabolic process,pentose-phosphate shunt,pentose-phosphate shunt, non-oxidative branch,interleukin-12-mediated signaling pathway
2.80946	0.165446	0.0581697	Q8N302	AGGF1	Angiogenic factor with G patch and FHA domains 1	AGGF1_HUMAN	1	extracellular region,cytoplasm,perinuclear region of cytoplasm	nucleic acid binding,protein binding	angiogenesis,vasculogenesis,positive regulation of endothelial cell proliferation,cell adhesion,positive regulation of angiogenesis
2.8049	1.54101e-17	5.56389e-17	Q13098	GPS1	COP9 signalosome complex subunit 1	CSN1_HUMAN	14	nucleoplasm,cytosol,COP9 signalosome	GTPase inhibitor activity,protein binding	inactivation of MAPK activity,protein deneddylation,nucleotide-excision repair, DNA damage recognition,transcription-coupled nucleotide-excision repair,cell cycle,JNK cascade,negative regulation of GTPase activity,post-translational protein modification
2.78774	0.0787964	0.030916	P60903	S100A10	Protein S100-A10	S10AA_HUMAN	1	extracellular region,endoplasmic reticulum,extrinsic component of plasma membrane,extracellular exosome,membrane raft	calcium ion binding,protein binding,protein homodimerization activity,ion channel binding,lipid binding	membrane raft assembly,membrane budding,response to drug,positive regulation of GTPase activity,positive regulation of binding,protein heterotetramerization,positive regulation of stress fiber assembly,positive regulation of focal adhesion assembly,protein localization to plasma membrane,positive regulation of substrate adhesion-dependent cell spreading
2.78131	6.33893e-37	7.46283e-36	Q9BT78	COPS4	COP9 signalosome complex subunit 4	CSN4_HUMAN	18	nucleus,nucleoplasm,cytosol,synaptic vesicle,COP9 signalosome,nuclear speck,cell junction,extracellular exosome	protein binding,NEDD8-specific protease activity	protein deneddylation,nucleotide-excision repair, DNA damage recognition,transcription-coupled nucleotide-excision repair,post-translational protein modification
2.75211	1.89369e-07	2.35973e-07	Q9BT73	PSMG3	Proteasome assembly chaperone 3	PSMG3_HUMAN	5	proteasome complex
2.74876	5.83337e-09	8.79705e-09	Q9BRP4	PAAF1	Proteasomal ATPase-associated factor 1	PAAF1_HUMAN	9	proteasome complex	protein binding	viral process
2.73311	5.60188e-13	1.33623e-12	Q99627	COPS8	COP9 signalosome complex subunit 8	CSN8_HUMAN	6	nucleus,nucleoplasm,cytosol,COP9 signalosome,perinuclear region of cytoplasm,extracellular exosome	protein binding	protein deneddylation,nucleotide-excision repair, DNA damage recognition,transcription-coupled nucleotide-excision repair,activation of NF-kappaB-inducing kinase activity,negative regulation of cell proliferation,COP9 signalosome assembly,post-translational protein modification
2.71314	0.172041	0.0601461	Q15059	BRD3	Bromodomain-containing protein 3	BRD3_HUMAN	1	nucleus	chromatin binding,protein binding,lysine-acetylated histone binding	transcription, DNA-templated,regulation of transcription from RNA polymerase II promoter,chromatin modification
2.70196	2.11727e-08	2.97224e-08	Q7L5N1	COPS6	COP9 signalosome complex subunit 6	CSN6_HUMAN	7	nucleoplasm,cytosol,COP9 signalosome,extracellular exosome	protein binding	protein deneddylation,nucleotide-excision repair, DNA damage recognition,transcription-coupled nucleotide-excision repair,viral process,post-translational protein modification
2.63215	0.0765362	0.0301762	Q3SYG4	BBS9	Protein PTHB1	PTHB1_HUMAN	2	pericentriolar material,cytosol,cilium,membrane,centriolar satellite,BBSome,ciliary transition zone,ciliary membrane	molecular_function,protein binding	visual perception,protein transport,fat cell differentiation,response to stimulus,cilium morphogenesis,protein localization to cilium
2.62808	0.00641689	0.00349136	Q8NFU5	IPMK	Inositol polyphosphate multikinase	IPMK_HUMAN	1	nucleus,nucleoplasm,nucleolus	inositol-1,4,5-trisphosphate 6-kinase activity,inositol tetrakisphosphate 3-kinase activity,inositol tetrakisphosphate 6-kinase activity,ATP binding,inositol-1,4,5-trisphosphate 3-kinase activity,inositol tetrakisphosphate 5-kinase activity	phosphorylation,inositol phosphate biosynthetic process,inositol phosphate metabolic process
2.61753	0.328759	0.103688	Q6ZNG0	ZNF620	Zinc finger protein 620	ZN620_HUMAN	1	nucleus	DNA binding,metal ion binding	transcription, DNA-templated,regulation of transcription, DNA-templated
2.59493	0.310014	0.0987248	Q8TBZ8	ZNF564	Zinc finger protein 564	ZN564_HUMAN	1	nucleus	transcription factor activity, sequence-specific DNA binding,protein binding,transcription regulatory region DNA binding,metal ion binding	negative regulation of transcription from RNA polymerase II promoter,transcription, DNA-templated,positive regulation of transcription from RNA polymerase II promoter
2.59433	0.33649	0.105692	Q8NBN3	TMEM87A	Transmembrane protein 87A	TM87A_HUMAN	1	cytosol,integral component of membrane,Golgi cisterna membrane		retrograde transport, endosome to Golgi
2.58597	1.21327e-61	3.81683e-60	P17980	PSMC3	26S protease regulatory subunit 6A	PRS6A_HUMAN	33	proteasome complex,cytoplasmic mRNA processing body,extracellular region,nucleus,nucleoplasm,cytosol,proteasome regulatory particle, base subcomplex,membrane,proteasome accessory complex,nuclear proteasome complex,cytosolic proteasome complex,secretory granule lumen,ficolin-1-rich granule lumen	protein binding,ATP binding,ATPase activity,TBP-class protein binding,proteasome-activating ATPase activity,identical protein binding	MAPK cascade,protein polyubiquitination,blastocyst development,stimulatory C-type lectin receptor signaling pathway,antigen processing and presentation of exogenous peptide antigen via MHC class I, TAP-dependent,regulation of cellular amino acid metabolic process,negative regulation of G2/M transition of mitotic cell cycle,viral process,protein deubiquitination,ER-associated ubiquitin-dependent p…
2.55588	0.0139524	0.00690334	Q99504	EYA3	Eyes absent homolog 3	EYA3_HUMAN	3	nucleus,nucleoplasm,transcription factor complex,cytoplasm,centrosome	protein tyrosine phosphatase activity,protein binding,metal ion binding	double-strand break repair,transcription, DNA-templated,regulation of transcription, DNA-templated,multicellular organism development,visual perception,anatomical structure morphogenesis,response to ionizing radiation,histone dephosphorylation,cell differentiation,peptidyl-tyrosine dephosphorylation,positive regulation of DNA repair,negative regulation of extrinsic apoptotic signaling pathway in …
2.5444	0.00952469	0.00495604	Q6GQQ9;Q8TE49	OTUD7B;OTUD7A	OTU domain-containing protein 7B;OTU domain-containing protein 7A	OTU7B_HUMAN;OTU7A_HUMAN	1	nucleus,cytoplasm,cytosol;nucleus,cytoplasm,cytosol	DNA binding,thiol-dependent ubiquitin-specific protease activity,protein binding,cysteine-type peptidase activity,zinc ion binding,thiol-dependent ubiquitinyl hydrolase activity,K63-linked polyubiquitin binding,Lys48-specific deubiquitinase activity;DNA binding,thiol-dependent ubiquitin-specific protease activity,zinc ion binding,thiol-dependent ubiquitinyl hydrolase activity,K63-linked polyubiqu…	negative regulation of transcription from RNA polymerase II promoter,adaptive immune response,mucosal immune response,immune response,protein deubiquitination,negative regulation of interleukin-8 production,protein K11-linked deubiquitination,negative regulation of I-kappaB kinase/NF-kappaB signaling,protein K63-linked deubiquitination,protein K48-linked deubiquitination,protein deubiquitination …
2.53962	0.00133432	0.000863158	Q9UKL3	CASP8AP2	CASP8-associated protein 2	C8AP2_HUMAN	2	nucleus,cytoplasm,mitochondrion,PML body	DNA binding,transcription corepressor activity,death receptor binding,protein binding,cysteine-type endopeptidase activator activity involved in apoptotic process,peptidase activator activity involved in apoptotic process,SUMO polymer binding	transcription, DNA-templated,regulation of transcription, DNA-templated,activation of cysteine-type endopeptidase activity involved in apoptotic process,cell cycle,signal transduction,extrinsic apoptotic signaling pathway via death domain receptors,Fas signaling pathway,cellular response to mechanical stimulus,apoptotic signaling pathway,negative regulation of nucleic acid-templated transcription
2.53392	0.452655	0.135282	O15228	GNPAT	Dihydroxyacetone phosphate acyltransferase	GNPAT_HUMAN	2	mitochondrion,peroxisome,peroxisomal membrane,peroxisomal matrix,membrane	receptor binding,glycerone-phosphate O-acyltransferase activity,palmitoyl-CoA hydrolase activity	phosphatidic acid biosynthetic process,synapse assembly,response to nutrient,ether lipid biosynthetic process,cerebellum morphogenesis,paranodal junction assembly,response to drug,response to starvation,membrane organization,response to fatty acid
2.51735	7.50021e-11	1.41038e-10	Q9NR46	SH3GLB2	Endophilin-B2	SHLB2_HUMAN	10	nucleoplasm,cytoplasm,cytosol	protein binding,identical protein binding,cadherin binding
2.50949	9.99067e-61	3.11741e-59	Q13200	PSMD2	26S proteasome non-ATPase regulatory subunit 2	PSMD2_HUMAN	61	proteasome complex,extracellular region,nucleus,nucleoplasm,cytosol,proteasome regulatory particle,proteasome regulatory particle, base subcomplex,membrane,proteasome accessory complex,proteasome storage granule,secretory granule lumen,extracellular exosome,ficolin-1-rich granule lumen	protein binding,enzyme regulator activity,endopeptidase activity	MAPK cascade,protein polyubiquitination,stimulatory C-type lectin receptor signaling pathway,antigen processing and presentation of exogenous peptide antigen via MHC class I, TAP-dependent,regulation of cellular amino acid metabolic process,negative regulation of G2/M transition of mitotic cell cycle,protein deubiquitination,anaphase-promoting complex-dependent catabolic process,SCF-dependent pro…
2.50616	0.126446	0.0462148	Q9NZ71	RTEL1	Regulator of telomere elongation helicase 1	RTEL1_HUMAN	1	chromosome, telomeric region,nucleus,nucleoplasm	DNA binding,ATP-dependent DNA helicase activity,protein binding,ATP binding,metal ion binding,4 iron, 4 sulfur cluster binding	telomere maintenance,strand displacement,DNA repair,regulation of double-strand break repair via homologous recombination,replication fork processing,positive regulation of telomere maintenance,DNA duplex unwinding,telomere maintenance in response to DNA damage,negative regulation of DNA recombination,telomeric loop disassembly,mitotic telomere maintenance via semi-conservative replication,positi…
2.49292	3.10578e-81	1.67887e-79	P50990	CCT8	T-complex protein 1 subunit theta	TCPQ_HUMAN	34	zona pellucida receptor complex,extracellular region,nucleoplasm,cytoplasm,centrosome,cytosol,chaperonin-containing T-complex,microtubule,cilium,secretory granule lumen,azurophil granule lumen,cell body,intermediate filament cytoskeleton,extracellular exosome,ficolin-1-rich granule lumen	protein binding,ATP binding,ATPase activity, coupled,protein binding involved in protein folding,cadherin binding,unfolded protein binding	protein folding,'de novo' protein folding,binding of sperm to zona pellucida,positive regulation of telomere maintenance via telomerase,neutrophil degranulation,pore complex assembly,protein stabilization,chaperone-mediated protein folding,toxin transport,positive regulation of establishment of protein localization to telomere,positive regulation of protein localization to Cajal body,positive reg…
2.48179	0.155988	0.0552442	Q9NWU2	GID8	Glucose-induced degradation protein 8 homolog	GID8_HUMAN	2	nucleoplasm,cell junction	protein binding
2.46368	0.0559589	0.0229529	Q9P1Q0	VPS54	Vacuolar protein sorting-associated protein 54	VPS54_HUMAN	1	GARP complex,nucleoplasm,Golgi apparatus,trans-Golgi network,cytosol,trans-Golgi network membrane,perinuclear region of cytoplasm	protein binding,syntaxin binding	Golgi to vacuole transport,lysosomal transport,protein transport,growth,retrograde transport, endosome to Golgi,homeostasis of number of cells within a tissue,musculoskeletal movement,neurofilament cytoskeleton organization
2.46201	0.034428	0.0150547	Q8TC71	SPATA18	Mitochondria-eating protein	MIEAP_HUMAN	1	cytoplasm,mitochondrial outer membrane,intracellular membrane-bounded organelle	protein binding	cellular response to DNA damage stimulus,mitochondrial protein catabolic process,mitophagy by induced vacuole formation
2.44927	4.57297e-07	5.37058e-07	Q9UBW8	COPS7A	COP9 signalosome complex subunit 7a	CSN7A_HUMAN	4	nucleoplasm,cytosol,COP9 signalosome	protein binding	protein deneddylation,nucleotide-excision repair, DNA damage recognition,transcription-coupled nucleotide-excision repair,post-translational protein modification
2.40965	0.0363672	0.0158179	Q502W6	VWA3B	von Willebrand factor A domain-containing protein 3B	VWA3B_HUMAN	1	cytoplasm
2.37342	5.26121e-42	7.67777e-41	Q99460	PSMD1	26S proteasome non-ATPase regulatory subunit 1	PSMD1_HUMAN	42	proteasome complex,extracellular region,nucleus,nucleoplasm,cytosol,proteasome regulatory particle,proteasome regulatory particle, base subcomplex,membrane,proteasome accessory complex,proteasome storage granule,azurophil granule lumen,extracellular exosome	enzyme regulator activity,endopeptidase activity	MAPK cascade,protein polyubiquitination,stimulatory C-type lectin receptor signaling pathway,antigen processing and presentation of exogenous peptide antigen via MHC class I, TAP-dependent,regulation of cellular amino acid metabolic process,negative regulation of G2/M transition of mitotic cell cycle,protein deubiquitination,anaphase-promoting complex-dependent catabolic process,SCF-dependent pro…
2.36595	3.55715e-46	6.32054e-45	P62195	PSMC5	26S protease regulatory subunit 8	PRS8_HUMAN	30	proteasome complex,nucleus,nucleoplasm,cytoplasm,cytosol,proteasome regulatory particle, base subcomplex,membrane,inclusion body,proteasome accessory complex,cytoplasmic vesicle,nuclear proteasome complex,cytosolic proteasome complex,extracellular exosome,blood microparticle,postsynapse	protein binding,ATP binding,transcription factor binding,ATPase activity,TBP-class protein binding,thyrotropin-releasing hormone receptor binding,proteasome-activating ATPase activity	MAPK cascade,protein polyubiquitination,stimulatory C-type lectin receptor signaling pathway,antigen processing and presentation of exogenous peptide antigen via MHC class I, TAP-dependent,regulation of transcription from RNA polymerase II promoter,regulation of cellular amino acid metabolic process,negative regulation of G2/M transition of mitotic cell cycle,protein deubiquitination,ER-associate…
2.35691	0.0055427	0.0030657	Q9C0G6	DNAH6	Dynein heavy chain 6, axonemal	DYH6_HUMAN	1	axonemal dynein complex,microtubule,cilium,dynein complex	ATP binding,ATP-dependent microtubule motor activity, minus-end-directed,dynein light chain binding,dynein intermediate chain binding,dynein light intermediate chain binding	cilium or flagellum-dependent cell motility,microtubule-based movement,cilium morphogenesis
2.35669	2.93064e-31	2.64033e-30	Q9UHX1	PUF60	Poly(U)-binding-splicing factor PUF60	PUF60_HUMAN	21	nucleoplasm,cell junction,intracellular ribonucleoprotein complex,cyclin-dependent protein kinase activating kinase holoenzyme complex	DNA binding,RNA binding,protein binding,identical protein binding,cadherin binding	mRNA splicing, via spliceosome,transcription, DNA-templated,regulation of transcription, DNA-templated,apoptotic process
2.35442	0.022227	0.0103347	P32019	INPP5B	Type II inositol 1,4,5-trisphosphate 5-phosphatase	I5P2_HUMAN	3	endoplasmic reticulum-Golgi intermediate compartment,Golgi apparatus,cytosol,plasma membrane,membrane,integral component of membrane,phagocytic vesicle membrane,early endosome membrane	phosphatidylinositol-4,5-bisphosphate 5-phosphatase activity,GTPase activator activity,protein binding,metal ion binding,inositol-1,4,5-trisphosphate 5-phosphatase activity,inositol-1,3,4,5-tetrakisphosphate 5-phosphatase activity	in utero embryonic development,signal transduction,spermatogenesis,flagellated sperm motility,positive regulation of GTPase activity,inositol phosphate metabolic process,phosphatidylinositol dephosphorylation,regulation of small GTPase mediated signal transduction,regulation of protein processing
2.34228	0.711622	0.196086	Q17R31	TATDN3	Putative deoxyribonuclease TATDN3	TATD3_HUMAN	1	nucleus	nuclease activity,metal ion binding	nucleic acid phosphodiester bond hydrolysis
2.3385	0.174713	0.0609313	Q8IUW3	SPATA2L	Spermatogenesis-associated protein 2-like protein	SPA2L_HUMAN	1
2.33637	0.108033	0.0403925	P30291	WEE1	Wee1-like protein kinase	WEE1_HUMAN	2	nucleus,nucleoplasm,nucleolus,cytoplasm	magnesium ion binding,protein tyrosine kinase activity,non-membrane spanning protein tyrosine kinase activity,protein binding,ATP binding,kinase activity	G1/S transition of mitotic cell cycle,G2/M transition of mitotic cell cycle,microtubule cytoskeleton organization,peptidyl-tyrosine phosphorylation,establishment of cell polarity,neuron projection morphogenesis,cell division,regulation of cell cycle
2.3342	6.7265e-44	1.0893e-42	P43686	PSMC4	26S protease regulatory subunit 6B	PRS6B_HUMAN	44	proteasome complex,nucleus,nucleoplasm,cytosol,proteasome regulatory particle, base subcomplex,membrane,inclusion body,proteasome accessory complex,nuclear proteasome complex,cytosolic proteasome complex,synapse	protein binding,ATP binding,ATPase activity,TBP-class protein binding,proteasome-activating ATPase activity	MAPK cascade,protein polyubiquitination,blastocyst development,stimulatory C-type lectin receptor signaling pathway,antigen processing and presentation of exogenous peptide antigen via MHC class I, TAP-dependent,proteolysis,regulation of cellular amino acid metabolic process,negative regulation of G2/M transition of mitotic cell cycle,protein deubiquitination,ER-associated ubiquitin-dependent pro…
2.33168	0.232451	0.0775915	Q92696	RABGGTA	Geranylgeranyl transferase type-2 subunit alpha	PGTA_HUMAN	2	nucleoplasm,cytosol,plasma membrane,Rab-protein geranylgeranyltransferase complex	Rab geranylgeranyltransferase activity,zinc ion binding,Rab GTPase binding,protein heterodimerization activity	protein complex assembly,cellular protein modification process,visual perception,protein geranylgeranylation,regulation of apoptotic process,post-translational protein modification
2.3217	1.19859e-05	1.13361e-05	Q8TE02	ELP5	Elongator complex protein 5	ELP5_HUMAN	5	nucleus,cytoplasm,cytosol,Elongator holoenzyme complex	protein binding	tRNA wobble uridine modification,transcription, DNA-templated,regulation of transcription, DNA-templated,positive regulation of cell migration
2.3111	0.0443356	0.0188064	Q8TDR0	TRAF3IP1	TRAF3-interacting protein 1	MIPT3_HUMAN	1	centrosome,cilium,axoneme,intraciliary transport particle B,ciliary transition zone,ciliary basal body,ciliary tip,ciliary base	protein binding,microtubule binding	morphogenesis of a polarized epithelium,kidney development,negative regulation of protein phosphorylation,neural tube patterning,embryonic camera-type eye development,negative regulation of protein complex assembly,negative regulation of type I interferon production,negative regulation of interferon-beta production,embryonic heart tube development,intraciliary transport involved in cilium morphog…
2.2902	0.0400005	0.0172071	P57768	SNX16	Sorting nexin-16	SNX16_HUMAN	1	lysosome,early endosome,late endosome,cytosol,extrinsic component of endosome membrane,early endosome membrane,late endosome membrane,intracellular membrane-bounded organelle	phosphatidylinositol binding,identical protein binding	protein targeting to lysosome,endosome to lysosome transport,early endosome to late endosome transport
2.28845	0.00782507	0.00415504	Q8WU20	FRS2	Fibroblast growth factor receptor substrate 2	FRS2_HUMAN	1	endosome,plasma membrane,integral component of plasma membrane,cell-cell adherens junction,membrane	transmembrane receptor protein tyrosine kinase adaptor activity,Ras guanyl-nucleotide exchange factor activity,fibroblast growth factor receptor binding,neurotrophin TRKA receptor binding,protein binding,1-phosphatidylinositol-3-kinase activity,phosphatase activator activity,phosphatidylinositol-4,5-bisphosphate 3-kinase activity	MAPK cascade,activation of MAPKK activity,activation of MAPK activity,gastrulation with mouth forming second,organ induction,ventricular septum development,transmembrane receptor protein tyrosine phosphatase signaling pathway,G-protein coupled receptor signaling pathway,neuroblast proliferation,axon guidance,fibroblast growth factor receptor signaling pathway,anterior/posterior axis specification…
2.27911	0.44575	0.133548	Q86UD4	ZNF329	Zinc finger protein 329	ZN329_HUMAN	2	nucleus	DNA binding,protein binding,metal ion binding	transcription, DNA-templated,regulation of transcription, DNA-templated
2.27783	0.269134	0.0876875	Q96GE4	CEP95	Centrosomal protein of 95 kDa	CEP95_HUMAN	1	spindle pole,cytoplasm,centrosome	protein binding
2.26461	1.05406e-07	1.3612e-07	Q14004	CDK13	Cyclin-dependent kinase 13	CDK13_HUMAN	9	cyclin K-CDK13 complex,extracellular region,extracellular space,nucleoplasm,chromosome,Golgi apparatus,cytosol,cyclin/CDK positive transcription elongation factor complex,nuclear speck,nuclear cyclin-dependent protein kinase holoenzyme complex,ficolin-1-rich granule lumen	RNA binding,protein kinase activity,cyclin-dependent protein serine/threonine kinase activity,protein binding,ATP binding,transcription factor binding,RNA polymerase II carboxy-terminal domain kinase activity,protein kinase binding,cyclin binding,transcription regulatory region DNA binding	alternative mRNA splicing, via spliceosome,transcription elongation from RNA polymerase II promoter,regulation of mitotic nuclear division,multicellular organism development,positive regulation of cell proliferation,viral process,hemopoiesis,neutrophil degranulation,positive regulation of transcription from RNA polymerase II promoter,phosphorylation of RNA polymerase II C-terminal domain,negative…
2.25375	0.00486964	0.00272842	Q53HC0	CCDC92	Coiled-coil domain-containing protein 92	CCD92_HUMAN	5	nucleoplasm,centrosome,centriole,intracellular membrane-bounded organelle	protein binding
2.25109	3.55789e-10	6.20126e-10	P48382	RFX5	DNA-binding protein RFX5	RFX5_HUMAN	7	nucleus	RNA polymerase II core promoter proximal region sequence-specific DNA binding,transcriptional activator activity, RNA polymerase II transcription regulatory region sequence-specific binding,DNA binding,transcription factor activity, sequence-specific DNA binding,protein binding,sequence-specific DNA binding	negative regulation of transcription from RNA polymerase II promoter,regulation of transcription from RNA polymerase II promoter,transcription from RNA polymerase II promoter,positive regulation of transcription from RNA polymerase II promoter
2.20658	0.300335	0.0961133	Q5T0F9	CC2D1B	Coiled-coil and C2 domain-containing protein 1B	C2D1B_HUMAN	1	nucleus,nucleoplasm,intracellular membrane-bounded organelle	RNA polymerase II core promoter proximal region sequence-specific DNA binding,RNA polymerase II transcription factor activity, sequence-specific DNA binding,transcriptional repressor activity, RNA polymerase II core promoter proximal region sequence-specific binding,protein binding	negative regulation of transcription from RNA polymerase II promoter,transcription, DNA-templated
2.18402	0.100899	0.0381454	O95490	ADGRL2	Adhesion G protein-coupled receptor L2	AGRL2_HUMAN	2	integral component of membrane	G-protein coupled receptor activity,latrotoxin receptor activity,carbohydrate binding	cell surface receptor signaling pathway,G-protein coupled receptor signaling pathway
2.17371	0.0188515	0.00897222	Q13615	MTMR3	Myotubularin-related protein 3	MTMR3_HUMAN	1	cytoplasm,cytosol,membrane,extrinsic component of membrane	phosphatidylinositol-3-phosphatase activity,protein serine/threonine phosphatase activity,protein tyrosine phosphatase activity,protein binding,protein phosphatase binding,metal ion binding,phosphatidylinositol-3,5-bisphosphate 3-phosphatase activity	protein dephosphorylation,phosphatidylinositol biosynthetic process,macroautophagy,peptidyl-tyrosine dephosphorylation,cellular response to glucose starvation,phosphatidylinositol dephosphorylation,regulation of phosphatidylinositol dephosphorylation,phosphatidylinositol 5-phosphate metabolic process,regulation of autophagosome assembly
2.16842	4.57462e-07	5.37087e-07	Q9UKK9	NUDT5	ADP-sugar pyrophosphatase	NUDT5_HUMAN	9	intracellular,nucleus,cytosol,extracellular exosome	magnesium ion binding,protein binding,nucleotidyltransferase activity,ADP-sugar diphosphatase activity,snoRNA binding,protein homodimerization activity,8-oxo-dGDP phosphatase activity,ADP-ribose diphosphatase activity,m7G(5')pppN diphosphatase activity	chromatin remodeling,nucleotide metabolic process,ribonucleoside diphosphate catabolic process,D-ribose catabolic process,nucleobase-containing small molecule catabolic process,ATP generation from poly-ADP-D-ribose
2.16505	0.085454	0.0331386	Q9NWU5	MRPL22	39S ribosomal protein L22, mitochondrial	RM22_HUMAN	2	mitochondrion,mitochondrial inner membrane,mitochondrial large ribosomal subunit	RNA binding,structural constituent of ribosome	mitochondrial translational elongation,mitochondrial translational termination
2.15795	2.28014e-30	1.96215e-29	Q99832	CCT7	T-complex protein 1 subunit eta	TCPH_HUMAN	23	zona pellucida receptor complex,cytoplasm,mitochondrion,cytosol,chaperonin-containing T-complex,microtubule,cell body,extracellular exosome	protein binding,ATP binding,identical protein binding,protein binding involved in protein folding,unfolded protein binding	protein folding,'de novo' protein folding,binding of sperm to zona pellucida,positive regulation of telomere maintenance via telomerase,protein stabilization,chaperone-mediated protein folding,toxin transport,positive regulation of establishment of protein localization to telomere,positive regulation of protein localization to Cajal body,positive regulation of telomerase RNA localization to Cajal…
2.15447	0.124944	0.0457307	Q16566	CAMK4	Calcium/calmodulin-dependent protein kinase type IV	KCC4_HUMAN	3	fibrillar center,nucleus,nucleoplasm,cytoplasm,cytosol,extracellular exosome	calmodulin-dependent protein kinase activity,calmodulin binding,ATP binding,calcium-dependent protein serine/threonine kinase activity	adaptive immune response,protein phosphorylation,inflammatory response,signal transduction,long-term memory,peptidyl-serine phosphorylation,regulation of T cell differentiation in thymus,intracellular signal transduction,myeloid dendritic cell differentiation,regulation of osteoclast differentiation,positive regulation of transcription, DNA-templated,protein autophosphorylation,myeloid dendritic …
2.15011	6.72299e-08	8.88528e-08	O95684	FGFR1OP	FGFR1 oncogene partner	FR1OP_HUMAN	7	nucleus,centrosome,centriole,cytosol,cell projection,perinuclear region of cytoplasm	protein tyrosine kinase activity,protein binding,protein kinase binding,protein tyrosine kinase inhibitor activity,protein homodimerization activity	G2/M transition of mitotic cell cycle,negative regulation of protein kinase activity,positive regulation of cell proliferation,regulation of G2/M transition of mitotic cell cycle,peptidyl-tyrosine phosphorylation,positive regulation of cell growth,positive regulation of cell migration,microtubule anchoring,negative regulation of protein tyrosine kinase activity,ciliary basal body docking
2.12309	0.102552	0.0386713	Q99683	MAP3K5	Mitogen-activated protein kinase kinase kinase 5	M3K5_HUMAN	1	cytosol,external side of plasma membrane,protein complex,protein kinase complex,IRE1-TRAF2-ASK1 complex	magnesium ion binding,protein kinase activity,protein serine/threonine kinase activity,MAP kinase kinase kinase activity,protein binding,ATP binding,protein kinase binding,protein phosphatase binding,protein domain specific binding,identical protein binding,protein homodimerization activity	MAPK cascade,activation of MAPKK activity,response to ischemia,protein phosphorylation,JNK cascade,activation of JUN kinase activity,intrinsic apoptotic signaling pathway in response to oxidative stress,positive regulation of cardiac muscle cell apoptotic process,viral process,cellular response to amino acid starvation,response to endoplasmic reticulum stress,p38MAPK cascade,wound healing,positiv…
2.12091	1.47892e-06	1.61942e-06	O43768	ENSA	Alpha-endosulfine	ENSA_HUMAN	5	nucleoplasm,cytoplasm	protein phosphatase inhibitor activity,receptor binding,protein binding,ion channel inhibitor activity,phosphatase inhibitor activity,potassium channel inhibitor activity,protein phosphatase regulator activity,protein phosphatase 2A binding	G2/M transition of mitotic cell cycle,mitotic cell cycle,transport,response to nutrient,response to glucose,negative regulation of phosphoprotein phosphatase activity,negative regulation of protein dephosphorylation,regulation of insulin secretion,cell division
2.10067	0.0246625	0.0113039	Q9Y366	IFT52	Intraflagellar transport protein 52 homolog	IFT52_HUMAN	3	centrosome,centriole,cilium,intraciliary transport particle B,motile cilium,photoreceptor connecting cilium,dendrite terminus,ciliary tip,ciliary base	protein C-terminus binding	neural tube formation,heart looping,smoothened signaling pathway,dorsal/ventral pattern formation,intraciliary anterograde transport,intraciliary transport involved in cilium morphogenesis,embryonic digit morphogenesis,negative regulation of epithelial cell proliferation,cilium morphogenesis,regulation of protein processing,Requires Ontology
2.08708	3.86648e-09	5.93108e-09	Q9Y5X3	SNX5	Sorting nexin-5	SNX5_HUMAN	9	ruffle,phagocytic cup,cytosol,cytoplasmic vesicle membrane,retromer complex,retromer, tubulation complex,extrinsic component of cytoplasmic side of plasma membrane,extrinsic component of endosome membrane,macropinocytic cup,tubular endosome,early endosome membrane	protein binding,dynactin binding,phosphatidylinositol binding,cadherin binding,protein heterodimerization activity	intracellular protein transport,pinocytosis,vesicle organization,regulation of macroautophagy,retrograde transport, endosome to Golgi
2.07142	0.144907	0.0519478	Q01638	IL1RL1	Interleukin-1 receptor-like 1	ILRL1_HUMAN	1	proteinaceous extracellular matrix,plasma membrane,external side of plasma membrane,integral component of membrane	interleukin-33 binding,interleukin-33 receptor activity,cytokine receptor activity,interleukin-1 receptor activity,receptor signaling protein activity,protein binding	negative regulation of T-helper 1 type immune response,immune response,signal transduction,negative regulation of interferon-gamma production,positive regulation of interleukin-5 production,interleukin-33-mediated signaling pathway,positive regulation of macrophage activation,negative regulation of I-kappaB kinase/NF-kappaB signaling,positive regulation of inflammatory response,positive regulatio…
2.06088	0.000114708	9.23152e-05	Q96RE7	NACC1	Nucleus accumbens-associated protein 1	NACC1_HUMAN	5	nucleus,nucleoplasm,cytoplasm,nuclear body,cell junction,intracellular membrane-bounded organelle		transcription, DNA-templated,positive regulation of cell proliferation,negative regulation of transcription, DNA-templated,protein homooligomerization
2.05992	2.78877e-11	5.52857e-11	Q92905	COPS5	COP9 signalosome complex subunit 5	CSN5_HUMAN	14	nucleus,nucleoplasm,cytoplasm,cytosol,eukaryotic translation initiation factor 3 complex,synaptic vesicle,COP9 signalosome,cell junction,perinuclear region of cytoplasm,chromatin	transcription coactivator activity,translation initiation factor activity,thiol-dependent ubiquitin-specific protease activity,protein binding,metallopeptidase activity,NEDD8-specific protease activity,enzyme binding,macrophage migration inhibitory factor binding,metal ion binding	protein deneddylation,nucleotide-excision repair, DNA damage recognition,transcription-coupled nucleotide-excision repair,transcription from RNA polymerase II promoter,translation,translational initiation,protein deubiquitination,negative regulation of apoptotic process,post-translational protein modification,positive regulation of transcription from RNA polymerase II promoter,regulation of JNK c…
2.05223	0.337377	0.105936	Q86WG5	SBF2	Myotubularin-related protein 13	MTMRD_HUMAN	1	vacuolar membrane,cytosol,membrane	protein binding,Rab guanyl-nucleotide exchange factor activity,phosphatase regulator activity,phosphatase binding,phosphatidylinositol binding,protein homodimerization activity	myelination,regulation of GTPase activity,protein tetramerization
2.03476	0.0167451	0.00809215	Q92613	JADE3	Protein Jade-3	JADE3_HUMAN	2	histone acetyltransferase complex	protein binding,metal ion binding	histone H3 acetylation,histone H4-K5 acetylation,histone H4-K8 acetylation,histone H4-K12 acetylation,histone H4-K16 acetylation
2.0304	0.000525488	0.000372107	O00221	NFKBIE	NF-kappa-B inhibitor epsilon	IKBE_HUMAN	2	fibrillar center,nucleus,cytoplasm,Golgi apparatus,cytosol,perinuclear region of cytoplasm	protein binding	D-serine transport,cytoplasmic sequestering of transcription factor
2.02495	0.000173557	0.000135032	Q6P1L5	FAM117B	Protein FAM117B	F117B_HUMAN	2		protein binding
2.01964	0.897397	0.235518	Q9C037	TRIM4	E3 ubiquitin-protein ligase TRIM4	TRIM4_HUMAN	2	cytoplasm,cytosol,plasma membrane	zinc ion binding,transferase activity	protein ubiquitination,innate immune response,protein trimerization
2.01949	0.0432955	0.0184291	Q9NZL4	HSPBP1	Hsp70-binding protein 1	HPBP1_HUMAN	1		enzyme inhibitor activity,protein binding	protein folding,positive regulation of protein ubiquitination,positive regulation of proteasomal ubiquitin-dependent protein catabolic process,negative regulation of catalytic activity
2.01935	0.000698427	0.000481856	O15021	MAST4	Microtubule-associated serine/threonine-protein kinase 4	MAST4_HUMAN	3	intracellular,cytoplasm	magnesium ion binding,protein serine/threonine kinase activity,ATP binding	peptidyl-serine phosphorylation,intracellular signal transduction,cytoskeleton organization
2.00168	0.124629	0.0456243	Q9NYU1	UGGT2	UDP-glucose:glycoprotein glucosyltransferase 2	UGGG2_HUMAN	1	endoplasmic reticulum,endoplasmic reticulum lumen,endoplasmic reticulum-Golgi intermediate compartment,protein complex,endoplasmic reticulum quality control compartment	UDP-glucose:glycoprotein glucosyltransferase activity,protein binding,unfolded protein binding	protein N-linked glycosylation via asparagine,endoplasmic reticulum unfolded protein response,'de novo' posttranslational protein folding,ER-associated misfolded protein catabolic process,UDP-glucosylation,endoplasmic reticulum mannose trimming
1.9952	1.87759e-08	2.64836e-08	Q15051	IQCB1	IQ calmodulin-binding motif-containing protein 1	IQCB1_HUMAN	11	photoreceptor outer segment,nucleoplasm,centrosome,centriole,cytosol,microtubule cytoskeleton,photoreceptor connecting cilium,intercellular bridge,extracellular exosome,mitotic spindle	protein binding,calmodulin binding,enzyme binding	photoreceptor cell maintenance,maintenance of animal organ identity,cilium morphogenesis,ciliary basal body docking
1.99295	0.117509	0.043357	Q9P212	PLCE1	1-phosphatidylinositol 4,5-bisphosphate phosphodiesterase epsilon-1	PLCE1_HUMAN	1	Golgi membrane,cytosol,plasma membrane	phosphatidylinositol phospholipase C activity,phospholipase C activity,receptor signaling protein activity,guanyl-nucleotide exchange factor activity,protein binding,Ras GTPase binding,enzyme binding,metal ion binding	activation of MAPK activity,regulation of cell growth,phospholipid metabolic process,diacylglycerol biosynthetic process,regulation of smooth muscle contraction,cytoskeleton organization,epidermal growth factor receptor signaling pathway,phospholipase C-activating G-protein coupled receptor signaling pathway,positive regulation of cytosolic calcium ion concentration,protein kinase C-activating G-…
1.97004	0.00035175	0.000257785	O60232	SSSCA1	Sjoegren syndrome/scleroderma autoantigen 1	SSA27_HUMAN	2		protein binding,identical protein binding	mitotic cell cycle,cell division
1.96356	1.80417e-06	1.94779e-06	Q9Y484	WDR45	WD repeat domain phosphoinositide-interacting protein 4	WIPI4_HUMAN	10	cytosol,extrinsic component of membrane,pre-autophagosomal structure membrane	phosphatidylinositol-3-phosphate binding,phosphatidylinositol-3,5-bisphosphate binding	mitophagy,protein lipidation,autophagy,protein localization to pre-autophagosomal structure,nucleophagy
1.95429	0.0264267	0.011996	Q8TAF3	WDR48	WD repeat-containing protein 48	WDR48_HUMAN	2	nucleus,nucleoplasm,lysosome,late endosome,intracellular membrane-bounded organelle	protein binding,thiol-dependent ubiquitinyl hydrolase activity	double-strand break repair via homologous recombination,spermatogenesis,single fertilization,viral process,protein deubiquitination,multicellular organism growth,skin development,embryonic organ development,skeletal system morphogenesis,homeostasis of number of cells,positive regulation of epithelial cell proliferation,seminiferous tubule development,regulation of protein monoubiquitination
1.94928	0.060769	0.0247041	Q96NB3	ZNF830	Zinc finger protein 830	ZN830_HUMAN	3	nucleus,nucleoplasm,chromosome,nuclear speck	nucleic acid binding,protein binding,zinc ion binding	mitotic cell cycle,ovarian follicle development,preantral ovarian follicle growth,blastocyst growth,transcription-coupled nucleotide-excision repair,nuclear DNA replication,mitotic DNA replication checkpoint,negative regulation of apoptotic process,mitotic DNA damage checkpoint,replication fork protection,chromosome organization,cell division,intestinal epithelial structure maintenance
1.94738	0.00721861	0.0038732	Q8TD10	MIPOL1	Mirror-image polydactyly gene 1 protein	MIPO1_HUMAN	2	nucleus	protein binding,identical protein binding
1.93908	0.0301176	0.0134034	O43310	CTIF	CBP80/20-dependent translation initiation factor	CTIF_HUMAN	2	cytosol,perinuclear region of cytoplasm	RNA binding,protein binding	nuclear-transcribed mRNA catabolic process, nonsense-mediated decay,regulation of translational initiation
1.93768	1.85888e-12	4.18439e-12	Q5TH69	ARFGEF3	Brefeldin A-inhibited guanine nucleotide-exchange protein 3	BIG3_HUMAN	18	integral component of membrane,transport vesicle membrane	ARF guanyl-nucleotide exchange factor activity	negative regulation of phosphatase activity,regulation of ARF protein signal transduction
1.93468	0.00202994	0.00125619	Q9UET6	FTSJ1	Putative tRNA (cytidine(32)/guanosine(34)-2'-O)-methyltransferase	TRM7_HUMAN	2	cytoplasm,cytosol	tRNA methyltransferase activity,tRNA (guanosine-2'-O-)-methyltransferase activity,tRNA (cytosine-2'-O-)-methyltransferase activity	cytoplasmic translation,tRNA modification,tRNA methylation
1.92241	0.0262832	0.011935	Q4L235	AASDH	Acyl-CoA synthetase family member 4	ACSF4_HUMAN	1		ATP binding,acid-thiol ligase activity	fatty acid metabolic process,beta-alanine metabolic process,amino acid activation for nonribosomal peptide biosynthetic process
1.91833	1.875e-06	2.01802e-06	Q9BYV9	BACH2	Transcription regulator protein BACH2	BACH2_HUMAN	5	nucleus,cytosol,Cul3-RING ubiquitin ligase complex	RNA polymerase II distal enhancer sequence-specific DNA binding,transcriptional repressor activity, RNA polymerase II distal enhancer sequence-specific binding,transcription factor activity, sequence-specific DNA binding,ubiquitin-protein transferase activity	negative regulation of transcription from RNA polymerase II promoter,transcription from RNA polymerase II promoter,protein ubiquitination,nuclear import
1.91802	5.97601e-05	5.07657e-05	O14492	SH2B2	SH2B adapter protein 2	SH2B2_HUMAN	3	cytoplasm,cytosol,plasma membrane	signal transducer activity,SH3/SH2 adaptor activity,protein binding,JAK pathway signal transduction adaptor activity	signal transduction,blood coagulation,insulin receptor signaling pathway,positive regulation of signal transduction,intracellular signal transduction,regulation of JAK-STAT cascade
1.91574	0.08403	0.0326623	Q9Y376	CAB39	Calcium-binding protein 39	CAB39_HUMAN	2	extracellular region,cytosol,secretory granule lumen,protein complex,extracellular exosome,serine/threonine protein kinase complex,ficolin-1-rich granule lumen	protein binding,kinase binding,protein kinase activator activity,protein serine/threonine kinase activator activity,protein serine/threonine kinase activity	cell cycle arrest,positive regulation of peptidyl-threonine phosphorylation,peptidyl-serine phosphorylation,signal transduction by protein phosphorylation,activation of protein kinase activity,intracellular signal transduction,neutrophil degranulation,protein heterooligomerization,cellular hypotonic response,positive regulation of protein serine/threonine kinase activity,negative regulation of po…
1.91374	0.0215483	0.0100562	Q6P1X5	TAF2	Transcription initiation factor TFIID subunit 2	TAF2_HUMAN	1	nucleoplasm,transcription factor TFIID complex,transcription factor TFTC complex	RNA polymerase II transcription factor activity, TBP-class protein binding, involved in preinitiation complex assembly,chromatin binding,protein binding,sequence-specific DNA binding,transcription regulatory region DNA binding,transcription factor activity, RNA polymerase II core promoter sequence-specific binding involved in preinitiation complex assembly	G2/M transition of mitotic cell cycle,transcription from RNA polymerase II promoter,transcription initiation from RNA polymerase II promoter,transcription elongation from RNA polymerase II promoter,response to organic cyclic compound,positive regulation of transcription from RNA polymerase II promoter,RNA polymerase II transcriptional preinitiation complex assembly,regulation of signal transducti…
1.90628	0.103682	0.0390549	P14314	PRKCSH	Glucosidase 2 subunit beta	GLU2B_HUMAN	2	intracellular,endoplasmic reticulum,endoplasmic reticulum lumen	protein kinase C binding,calcium ion binding,ion channel binding,phosphoprotein binding	protein folding,N-glycan processing,intracellular signal transduction,post-translational protein modification,cellular protein metabolic process
1.90476	0.00479343	0.0026924	Q9UH92	MLX	Max-like protein X	MLX_HUMAN	3	nucleus,nucleoplasm,cytoplasm,cytosol,nuclear membrane	RNA polymerase II regulatory region sequence-specific DNA binding,transcriptional repressor activity, RNA polymerase II transcription regulatory region sequence-specific binding,DNA binding,transcription factor activity, sequence-specific DNA binding,protein binding,transcription factor binding,protein homodimerization activity,protein heterodimerization activity	negative regulation of transcription from RNA polymerase II promoter,transcription, DNA-templated,regulation of transcription, DNA-templated,negative regulation of transcription, DNA-templated,positive regulation of transcription from RNA polymerase II promoter
1.90269	0.458389	0.136708	P33316	DUT	Deoxyuridine 5'-triphosphate nucleotidohydrolase, mitochondrial	DUT_HUMAN	2	nucleus,nucleoplasm,mitochondrion,cytosol,extracellular exosome	magnesium ion binding,RNA binding,dUTP diphosphatase activity,protein binding,receptor inhibitor activity,pyrimidine deoxyribonucleotide binding,peroxisome proliferator activated receptor binding	liver development,nucleobase-containing compound metabolic process,dUMP biosynthetic process,DNA replication,response to organic cyclic compound,nucleobase-containing small molecule interconversion,regulation of protein heterodimerization activity,dUTP catabolic process,protein homotrimerization,negative regulation of receptor activity
1.90233	1.15466e-10	2.12546e-10	P78318	IGBP1	Immunoglobulin-binding protein 1	IGBP1_HUMAN	9	cytoplasm,cytosol	protein binding,protein phosphatase regulator activity,protein phosphatase 2A binding	negative regulation of transcription from RNA polymerase II promoter,signal transduction,negative regulation of stress-activated MAPK cascade,response to tumor necrosis factor,regulation of dephosphorylation,B cell activation,negative regulation of cysteine-type endopeptidase activity involved in apoptotic process,regulation of phosphoprotein phosphatase activity,regulation of microtubule-based m…
1.89931	1.80396e-17	6.45256e-17	Q9UNH7	SNX6	Sorting nexin-6	SNX6_HUMAN	11	intracellular,nucleus,cytoplasm,cytosol,extrinsic component of membrane,retromer complex,retromer, tubulation complex,early endosome membrane,tubular endosome	protein binding,dynactin binding,phosphatidylinositol binding,protein homodimerization activity,protein heterodimerization activity	intracellular protein transport,endocytosis,negative regulation of epidermal growth factor-activated receptor activity,vesicle organization,regulation of macroautophagy,negative regulation of transforming growth factor beta receptor signaling pathway,retrograde transport, endosome to Golgi,negative regulation of transcription, DNA-templated,regulation of histamine secretion by mast cell
1.89892	0.000198774	0.000153063	Q86YT6	MIB1	E3 ubiquitin-protein ligase MIB1	MIB1_HUMAN	2	cytoplasm,centrosome,cytosol,plasma membrane,postsynaptic density,cytoplasmic vesicle	ubiquitin-protein transferase activity,protein binding,zinc ion binding	blood vessel development,in utero embryonic development,somitogenesis,neural tube formation,heart looping,endocytosis,Notch signaling pathway,protein ubiquitination,negative regulation of neuron differentiation,positive regulation of endocytosis
1.87181	4.12237e-13	9.93198e-13	Q15008	PSMD6	26S proteasome non-ATPase regulatory subunit 6	PSMD6_HUMAN	9	proteasome complex,extracellular region,nucleoplasm,cytosol,proteasome regulatory particle,proteasome accessory complex,secretory granule lumen,extracellular exosome,ficolin-1-rich granule lumen	protein binding,ATPase activity,enzyme regulator activity	MAPK cascade,protein polyubiquitination,stimulatory C-type lectin receptor signaling pathway,antigen processing and presentation of exogenous peptide antigen via MHC class I, TAP-dependent,proteolysis,regulation of cellular amino acid metabolic process,negative regulation of G2/M transition of mitotic cell cycle,protein deubiquitination,anaphase-promoting complex-dependent catabolic process,SCF-d…
1.86677	0.0124739	0.00625323	P61970	NUTF2	Nuclear transport factor 2	NTF2_HUMAN	1	nuclear inner membrane,nuclear outer membrane,nucleoplasm,cytosol,nuclear membrane,nuclear pore central transport channel,extracellular exosome	nucleocytoplasmic transporter activity,protein binding,Ran GTPase binding,protein transporter activity,identical protein binding	protein import into nucleus, translocation,protein import into nucleus,protein export from nucleus,nucleocytoplasmic transport,positive regulation of protein import into nucleus,mRNA transport,protein localization to nuclear pore,negative regulation of vascular endothelial growth factor production
1.86452	1.16583e-05	1.10562e-05	Q15052	ARHGEF6	Rho guanine nucleotide exchange factor 6	ARHG6_HUMAN	6	cytosol,lamellipodium	guanyl-nucleotide exchange factor activity,Rho guanyl-nucleotide exchange factor activity,GTPase activator activity,protein binding	apoptotic process,G-protein coupled receptor signaling pathway,JNK cascade,lamellipodium assembly,regulation of Rho protein signal transduction,positive regulation of apoptotic process,positive regulation of GTPase activity,regulation of small GTPase mediated signal transduction
1.86423	1.55518e-07	1.96471e-07	Q8TD26	CHD6	Chromodomain-helicase-DNA-binding protein 6	CHD6_HUMAN	5	nucleoplasm,DNA-directed RNA polymerase II, core complex	transcription cofactor binding,DNA binding,helicase activity,ATP binding,DNA-dependent ATPase activity	transcription, DNA-templated,viral process,chromatin modification,positive regulation of transcription from RNA polymerase II promoter in response to oxidative stress
1.85809	6.82573e-08	9.01175e-08	Q8WXA9	SREK1	Splicing regulatory glutamine/lysine-rich protein 1	SREK1_HUMAN	6	nucleoplasm,spliceosomal complex,nuclear speck	RNA binding,protein binding	regulation of alternative mRNA splicing, via spliceosome,mRNA processing,RNA splicing
1.85283	0.0488105	0.0204202	Q9NQ50	MRPL40	39S ribosomal protein L40, mitochondrial	RM40_HUMAN	1	nucleus,mitochondrial inner membrane,mitochondrial ribosome,mitochondrial large ribosomal subunit	RNA binding,protein binding	anatomical structure morphogenesis,mitochondrial translational elongation,mitochondrial translational termination
1.85254	0.216215	0.0729461	Q66K14	TBC1D9B	TBC1 domain family member 9B	TBC9B_HUMAN	2	intracellular,endomembrane system,integral component of membrane	GTPase activator activity,calcium ion binding,protein binding,Rab GTPase binding	intracellular protein transport,regulation of vesicle fusion,activation of GTPase activity,regulation of cilium assembly
1.84528	0.163664	0.0576488	P29375	KDM5A	Lysine-specific demethylase 5A	KDM5A_HUMAN	3	nucleus,nucleoplasm,nucleolus,protein-DNA complex,cyclin-dependent protein kinase activating kinase holoenzyme complex	core promoter sequence-specific DNA binding,DNA binding,transcription factor activity, sequence-specific DNA binding,transcription coactivator activity,protein binding,zinc ion binding,chromatin DNA binding,histone demethylase activity,histone demethylase activity (H3-trimethyl-K4 specific),histone demethylase activity (H3-dimethyl-K4 specific),methylated histone binding,histone binding,dioxygena…	negative regulation of transcription from RNA polymerase II promoter,transcription from RNA polymerase II promoter,spermatogenesis,male gonad development,circadian regulation of gene expression,histone H3-K4 demethylation,histone H3-K4 demethylation, trimethyl-H3-K4-specific,positive regulation of transcription, DNA-templated,regulation of sequence-specific DNA binding transcription factor activi…
1.84475	9.1188e-05	7.46543e-05	Q96PE2	ARHGEF17	Rho guanine nucleotide exchange factor 17	ARHGH_HUMAN	4	cytosol	guanyl-nucleotide exchange factor activity,Rho guanyl-nucleotide exchange factor activity	G-protein coupled receptor signaling pathway,actin cytoskeleton organization,regulation of Rho protein signal transduction,positive regulation of apoptotic process,regulation of small GTPase mediated signal transduction,regulation of molecular function
1.83759	0.0634213	0.0256546	Q9BU23	LMF2	Lipase maturation factor 2	LMF2_HUMAN	1	endoplasmic reticulum membrane,membrane,integral component of membrane	protein binding	protein maturation
1.83588	3.44347e-08	4.71833e-08	Q5HYK7	SH3D19	SH3 domain-containing protein 19	SH319_HUMAN	7	nucleoplasm,cytosol,plasma membrane	protein binding	cytoskeleton organization,regulation of cell morphogenesis,positive regulation of membrane protein ectodomain proteolysis
1.83588	2.63223e-07	3.21326e-07	Q7Z5L2	R3HCC1L	Coiled-coil domain-containing protein R3HCC1L	R3HCL_HUMAN	8	exon-exon junction complex	protein binding
1.8293	3.26112e-22	1.64686e-21	Q05519	SRSF11	Serine/arginine-rich splicing factor 11	SRS11_HUMAN	11	nucleus,nucleoplasm,nuclear speck	RNA binding,protein binding	mRNA splicing, via spliceosome,termination of RNA polymerase II transcription,mRNA processing,RNA export from nucleus,mRNA export from nucleus,RNA splicing,mRNA 3'-end processing
1.82672	0.00251216	0.00151551	Q9C099	LRRCC1	Leucine-rich repeat and coiled-coil domain-containing protein 1	LRCC1_HUMAN	1	centrosome,centriole		cell cycle,cell division
1.8177	2.97229e-19	1.21617e-18	Q8IWZ8	SUGP1	SURP and G-patch domain-containing protein 1	SUGP1_HUMAN	22	nucleoplasm,spliceosomal complex	RNA binding,protein binding	mRNA splicing, via spliceosome
1.81581	3.55895e-08	4.86486e-08	Q8NE35	CPEB3	Cytoplasmic polyadenylation element-binding protein 3	CPEB3_HUMAN	12	nucleus,cytoplasm,postsynaptic density,CCR4-NOT complex,cell junction,dendrite,neuron projection,synapse,postsynaptic membrane,apical dendrite,messenger ribonucleoprotein complex	translation repressor activity, nucleic acid binding,RNA binding,mRNA 3'-UTR binding,protein binding,translation factor activity, RNA binding,RNA stem-loop binding,mRNA 3'-UTR AU-rich region binding,ribosome binding	negative regulation of transcription from RNA polymerase II promoter,translation,long-term memory,negative regulation of translation,positive regulation of translation,regulation of synaptic plasticity,positive regulation of nuclear-transcribed mRNA poly(A) tail shortening,regulation of dendritic spine development,positive regulation of dendritic spine development,3'-UTR-mediated mRNA destabiliza…
1.80733	0.0777694	0.0305573	Q92882	OSTF1	Osteoclast-stimulating factor 1	OSTF1_HUMAN	1	extracellular region,intracellular,secretory granule lumen,extracellular exosome,ficolin-1-rich granule lumen	protein binding,SH3 domain binding	ossification,signal transduction,neutrophil degranulation
1.79987	0.601975	0.171342	O75607	NPM3	Nucleoplasmin-3	NPM3_HUMAN	1	nucleolus,cytosol,actin cytoskeleton	RNA binding,protein binding	rRNA processing,rRNA transcription
1.79288	0.868274	0.229537	Q9UKX3	MYH13	Myosin-13	MYH13_HUMAN	1	muscle myosin complex,myofibril,myosin filament,extracellular exosome	microfilament motor activity,calmodulin binding,ATP binding,actin filament binding	muscle contraction
1.78466	3.99123e-09	6.11511e-09	Q8WVY7	UBLCP1	Ubiquitin-like domain-containing CTD phosphatase 1	UBCP1_HUMAN	18	nucleus,nucleolus	protein serine/threonine phosphatase activity,protein binding	protein dephosphorylation
1.78266	0.00572543	0.00315721	Q9H892	TTC12	Tetratricopeptide repeat protein 12	TTC12_HUMAN	2	centrosome
1.76957	1.9284e-05	1.76893e-05	Q5T5X7	BEND3	BEN domain-containing protein 3	BEND3_HUMAN	7	nucleoplasm,nuclear heterochromatin,nucleolus	rDNA binding,protein binding	negative regulation of transcription from RNA polymerase II promoter,chromatin silencing at rDNA,DNA methylation,transcription, DNA-templated,histone H4-K20 trimethylation,histone H3-K9 trimethylation,histone H4 acetylation,protein homooligomerization,histone H3-K4 trimethylation,histone H3-K27 trimethylation,positive regulation of ATP metabolic process
1.76797	0.022696	0.0105202	A8MVW0	FAM171A2	Protein FAM171A2	F1712_HUMAN	2	integral component of membrane
1.76459	0.0663929	0.0266851	Q9P2L0	WDR35	WD repeat-containing protein 35	WDR35_HUMAN	1	centrosome,cilium,axoneme,intraciliary transport particle A,ciliary basal body,ciliary tip	phosphatidylinositol binding	response to toxic substance,negative regulation of gene expression,response to lipopolysaccharide,intraciliary retrograde transport,intraciliary transport involved in cilium morphogenesis,positive regulation of cysteine-type endopeptidase activity involved in apoptotic process,negative regulation of nitric oxide biosynthetic process,cilium morphogenesis,protein localization to cilium,cellular res…
1.76232	0.0302602	0.0134544	P16383	GCFC2	GC-rich sequence DNA-binding factor 2	GCFC2_HUMAN	5	nucleus,nucleoplasm,nucleolus,cytosol,U2-type post-mRNA release spliceosomal complex	RNA polymerase II core promoter proximal region sequence-specific DNA binding,transcriptional repressor activity, RNA polymerase II core promoter proximal region sequence-specific binding,protein binding	negative regulation of transcription from RNA polymerase II promoter,spliceosomal complex assembly,mRNA splicing, via spliceosome,transcription, DNA-templated,regulation of transcription, DNA-templated,negative regulation of transcription, DNA-templated
1.75799	8.78878e-08	1.14577e-07	Q9NQC7	CYLD	Ubiquitin carboxyl-terminal hydrolase CYLD	CYLD_HUMAN	9	centrosome,spindle,cytosol,extrinsic component of cytoplasmic side of plasma membrane,ciliary basal body,perinuclear region of cytoplasm,ciliary tip,cytoplasmic microtubule,midbody	thiol-dependent ubiquitin-specific protease activity,protein binding,zinc ion binding,protein kinase binding,thiol-dependent ubiquitinyl hydrolase activity,Lys63-specific deubiquitinase activity,proline-rich region binding,Lys48-specific deubiquitinase activity,structural constituent of ribosome	ubiquitin-dependent protein catabolic process,cell cycle,regulation of mitotic cell cycle,regulation of tumor necrosis factor-mediated signaling pathway,Wnt signaling pathway,protein deubiquitination,negative regulation of NF-kappaB transcription factor activity,negative regulation of type I interferon production,negative regulation of NF-kappaB import into nucleus,CD4-positive or CD8-positive, a…
1.75542	2.4564e-21	1.16535e-20	Q96EA4	SPDL1	Protein Spindly	SPDLY_HUMAN	14	spindle pole,condensed chromosome outer kinetochore,nucleus,microtubule organizing center,cytosol	protein binding,enzyme binding,kinetochore binding	establishment of mitotic spindle orientation,sister chromatid cohesion,mitotic metaphase plate congression,spindle checkpoint,protein localization to kinetochore,cell division
1.75521	0.0292361	0.0130794	Q86VW0	SESTD1	SEC14 domain and spectrin repeat-containing protein 1	SESD1_HUMAN	1	intermediate filament cytoskeleton,calcium channel complex	protein binding,phosphatidylinositol-4,5-bisphosphate binding,phosphatidylinositol-5-phosphate binding,phosphatidylinositol-3-phosphate binding,phosphatidylinositol-3,4-bisphosphate binding,phosphatidylinositol-4-phosphate binding,phosphatidic acid binding,phosphatidylinositol-3,5-bisphosphate binding,phosphatidylserine binding,1-phosphatidylinositol binding,phosphatidylcholine binding	negative regulation of calcium ion transmembrane transport via high voltage-gated calcium channel
1.75065	4.14648e-11	8.07009e-11	Q99856	ARID3A	AT-rich interactive domain-containing protein 3A	ARI3A_HUMAN	12	nucleus,nucleoplasm,cytosol,intracellular membrane-bounded organelle,membrane raft	RNA polymerase II regulatory region sequence-specific DNA binding,transcriptional activator activity, RNA polymerase II transcription regulatory region sequence-specific binding,chromatin binding,protein binding,protein homodimerization activity	transcription from RNA polymerase II promoter,DNA damage response, signal transduction by p53 class mediator resulting in cell cycle arrest,positive regulation of transcription from RNA polymerase II promoter
1.74848	9.7251e-70	3.77019e-68	Q5VUA4	ZNF318	Zinc finger protein 318	ZN318_HUMAN	57	nucleoplasm,cytosol	nucleic acid binding,zinc ion binding,protein homodimerization activity	transcription, DNA-templated,negative regulation of transcription, DNA-templated,positive regulation of transcription, DNA-templated,meiotic cell cycle
1.74763	3.20608e-05	2.84705e-05	Q9BQ61	C19orf43	Uncharacterized protein C19orf43	CS043_HUMAN	3		RNA binding,protein binding,3'-5' exonuclease activity,5'-3' exonuclease activity	rRNA catabolic process,RNA phosphodiester bond hydrolysis, exonucleolytic
1.74712	0.000153989	0.000120639	Q9UKE5	TNIK	TRAF2 and NCK-interacting protein kinase	TNIK_HUMAN	6	nucleus,nucleoplasm,cytoplasm,cytosol,cytoskeleton,apical plasma membrane,recycling endosome,extracellular exosome	protein kinase activity,protein serine/threonine kinase activity,protein binding,ATP binding,MAP kinase kinase kinase kinase activity	activation of MAPKKK activity,positive regulation of protein phosphorylation,protein phosphorylation,cytoskeleton organization,activation of JNKK activity,regulation of mitotic cell cycle,Wnt signaling pathway,microvillus assembly,actin cytoskeleton reorganization,intracellular signal transduction,regulation of apoptotic process,protein autophosphorylation,regulation of dendrite morphogenesis,pro…
1.74501	0.00471329	0.00265205	Q96D09	GPRASP2	G-protein coupled receptor-associated sorting protein 2	GASP2_HUMAN	6	cytoplasm	beta-amyloid binding,protein binding
1.74253	0.0589799	0.024066	Q2M1K9;Q96K83	ZNF423;ZNF521	Zinc finger protein 423;Zinc finger protein 521	ZN423_HUMAN;ZN521_HUMAN	1	nucleus,nucleoplasm;nucleus	DNA binding,protein binding,metal ion binding;DNA binding,protein domain specific binding,metal ion binding	transcription, DNA-templated,Notch signaling pathway,nervous system development,cell differentiation,positive regulation of BMP signaling pathway,negative regulation of transcription, DNA-templated,positive regulation of transcription, DNA-templated;transcription, DNA-templated,regulation of transcription, DNA-templated,neuron fate commitment
1.74081	3.29131e-05	2.91868e-05	P49366	DHPS	Deoxyhypusine synthase	DHYS_HUMAN	4	cytoplasm,cytosol	protein binding,deoxyhypusine synthase activity,identical protein binding	translation,spermidine metabolic process,positive regulation of cell proliferation,peptidyl-lysine modification to peptidyl-hypusine,positive regulation of T cell proliferation,glucose homeostasis,spermidine catabolic process,protein homotetramerization
1.73777	0.0194691	0.00920795	Q15435	PPP1R7	Protein phosphatase 1 regulatory subunit 7	PP1R7_HUMAN	1	nucleus,chromosome,cytoplasm,extracellular exosome	protein binding,protein phosphatase regulator activity,enzyme regulator activity	chromosome segregation,biological_process,positive regulation of protein dephosphorylation,regulation of phosphoprotein phosphatase activity
1.73515	0.0233732	0.0107963	O14893	GEMIN2	Gem-associated protein 2	GEMI2_HUMAN	3	nucleus,nucleoplasm,spliceosomal complex,nucleolus,cytosol,nuclear body,SMN complex,SMN-Sm protein complex,Gemini of coiled bodies	protein binding	spliceosomal complex assembly,RNA splicing, via transesterification reactions,spliceosomal snRNP assembly,mRNA processing,RNA splicing,nuclear import
1.72699	0.141557	0.050937	Q08495	DMTN	Dematin	DEMA_HUMAN	2	cytosol,actin filament,plasma membrane,endomembrane system,postsynaptic density,spectrin-associated cytoskeleton,actin cytoskeleton,cortical cytoskeleton,platelet dense tubular network membrane,cell projection membrane,cytoplasmic vesicle,perinuclear region of cytoplasm	actin binding,receptor binding,protein binding,spectrin binding,protein self-association	protein complex assembly,cytoskeleton organization,regulation of cell shape,regulation of lamellipodium assembly,positive regulation of fibroblast migration,negative regulation of peptidyl-threonine phosphorylation,negative regulation of cell-substrate adhesion,actin cytoskeleton organization,positive regulation of blood coagulation,regulation of actin cytoskeleton organization,negative regulatio…
1.72488	0.579883	0.166287	P22415;Q15853	USF1;USF2	Upstream stimulatory factor 1;Upstream stimulatory factor 2	USF1_HUMAN;USF2_HUMAN	1	nuclear chromatin,nucleus,nucleoplasm,transcription factor complex,NURF complex,Set1C/COMPASS complex;nucleus,nucleoplasm,intracellular membrane-bounded organelle	double-stranded DNA binding,transcription factor activity, RNA polymerase II distal enhancer sequence-specific binding,protein binding,enzyme binding,protein kinase binding,identical protein binding,protein homodimerization activity,histone deacetylase binding,bHLH transcription factor binding,sequence-specific DNA binding,protein heterodimerization activity;transcription factor activity, sequenc…	regulation of transcription from RNA polymerase II promoter by glucose,positive regulation of transcription from RNA polymerase II promoter by glucose,response to hypoxia,glucose metabolic process,regulation of transcription from RNA polymerase II promoter,transcription from RNA polymerase II promoter,response to UV,late viral transcription,cellular response to insulin stimulus,glucose homeostasi…
1.71472	1.89369e-06	2.03642e-06	P78312	FAM193A	Protein FAM193A	F193A_HUMAN	11
1.71255	0.00278234	0.00166282	O00273	DFFA	DNA fragmentation factor subunit alpha	DFFA_HUMAN	3	nuclear chromatin,nucleus,nucleoplasm,cytosol,plasma membrane,lipid particle	protein binding,protein domain specific binding,protein binding involved in protein folding,deoxyribonuclease inhibitor activity	apoptotic DNA fragmentation,negative regulation of deoxyribonuclease activity,positive regulation of apoptotic process,chaperone-mediated protein folding,thymocyte apoptotic process,negative regulation of execution phase of apoptosis,negative regulation of apoptotic DNA fragmentation
1.69537	0.180315	0.0625778	P0CG24	ZNF883	Zinc finger protein 883	ZN883_HUMAN	2	nucleus	DNA binding,transcription factor activity, sequence-specific DNA binding,metal ion binding	transcription, DNA-templated,regulation of transcription, DNA-templated
1.69353	9.90426e-13	2.30239e-12	Q9BZF3	OSBPL6	Oxysterol-binding protein-related protein 6	OSBL6_HUMAN	9	endoplasmic reticulum membrane,cytosol,plasma membrane,nuclear membrane,perinuclear endoplasmic reticulum	protein binding,lipid binding,sterol transporter activity	bile acid biosynthetic process,sterol transport
1.69228	0.237891	0.0791321	Q6YP21	CCBL2	Kynurenine--oxoglutarate transaminase 3	KAT3_HUMAN	2	mitochondrion	RNA binding,kynurenine-oxoglutarate transaminase activity,pyridoxal phosphate binding,protein homodimerization activity,kynurenine-glyoxylate transaminase activity,cysteine-S-conjugate beta-lyase activity	2-oxoglutarate metabolic process,cellular amino acid metabolic process,biosynthetic process,kynurenine metabolic process,L-kynurenine metabolic process
1.69178	5.31462e-10	9.0817e-10	Q9NRY5	FAM114A2	Protein FAM114A2	F1142_HUMAN	11	cellular_component	purine nucleotide binding	biological_process
1.69137	0.0286375	0.0128415	Q13948	CUX1	Protein CASP	CASP_HUMAN	1
1.68933	3.72918e-05	3.27669e-05	P37840	SNCA	Alpha-synuclein	SYUA_HUMAN	3	extracellular region,extracellular space,nucleus,nuclear outer membrane,cytoplasm,mitochondrion,lysosome,rough endoplasmic reticulum,Golgi apparatus,cytosol,ribosome,plasma membrane,cell cortex,synaptic vesicle,actin cytoskeleton,membrane,inclusion body,cell junction,axon,growth cone,neuronal cell body,terminal bouton,perinuclear region of cytoplasm,postsynapse,supramolecular fiber,mitochondrial …	magnesium ion binding,copper ion binding,calcium ion binding,protein binding,phospholipid binding,microtubule binding,ferrous iron binding,zinc ion binding,oxidoreductase activity,kinesin binding,protein domain specific binding,Hsp70 protein binding,histone binding,identical protein binding,alpha-tubulin binding,cysteine-type endopeptidase inhibitor activity involved in apoptotic process,phosphol…	negative regulation of transcription from RNA polymerase II promoter,microglial cell activation,positive regulation of receptor recycling,negative regulation of protein phosphorylation,positive regulation of neurotransmitter secretion,fatty acid metabolic process,neutral lipid metabolic process,phospholipid metabolic process,apoptotic process,activation of cysteine-type endopeptidase activity inv…
1.68834	0.00821819	0.00434335	Q8IXH7	NELFCD	Negative elongation factor C/D	NELFD_HUMAN	3	nucleoplasm,membrane,NELF complex	RNA binding,protein binding	transcription from RNA polymerase II promoter,transcription elongation from RNA polymerase II promoter,negative regulation of transcription, DNA-templated,positive regulation of viral transcription
1.68648	2.13206e-06	2.27364e-06	Q8IXQ4	GPALPP1	GPALPP motifs-containing protein 1	GPAM1_HUMAN	2
1.68371	1.1619e-07	1.49393e-07	Q96ES7	SGF29	SAGA-associated factor 29	SGF29_HUMAN	4	Ada2/Gcn5/Ada3 transcription activator complex,SAGA-type complex	protein binding,enzyme binding,methylated histone binding,protein N-terminus binding	transcription, DNA-templated,regulation of transcription, DNA-templated,histone acetylation,histone H3 acetylation,establishment of protein localization to chromatin
1.68368	4.60379e-11	8.89248e-11	Q9UPN7	PPP6R1	Serine/threonine-protein phosphatase 6 regulatory subunit 1	PP6R1_HUMAN	11	Golgi membrane,cytosol	protein binding,Rho GTPase binding,protein phosphatase binding	regulation of phosphoprotein phosphatase activity,COPII vesicle coating
1.67584	0.0917907	0.0352011	Q9Y385	UBE2J1	Ubiquitin-conjugating enzyme E2 J1	UB2J1_HUMAN	1	cytoplasm,endoplasmic reticulum membrane,integral component of membrane	ATP binding,ubiquitin protein ligase binding,ubiquitin protein ligase activity,ubiquitin conjugating enzyme activity	spermatid development,protein ubiquitination,protein N-linked glycosylation via asparagine,ER-associated ubiquitin-dependent protein catabolic process,regulation of tumor necrosis factor biosynthetic process,negative regulation of retrograde protein transport, ER to cytosol
1.67489	2.85618e-09	4.45249e-09	Q9P2D6	FAM135A	Protein FAM135A	F135A_HUMAN	8		carboxylic ester hydrolase activity	cellular lipid metabolic process
1.66811	0.0106413	0.00544407	Q9BW71	HIRIP3	HIRA-interacting protein 3	HIRP3_HUMAN	2	nucleus,nucleolus	protein binding	chromatin assembly or disassembly
1.66781	0.164445	0.0578708	Q9BSG1	ZNF2	Zinc finger protein 2	ZNF2_HUMAN	2	nucleus	DNA binding,transcription factor activity, sequence-specific DNA binding,zinc ion binding	transcription, DNA-templated,regulation of transcription, DNA-templated
1.66772	3.03993e-06	3.17477e-06	Q14191	WRN	Werner syndrome ATP-dependent helicase	WRN_HUMAN	7	chromosome, telomeric region,nucleoplasm,replication fork,nucleolus,cytoplasm,centrosome,nuclear speck,neuron projection,MutLalpha complex	magnesium ion binding,four-way junction DNA binding,Y-form DNA binding,bubble DNA binding,DNA binding,DNA helicase activity,chromatin binding,ATP-dependent DNA helicase activity,helicase activity,exonuclease activity,protein binding,ATP binding,3'-5' exonuclease activity,four-way junction helicase activity,ATPase activity,manganese ion binding,protein complex binding,protein homodimerization acti…	telomere maintenance,double-strand break repair via homologous recombination,DNA synthesis involved in DNA repair,strand displacement,replicative cell aging,DNA metabolic process,DNA replication,base-excision repair,double-strand break repair,cellular response to DNA damage stimulus,response to oxidative stress,brain development,aging,cell aging,cellular response to starvation,response to UV-C,mu…
1.6674	1.36957e-13	3.47876e-13	O15084	ANKRD28	Serine/threonine-protein phosphatase 6 regulatory ankyrin repeat subunit A	ANR28_HUMAN	19	Golgi membrane,nucleoplasm,cytosol	protein binding	COPII vesicle coating
1.66363	0.0166895	0.00807035	Q16533	SNAPC1	snRNA-activating protein complex subunit 1	SNPC1_HUMAN	1	nucleus,nucleoplasm,nucleolus,snRNA-activating protein complex	sequence-specific DNA binding	regulation of transcription, DNA-templated,snRNA transcription from RNA polymerase II promoter,snRNA transcription from RNA polymerase III promoter
1.65913	1.16762e-05	1.10677e-05	O75150	RNF40	E3 ubiquitin-protein ligase BRE1B	BRE1B_HUMAN	6	ubiquitin ligase complex,nucleus,nucleoplasm,cytosol,membrane,extrinsic component of membrane,HULC complex,neuron projection,axon terminus	mRNA 3'-UTR binding,protein binding,syntaxin-1 binding,ubiquitin conjugating enzyme binding,ubiquitin protein ligase binding,protein complex binding,protein homodimerization activity,metal ion binding,ubiquitin-protein transferase activity	ubiquitin-dependent protein catabolic process,histone monoubiquitination,protein ubiquitination,histone H2B ubiquitination,response to peptide hormone,negative regulation of mRNA polyadenylation,positive regulation of proteasomal protein catabolic process,positive regulation of protein polyubiquitination,positive regulation of histone H2B ubiquitination,regulation of mitotic cell cycle
1.65876	0.00436265	0.00247983	Q8N1W1	ARHGEF28	Rho guanine nucleotide exchange factor 28	ARG28_HUMAN	3	cytosol,plasma membrane	RNA binding,guanyl-nucleotide exchange factor activity,Rho guanyl-nucleotide exchange factor activity,metal ion binding	cell differentiation,regulation of Rho protein signal transduction,intracellular signal transduction,ephrin receptor signaling pathway,regulation of molecular function
1.65103	1.46498e-08	2.09485e-08	Q8IZ21	PHACTR4	Phosphatase and actin regulator 4	PHAR4_HUMAN	8	cytoplasm,lamellipodium	actin binding,protein phosphatase 1 binding,protein phosphatase activator activity	neural crest cell migration,neural tube closure,Rho protein signal transduction,actin cytoskeleton organization,positive regulation of catalytic activity,regulation of phosphoprotein phosphatase activity,enteric nervous system development,regulation of cell cycle,closure of optic fissure,negative regulation of integrin-mediated signaling pathway
1.64786	0.077531	0.0304819	Q8IVT5	KSR1	Kinase suppressor of Ras 1	KSR1_HUMAN	2	endoplasmic reticulum,endoplasmic reticulum membrane,cytosol,membrane,ruffle membrane,protein complex	protein kinase activity,signal transducer activity,MAP-kinase scaffold activity,protein binding,ATP binding,protein C-terminus binding,mitogen-activated protein kinase kinase binding,metal ion binding,chaperone binding,Hsp90 protein binding,14-3-3 protein binding	MAPK cascade,protein phosphorylation,Ras protein signal transduction,cAMP-mediated signaling,positive regulation of MAPK cascade
1.64782	3.02869e-08	4.18133e-08	Q9NVX0	HAUS2	HAUS augmin-like complex subunit 2	HAUS2_HUMAN	5	centrosome,cytosol,spindle microtubule,HAUS complex	molecular_function,protein binding	G2/M transition of mitotic cell cycle,centrosome cycle,regulation of G2/M transition of mitotic cell cycle,spindle assembly,cell division,ciliary basal body docking
1.64533	0.532212	0.154991	O94972	TRIM37	E3 ubiquitin-protein ligase TRIM37	TRI37_HUMAN	1	cytoplasm,peroxisome,cytosol,aggresome,perinuclear region of cytoplasm,ESC/E(Z) complex	chromatin binding,ubiquitin-protein transferase activity,tumor necrosis factor receptor binding,protein binding,zinc ion binding,ubiquitin protein ligase binding,protein homodimerization activity,ubiquitin protein ligase activity	negative regulation of transcription from RNA polymerase II promoter,transcription, DNA-templated,negative regulation of NF-kappaB transcription factor activity,histone H2A monoubiquitination,histone H2A-K119 monoubiquitination,negative regulation of centriole replication,positive regulation of sequence-specific DNA binding transcription factor activity,positive regulation of NF-kappaB transcript…
1.64365	2.22474e-08	3.11592e-08	Q96RG2	PASK	PAS domain-containing serine/threonine-protein kinase	PASK_HUMAN	12	nucleus,cytoplasm,cytosol	protein serine/threonine kinase activity,protein binding,ATP binding,phosphatidylinositol binding	protein phosphorylation,regulation of respiratory gaseous exchange,negative regulation of glycogen biosynthetic process,positive regulation of translation,protein autophosphorylation,regulation of glucagon secretion,regulation of energy homeostasis
1.6433	8.77949e-06	8.50901e-06	O75170	PPP6R2	Serine/threonine-protein phosphatase 6 regulatory subunit 2	PP6R2_HUMAN	7	cytosol,intracellular membrane-bounded organelle	protein binding
1.64256	0.00120232	0.000785717	Q06546	GABPA	GA-binding protein alpha chain	GABPA_HUMAN	3	nuclear chromatin,nucleus,nucleoplasm	RNA polymerase II core promoter proximal region sequence-specific DNA binding,transcriptional activator activity, RNA polymerase II core promoter proximal region sequence-specific binding,transcriptional activator activity, RNA polymerase II transcription regulatory region sequence-specific binding,DNA binding,chromatin binding,transcription factor activity, sequence-specific DNA binding,transcri…	negative regulation of transcription from RNA polymerase II promoter,in utero embryonic development,transcription from RNA polymerase II promoter,mitochondrion organization,positive regulation of gene expression,cell differentiation,negative regulation of megakaryocyte differentiation,positive regulation of transcription from RNA polymerase II promoter,cellular response to dopamine
1.63962	0.19387	0.0665122	Q9C0B5	ZDHHC5	Palmitoyltransferase ZDHHC5	ZDHC5_HUMAN	2	cytoplasm,plasma membrane,membrane,integral component of membrane,dendrite	palmitoyltransferase activity,protein-cysteine S-palmitoyltransferase activity	protein palmitoylation
1.63448	1.98899e-14	5.54376e-14	P42166	TMPO	Lamina-associated polypeptide 2, isoform alpha	LAP2A_HUMAN	24	chromatin,nucleus,nuclear envelope	DNA binding,lamin binding,cadherin binding	regulation of transcription, DNA-templated
1.62635	0.223953	0.0751534	Q8IZ69	TRMT2A	tRNA (uracil-5-)-methyltransferase homolog A	TRM2A_HUMAN	2		RNA binding,RNA methyltransferase activity	RNA methylation,RNA processing
1.62539	0.0712863	0.0283961	O75132	ZBED4	Zinc finger BED domain-containing protein 4	ZBED4_HUMAN	2	nucleus,nucleoplasm,cytoplasm	RNA polymerase II regulatory region sequence-specific DNA binding,transcription factor activity, sequence-specific DNA binding,protein binding,metal ion binding,protein dimerization activity	regulation of transcription from RNA polymerase II promoter
1.62528	0.00856846	0.00451293	Q9BR76	CORO1B	Coronin-1B	COR1B_HUMAN	13	stress fiber,cytoplasm,cytosol,actin filament,plasma membrane,focal adhesion,lamellipodium,cell leading edge,perinuclear region of cytoplasm,extracellular exosome,cell periphery	protein binding,identical protein binding,cadherin binding,actin filament binding,Arp2/3 complex binding	cell migration,actin cytoskeleton organization,ruffle organization,regulation of Arp2/3 complex-mediated actin nucleation,negative regulation of Arp2/3 complex-mediated actin nucleation,endothelial cell chemotaxis,cellular response to platelet-derived growth factor stimulus,wound healing,actin filament bundle assembly,negative regulation of smooth muscle cell chemotaxis,actin filament branching,p…
1.62417	1.04783e-15	3.26692e-15	Q15208	STK38	Serine/threonine-protein kinase 38	STK38_HUMAN	13	nucleus,cytoplasm,cytosol	magnesium ion binding,protein serine/threonine kinase activity,protein binding,ATP binding,mitogen-activated protein kinase kinase kinase binding,cadherin binding	cellular protein modification process,protein phosphorylation,peptidyl-serine phosphorylation,intracellular signal transduction,negative regulation of MAP kinase activity
1.61846	3.64406e-08	4.97365e-08	Q15545	TAF7	Transcription initiation factor TFIID subunit 7	TAF7_HUMAN	9	nucleoplasm,transcription factor TFIID complex,Golgi apparatus,transcription factor TFTC complex,MLL1 complex,cyclin/CDK positive transcription elongation factor complex	transcription coactivator activity,protein binding,transcription factor binding,histone acetyltransferase binding,vitamin D receptor binding,transcription regulatory region DNA binding,thyroid hormone receptor binding,protein heterodimerization activity,transcription factor activity, sequence-specific DNA binding,H3K27me3 modified histone binding	negative regulation of transcription from RNA polymerase II promoter,spermine transport,DNA-templated transcription, initiation,transcription from RNA polymerase II promoter,transcription initiation from RNA polymerase II promoter,transcription elongation from RNA polymerase II promoter,negative regulation of protein kinase activity,intracellular estrogen receptor signaling pathway,negative regul…
1.61836	0.0745937	0.0295236	P03915	MT-ND5	NADH-ubiquinone oxidoreductase chain 5	NU5M_HUMAN	1	mitochondrial inner membrane,mitochondrial respiratory chain complex I,integral component of membrane,neuron projection	NADH dehydrogenase (ubiquinone) activity	response to hypoxia,mitochondrial electron transport, NADH to ubiquinone,response to organonitrogen compound,mitochondrial respiratory chain complex I assembly,response to hydrogen peroxide
1.61561	0.267724	0.0873448	Q8WV60	PTCD2	Pentatricopeptide repeat-containing protein 2, mitochondrial	PTCD2_HUMAN	1	mitochondrion	RNA binding	kidney development,liver development,mRNA processing,mitochondrion organization,muscle fiber development,regulation of mRNA processing,ventricular cardiac muscle tissue morphogenesis
1.61384	1.27605e-06	1.40773e-06	Q06323	PSME1	Proteasome activator complex subunit 1	PSME1_HUMAN	5	proteasome complex,nucleoplasm,cytoplasm,cytosol,proteasome activator complex,extracellular exosome	protein binding,endopeptidase activator activity	MAPK cascade,protein polyubiquitination,stimulatory C-type lectin receptor signaling pathway,antigen processing and presentation of exogenous peptide antigen via MHC class I, TAP-dependent,regulation of cellular amino acid metabolic process,positive regulation of endopeptidase activity,negative regulation of G2/M transition of mitotic cell cycle,protein deubiquitination,anaphase-promoting complex…
1.61154	0.000787641	0.000536748	P52739	ZNF131	Zinc finger protein 131	ZN131_HUMAN	2	nucleus,nucleoplasm,intermediate filament cytoskeleton	RNA polymerase II transcription factor activity, sequence-specific DNA binding,DNA binding,transcription factor activity, sequence-specific DNA binding,metal ion binding	transcription, DNA-templated,regulation of transcription, DNA-templated,regulation of transcription from RNA polymerase II promoter
1.60957	0.00141016	0.000906564	Q9Y597	KCTD3	BTB/POZ domain-containing protein KCTD3	KCTD3_HUMAN	3	plasma membrane		protein homooligomerization
1.60821	0.0238562	0.0109916	Q9UBK9	UXT	Protein UXT	UXT_HUMAN	3	spindle pole,nucleus,nucleoplasm,cytoplasm,centrosome,cytoskeleton,gamma-tubulin complex	RNA polymerase II transcription corepressor activity,chromatin binding,protein binding,microtubule binding,beta-tubulin binding,actin filament binding	negative regulation of transcription from RNA polymerase II promoter,microtubule cytoskeleton organization,transcription, DNA-templated,apoptotic process,centrosome cycle,mitochondrion transport along microtubule,negative regulation of G0 to G1 transition
1.60675	0.000939201	0.000628246	P29317	EPHA2	Ephrin type-A receptor 2	EPHA2_HUMAN	7	intracellular,plasma membrane,integral component of plasma membrane,focal adhesion,cell surface,lamellipodium,leading edge membrane,lamellipodium membrane,ruffle membrane	virus receptor activity,transmembrane receptor protein tyrosine kinase activity,ephrin receptor activity,protein binding,ATP binding,cadherin binding	angiogenesis,osteoblast differentiation,cell adhesion,multicellular organism development,intrinsic apoptotic signaling pathway in response to DNA damage,regulation of lamellipodium assembly,cell migration,peptidyl-tyrosine phosphorylation,keratinocyte differentiation,osteoclast differentiation,mammary gland epithelial cell proliferation,regulation of cell adhesion mediated by integrin,protein kin…
1.60023	0.0988858	0.037506	Q9UKQ2	ADAM28	Disintegrin and metalloproteinase domain-containing protein 28	ADA28_HUMAN	1	extracellular region,mitochondrion,plasma membrane,integral component of membrane	metalloendopeptidase activity,metallopeptidase activity,metal ion binding	proteolysis,spermatogenesis
1.59647	1.44549e-07	1.8358e-07	Q0PNE2	ELP6	Elongator complex protein 6	ELP6_HUMAN	9	Elongator holoenzyme complex	molecular_function	tRNA wobble uridine modification,transcription, DNA-templated,regulation of transcription, DNA-templated,biological_process,positive regulation of cell migration
1.59642	0.100418	0.0379937	Q8N5S9	CAMKK1	Calcium/calmodulin-dependent protein kinase kinase 1	KKCC1_HUMAN	2	nucleus,cytoplasm,cytosol	calmodulin-dependent protein kinase activity,protein binding,calmodulin binding,ATP binding	peptidyl-serine phosphorylation,peptidyl-threonine phosphorylation,intracellular signal transduction,positive regulation of protein kinase activity
1.59576	9.19818e-12	1.91031e-11	Q8NHV4	NEDD1	Protein NEDD1	NEDD1_HUMAN	13	pericentriolar material,spindle pole,centrosome,centriole,cytosol,ciliary basal body,apical part of cell	protein binding	G2/M transition of mitotic cell cycle,regulation of G2/M transition of mitotic cell cycle,cell division,protein localization to centrosome,ciliary basal body docking
1.58874	0.400293	0.122154	Q9C0E2	XPO4	Exportin-4	XPO4_HUMAN	1	nuclear pore,nucleoplasm,cytoplasm,cytosol	nuclear export signal receptor activity,protein binding,Ran GTPase binding	protein export from nucleus,positive regulation of protein export from nucleus
1.58138	7.05929e-15	2.04018e-14	O75832	PSMD10	26S proteasome non-ATPase regulatory subunit 10	PSD10_HUMAN	12	proteasome complex,nucleus,nucleoplasm,cytoplasm,cytosol,proteasome regulatory particle,intermediate filament cytoskeleton,proteasome regulatory particle, base subcomplex	protein binding,transcription factor binding	negative regulation of transcription from RNA polymerase II promoter,MAPK cascade,protein polyubiquitination,stimulatory C-type lectin receptor signaling pathway,antigen processing and presentation of exogenous peptide antigen via MHC class I, TAP-dependent,regulation of cellular amino acid metabolic process,apoptotic process,cytoplasmic sequestering of NF-kappaB,negative regulation of G2/M trans…
1.57937	0.0421455	0.0180082	Q9H0W5	CCDC8	Coiled-coil domain-containing protein 8	CCDC8_HUMAN	2	nucleus,cytoplasm,centrosome,cytosol,plasma membrane,3M complex	protein binding	microtubule cytoskeleton organization,regulation of mitotic nuclear division,negative regulation of phosphatase activity,post-translational protein modification
1.57936	0.0216712	0.0101074	Q6P6B1	ERICH5	Glutamate-rich protein 5	ERIC5_HUMAN	1
1.57506	0.00339001	0.00198084	Q9UJ41	RABGEF1	Rab5 GDP/GTP exchange factor	RABX5_HUMAN	4	nucleolus,early endosome,cytosol,early endosome membrane,recycling endosome	DNA binding,protein binding,zinc ion binding,Rab guanyl-nucleotide exchange factor activity,Rab GTPase binding	protein targeting to membrane,endocytosis,regulation of molecular function
1.57382	0.0224258	0.0104113	Q9HB21	PLEKHA1	Pleckstrin homology domain-containing family A member 1	PKHA1_HUMAN	5	nucleus,nucleoplasm,cytoplasm,cytosol,plasma membrane,ruffle membrane,extracellular exosome	protein binding,PDZ domain binding,phosphatidylinositol-3,4-bisphosphate binding	luteinization,phosphatidylinositol biosynthetic process,spermatogenesis,androgen metabolic process,estrogen metabolic process,post-embryonic development,phosphatidylinositol 3-kinase signaling,ruffle organization,Leydig cell differentiation,multicellular organism growth,establishment of protein localization,platelet-derived growth factor receptor signaling pathway,skeletal system morphogenesis,B …
1.57355	0.0192086	0.00910379	Q12933	TRAF2	TNF receptor-associated factor 2	TRAF2_HUMAN	2	ubiquitin ligase complex,nucleoplasm,cytosol,cell cortex,cytoplasmic side of plasma membrane,vesicle membrane,CD40 receptor complex,membrane raft,TRAF2-GSTP1 complex,AIP1-IRE1 complex,IRE1-TRAF2-ASK1 complex	ubiquitin-protein transferase activity,signal transducer activity,tumor necrosis factor receptor binding,CD40 receptor binding,protein binding,zinc ion binding,enzyme binding,protein kinase binding,protein phosphatase binding,mitogen-activated protein kinase kinase kinase binding,ubiquitin protein ligase binding,thioesterase binding,protein complex binding,identical protein binding,sphingolipid b…	positive regulation of T cell cytokine production,protein complex assembly,activation of cysteine-type endopeptidase activity involved in apoptotic process,signal transduction,I-kappaB kinase/NF-kappaB signaling,activation of NF-kappaB-inducing kinase activity,regulation of tumor necrosis factor-mediated signaling pathway,protein deubiquitination,protein catabolic process,positive regulation of i…
1.57137	0.00303149	0.0017908	Q6P1R3	MSANTD2	Myb/SANT-like DNA-binding domain-containing protein 2	MSD2_HUMAN	1
1.56756	6.63771e-14	1.74371e-13	Q86XP3	DDX42	ATP-dependent RNA helicase DDX42	DDX42_HUMAN	20	nucleus,nucleoplasm,nucleolus,cytoplasm,cytosol,Cajal body,membrane,nuclear speck	RNA binding,ATP-dependent RNA helicase activity,protein binding,ATP binding	mRNA splicing, via spliceosome,protein localization,RNA secondary structure unwinding,regulation of apoptotic process
1.56188	0.0133193	0.00662332	O95644	NFATC1	Nuclear factor of activated T-cells, cytoplasmic 1	NFAC1_HUMAN	4	nuclear chromatin,nucleus,nucleoplasm,cytoplasm,cytosol,nuclear body	RNA polymerase II distal enhancer sequence-specific DNA binding,RNA polymerase II transcription factor binding,transcriptional activator activity, RNA polymerase II distal enhancer sequence-specific binding,RNA polymerase II transcription coactivator binding,transcription factor activity, sequence-specific DNA binding,transcription factor activity, RNA polymerase II distal enhancer sequence-speci…	transcription from RNA polymerase II promoter,Wnt signaling pathway, calcium modulating pathway,negative regulation of Wnt signaling pathway,calcineurin-NFAT signaling cascade,intracellular signal transduction,Fc-epsilon receptor signaling pathway,positive regulation of transcription, DNA-templated,positive regulation of transcription from RNA polymerase II promoter
1.56056	0.268333	0.0874989	Q96AT1	KIAA1143	Uncharacterized protein KIAA1143	K1143_HUMAN	3		protein binding
1.56027	0.00183327	0.00114819	Q8WX93	PALLD	Palladin	PALLD_HUMAN	10	ruffle,podosome,nucleus,cytosol,actin filament,plasma membrane,focal adhesion,actin cytoskeleton,Z disc,lamellipodium,axon,growth cone	actin binding,protein binding,muscle alpha-actinin binding	keratinocyte development,epithelial cell morphogenesis,cytoskeleton organization,cell migration,actin cytoskeleton organization
1.5594	2.44402e-14	6.72895e-14	Q96FV9	THOC1	THO complex subunit 1	THOC1_HUMAN	13	transcription export complex,THO complex,THO complex part of transcription export complex,nucleus,nucleoplasm,cytoplasm,cytosol,nuclear matrix,nuclear speck,intercellular bridge,nuclear chromosome, telomeric region	DNA binding,RNA binding,protein binding	regulation of DNA recombination,termination of RNA polymerase II transcription,RNA processing,RNA export from nucleus,mRNA export from nucleus,apoptotic process,signal transduction,RNA splicing,mRNA 3'-end processing,replication fork processing,regulation of DNA-templated transcription, elongation,positive regulation of DNA-templated transcription, elongation,viral mRNA export from host cell nucl…
1.55776	1.49522e-19	6.3062e-19	Q8IX90	SKA3	Spindle and kinetochore-associated protein 3	SKA3_HUMAN	17	kinetochore,condensed chromosome outer kinetochore,cytoplasm,spindle microtubule	protein binding	mitotic cell cycle,chromosome segregation,regulation of microtubule polymerization or depolymerization,cell division
1.55576	0.0145748	0.00717062	Q9NS91	RAD18	E3 ubiquitin-protein ligase RAD18	RAD18_HUMAN	3	nucleus,nucleoplasm,replication fork,cytoplasm,centrosome,nuclear body,site of double-strand break,nuclear inclusion body,Rad6-Rad18 complex	Y-form DNA binding,damaged DNA binding,protein binding,polyubiquitin binding,ubiquitin protein ligase binding,protein complex binding,identical protein binding,single-stranded DNA-dependent ATPase activity,metal ion binding,ubiquitin protein ligase activity	DNA repair,postreplication repair,protein monoubiquitination,cellular response to DNA damage stimulus,response to UV,protein ubiquitination,DNA damage response, detection of DNA damage,protein autoubiquitination,positive regulation of chromosome segregation,negative regulation of cell death
1.55212	0.0241316	0.0111025	Q9UBD5	ORC3	Origin recognition complex subunit 3	ORC3_HUMAN	4	nuclear chromosome, telomeric region,origin recognition complex,nucleoplasm,nuclear pre-replicative complex,nuclear origin of replication recognition complex,nuclear body,DNA replication preinitiation complex	DNA replication origin binding,protein binding	G1/S transition of mitotic cell cycle,DNA replication,pre-replicative complex assembly involved in nuclear cell cycle DNA replication,DNA replication initiation,neural precursor cell proliferation
1.54609	0.108112	0.0404145	P54578	USP14	Ubiquitin carboxyl-terminal hydrolase 14	UBP14_HUMAN	14	proteasome complex,nucleus,cytosol,plasma membrane,cell surface,cytoplasmic vesicle,synapse,extracellular exosome	cysteine-type endopeptidase activity,thiol-dependent ubiquitin-specific protease activity,endopeptidase inhibitor activity,protein binding,tRNA guanylyltransferase activity,thiol-dependent ubiquitinyl hydrolase activity,proteasome binding	ubiquitin-dependent protein catabolic process,chemical synaptic transmission,negative regulation of endopeptidase activity,protein deubiquitination,innate immune response,regulation of chemotaxis,regulation of proteasomal protein catabolic process,negative regulation of ER-associated ubiquitin-dependent protein catabolic process
1.54353	2.02508e-07	2.50799e-07	Q92600	RQCD1	Cell differentiation protein RCD1 homolog	RCD1_HUMAN	9	cytoplasmic mRNA processing body,nucleus,cytosol,membrane,CCR4-NOT complex,CCR4-NOT core complex,protein complex	epidermal growth factor receptor binding,protein binding,kinase binding,protein domain specific binding,protein homodimerization activity	nuclear-transcribed mRNA catabolic process, deadenylation-dependent decay,nuclear-transcribed mRNA poly(A) tail shortening,transcription, DNA-templated,regulation of transcription, DNA-templated,DNA damage response, signal transduction by p53 class mediator resulting in cell cycle arrest,sex differentiation,negative regulation of translation,cytokine-mediated signaling pathway,gene silencing by R…
1.53871	0.15464	0.0548733	Q8NCN4	RNF169	E3 ubiquitin-protein ligase RNF169	RN169_HUMAN	1	nucleus,nucleoplasm,nuclear speck,site of double-strand break	transferase activity,nucleosome binding,metal ion binding,K63-linked polyubiquitin binding	cellular response to DNA damage stimulus,protein ubiquitination,negative regulation of double-strand break repair
1.53593	0.000393963	0.000285488	Q96QT4	TRPM7	Transient receptor potential cation channel subfamily M member 7	TRPM7_HUMAN	2	ruffle,plasma membrane,integral component of membrane	actin binding,protein serine/threonine kinase activity,calcium channel activity,ATP binding,myosin binding,metal ion binding	cellular magnesium ion homeostasis,calcium-dependent cell-matrix adhesion,actomyosin structure organization,protein autophosphorylation,protein tetramerization,necroptotic process,calcium ion transmembrane transport
1.53445	0.93987	0.244259	Q9UI30	TRMT112	Multifunctional methyltransferase subunit TRM112-like protein	TR112_HUMAN	2	nucleoplasm,cytosol,protein complex,perinuclear region of cytoplasm,extracellular exosome	protein binding,protein methyltransferase activity,protein heterodimerization activity,rRNA (guanine) methyltransferase activity	translational termination,peptidyl-glutamine methylation,tRNA methylation,rRNA methylation,methylation,rRNA (guanine-N7)-methylation,positive regulation of rRNA processing
1.53224	0.00229905	0.00140416	O60231	DHX16	Putative pre-mRNA-splicing factor ATP-dependent RNA helicase DHX16	DHX16_HUMAN	2	nucleus,nucleoplasm,spliceosomal complex,cytoplasm	RNA binding,RNA helicase activity,ATP-dependent RNA helicase activity,protein binding,ATP binding,ATPase activity	mRNA splicing, via spliceosome,RNA splicing
1.53066	0.323556	0.102274	Q8TA86	RP9	Retinitis pigmentosa 9 protein	RP9_HUMAN	3	nucleus,signal recognition particle receptor complex,cytosol	RNA binding,protein binding,metal ion binding	RNA splicing,cognition
1.5289	0.000105167	8.51544e-05	Q13315	ATM	Serine-protein kinase ATM	ATM_HUMAN	3	nucleus,nucleoplasm,nucleolus,spindle,cytoplasmic vesicle,DNA repair complex,chromosome, telomeric region,nuclear chromosome, telomeric region	DNA binding,protein serine/threonine kinase activity,DNA-dependent protein kinase activity,protein binding,ATP binding,1-phosphatidylinositol-3-kinase activity,protein complex binding,protein dimerization activity,protein N-terminus binding	telomere maintenance,double-strand break repair via homologous recombination,DNA double-strand break processing,DNA synthesis involved in DNA repair,strand displacement,ovarian follicle development,response to hypoxia,somitogenesis,pre-B cell allelic exclusion,immunoglobulin production,DNA replication,DNA repair,double-strand break repair via nonhomologous end joining,protein phosphorylation,cell…
1.52848	1.05287e-10	1.94742e-10	P21127	CDK11B	Cyclin-dependent kinase 11B	CD11B_HUMAN	18	nucleus,cytoplasm	RNA binding,protein kinase activity,protein serine/threonine kinase activity,cyclin-dependent protein serine/threonine kinase activity,protein binding,ATP binding	mitotic cell cycle,regulation of cell growth,regulation of transcription, DNA-templated,protein phosphorylation,apoptotic process,regulation of mitotic cell cycle,cell proliferation,regulation of mRNA processing
1.52611	0.00242051	0.0014683	Q96II8	LRCH3	Leucine-rich repeat and calponin homology domain-containing protein 3	LRCH3_HUMAN	5	extracellular region,cytosol,plasma membrane	protein binding	signal transduction
1.52442	4.17067e-08	5.65619e-08	Q9Y448	KNSTRN	Small kinetochore-associated protein	SKAP_HUMAN	6	kinetochore,condensed chromosome kinetochore,spindle pole,nucleus,cytosol,microtubule cytoskeleton,microtubule plus-end,mitotic spindle	protein binding	mitotic sister chromatid segregation,spindle organization,chromosome segregation,cell division,regulation of attachment of spindle microtubules to kinetochore
1.5242	0.0152919	0.00748124	Q8WVZ9	KBTBD7	Kelch repeat and BTB domain-containing protein 7	KBTB7_HUMAN	4	cellular_component,cytosol,Cul3-RING ubiquitin ligase complex	molecular_function,protein binding,ubiquitin-protein transferase activity	MAPK cascade,biological_process,protein ubiquitination,post-translational protein modification
1.52062	0.106367	0.039867	P62136	PPP1CA	Serine/threonine-protein phosphatase PP1-alpha catalytic subunit	PP1A_HUMAN	11	protein phosphatase type 1 complex,nucleus,nucleoplasm,nucleolus,cytoplasm,cytosol,plasma membrane,cell-cell adherens junction,glycogen granule,dendritic spine,perikaryon,extracellular exosome,PTW/PP1 phosphatase complex,nuclear chromosome, telomeric region	phosphoprotein phosphatase activity,protein serine/threonine phosphatase activity,protein binding,protein phosphatase 1 binding,phosphatase activity,protein complex binding,ribonucleoprotein complex binding,metal ion binding,cadherin binding involved in cell-cell adhesion	glycogen metabolic process,regulation of glycogen biosynthetic process,regulation of glycogen catabolic process,protein dephosphorylation,cell cycle,dephosphorylation,lung development,negative regulation of protein binding,circadian regulation of gene expression,peptidyl-threonine dephosphorylation,regulation of translational initiation by eIF2 alpha dephosphorylation,regulation of circadian rhyt…
1.51741	0.079557	0.0311444	Q6NUQ1	RINT1	RAD50-interacting protein 1	RINT1_HUMAN	2	endoplasmic reticulum,endoplasmic reticulum membrane,cytosol,Dsl1/NZR complex	protein binding	retrograde vesicle-mediated transport, Golgi to ER,cell cycle,protein transport,regulation of ER to Golgi vesicle-mediated transport,regulation of signal transduction involved in mitotic G2 DNA damage checkpoint
1.51622	0.00347532	0.00202433	Q9Y3C0	CCDC53	WASH complex subunit CCDC53	CCD53_HUMAN	2	early endosome,WASH complex	protein binding	biological_process,protein transport
1.51608	0.185875	0.064217	Q8TBE9	NANP	N-acylneuraminate-9-phosphatase	NANP_HUMAN	3	cellular_component,cytosol	N-acylneuraminate-9-phosphatase activity	carbohydrate metabolic process,N-acetylglucosamine biosynthetic process,dephosphorylation,N-acetylneuraminate biosynthetic process
1.51298	0.682968	0.189786	P17707	AMD1	S-adenosylmethionine decarboxylase proenzyme	DCAM_HUMAN	1	cytosol	adenosylmethionine decarboxylase activity,putrescine binding	S-adenosylmethioninamine biosynthetic process,polyamine metabolic process,spermine biosynthetic process,spermidine biosynthetic process
1.50922	4.7826e-06	4.8317e-06	Q7Z5L9	IRF2BP2	Interferon regulatory factor 2-binding protein 2	I2BP2_HUMAN	4	nucleus,nucleoplasm,cytoplasm	metal ion binding	transcription, DNA-templated,regulation of transcription, DNA-templated
1.50595	0.000146794	0.000115474	Q9NY27	PPP4R2	Serine/threonine-protein phosphatase 4 regulatory subunit 2	PP4R2_HUMAN	6	nucleus,nucleoplasm,cytoplasm,centrosome,protein phosphatase 4 complex	protein binding,protein phosphatase regulator activity,protein binding, bridging	mRNA processing,cellular protein modification process,RNA splicing,regulation of double-strand break repair via homologous recombination,regulation of phosphoprotein phosphatase activity
1.50455	1.34969e-28	1.03602e-27	P78371	CCT2	T-complex protein 1 subunit beta	TCPB_HUMAN	30	zona pellucida receptor complex,extracellular region,cytosol,chaperonin-containing T-complex,microtubule,extracellular matrix,azurophil granule lumen,myelin sheath,cell body,extracellular exosome	protein binding,ATP binding,ubiquitin protein ligase binding,protein binding involved in protein folding,unfolded protein binding	protein folding,binding of sperm to zona pellucida,positive regulation of telomere maintenance via telomerase,neutrophil degranulation,protein stabilization,chaperone mediated protein folding independent of cofactor,chaperone-mediated protein complex assembly,positive regulation of telomerase activity,scaRNA localization to Cajal body,toxin transport,positive regulation of establishment of protei…
1.50356	0.0621983	0.0252237	Q8NB25	FAM184A	Protein FAM184A	F184A_HUMAN	13	extracellular space	molecular_function,protein binding	biological_process
1.50243	6.39407e-05	5.40301e-05	Q8IXL7	MSRB3	Methionine-R-sulfoxide reductase B3	MSRB3_HUMAN	2	mitochondrion,endoplasmic reticulum,cytosol	protein binding,zinc ion binding,peptide-methionine (R)-S-oxide reductase activity,L-methionine-(R)-S-oxide reductase activity	response to oxidative stress,protein repair,oxidation-reduction process
1.49956	0.251381	0.0829079	Q5TC82	RC3H1	Roquin-1	RC3H1_HUMAN	2	cytoplasmic mRNA processing body,cytoplasmic stress granule	RNA binding,mRNA 3'-UTR binding,RNA stem-loop binding,metal ion binding,ubiquitin protein ligase activity	nuclear-transcribed mRNA catabolic process, deadenylation-dependent decay,nuclear-transcribed mRNA catabolic process,B cell homeostasis,regulation of germinal center formation,negative regulation of germinal center formation,posttranscriptional regulation of gene expression,protein ubiquitination,negative regulation of B cell proliferation,cytoplasmic mRNA processing body assembly,T cell prolifer…
1.49775	0.00512431	0.00285859	O60925	PFDN1	Prefoldin subunit 1	PFD1_HUMAN	4	cytoplasm,prefoldin complex	transcription factor activity, sequence-specific DNA binding,protein binding involved in protein folding,unfolded protein binding	regulation of transcription, DNA-templated,protein folding,cytoskeleton organization,cell cycle
1.49712	1.12859e-05	1.07296e-05	Q8NEU8	APPL2	DCC-interacting protein 13-beta	DP13B_HUMAN	3	nucleus,endosome membrane,early endosome membrane,extracellular exosome,NuRD complex	protein binding	cell cycle,signal transduction,cell proliferation
1.49604	0.0159115	0.00773998	Q8IWF6	DENND6A	Protein DENND6A	DEN6A_HUMAN	7	cytoplasm,cytosol,intracellular membrane-bounded organelle,recycling endosome	Rab guanyl-nucleotide exchange factor activity	regulation of molecular function,positive regulation of cell-cell adhesion mediated by cadherin
1.4959	0.00813578	0.00430632	P56945	BCAR1	Breast cancer anti-estrogen resistance protein 1	BCAR1_HUMAN	2	ruffle,cytoplasm,cytosol,focal adhesion,actin cytoskeleton,lamellipodium,plasma membrane	signal transducer activity,protein binding,SH3 domain binding,protein kinase binding	regulation of cell growth,actin filament organization,cell adhesion,epidermal growth factor receptor signaling pathway,G-protein coupled receptor signaling pathway,integrin-mediated signaling pathway,cell proliferation,insulin receptor signaling pathway,positive regulation of endothelial cell migration,cell migration,positive regulation of cell migration,cellular response to hepatocyte growth fac…
1.48246	0.0508697	0.0211524	Q8NHZ8	CDC26	Anaphase-promoting complex subunit CDC26	CDC26_HUMAN	1	nucleoplasm,anaphase-promoting complex,cytosol	protein binding	regulation of mitotic metaphase/anaphase transition,anaphase-promoting complex-dependent catabolic process,protein ubiquitination involved in ubiquitin-dependent protein catabolic process,proteasome-mediated ubiquitin-dependent protein catabolic process,cell division,negative regulation of ubiquitin-protein ligase activity involved in mitotic cell cycle,positive regulation of ubiquitin-protein li…
1.48161	7.96009e-24	4.48617e-23	Q9UBB9	TFIP11	Tuftelin-interacting protein 11	TFP11_HUMAN	20	nuclear chromosome, telomeric region,proteinaceous extracellular matrix,nucleoplasm,spliceosomal complex,nucleolus,cytoplasm,nuclear speck,U2-type post-mRNA release spliceosomal complex,catalytic step 2 spliceosome	DNA binding,protein binding	spliceosomal complex disassembly,mRNA splicing, via spliceosome,regulation of transcription, DNA-templated,RNA processing,biomineral tissue development,negative regulation of protein complex assembly,protection from non-homologous end joining at telomere,negative regulation of protein binding,negative regulation of DNA ligase activity,negative regulation of double-strand break repair via nonhomol…
1.48143	0.0638996	0.0258154	Q9H840	GEMIN7	Gem-associated protein 7	GEMI7_HUMAN	2	nucleus,nucleoplasm,cytoplasm,cytosol,nuclear body,SMN complex,SMN-Sm protein complex,Gemini of coiled bodies	protein binding	spliceosomal snRNP assembly,mRNA splicing, via spliceosome,nuclear import
1.48074	0.603114	0.171577	Q9NWS8	RMND1	Required for meiotic nuclear division protein 1 homolog	RMND1_HUMAN	1	mitochondrion	protein binding	translation,positive regulation of mitochondrial translation
1.47745	0.899987	0.236053	Q68CQ4	DIEXF	Digestive organ expansion factor homolog	DIEXF_HUMAN	1	nucleoplasm,nucleolus,small-subunit processome	RNA binding,protein binding,rRNA binding,U3 snoRNA binding	maturation of SSU-rRNA from tricistronic rRNA transcript (SSU-rRNA, 5.8S rRNA, LSU-rRNA),rRNA processing,multicellular organism development
1.47529	0.113168	0.0419731	Q96JM2	ZNF462	Zinc finger protein 462	ZN462_HUMAN	2	nucleus	DNA binding,protein binding,metal ion binding	chromatin organization,transcription, DNA-templated,negative regulation of DNA binding,positive regulation of transcription from RNA polymerase II promoter
1.47297	0.117308	0.043287	Q8N3X6	LCORL	Ligand-dependent nuclear receptor corepressor-like protein	LCORL_HUMAN	2	nucleus	DNA binding,protein binding	regulation of transcription from RNA polymerase II promoter,transcription from RNA polymerase II promoter
1.47029	3.48234e-07	4.17011e-07	A6NKD9	CCDC85C	Coiled-coil domain-containing protein 85C	CC85C_HUMAN	9	bicellular tight junction,apical junction complex		cerebral cortex development
1.46646	0.0152285	0.00745502	Q9ULJ1	ODF2L	Outer dense fiber protein 2-like	ODF2L_HUMAN	1	centrosome
1.46624	3.07163e-10	5.40527e-10	Q9UNM6	PSMD13	26S proteasome non-ATPase regulatory subunit 13	PSD13_HUMAN	7	proteasome complex,extracellular region,nucleus,nucleoplasm,cytosol,proteasome regulatory particle,proteasome regulatory particle, lid subcomplex,membrane,proteasome accessory complex,secretory granule lumen,extracellular exosome,ficolin-1-rich granule lumen	structural molecule activity	MAPK cascade,protein polyubiquitination,stimulatory C-type lectin receptor signaling pathway,antigen processing and presentation of exogenous peptide antigen via MHC class I, TAP-dependent,ubiquitin-dependent protein catabolic process,regulation of cellular amino acid metabolic process,meiosis I,negative regulation of G2/M transition of mitotic cell cycle,protein deubiquitination,anaphase-promoti…
1.46566	1.40321e-07	1.78624e-07	P15822	HIVEP1	Zinc finger protein 40	ZEP1_HUMAN	15	nucleus,nucleoplasm,mitochondrion,nuclear body	RNA polymerase II distal enhancer sequence-specific DNA binding,transcriptional repressor activity, RNA polymerase II distal enhancer sequence-specific binding,DNA binding,protein binding,sequence-specific DNA binding,transcription regulatory region DNA binding,metal ion binding	negative regulation of transcription from RNA polymerase II promoter,transcription from RNA polymerase II promoter,signal transduction,multicellular organism development
1.46446	0.0275494	0.0124335	Q9UL46	PSME2	Proteasome activator complex subunit 2	PSME2_HUMAN	4	proteasome complex,nucleoplasm,cytoplasm,cytosol,proteasome activator complex,membrane,extracellular exosome	protein binding,identical protein binding,endopeptidase activator activity	MAPK cascade,protein polyubiquitination,stimulatory C-type lectin receptor signaling pathway,antigen processing and presentation of exogenous peptide antigen via MHC class I, TAP-dependent,regulation of cellular amino acid metabolic process,positive regulation of endopeptidase activity,negative regulation of G2/M transition of mitotic cell cycle,protein deubiquitination,anaphase-promoting complex…
1.46346	3.36127e-11	6.61906e-11	P18615	NELFE	Negative elongation factor E	NELFE_HUMAN	9	nucleus,nucleoplasm,plasma membrane,nuclear body,NELF complex	chromatin binding,RNA binding,protein binding	transcription from RNA polymerase II promoter,transcription elongation from RNA polymerase II promoter,negative regulation of transcription elongation from RNA polymerase II promoter,positive regulation of transcription from RNA polymerase II promoter,positive regulation of viral transcription,positive regulation of histone H3-K4 methylation,positive regulation of ERK1 and ERK2 cascade,negative r…
1.46042	0.000305379	0.000227009	A7MCY6	TBKBP1	TANK-binding kinase 1-binding protein 1	TBKB1_HUMAN	8		protein binding	viral process,innate immune response
1.45888	0.00573636	0.00316235	P08133	ANXA6	Annexin A6	ANXA6_HUMAN	2	mitochondrion,lysosomal membrane,focal adhesion,membrane,late endosome membrane,melanosome,perinuclear region of cytoplasm,extracellular exosome	calcium ion binding,protein binding,GTP binding,calcium-dependent phospholipid binding,lipid binding,ligand-gated ion channel activity,cholesterol binding,protein homodimerization activity,calcium-dependent protein binding	calcium ion transport,regulation of muscle contraction,ion transmembrane transport,protein homooligomerization,mitochondrial calcium ion homeostasis,apoptotic signaling pathway
1.4588	3.04949e-20	1.35934e-19	P49023	PXN	Paxillin	PAXI_HUMAN	9	stress fiber,cytosol,microtubule associated complex,plasma membrane,focal adhesion,cell cortex,lamellipodium	integrin binding,protein binding,beta-catenin binding,vinculin binding,protein kinase binding,ubiquitin protein ligase binding,neuropilin binding,metal ion binding	muscle contraction,cell adhesion,cell-matrix adhesion,signal transduction,signal complex assembly,epidermal growth factor receptor signaling pathway,transforming growth factor beta receptor signaling pathway,cellular response to reactive oxygen species,endothelial cell migration,vascular endothelial growth factor receptor signaling pathway,positive regulation of stress fiber assembly,growth hormo…
1.45688	0.0012483	0.000812581	O60645	EXOC3	Exocyst complex component 3	EXOC3_HUMAN	8	exocyst,Golgi apparatus,cytosol,growth cone,midbody,secretory granule membrane,perinuclear region of cytoplasm	SNARE binding,protein binding,cadherin binding	exocytosis,protein transport,exocyst localization
1.45641	0.0237819	0.010964	Q9H098	FAM107B	Protein FAM107B	F107B_HUMAN	2
1.45619	1.19355e-13	3.05389e-13	Q92625	ANKS1A	Ankyrin repeat and SAM domain-containing protein 1A	ANS1A_HUMAN	30	nucleoplasm,cytosol,neuron projection	protein binding,ephrin receptor binding	substrate-dependent cell migration,neuron remodeling,ephrin receptor signaling pathway,regulation of ephrin receptor signaling pathway
1.45589	0.075439	0.029809	Q9UQ84	EXO1	Exonuclease 1	EXO1_HUMAN	3	nucleus,nucleoplasm,plasma membrane,nuclear body	DNA binding,chromatin binding,RNA-DNA hybrid ribonuclease activity,exonuclease activity,protein binding,5'-3' exonuclease activity,5'-3' exodeoxyribonuclease activity,single-stranded DNA 5'-3' exodeoxyribonuclease activity,metal ion binding,flap endonuclease activity,double-stranded DNA 5'-3' exodeoxyribonuclease activity	DNA synthesis involved in DNA repair,strand displacement,humoral immune response mediated by circulating immunoglobulin,DNA replication,DNA repair,mismatch repair,DNA recombination,somatic hypermutation of immunoglobulin genes,isotype switching,meiotic cell cycle,RNA phosphodiester bond hydrolysis, endonucleolytic,t-circle formation,regulation of signal transduction by p53 class mediator
1.44963	0.0961184	0.0365938	P59998	ARPC4	Actin-related protein 2/3 complex subunit 4	ARPC4_HUMAN	4	cytosol,Arp2/3 protein complex,cell projection,extracellular exosome	structural constituent of cytoskeleton,protein binding,enzyme binding,protein binding, bridging,actin filament binding	actin filament polymerization,Arp2/3 complex-mediated actin nucleation,Fc-gamma receptor signaling pathway involved in phagocytosis,actin nucleation,ephrin receptor signaling pathway,membrane organization
1.4451	0.0814486	0.0318006	Q16363	LAMA4	Laminin subunit alpha-4	LAMA4_HUMAN	5	extracellular region,basement membrane,basal lamina,extracellular matrix,extracellular exosome	receptor binding,extracellular matrix structural constituent,protein binding	cell adhesion,regulation of cell adhesion,extracellular matrix organization,regulation of cell migration,regulation of embryonic development
1.44042	0.00186826	0.00116648	Q9P2N6	KANSL3	KAT8 regulatory NSL complex subunit 3	KANL3_HUMAN	3	histone acetyltransferase complex,nucleus,nucleoplasm,nucleolus,intracellular membrane-bounded organelle	histone acetyltransferase activity (H4-K5 specific),histone acetyltransferase activity (H4-K8 specific),histone acetyltransferase activity (H4-K16 specific)	histone H4-K5 acetylation,histone H4-K8 acetylation,histone H4-K16 acetylation
1.44014	0.570022	0.163999	Q9UPP5	KIAA1107	Uncharacterized protein KIAA1107	K1107_HUMAN	3
1.43824	0.388899	0.119283	Q9NR48	ASH1L	Histone-lysine N-methyltransferase ASH1L	ASH1L_HUMAN	1	nucleus,nucleoplasm,chromosome,Golgi apparatus,bicellular tight junction,extracellular exosome	DNA binding,chromatin binding,histone-lysine N-methyltransferase activity,histone methyltransferase activity (H3-K4 specific),metal ion binding,histone methyltransferase activity (H3-K36 specific)	skeletal system development,negative regulation of acute inflammatory response,DNA packaging,transcription from RNA polymerase II promoter,cell-cell signaling,single fertilization,post-embryonic development,interleukin-6 production,negative regulation of I-kappaB kinase/NF-kappaB signaling,negative regulation of MAPK cascade,positive regulation of transcription from RNA polymerase II promoter,dec…
1.43738	1.2478e-10	2.28485e-10	Q5T481	RBM20	RNA-binding protein 20	RBM20_HUMAN	9	nucleus	RNA binding,zinc ion binding	mRNA processing,heart development,RNA splicing,positive regulation of RNA splicing
1.43016	0.000315154	0.000233511	Q86SQ7	SDCCAG8	Serologically defined colon cancer antigen 8	SDCG8_HUMAN	9	centrosome,centriole,cytosol,cell-cell junction,centriolar satellite	protein binding	G2/M transition of mitotic cell cycle,neuron migration,centrosome cycle,regulation of G2/M transition of mitotic cell cycle,establishment of cell polarity,tube formation,ciliary basal body docking
1.42757	0.0261389	0.0118779	Q14012	CAMK1	Calcium/calmodulin-dependent protein kinase type 1	KCC1A_HUMAN	3	intracellular,nucleus,cytoplasm	calmodulin-dependent protein kinase activity,protein binding,calmodulin binding,ATP binding	protein phosphorylation,nucleocytoplasmic transport,cell cycle,signal transduction,positive regulation of neuron projection development,peptidyl-threonine phosphorylation,negative regulation of protein binding,regulation of protein localization,positive regulation of peptidyl-serine phosphorylation,intracellular signal transduction,regulation of protein binding,positive regulation of transcriptio…
1.42202	0.0460712	0.0194501	Q99962	SH3GL2	Endophilin-A1	SH3G2_HUMAN	1	Golgi membrane,early endosome,cytosol,plasma membrane,clathrin-coated endocytic vesicle membrane,synapse,extracellular exosome	protein binding,lipid binding,identical protein binding	regulation of receptor internalization,microtubule-based movement,signal transduction,central nervous system development,synaptic vesicle uncoating,antigen processing and presentation of exogenous peptide antigen via MHC class II,neuron projection development,negative regulation of epidermal growth factor receptor signaling pathway,membrane organization,dendrite extension,cellular response to bra…
1.41812	4.32946e-06	4.40405e-06	Q9C0F1	CEP44	Centrosomal protein of 44 kDa	CEP44_HUMAN	7	spindle pole,cytoplasm,centrosome,midbody	protein binding
1.41759	0.0370249	0.0160821	Q8WUW1	BRK1	Protein BRICK1	BRK1_HUMAN	1	cytosol,cytoskeleton,lamellipodium,SCAR complex,extracellular exosome	protein binding,protein complex binding,Rac GTPase binding	in utero embryonic development,actin filament organization,positive regulation of cell proliferation,positive regulation of lamellipodium assembly,Rac protein signal transduction,Fc-gamma receptor signaling pathway involved in phagocytosis,vascular endothelial growth factor receptor signaling pathway,cell motility,protein homotrimerization,positive regulation of Arp2/3 complex-mediated actin nucl…
1.41581	2.91574e-33	2.91423e-32	P62191	PSMC1	26S protease regulatory subunit 4	PRS4_HUMAN	37	proteasome complex,nucleus,nucleoplasm,cytosol,proteasome regulatory particle, base subcomplex,membrane,proteasome accessory complex,nuclear proteasome complex,cytosolic proteasome complex	RNA binding,protein binding,ATP binding,ATPase activity,TBP-class protein binding,proteasome-activating ATPase activity	MAPK cascade,protein polyubiquitination,stimulatory C-type lectin receptor signaling pathway,antigen processing and presentation of exogenous peptide antigen via MHC class I, TAP-dependent,protein folding,regulation of cellular amino acid metabolic process,negative regulation of G2/M transition of mitotic cell cycle,protein deubiquitination,ER-associated ubiquitin-dependent protein catabolic proc…
1.40953	0.0636066	0.0257157	Q8N954	GPATCH11	G patch domain-containing protein 11	GPT11_HUMAN	1	kinetochore,condensed chromosome kinetochore	nucleic acid binding,protein binding
1.40898	1.2815e-17	4.65315e-17	O95071	UBR5	E3 ubiquitin-protein ligase UBR5	UBR5_HUMAN	20	nucleus,nucleoplasm,cytosol,membrane,protein complex,perinuclear region of cytoplasm	RNA binding,ubiquitin-protein transferase activity,protein binding,zinc ion binding,ubiquitin-ubiquitin ligase activity,ubiquitin binding	protein polyubiquitination,DNA repair,ubiquitin-dependent protein catabolic process,cellular response to DNA damage stimulus,cell proliferation,positive regulation of gene expression,positive regulation of protein import into nucleus, translocation,positive regulation of catenin import into nucleus,progesterone receptor signaling pathway,positive regulation of canonical Wnt signaling pathway,nega…
1.40723	0.00298236	0.00176613	Q96ST8	CEP89	Centrosomal protein of 89 kDa	CEP89_HUMAN	7	spindle pole,mitochondrial intermembrane space,centrosome,centriole,cytosol,plasma membrane,motile cilium,ciliary transition fiber,Requires Ontology	protein binding	mitochondrion organization,chemical synaptic transmission,cilium morphogenesis,ciliary basal body docking,Requires Ontology
1.40108	3.51716e-12	7.64809e-12	P23588	EIF4B	Eukaryotic translation initiation factor 4B	IF4B_HUMAN	30	cytosol,polysome,eukaryotic translation initiation factor 4F complex	RNA binding,translation initiation factor activity,helicase activity,protein binding,RNA strand annealing activity,RNA strand-exchange activity,ribosomal small subunit binding	nuclear-transcribed mRNA poly(A) tail shortening,formation of translation preinitiation complex,translational initiation,regulation of translational initiation,eukaryotic translation initiation factor 4F complex assembly
1.40009	0.448426	0.134227	Q13137	CALCOCO2	Calcium-binding and coiled-coil domain-containing protein 2	CACO2_HUMAN	1	autophagosome membrane,nucleus,cytoplasm,autophagosome,cytosol,cytoskeleton,membrane,cytoplasmic vesicle,intracellular membrane-bounded organelle,perinuclear region of cytoplasm	protein binding,protein homodimerization activity	viral process,response to interferon-gamma,xenophagy,positive regulation of autophagosome maturation
1.39938	0.431336	0.129973	Q6ZQX7	LIAT1	Protein LIAT1	LIAT1_HUMAN	1			protein arginylation
1.39928	0.0629301	0.0254855	Q8IVM0	CCDC50	Coiled-coil domain-containing protein 50	CCD50_HUMAN	2	cytosol	protein binding,ubiquitin protein ligase binding	sensory perception of sound
1.39876	0.00867741	0.00456399	Q70IA6	MOB2	MOB kinase activator 2	MOB2_HUMAN	1	nucleus,nucleolus,cytosol,neuron projection terminus,perinuclear region of cytoplasm	protein binding,metal ion binding	positive regulation of protein phosphorylation,positive regulation of neuron projection development,actin cytoskeleton organization
1.39844	1.7268e-39	2.23147e-38	Q15154	PCM1	Pericentriolar material 1 protein	PCM1_HUMAN	70	pericentriolar material,cytoplasm,centrosome,centriole,cytosol,membrane,nuclear membrane,centriolar satellite,ciliary transition zone,ciliary basal body,protein complex,apical part of cell,Requires Ontology	protein binding,identical protein binding	G2/M transition of mitotic cell cycle,neuron migration,centrosome cycle,regulation of G2/M transition of mitotic cell cycle,interkinetic nuclear migration,cytoplasmic microtubule organization,microtubule anchoring,microtubule anchoring at centrosome,social behavior,intraciliary transport involved in cilium morphogenesis,negative regulation of neurogenesis,cilium morphogenesis,protein localization…
1.39615	0.000394208	0.000285574	Q96CS2	HAUS1	HAUS augmin-like complex subunit 1	HAUS1_HUMAN	11	spindle pole,centrosome,cytosol,microtubule,HAUS complex	molecular_function,protein binding	G2/M transition of mitotic cell cycle,centrosome cycle,regulation of G2/M transition of mitotic cell cycle,spindle assembly,cell division,ciliary basal body docking
1.39397	4.22154e-19	1.71453e-18	Q9UPN4	CEP131	Centrosomal protein of 131 kDa	CP131_HUMAN	43	acrosomal vesicle,centrosome,microtubule organizing center,cytosol,microtubule cytoskeleton,centriolar satellite,ciliary transition zone,intracellular membrane-bounded organelle,intercellular bridge	molecular_function,protein binding,protein complex binding,protein homodimerization activity	G2/M transition of mitotic cell cycle,multicellular organism development,spermatogenesis,positive regulation of cell proliferation,regulation of G2/M transition of mitotic cell cycle,regulation of centrosome duplication,cell differentiation,intraciliary transport involved in cilium morphogenesis,protein localization to centrosome,positive regulation of intracellular protein transport,ciliary basa…
1.39358	0.000226792	0.000173082	P00491	PNP	Purine nucleoside phosphorylase	PNPH_HUMAN	2	extracellular region,intracellular,nucleus,cytoplasm,cytosol,cytoskeleton,secretory granule lumen,extracellular exosome,ficolin-1-rich granule lumen	nucleoside binding,purine nucleobase binding,purine-nucleoside phosphorylase activity,drug binding,phosphate ion binding	nucleobase-containing compound metabolic process,inosine catabolic process,purine nucleotide catabolic process,nicotinamide riboside catabolic process,immune response,NAD biosynthesis via nicotinamide riboside salvage pathway,urate biosynthetic process,positive regulation of T cell proliferation,response to drug,purine-containing compound salvage,neutrophil degranulation,positive regulation of al…
1.39219	0.00153166	0.000977797	O14787	TNPO2	Transportin-2	TNPO2_HUMAN	1	nucleus,cytoplasm,nuclear membrane,nuclear periphery	protein binding,nuclear localization sequence binding,Ran GTPase binding,protein transporter activity	protein import into nucleus, translocation,NLS-bearing protein import into nucleus,ribosomal protein import into nucleus
1.39083	2.46732e-13	6.08193e-13	Q9UHR5	SAP30BP	SAP30-binding protein	S30BP_HUMAN	7	nucleus,nucleoplasm,intermediate filament cytoskeleton	protein binding	transcription, DNA-templated,regulation of transcription, DNA-templated,apoptotic process,positive regulation of cell death
1.39061	5.44445e-11	1.04219e-10	O43395	PRPF3	U4/U6 small nuclear ribonucleoprotein Prp3	PRPF3_HUMAN	19	nucleus,nucleoplasm,spliceosomal complex,cytosol,Cajal body,nuclear speck,protein complex,U4/U6 x U5 tri-snRNP complex	RNA binding,protein binding,identical protein binding	spliceosomal tri-snRNP complex assembly,RNA splicing, via transesterification reactions,mRNA splicing, via spliceosome,mRNA processing,RNA splicing
1.38665	2.46299e-05	2.22005e-05	Q9NPG3	UBN1	Ubinuclein-1	UBN1_HUMAN	2	nucleus,nucleoplasm,bicellular tight junction,nuclear body,PML body	DNA binding,transcription factor activity, sequence-specific DNA binding,protein binding	DNA replication-independent nucleosome assembly,regulation of transcription from RNA polymerase II promoter,viral process,chromatin modification
1.38225	0.0819363	0.0319715	Q03111	MLLT1	Protein ENL	ENL_HUMAN	3	fibrillar center,nucleus,nucleoplasm,cytosol,transcription elongation factor complex	DNA binding,protein binding	regulation of transcription, DNA-templated,transcription from RNA polymerase II promoter,transcription elongation from RNA polymerase II promoter,negative regulation of protein kinase activity
1.38121	4.16357e-05	3.63088e-05	Q7RTP6	MICAL3	Protein-methionine sulfoxide oxidase MICAL3	MICA3_HUMAN	8	nucleus,nucleoplasm,spindle,cytosol,plasma membrane,cell cortex,midbody,cell projection	actin binding,oxidoreductase activity, acting on paired donors, with incorporation or reduction of molecular oxygen, NAD(P)H as one donor, and incorporation of one atom of oxygen,metal ion binding,FAD binding	exocytosis,cytoskeleton organization,cell cycle,actin filament depolymerization,cell division,oxidation-reduction process
1.38073	2.42451e-05	2.18793e-05	Q9Y6J9	TAF6L	TAF6-like RNA polymerase II p300/CBP-associated factor-associated factor 65 kDa subunit 6L	TAF6L_HUMAN	6	histone deacetylase complex,nucleus,nucleoplasm,STAGA complex,extracellular exosome	DNA binding,transcription coactivator activity,protein binding,protein heterodimerization activity,histone acetyltransferase activity	chromatin remodeling,DNA-templated transcription, initiation,regulation of transcription from RNA polymerase II promoter,histone H3 acetylation,regulation of sequence-specific DNA binding transcription factor activity
1.38037	0.00701074	0.00377433	O95295	SNAPIN	SNARE-associated protein Snapin	SNAPN_HUMAN	1	Golgi membrane,lysosomal membrane,synaptic vesicle,cell junction,secretory granule,synaptic vesicle membrane,BLOC-1 complex,synapse,perinuclear region of cytoplasm,BORC complex,axon cytoplasm	SNARE binding,protein binding	intracellular protein transport,lysosomal lumen acidification,neurotransmitter secretion,anterograde axonal transport,retrograde axonal transport,endosome to lysosome transport,negative regulation of neuron projection development,viral process,synaptic vesicle exocytosis,synaptic vesicle maturation,neuron projection development,synaptic vesicle fusion to presynaptic active zone membrane,lysosome …
1.37949	0.0685142	0.0274286	P35250	RFC2	Replication factor C subunit 2	RFC2_HUMAN	3	nucleus,nucleoplasm,DNA replication factor C complex,Ctf18 RFC-like complex	protein binding,ATP binding,enzyme binding,DNA clamp loader activity,single-stranded DNA-dependent ATPase activity	DNA replication,DNA repair,transcription-coupled nucleotide-excision repair,nucleotide-excision repair, DNA incision, 5'-to lesion,nucleotide-excision repair, DNA gap filling,translesion synthesis,telomere maintenance via semi-conservative replication,nucleotide-excision repair, DNA incision,error-prone translesion synthesis,DNA damage response, detection of DNA damage,error-free translesion synt…
1.37927	0.314057	0.0998469	Q86V21	AACS	Acetoacetyl-CoA synthetase	AACS_HUMAN	1	cytosol	protein binding,ATP binding,acetoacetate-CoA ligase activity,butyrate-CoA ligase activity	liver development,fatty acid metabolic process,response to nutrient,response to purine-containing compound,positive regulation of insulin secretion,response to oleic acid,response to starvation,response to ethanol,ketone body biosynthetic process,white fat cell differentiation,adipose tissue development,cellular response to glucose stimulus,cellular response to testosterone stimulus,cellular resp…
1.37275	0.0243441	0.0111775	C4AMC7;Q6VEQ5;Q9NQA3	WASH3P;WASH2P;WASH6P	Putative WAS protein family homolog 3;WAS protein family homolog 2;WAS protein family homolog 6	WASH3_HUMAN;WASH2_HUMAN;WASH6_HUMAN	5	early endosome,autophagosome,centriole,cytosol,lamellipodium,filopodium,early endosome membrane,recycling endosome,recycling endosome membrane,WASH complex;early endosome,late endosome,autophagosome,centriole,cytosol,early endosome membrane,recycling endosome,recycling endosome membrane,WASH complex;early endosome,cytosol,early endosome membrane,recycling endosome,recycling endosome membrane,WASH…	actin binding,alpha-tubulin binding;actin binding,alpha-tubulin binding;molecular_function,actin binding,alpha-tubulin binding	protein targeting to lysosome,endosome organization,endosomal transport,Arp2/3 complex-mediated actin nucleation,retrograde transport, endosome to Golgi,early endosome to late endosome transport;protein transport,endosomal transport,Arp2/3 complex-mediated actin nucleation,retrograde transport, endosome to Golgi;biological_process,endosomal transport,Arp2/3 complex-mediated actin nucleation,retro…
1.36995	1.33666e-08	1.92283e-08	Q9UPU7	TBC1D2B	TBC1 domain family member 2B	TBD2B_HUMAN	19	intracellular,cytosol,endomembrane system	GTPase activator activity,protein binding,Rab GTPase binding	intracellular protein transport,regulation of vesicle fusion,activation of GTPase activity,regulation of cilium assembly
1.36907	1.03219e-06	1.15295e-06	P30414	NKTR	NK-tumor recognition protein	NKTR_HUMAN	4	nucleoplasm,mitochondrion,cytosol,plasma membrane	peptidyl-prolyl cis-trans isomerase activity,cyclosporin A binding	protein peptidyl-prolyl isomerization,protein folding
1.3684	3.47465e-13	8.44033e-13	Q9UJX5	ANAPC4	Anaphase-promoting complex subunit 4	APC4_HUMAN	19	nucleus,nucleoplasm,anaphase-promoting complex,cytosol	ubiquitin-protein transferase activity,protein binding,protein phosphatase binding	regulation of mitotic metaphase/anaphase transition,anaphase-promoting complex-dependent catabolic process,protein ubiquitination involved in ubiquitin-dependent protein catabolic process,proteasome-mediated ubiquitin-dependent protein catabolic process,cell division,negative regulation of ubiquitin-protein ligase activity involved in mitotic cell cycle,positive regulation of ubiquitin-protein li…
1.36656	3.03033e-39	3.87681e-38	Q5T5Y3	CAMSAP1	Calmodulin-regulated spectrin-associated protein 1	CAMP1_HUMAN	41	cytoplasm,microtubule,microtubule minus-end	calmodulin binding,microtubule binding,spectrin binding,microtubule minus-end binding	microtubule cytoskeleton organization,cytoskeleton organization,regulation of cell morphogenesis,regulation of microtubule polymerization,neuron projection development
1.366	0.0292543	0.013084	Q8IWP9	CCDC28A	Coiled-coil domain-containing protein 28A	CC28A_HUMAN	1		protein binding
1.36442	0.000410857	0.000296627	O00743	PPP6C	Serine/threonine-protein phosphatase 6 catalytic subunit	PPP6_HUMAN	6	Golgi membrane,mitochondrion,cytosol	protein serine/threonine phosphatase activity,protein binding,metal ion binding	G1/S transition of mitotic cell cycle,protein dephosphorylation,innate immune response,COPII vesicle coating
1.35928	0.0178003	0.00852262	Q9BS18	ANAPC13	Anaphase-promoting complex subunit 13	APC13_HUMAN	1	anaphase-promoting complex	protein binding	cell cycle,cell division,protein K11-linked ubiquitination
1.35797	0.530775	0.154608	Q96RY7	IFT140	Intraflagellar transport protein 140 homolog	IF140_HUMAN	5	photoreceptor outer segment,centrosome,cilium,axoneme,intraciliary transport particle A,photoreceptor connecting cilium,ciliary basal body,ciliary tip	molecular_function	determination of left/right symmetry,heart development,regulation of smoothened signaling pathway,neural tube patterning,embryonic camera-type eye development,intraciliary retrograde transport,intraciliary transport involved in cilium morphogenesis,photoreceptor cell outer segment organization,embryonic digit morphogenesis,embryonic cranial skeleton morphogenesis,skeletal system morphogenesis,ret…
1.35782	0.0266997	0.0121012	O95197	RTN3	Reticulon-3	RTN3_HUMAN	6	Golgi membrane,extracellular space,endoplasmic reticulum,endoplasmic reticulum membrane,plasma membrane,integral component of membrane,extracellular exosome	protein binding	apoptotic process,viral process,vesicle-mediated transport,endoplasmic reticulum tubular network organization,endoplasmic reticulum tubular network assembly
1.35747	2.4036e-08	3.357e-08	Q8TD16	BICD2	Protein bicaudal D homolog 2	BICD2_HUMAN	14	nuclear envelope,annulate lamellae,nuclear pore,cytoplasm,Golgi apparatus,centrosome,cytosol,plasma membrane,cytoplasmic vesicle	protein binding,cytoskeletal adaptor activity,Rab GTPase binding,dynactin binding,dynein light intermediate chain binding,dynein complex binding	protein targeting to Golgi,retrograde vesicle-mediated transport, Golgi to ER,mRNA transport,centrosome localization,regulation of microtubule cytoskeleton organization,minus-end-directed organelle transport along microtubule,microtubule anchoring at microtubule organizing center
1.35224	0.00707898	0.0038052	Q8TES7	FBF1	Fas-binding factor 1	FBF1_HUMAN	1	spindle pole,centrosome,centriole,cytosol,ciliary transition fiber,apical junction complex,keratin filament	protein binding	apical junction assembly,cilium morphogenesis,establishment of epithelial cell polarity,ciliary basal body docking
1.35217	0.205537	0.069853	O75146	HIP1R	Huntingtin-interacting protein 1-related protein	HIP1R_HUMAN	7	mitochondrion,cytosol,cytoskeleton,clathrin-coated pit,cell cortex,postsynaptic density,apical plasma membrane,clathrin-coated vesicle,clathrin-coated vesicle membrane,ruffle membrane,dendrite cytoplasm,neuronal cell body,dendritic spine,intracellular membrane-bounded organelle,perinuclear region of cytoplasm,synaptic membrane	protein binding,phosphatidylinositol-4,5-bisphosphate binding,phosphatidylinositol-3,4,5-trisphosphate binding,SH3 domain binding,clathrin binding,clathrin light chain binding,phosphatidylinositol binding,clathrin adaptor activity,identical protein binding,protein homodimerization activity,phosphatidylinositol-3,4-bisphosphate binding,protein heterodimerization activity,actin filament binding,pho…	receptor-mediated endocytosis,apoptotic process,activation of cysteine-type endopeptidase activity involved in apoptotic process,regulation of endocytosis,negative regulation of actin filament polymerization,positive regulation of protein binding,regulation of actin cytoskeleton organization,negative regulation of Arp2/3 complex-mediated actin nucleation,positive regulation of apoptotic process,n…
1.35204	0.00083609	0.000566045	Q8N3X1	FNBP4	Formin-binding protein 4	FNBP4_HUMAN	6	nuclear speck	protein binding
1.35128	0.0439784	0.0186796	Q9Y6I3	EPN1	Epsin-1	EPN1_HUMAN	1	nucleus,cytosol,plasma membrane,clathrin-coated pit	protein binding,lipid binding	in utero embryonic development,endocytosis,Notch signaling pathway,female pregnancy,negative regulation of epidermal growth factor receptor signaling pathway,embryonic organ development,membrane organization
1.351	3.23363e-13	7.8898e-13	Q6IN85	PPP4R3A	Serine/threonine-protein phosphatase 4 regulatory subunit 3A	P4R3A_HUMAN	19	nucleoplasm,cytoplasm,microtubule organizing center
1.34843	4.66776e-17	1.60528e-16	Q8IVW6	ARID3B	AT-rich interactive domain-containing protein 3B	ARI3B_HUMAN	18	nucleus,nucleoplasm	RNA polymerase II regulatory region sequence-specific DNA binding,RNA polymerase II core promoter proximal region sequence-specific DNA binding,RNA polymerase II distal enhancer sequence-specific DNA binding,transcriptional activator activity, RNA polymerase II core promoter proximal region sequence-specific binding,transcriptional activator activity, RNA polymerase II distal enhancer sequence-sp…	transcription from RNA polymerase II promoter,biological_process,positive regulation of transcription from RNA polymerase II promoter
1.34637	0.657118	0.183982	O14772	FPGT	Fucose-1-phosphate guanylyltransferase	FPGT_HUMAN	1	cytoplasm,cytosol	catalytic activity,GTP binding,fucose-1-phosphate guanylyltransferase activity	fucose metabolic process
1.34595	7.88306e-15	2.27312e-14	Q5H9R7	PPP6R3	Serine/threonine-protein phosphatase 6 regulatory subunit 3	PP6R3_HUMAN	20	Golgi membrane,nucleoplasm,cytosol,plasma membrane	protein binding,protein phosphatase binding	regulation of phosphoprotein phosphatase activity,COPII vesicle coating
1.34507	1.72373e-08	2.44572e-08	P10636	MAPT	Microtubule-associated protein tau	TAU_HUMAN	6	nucleus,cytoplasm,cytosol,microtubule,microtubule associated complex,plasma membrane,microtubule cytoskeleton,nuclear speck,axon,dendrite,growth cone,axolemma,nuclear periphery,cytoplasmic ribonucleoprotein granule,somatodendritic compartment,neuronal cell body,cell body,tubulin complex,neurofibrillary tangle,axon cytoplasm,membrane	DNA binding,actin binding,protein binding,microtubule binding,SH3 domain binding,enzyme binding,apolipoprotein binding,dynactin binding,identical protein binding,protein homodimerization activity,receptor agonist activity,protein phosphatase 2A binding,Hsp90 protein binding,lipoprotein particle binding,microtubule lateral binding	microtubule cytoskeleton organization,microglial cell activation,activation of cysteine-type endopeptidase activity involved in apoptotic process,memory,regulation of receptor activity,regulation of autophagy,negative regulation of gene expression,negative regulation of mitochondrial membrane potential,axonal transport of mitochondrion,regulation of microtubule polymerization or depolymerization,…
1.34354	0.0747345	0.0295711	Q9NQS1	AVEN	Cell death regulator Aven	AVEN_HUMAN	2	intracellular,endomembrane system,membrane	protein binding	apoptotic process,negative regulation of apoptotic process
1.34316	4.68742e-13	1.12569e-12	O43426	SYNJ1	Synaptojanin-1	SYNJ1_HUMAN	24	cytosol,vesicle membrane,membrane coat,clathrin coat of coated pit,terminal bouton,perinuclear region of cytoplasm,synaptic membrane,presynapse,microtubule	RNA binding,phosphatidylinositol-3-phosphatase activity,phosphatidylinositol-4,5-bisphosphate 5-phosphatase activity,phosphatidylinositol phosphate 5-phosphatase activity,phosphatidylinositol phosphate 4-phosphatase activity,phosphatidylinositol-4-phosphate phosphatase activity,phosphatidylinositol-3,5-bisphosphate 5-phosphatase activity,phosphatidylinositol-3,5-bisphosphate 3-phosphatase activit…	phosphatidylinositol biosynthetic process,neurotransmitter transport,learning,synaptic vesicle priming,synaptic vesicle uncoating,phosphatidylinositol-3-phosphate biosynthetic process,inositol phosphate metabolic process,phosphatidylinositol metabolic process,inositol phosphate dephosphorylation,phosphatidylinositol dephosphorylation,synaptic vesicle endocytosis,synaptic vesicle transport,membran…
1.34131	0.675175	0.188186	O15511	ARPC5	Actin-related protein 2/3 complex subunit 5	ARPC5_HUMAN	3	extracellular region,cytoplasm,endosome,cytosol,Arp2/3 protein complex,focal adhesion,actin cytoskeleton,lamellipodium,growth cone,secretory granule lumen,extracellular exosome,ficolin-1-rich granule lumen	structural constituent of cytoskeleton,protein binding,actin filament binding	movement of cell or subcellular component,smooth muscle cell migration,cell migration,orbitofrontal cortex development,maintenance of cell polarity,actin cytoskeleton organization,Arp2/3 complex-mediated actin nucleation,Fc-gamma receptor signaling pathway involved in phagocytosis,neutrophil degranulation,ephrin receptor signaling pathway,actin filament network formation,membrane organization,Req…
1.3374	2.44663e-17	8.64657e-17	Q8TC07	TBC1D15	TBC1 domain family member 15	TBC15_HUMAN	19	intracellular,cytoplasm,mitochondrion,endomembrane system,extracellular exosome	GTPase activator activity,protein binding,Rab GTPase binding	intracellular protein transport,regulation of vesicle fusion,regulation of GTPase activity,activation of GTPase activity,regulation of cilium assembly
1.33394	0.205792	0.0699273	O75880	SCO1	Protein SCO1 homolog, mitochondrial	SCO1_HUMAN	1	mitochondrion,mitochondrial inner membrane,myofibril,host cell mitochondrial intermembrane space	copper ion binding,protein binding	generation of precursor metabolites and energy,copper ion transport,cellular copper ion homeostasis,respiratory chain complex IV assembly,mitochondrial respiratory chain complex IV assembly,negative regulation of proteasomal protein catabolic process
1.33331	0.0424019	0.0180961	Q9H871	RMND5A	Protein RMD5 homolog A	RMD5A_HUMAN	1	nucleus,cytoplasm,GID complex	protein binding,ubiquitin-protein transferase activity	protein ubiquitination involved in ubiquitin-dependent protein catabolic process,proteasome-mediated ubiquitin-dependent protein catabolic process
1.33268	0.218781	0.0736304	Q96C00	ZBTB9	Zinc finger and BTB domain-containing protein 9	ZBTB9_HUMAN	3	nucleus	DNA binding,protein binding,metal ion binding	transcription, DNA-templated,regulation of transcription, DNA-templated
1.3303	0.0118126	0.00596142	Q6ZW76	ANKS3	Ankyrin repeat and SAM domain-containing protein 3	ANKS3_HUMAN	1		protein binding
1.33025	0.354563	0.110536	Q9UFF9	CNOT8	CCR4-NOT transcription complex subunit 8	CNOT8_HUMAN	2	cytoplasmic mRNA processing body,intracellular,nucleus,cytosol,CCR4-NOT complex,CCR4-NOT core complex	3'-5'-exoribonuclease activity,transcription factor activity, sequence-specific DNA binding,RNA binding,poly(A)-specific ribonuclease activity,protein binding,metal ion binding	nuclear-transcribed mRNA poly(A) tail shortening,transcription, DNA-templated,regulation of transcription, DNA-templated,DNA damage response, signal transduction by p53 class mediator resulting in cell cycle arrest,positive regulation of cell proliferation,negative regulation of cell proliferation,gene silencing by miRNA,exonucleolytic nuclear-transcribed mRNA catabolic process involved in deaden…
1.33015	0.931328	0.24264	Q13434;Q9UHC7	MKRN4P;MKRN1	Putative E3 ubiquitin-protein ligase makorin-4;E3 ubiquitin-protein ligase makorin-1	MKRN4_HUMAN;MKRN1_HUMAN	1	;cellular_component,cytosol	transferase activity,metal ion binding;RNA binding,ubiquitin-protein transferase activity,protein binding,metal ion binding,ubiquitin protein ligase activity	protein ubiquitination;protein polyubiquitination,protein kinase B signaling
1.32823	0.251976	0.0830542	Q9C0A6	SETD5	SET domain-containing protein 5	SETD5_HUMAN	3	nucleus,nucleoplasm,Cdc73/Paf1 complex		transcription, DNA-templated,regulation of transcription, DNA-templated,chromatin modification,regulation of histone acetylation,regulation of chromatin organization
1.32626	4.51926e-19	1.82963e-18	Q9BRR8	GPATCH1	G patch domain-containing protein 1	GPTC1_HUMAN	20	catalytic step 2 spliceosome	nucleic acid binding	mRNA splicing, via spliceosome
1.3261	0.390622	0.119707	P05423	POLR3D	DNA-directed RNA polymerase III subunit RPC4	RPC4_HUMAN	5	nucleoplasm,DNA-directed RNA polymerase III complex,cytosol,nuclear speck,nuclear chromatin	DNA binding,chromatin binding,RNA polymerase III activity	transcription from RNA polymerase III promoter,positive regulation of type I interferon production,positive regulation of interferon-beta production,innate immune response,positive regulation of innate immune response,defense response to virus
1.32351	5.82477e-05	4.95687e-05	Q13371	PDCL	Phosducin-like protein	PHLP_HUMAN	7	cytoplasm,cytosol	receptor signaling protein activity,protein binding,protein complex binding,queuine tRNA-ribosyltransferase activity	protein folding,signal transduction,visual perception,regulation of G-protein coupled receptor protein signaling pathway,queuosine biosynthetic process,negative regulation of protein refolding,heterotrimeric G-protein complex assembly
1.32217	1.60021e-29	1.30951e-28	Q7Z4H7	HAUS6	HAUS augmin-like complex subunit 6	HAUS6_HUMAN	40	centrosome,microtubule organizing center,spindle,cytosol,microtubule,nuclear speck,HAUS complex	molecular_function,protein binding	G2/M transition of mitotic cell cycle,centrosome cycle,regulation of G2/M transition of mitotic cell cycle,spindle assembly,cell division,ciliary basal body docking
1.32154	5.23161e-11	1.00445e-10	Q8TBA6	GOLGA5	Golgin subfamily A member 5	GOGA5_HUMAN	30	Golgi membrane,Golgi apparatus,cis-Golgi network,membrane,integral component of membrane,transport vesicle,Golgi cisterna	Rab GTPase binding,protein homodimerization activity	retrograde transport, vesicle recycling within Golgi,Golgi organization,Golgi vesicle transport
1.32063	0.00439617	0.00249667	Q8N9N2	ASCC1	Activating signal cointegrator 1 complex subunit 1	ASCC1_HUMAN	7	nucleus,nucleoplasm,transcription factor complex,neuromuscular junction	RNA binding,protein binding	DNA dealkylation involved in DNA repair,transcription, DNA-templated,regulation of transcription, DNA-templated
1.32004	0.00288766	0.001718	Q96BN2	TADA1	Transcriptional adapter 1	TADA1_HUMAN	5	SAGA complex,nucleus,nucleoplasm,cytosol,focal adhesion,STAGA complex	transcription coactivator activity,histone acetyltransferase activity	transcription, DNA-templated,regulation of transcription from RNA polymerase II promoter,histone H3 acetylation
1.31604	9.59265e-09	1.40521e-08	Q9NRY4	ARHGAP35	Rho GTPase-activating protein 35	RHG35_HUMAN	20	nucleus,cytoplasm,cytosol,plasma membrane,actin cytoskeleton,ciliary basal body	RNA polymerase II regulatory region sequence-specific DNA binding,transcriptional repressor activity, RNA polymerase II transcription regulatory region sequence-specific binding,DNA binding,transcription corepressor activity,GTPase activity,GTPase activator activity,GTP binding,phospholipid binding	negative regulation of transcription from RNA polymerase II promoter,neural tube closure,transcription, DNA-templated,signal transduction,axon guidance,axonal fasciculation,regulation of actin polymerization or depolymerization,regulation of cell shape,positive regulation of neuron projection development,cell migration,central nervous system neuron axonogenesis,mammary gland development,forebrain…
1.3157	2.23175e-08	3.12381e-08	P10244	MYBL2	Myb-related protein B	MYBB_HUMAN	9	nucleus,nucleoplasm,Myb complex	RNA polymerase II core promoter proximal region sequence-specific DNA binding,transcriptional activator activity, RNA polymerase II core promoter proximal region sequence-specific binding,transcription factor activity, RNA polymerase II transcription factor recruiting,transcription factor activity, sequence-specific DNA binding,protein binding	regulation of transcription from RNA polymerase II promoter,transcription from RNA polymerase II promoter,cell differentiation,positive regulation of neuron apoptotic process,positive regulation of transcription from RNA polymerase II promoter,regulation of cell cycle,mitotic spindle assembly,cellular response to leukemia inhibitory factor
1.31509	1.41131e-07	1.79536e-07	Q8TEV9	SMCR8	Smith-Magenis syndrome chromosomal region candidate gene 8 protein	SMCR8_HUMAN	10	chromatin,nucleoplasm,cytoplasm,guanyl-nucleotide exchange factor complex,ATG1/ULK1 kinase complex	protein kinase inhibitor activity,protein binding,protein kinase binding,Rab guanyl-nucleotide exchange factor activity	transcription, DNA-templated,regulation of transcription, DNA-templated,negative regulation of protein kinase activity,autophagy,regulation of autophagy,negative regulation of gene expression,negative regulation of macroautophagy,positive regulation of TOR signaling,positive regulation of autophagosome maturation,negative regulation of autophagosome assembly,regulation of TORC1 signaling
1.31253	0.00274639	0.00164349	Q8IWB9	TEX2	Testis-expressed sequence 2 protein	TEX2_HUMAN	3	endoplasmic reticulum,integral component of membrane	molecular_function,lipid binding	sphingolipid metabolic process,signal transduction
1.31203	2.71476e-16	8.79262e-16	O75182	SIN3B	Paired amphipathic helix protein Sin3b	SIN3B_HUMAN	24	X chromosome,Y chromosome,XY body,nucleus,nucleoplasm,cytoplasm,Sin3 complex,autosome	RNA polymerase II transcription corepressor activity,chromatin binding,protein binding,histone deacetylase activity	negative regulation of transcription from RNA polymerase II promoter,transcription, DNA-templated,histone deacetylation,regulation of lipid metabolic process
1.31193	4.24708e-14	1.13512e-13	Q86WR0	CCDC25	Coiled-coil domain-containing protein 25	CCD25_HUMAN	10	extracellular exosome	protein binding
1.31065	5.15532e-06	5.18369e-06	Q92560	BAP1	Ubiquitin carboxyl-terminal hydrolase BAP1	BAP1_HUMAN	3	nucleus,nucleoplasm,cytoplasm,cytosol,PR-DUB complex	chromatin binding,thiol-dependent ubiquitin-specific protease activity,protein binding,peptidase activity,thiol-dependent ubiquitinyl hydrolase activity	regulation of cell growth,cellular protein modification process,ubiquitin-dependent protein catabolic process,negative regulation of cell proliferation,response to inorganic substance,protein deubiquitination,monoubiquitinated protein deubiquitination,monoubiquitinated histone H2A deubiquitination,regulation of cell cycle,macrophage homeostasis,protein K48-linked deubiquitination,regulation of cy…
1.30937	0.000255371	0.00019286	P13984	GTF2F2	General transcription factor IIF subunit 2	T2FB_HUMAN	6	nucleus,nucleoplasm,transcription factor TFIIF complex,microtubule cytoskeleton,transcriptional preinitiation complex	transcription factor activity, core RNA polymerase II binding,DNA binding,helicase activity,protein binding,ATP binding	mRNA splicing, via spliceosome,transcription from RNA polymerase II promoter,transcription initiation from RNA polymerase II promoter,transcription elongation from RNA polymerase II promoter,7-methylguanosine mRNA capping,fibroblast growth factor receptor signaling pathway,RNA metabolic process,positive regulation of transcription elongation from RNA polymerase II promoter,snRNA transcription fro…
1.30923	5.09281e-12	1.08469e-11	Q16630	CPSF6	Cleavage and polyadenylation specificity factor subunit 6	CPSF6_HUMAN	8	nucleus,nucleoplasm,mRNA cleavage factor complex,membrane,nuclear speck,intracellular ribonucleoprotein complex,paraspeckles	RNA binding,mRNA binding,protein binding	mRNA polyadenylation,mRNA processing,protein tetramerization
1.30735	0.0656058	0.0264241	P20936	RASA1	Ras GTPase-activating protein 1	RASA1_HUMAN	1	ruffle,cytoplasm,cytosol,intrinsic component of the cytoplasmic side of the plasma membrane	phosphotyrosine binding,GTPase activity,GTPase activator activity,receptor binding,protein binding,potassium channel inhibitor activity,GTPase binding	MAPK cascade,mitotic cytokinesis,vasculogenesis,negative regulation of cell-matrix adhesion,negative regulation of cell adhesion,signal transduction,regulation of cell shape,embryo development,regulation of actin filament polymerization,intracellular signal transduction,negative regulation of apoptotic process,negative regulation of neuron apoptotic process,positive regulation of GTPase activity,…
1.30555	1.34148e-05	1.2613e-05	Q9H4L5	OSBPL3	Oxysterol-binding protein-related protein 3	OSBL3_HUMAN	10	endoplasmic reticulum membrane,cytosol,plasma membrane,membrane,nuclear membrane,filopodium tip,perinuclear endoplasmic reticulum	protein binding,sterol transporter activity,cholesterol binding	bile acid biosynthetic process,sterol transport
1.29788	0.0391428	0.0168817	P35240	NF2	Merlin	MERL_HUMAN	7	nucleus,nucleolus,cytoplasm,early endosome,cytosol,cytoskeleton,plasma membrane,adherens junction,membrane,lamellipodium,cortical actin cytoskeleton,filopodium membrane,cleavage furrow,ruffle membrane,neuron projection,cell body,apical part of cell,perinuclear region of cytoplasm	actin binding,protein binding	mesoderm formation,negative regulation of cell-matrix adhesion,negative regulation of protein kinase activity,ectoderm development,negative regulation of DNA replication,negative regulation of cell proliferation,Schwann cell proliferation,regulation of gliogenesis,hippocampus development,negative regulation of cell-cell adhesion,actin cytoskeleton organization,negative regulation of cell migratio…
1.29732	0.0236679	0.0109179	P51970	NDUFA8	NADH dehydrogenase [ubiquinone] 1 alpha subcomplex subunit 8	NDUA8_HUMAN	2	mitochondrion,mitochondrial inner membrane,mitochondrial respiratory chain complex I,mitochondrial intermembrane space	NADH dehydrogenase (ubiquinone) activity,protein complex binding	mitochondrial electron transport, NADH to ubiquinone,mitochondrial respiratory chain complex I assembly
1.2968	6.29604e-10	1.06123e-09	Q15691	MAPRE1	Microtubule-associated protein RP/EB family member 1	MARE1_HUMAN	8	Golgi apparatus,centrosome,cytosol,microtubule,cytoplasmic microtubule,cortical microtubule cytoskeleton,cell projection membrane,microtubule plus-end,spindle	RNA binding,protein binding,protein C-terminus binding,protein kinase binding,identical protein binding,cadherin binding,microtubule plus-end binding	G2/M transition of mitotic cell cycle,sister chromatid cohesion,protein localization,cell proliferation,regulation of G2/M transition of mitotic cell cycle,positive regulation of cell migration,negative regulation of microtubule polymerization,protein localization to microtubule,cell division,ciliary basal body docking,positive regulation of microtubule plus-end binding,negative regulation of mic…
1.29126	0.010817	0.00552806	Q5JTD0	TJAP1	Tight junction-associated protein 1	TJAP1_HUMAN	2	endosome,Golgi apparatus,trans-Golgi network,plasma membrane,bicellular tight junction	protein binding	Golgi organization
1.29102	0.0823507	0.0321005	Q9H0C8	ILKAP	Integrin-linked kinase-associated serine/threonine phosphatase 2C	ILKAP_HUMAN	2	nucleus,nucleoplasm,cytosol	protein serine/threonine phosphatase activity,protein binding,metal ion binding	protein dephosphorylation
1.2898	0.00538314	0.00298562	Q5BJF6	ODF2	Outer dense fiber protein 2	ODFP2_HUMAN	27	spindle pole,outer dense fiber,nucleus,centrosome,centriole,cytosol,microtubule,ciliary transition fiber,Requires Ontology	structural molecule activity,protein binding	G2/M transition of mitotic cell cycle,multicellular organism development,spermatid development,protein localization,regulation of G2/M transition of mitotic cell cycle,centriole-centriole cohesion,ciliary basal body docking
1.28858	0.421989	0.127568	O60313	OPA1	Dynamin-like 120 kDa protein, mitochondrial	OPA1_HUMAN	2	nucleoplasm,mitochondrion,mitochondrial outer membrane,mitochondrial inner membrane,mitochondrial intermembrane space,cytosol,membrane,integral component of membrane,mitochondrial crista,dendrite,extrinsic component of mitochondrial inner membrane,axon cytoplasm	magnesium ion binding,GTPase activity,protein binding,GTP binding,microtubule binding,kinase binding,phosphatidic acid binding,cardiolipin binding	mitochondrial genome maintenance,mitochondrial fission,dynamin family protein polymerization involved in mitochondrial fission,apoptotic process,mitochondrion organization,inner mitochondrial membrane organization,visual perception,mitochondrial fusion,positive regulation of mitochondrial fusion,positive regulation of neuron maturation,response to muscle activity,axonal transport of mitochondrion…
1.28774	5.31946e-07	6.1736e-07	Q9H1H9	KIF13A	Kinesin-like protein KIF13A	KI13A_HUMAN	7	centrosome,kinesin complex,microtubule,endosome membrane,midbody,trans-Golgi network membrane	microtubule motor activity,protein binding,ATP binding,microtubule binding,ATPase activity	cytokinesis,intracellular protein transport,microtubule-based movement,endosome to lysosome transport,cytoskeleton-dependent intracellular transport,melanosome organization,cargo loading into vesicle,Golgi to plasma membrane protein transport,plus-end-directed vesicle transport along microtubule
1.28633	0.00696096	0.00375069	Q6ZWJ1	STXBP4	Syntaxin-binding protein 4	STXB4_HUMAN	7	phagocytic vesicle,extracellular exosome	protein binding,syntaxin binding	protein targeting,cellular response to DNA damage stimulus,insulin receptor signaling pathway,positive regulation of keratinocyte proliferation,glucose transport,protein stabilization,regulation of insulin secretion involved in cellular response to glucose stimulus,cellular response to interferon-gamma,positive regulation of cell cycle G1/S phase transition
1.2859	0.0687517	0.027515	O94864	SUPT7L	STAGA complex 65 subunit gamma	ST65G_HUMAN	3	nucleus,nucleoplasm,STAGA complex	transcription coactivator activity,protein binding,histone acetyltransferase activity	transcription, DNA-templated,regulation of transcription, DNA-templated,histone H3 acetylation,maintenance of protein location in nucleus
1.28523	1.41035e-09	2.27819e-09	P39880	CUX1	Homeobox protein cut-like 1	CUX1_HUMAN	28	Golgi membrane,nucleus,nucleoplasm,Golgi apparatus,cytosol	RNA polymerase II regulatory region sequence-specific DNA binding,protein tyrosine kinase activity,protein binding, bridging,sequence-specific DNA binding	negative regulation of transcription from RNA polymerase II promoter,retrograde transport, vesicle recycling within Golgi,transcription, DNA-templated,regulation of transcription from RNA polymerase II promoter,multicellular organism development,peptidyl-tyrosine phosphorylation,Golgi vesicle transport,positive regulation of dendrite morphogenesis
1.28509	0.182702	0.0632702	Q13443	ADAM9	Disintegrin and metalloproteinase domain-containing protein 9	ADAM9_HUMAN	1	extracellular space,focal adhesion,cell surface,integral component of membrane,basolateral plasma membrane,intrinsic component of external side of plasma membrane,extracellular exosome	metalloendopeptidase activity,protein kinase C binding,integrin binding,protein binding,collagen binding,metallopeptidase activity,SH3 domain binding,laminin binding,metal ion binding	activation of MAPKK activity,membrane protein ectodomain proteolysis,cell adhesion,cell-matrix adhesion,transforming growth factor beta receptor signaling pathway,integrin-mediated signaling pathway,response to manganese ion,cell migration,keratinocyte differentiation,cell adhesion mediated by integrin,positive regulation of cell adhesion mediated by integrin,cell-cell adhesion mediated by integr…
1.28328	0.000172624	0.000134361	Q92733	PRCC	Proline-rich protein PRCC	PRCC_HUMAN	6	nucleus,nucleoplasm,nuclear speck	protein binding	mRNA splicing, via spliceosome,mitotic cell cycle checkpoint
1.28257	0.000228134	0.000174002	Q96S94	CCNL2	Cyclin-L2	CCNL2_HUMAN	3	cyclin-dependent protein kinase holoenzyme complex,nucleus,nucleoplasm,nuclear speck,intracellular membrane-bounded organelle	protein binding,cyclin-dependent protein serine/threonine kinase regulator activity	transcription, DNA-templated,positive regulation of cyclin-dependent protein serine/threonine kinase activity,positive regulation of transcription from RNA polymerase II promoter,positive regulation of phosphorylation of RNA polymerase II C-terminal domain
1.28255	0.255291	0.0839809	P02461	COL3A1	Collagen alpha-1(III) chain	CO3A1_HUMAN	1	extracellular region,collagen type III trimer,extracellular space,endoplasmic reticulum lumen,extracellular matrix	protease binding,integrin binding,extracellular matrix structural constituent,protein binding,SMAD binding,metal ion binding,platelet-derived growth factor binding	skeletal system development,cell-matrix adhesion,transforming growth factor beta receptor signaling pathway,integrin-mediated signaling pathway,heart development,aging,response to radiation,response to mechanical stimulus,peptide cross-linking,cerebral cortex development,platelet activation,extracellular matrix organization,collagen fibril organization,collagen catabolic process,response to cytok…
1.28181	2.30664e-32	2.17515e-31	Q9UBC2	EPS15L1	Epidermal growth factor receptor substrate 15-like 1	EP15R_HUMAN	45	nucleus,cytosol,plasma membrane,membrane,clathrin coat of coated pit	calcium ion binding,protein binding,cadherin binding	endocytosis,negative regulation of epidermal growth factor receptor signaling pathway,membrane organization
1.28173	1.8452e-41	2.58462e-40	Q7LBC6	KDM3B	Lysine-specific demethylase 3B	KDM3B_HUMAN	41	chromatin,nucleus,nucleoplasm	transcription regulatory region sequence-specific DNA binding,antioxidant activity,chromatin DNA binding,histone demethylase activity,histone demethylase activity (H3-K9 specific),metal ion binding,dioxygenase activity	transcription, DNA-templated,regulation of transcription, DNA-templated,histone H3-K9 demethylation,oxidation-reduction process,response to cisplatin,cellular oxidant detoxification
1.28007	0.000563809	0.000396609	Q9H1K0	RBSN	Rabenosyn-5	RBNS5_HUMAN	4	endosome,cytosol,plasma membrane,endosome membrane,cytoplasmic side of endosome membrane,early endosome membrane,intracellular membrane-bounded organelle,extracellular exosome	nucleic acid binding,protein binding,zinc ion binding,Rab GTPase binding	vacuole inheritance,Golgi to endosome transport,endocytosis,blood coagulation,protein transport,endosomal transport,endosomal vesicle fusion,early endosome to Golgi transport,Golgi to lysosome transport,regulation of Golgi organization
1.27771	0.0306264	0.0135889	Q9BRA0	NAA38	N-alpha-acetyltransferase 38, NatC auxiliary subunit	LSMD1_HUMAN	2	nucleus,cytoplasm,NatC complex,polysome	protein binding	negative regulation of apoptotic process
1.27748	0.0197397	0.00932329	O00287	RFXAP	Regulatory factor X-associated protein	RFXAP_HUMAN	1	nucleus,nuclear speck	DNA binding,transcription factor activity, sequence-specific DNA binding,transcription coactivator activity	positive regulation of transcription, DNA-templated
1.27649	6.09575e-06	6.06559e-06	O15013	ARHGEF10	Rho guanine nucleotide exchange factor 10	ARHGA_HUMAN	14	centrosome,cytosol	Rho guanyl-nucleotide exchange factor activity,protein binding,kinesin binding	myelination in peripheral nervous system,regulation of Rho protein signal transduction,centrosome duplication,positive regulation of stress fiber assembly,mitotic spindle assembly,activation of GTPase activity
1.2763	0.00896307	0.00469564	Q92530	PSMF1	Proteasome inhibitor PI31 subunit	PSMF1_HUMAN	2	nucleoplasm,endoplasmic reticulum,cytosol,proteasome core complex,membrane,perinuclear region of cytoplasm	endopeptidase inhibitor activity,protein binding,protein homodimerization activity,protein heterodimerization activity,proteasome binding	MAPK cascade,protein polyubiquitination,stimulatory C-type lectin receptor signaling pathway,antigen processing and presentation of exogenous peptide antigen via MHC class I, TAP-dependent,ubiquitin-dependent protein catabolic process,regulation of cellular amino acid metabolic process,negative regulation of endopeptidase activity,negative regulation of G2/M transition of mitotic cell cycle,prote…
1.27592	1.6697e-17	6.00591e-17	O75410	TACC1	Transforming acidic coiled-coil-containing protein 1	TACC1_HUMAN	19	nucleus,cytoplasm,microtubule organizing center,microtubule cytoskeleton,membrane,midbody	protein binding	microtubule cytoskeleton organization,cell cycle,cell proliferation,cerebral cortex development,cell division
1.27571	1.44609e-08	2.06975e-08	Q96L93	KIF16B	Kinesin-like protein KIF16B	KI16B_HUMAN	18	endosome,early endosome,cytosol,kinesin complex,microtubule,early endosome membrane,phagocytic vesicle	ATP binding,phosphatidylinositol-3,4,5-trisphosphate binding,microtubule binding,ATP-dependent microtubule motor activity, plus-end-directed,Rab GTPase binding,phosphatidylinositol-3-phosphate binding,phosphatidylinositol-3,4-bisphosphate binding,phosphatidylinositol-3,5-bisphosphate binding	formation of primary germ layer,regulation of receptor recycling,Golgi to endosome transport,microtubule-based movement,epidermal growth factor receptor signaling pathway,endoderm development,fibroblast growth factor receptor signaling pathway,receptor catabolic process,early endosome to late endosome transport,cellular response to interferon-gamma
1.27414	0.00757648	0.0040421	Q7L775	EPM2AIP1	EPM2A-interacting protein 1	EPMIP_HUMAN	1	nucleoplasm,cytoplasm,endoplasmic reticulum	RNA polymerase II transcription factor activity, sequence-specific DNA binding,DNA binding,protein binding,identical protein binding	regulation of transcription from RNA polymerase II promoter,response to insulin,positive regulation of glycogen biosynthetic process,positive regulation of glycogen (starch) synthase activity
1.27232	2.43301e-15	7.31809e-15	Q9UBF2	COPG2	Coatomer subunit gamma-2	COPG2_HUMAN	34	Golgi membrane,endoplasmic reticulum membrane,cytosol,COPI vesicle coat,transport vesicle	structural molecule activity	intracellular protein transport,ER to Golgi vesicle-mediated transport,retrograde vesicle-mediated transport, Golgi to ER,intra-Golgi vesicle-mediated transport
1.27195	0.000131163	0.000104311	Q9H1I8	ASCC2	Activating signal cointegrator 1 complex subunit 2	ASCC2_HUMAN	6	nucleus,nucleoplasm,activating signal cointegrator 1 complex		DNA dealkylation involved in DNA repair,transcription, DNA-templated,regulation of transcription, DNA-templated
1.2687	0.00683138	0.00368862	Q96C92	SDCCAG3	Serologically defined colon cancer antigen 3	SDCG3_HUMAN	14	endosome,early endosome,midbody,recycling endosome,retromer complex	protein binding	cell cycle,protein transport,regulation of cytokinesis,cell division,retrograde transport, endosome to plasma membrane
1.26688	0.00196895	0.00122262	Q96S53	TESK2	Dual specificity testis-specific protein kinase 2	TESK2_HUMAN	1	nucleus,nucleoplasm,cytoplasm,nuclear body	protein kinase activity,protein serine/threonine kinase activity,protein serine/threonine/tyrosine kinase activity,protein tyrosine kinase activity,signal transducer activity,protein binding,ATP binding,metal ion binding	protein phosphorylation,spermatogenesis,peptidyl-tyrosine phosphorylation,actin cytoskeleton organization,intracellular signal transduction,focal adhesion assembly
1.2667	0.225486	0.0756093	P11474	ESRRA	Steroid hormone receptor ERR1	ERR1_HUMAN	3	fibrillar center,nucleus,nucleoplasm,microtubule cytoskeleton,intercellular bridge	RNA polymerase II core promoter proximal region sequence-specific DNA binding,transcriptional activator activity, RNA polymerase II core promoter proximal region sequence-specific binding,transcriptional repressor activity, RNA polymerase II core promoter proximal region sequence-specific binding,DNA binding,steroid hormone receptor activity,RNA polymerase II transcription factor activity, ligand…	negative regulation of transcription from RNA polymerase II promoter,regulation of transcription, DNA-templated,transcription initiation from RNA polymerase II promoter,mitochondrion organization,intracellular receptor signaling pathway,response to estradiol,regulation of cell proliferation,steroid hormone mediated signaling pathway,regulation of osteoblast differentiation,regulation of osteoclas…
1.26641	0.00077365	0.000527776	Q15390	MTFR1	Mitochondrial fission regulator 1	MTFR1_HUMAN	3	mitochondrion,cytosol,plasma membrane		mitochondrial fission,mitochondrion organization,aerobic respiration
1.26461	4.43881e-11	8.60411e-11	Q9H792	PEAK1	Pseudopodium-enriched atypical kinase 1	PEAK1_HUMAN	15	cytoplasm,focal adhesion,actin cytoskeleton	non-membrane spanning protein tyrosine kinase activity,protein binding,ATP binding	cell migration,peptidyl-tyrosine phosphorylation,substrate adhesion-dependent cell spreading,protein autophosphorylation
1.26459	0.00236899	0.00144069	Q96S38	RPS6KC1	Ribosomal protein S6 kinase delta-1	KS6C1_HUMAN	2	early endosome,membrane	protein serine/threonine kinase activity,protein binding,ATP binding,phosphatidylinositol binding	protein phosphorylation,signal transduction
1.26446	0.029502	0.0131685	Q16143	SNCB	Beta-synuclein	SYUB_HUMAN	1	mitochondrion,cytosol,inclusion body,synapse	phospholipase inhibitor activity,calcium ion binding,transition metal ion binding,cuprous ion binding	chemical synaptic transmission,response to metal ion,dopamine metabolic process,negative regulation of catalytic activity,negative regulation of neuron apoptotic process,synapse organization
1.26226	0.0141888	0.00700406	Q96RF0	SNX18	Sorting nexin-18	SNX18_HUMAN	2	endosome membrane,cytoplasmic vesicle membrane,extrinsic component of cytoplasmic side of plasma membrane,cytoplasmic vesicle,extracellular exosome,clathrin-coated vesicle	protein binding,phosphatidylinositol-4,5-bisphosphate binding	mitotic cytokinesis,endocytosis,protein transport,endosomal transport,cleavage furrow formation,positive regulation of GTPase activity
1.26193	4.62438e-16	1.47167e-15	P35611	ADD1	Alpha-adducin	ADDA_HUMAN	21	nucleus,nucleoplasm,cytoplasm,cytosol,plasma membrane,cell-cell adherens junction,focal adhesion,F-actin capping protein complex,nuclear body	RNA binding,actin binding,structural molecule activity,calmodulin binding,transcription factor binding,spectrin binding,protein homodimerization activity,cadherin binding,protein heterodimerization activity,actin filament binding	cell morphogenesis,in utero embryonic development,cell volume homeostasis,hemoglobin metabolic process,actin cytoskeleton organization,erythrocyte differentiation,positive regulation of protein binding,multicellular organism growth,IRE1-mediated unfolded protein response,homeostasis of number of cells within a tissue,barbed-end actin filament capping,actin filament bundle assembly,transmembrane t…
1.26158	0.00684748	0.00369525	P84090	ERH	Enhancer of rudimentary homolog	ERH_HUMAN	2	midbody,methylosome	RNA binding,protein binding,methyl-CpG binding	nucleobase-containing compound metabolic process,pyrimidine nucleoside metabolic process,pyrimidine nucleotide biosynthetic process,cell cycle,positive regulation of Notch signaling pathway
1.26041	8.27698e-10	1.37818e-09	Q8IW35	CEP97	Centrosomal protein of 97 kDa	CEP97_HUMAN	17	centrosome,microtubule organizing center,cytosol,protein complex	protein binding,calmodulin binding	ciliary basal body docking,regulation of mitotic spindle assembly,negative regulation of cilium assembly
1.25931	0.00168552	0.00106556	P35606	COPB2	Coatomer subunit beta'	COPB2_HUMAN	4	Golgi membrane,endoplasmic reticulum membrane,cytosol,COPI vesicle coat,transport vesicle	structural molecule activity,protein binding	intracellular protein transport,ER to Golgi vesicle-mediated transport,retrograde vesicle-mediated transport, Golgi to ER,intra-Golgi vesicle-mediated transport,toxin transport
1.25792	0.0146569	0.00720458	Q8N2M8	CLASRP	CLK4-associating serine/arginine rich protein	CLASR_HUMAN	1	nucleus,nucleoplasm	protein binding	mRNA processing,RNA splicing
1.2577	3.29683e-08	4.52548e-08	O94967	WDR47	WD repeat-containing protein 47	WDR47_HUMAN	3	cytoplasm,microtubule	protein binding	multicellular organism development
1.25381	0.112618	0.0418015	Q96LT7	C9orf72	Protein C9orf72	CI072_HUMAN	5	cytoplasmic mRNA processing body,extracellular space,nucleus,cytoplasm,lysosome,endosome,autophagosome,cytoplasmic stress granule,dendrite,nuclear membrane,guanyl-nucleotide exchange factor complex,perikaryon,axonal growth cone,main axon,ATG1/ULK1 kinase complex	protein binding,Rab GTPase binding,Rab guanyl-nucleotide exchange factor activity	negative regulation of protein phosphorylation,endocytosis,autophagy,regulation of autophagy,positive regulation of macroautophagy,stress granule assembly,axon extension,regulation of molecular function,Requires Ontology,late endosome to lysosome transport,regulation of TORC1 signaling,regulation of autophagosome assembly
1.2535	3.6438e-06	3.7483e-06	Q8TEK3	DOT1L	Histone-lysine N-methyltransferase, H3 lysine-79 specific	DOT1L_HUMAN	9	chromosome, telomeric region,nucleus,nucleoplasm,intracellular membrane-bounded organelle,protein complex	DNA binding,protein binding,histone-lysine N-methyltransferase activity,histone methyltransferase activity (H3-K79 specific),histone methyltransferase activity	DNA damage checkpoint,DNA repair,chromatin silencing at telomere,positive regulation of cell proliferation,telomere organization,histone H3-K79 methylation,positive regulation of transcription from RNA polymerase II promoter,regulation of JAK-STAT cascade,regulation of transcription regulatory region DNA binding
1.25251	2.82764e-06	2.96597e-06	P55327	TPD52	Tumor protein D52	TPD52_HUMAN	4	cytoplasm,endoplasmic reticulum,perinuclear region of cytoplasm	calcium ion binding,protein binding,protein homodimerization activity,protein heterodimerization activity	anatomical structure morphogenesis,B cell differentiation,secretion
1.2484	0.094454	0.0360495	Q9UBI9	HECA	Headcase protein homolog	HDC_HUMAN	2	nucleus,cytoplasm,membrane	molecular_function	respiratory tube development,negative regulation of mitotic cell cycle
1.24741	0.0848698	0.0329453	P42771;P42772	CDKN2A;CDKN2B	Cyclin-dependent kinase inhibitor 2A;Cyclin-dependent kinase 4 inhibitor B	CDN2A_HUMAN;CDN2B_HUMAN	1	nucleus,cytoplasm,cytosol,senescence-associated heterochromatin focus;nucleus,cytoplasm,cytosol	RNA binding,cyclin-dependent protein serine/threonine kinase inhibitor activity,protein binding,protein kinase binding,NF-kappaB binding;cyclin-dependent protein serine/threonine kinase inhibitor activity,protein binding,protein kinase binding	G1/S transition of mitotic cell cycle,negative regulation of cell-matrix adhesion,cell cycle arrest,Ras protein signal transduction,negative regulation of cell proliferation,negative regulation of cell growth,negative regulation of NF-kappaB transcription factor activity,positive regulation of smooth muscle cell apoptotic process,senescence-associated heterochromatin focus assembly,negative regul…
1.24592	0.000122192	9.78248e-05	Q6I9Y2	THOC7	THO complex subunit 7 homolog	THOC7_HUMAN	6	transcription export complex,THO complex,THO complex part of transcription export complex,nucleus,nucleoplasm,cytoplasm,cytosol,nuclear speck,nuclear chromosome, telomeric region	RNA binding,protein binding	termination of RNA polymerase II transcription,RNA export from nucleus,mRNA export from nucleus,RNA splicing,mRNA 3'-end processing,viral mRNA export from host cell nucleus
1.24504	0.334466	0.105168	Q7L3S4	ZNF771	Zinc finger protein 771	ZN771_HUMAN	1	nucleus,nucleolus	DNA binding,metal ion binding	transcription, DNA-templated,regulation of transcription, DNA-templated
1.24218	0.00055269	0.000389573	Q8N157	AHI1	Jouberin	AHI1_HUMAN	4	centrosome,centriole,cytosol,cell-cell junction,adherens junction,cilium,MKS complex,ciliary basal body,Requires Ontology	protein binding,identical protein binding	morphogenesis of a polarized epithelium,heart looping,positive regulation of receptor internalization,transmembrane receptor protein tyrosine kinase signaling pathway,central nervous system development,retina layer formation,vesicle-mediated transport,positive regulation of polarized epithelial cell differentiation,hindbrain development,cellular protein localization,cloaca development,photorecept…
1.24151	0.000682858	0.000471793	P46736	BRCC3	Lys-63-specific deubiquitinase BRCC36	BRCC3_HUMAN	4	ubiquitin ligase complex,nuclear ubiquitin ligase complex,spindle pole,nucleus,nucleoplasm,cytoplasm,cytosol,BRCA1-A complex,BRISC complex	thiol-dependent ubiquitin-specific protease activity,protein binding,metallopeptidase activity,enzyme regulator activity,polyubiquitin binding,thiol-dependent ubiquitinyl hydrolase activity,metal ion binding,Lys63-specific deubiquitinase activity	double-strand break repair,double-strand break repair via nonhomologous end joining,cell cycle,response to X-ray,response to ionizing radiation,protein deubiquitination,positive regulation of DNA repair,regulation of catalytic activity,cell division,protein K63-linked deubiquitination,histone H2A K63-linked deubiquitination,signal transduction involved in G2 DNA damage checkpoint
1.24074	0.0170076	0.00819836	O43815	STRN	Striatin	STRN_HUMAN	14	cytoplasm,bicellular tight junction,postsynaptic density,membrane,neuronal cell body,dendritic spine,postsynaptic membrane,protein phosphatase type 2A complex	protein binding,calmodulin binding,estrogen receptor binding,protein complex binding,protein phosphatase 2A binding,armadillo repeat domain binding	locomotory behavior,negative regulation of cell proliferation,Wnt signaling pathway,dendrite development,bicellular tight junction assembly
1.23722	0.129787	0.0472468	Q9Y6D9	MAD1L1	Mitotic spindle assembly checkpoint protein MAD1	MD1L1_HUMAN	1	kinetochore,condensed chromosome kinetochore,centrosome,spindle,cytosol,mitotic spindle,nuclear envelope,nuclear pore,mitotic spindle pole	protein binding,identical protein binding,kinetochore binding	sister chromatid cohesion,mitotic cell cycle checkpoint,mitotic spindle assembly checkpoint,negative regulation of T cell proliferation,thymus development,cell division,attachment of mitotic spindle microtubules to kinetochore,regulation of metaphase plate congression
1.23718	0.302504	0.0967427	Q15027	ACAP1	Arf-GAP with coiled-coil, ANK repeat and PH domain-containing protein 1	ACAP1_HUMAN	1	membrane,recycling endosome membrane	GTPase activator activity,protein binding,metal ion binding	protein transport,positive regulation of GTPase activity
1.23666	0.0477354	0.0200535	Q9NX78	TMEM260	Transmembrane protein 260	TM260_HUMAN	1	integral component of membrane
1.23615	4.10386e-05	3.58375e-05	P28715	ERCC5	DNA repair protein complementing XP-G cells	ERCC5_HUMAN	3	nucleus,nucleoplasm,DNA replication factor A complex,holo TFIIH complex,DNA-directed RNA polymerase II, holoenzyme	bubble DNA binding,double-stranded DNA binding,single-stranded DNA binding,endodeoxyribonuclease activity,protein binding,protein homodimerization activity,metal ion binding,protein N-terminus binding	transcription-coupled nucleotide-excision repair,nucleotide-excision repair, preincision complex stabilization,nucleotide-excision repair, preincision complex assembly,nucleotide-excision repair, DNA incision, 3'-to lesion,nucleotide-excision repair, DNA incision, 5'-to lesion,response to UV,UV protection,response to UV-C,nucleotide-excision repair, DNA incision,negative regulation of apoptotic p…
1.236	3.55899e-27	2.47453e-26	O60271	SPAG9	C-Jun-amino-terminal kinase-interacting protein 4	JIP4_HUMAN	48	acrosomal vesicle,cytoplasm,microtubule organizing center,cytosol,integral component of membrane,perinuclear region of cytoplasm,extracellular exosome	MAP-kinase scaffold activity,protein binding,JUN kinase binding,kinesin binding,receptor signaling complex scaffold activity,mitogen-activated protein kinase p38 binding	activation of JUN kinase activity,spermatogenesis,positive regulation of cell migration,retrograde transport, endosome to Golgi,positive regulation of neuron differentiation,striated muscle cell differentiation,positive regulation of muscle cell differentiation,protein homooligomerization,negative regulation of protein homodimerization activity
1.23569	8.1616e-16	2.56546e-15	Q9H6T3	RPAP3	RNA polymerase II-associated protein 3	RPAP3_HUMAN	26	cytosol,R2TP complex	protein binding
1.23496	2.83318e-09	4.42203e-09	Q7Z2K8	GPRIN1	G protein-regulated inducer of neurite outgrowth 1	GRIN1_HUMAN	9	plasma membrane,growth cone		neuron projection development
1.23419	0.0093682	0.00488388	P49773	HINT1	Histidine triad nucleotide-binding protein 1	HINT1_HUMAN	4	histone deacetylase complex,nucleus,cytosol,cytoskeleton,plasma membrane,extracellular exosome	nucleotide binding,protein kinase C binding,hydrolase activity	transcription, DNA-templated,regulation of transcription, DNA-templated,signal transduction,purine ribonucleotide catabolic process,positive regulation of calcium-mediated signaling,intrinsic apoptotic signaling pathway by p53 class mediator
1.23273	0.0243573	0.0111822	Q13164	MAPK7	Mitogen-activated protein kinase 7	MK07_HUMAN	8	nucleus,nucleoplasm,cytoplasm,cytosol,PML body	protein serine/threonine kinase activity,MAP kinase activity,protein binding,ATP binding,mitogen-activated protein kinase binding	MAPK cascade,cell cycle,signal transduction,axon guidance,peptidyl-serine phosphorylation,cAMP-mediated signaling,negative regulation of cAMP catabolic process,negative regulation of heterotypic cell-cell adhesion,positive regulation of transcription from RNA polymerase II promoter in response to stress,negative regulation of MAP kinase activity,regulation of angiogenesis,positive regulation of t…
1.231	0.120546	0.0443446	Q8IYB1	MB21D2	Protein MB21D2	M21D2_HUMAN	4		protein complex binding,cadherin binding
1.22955	0.00510344	0.00284778	Q5VSY0	GKAP1	G kinase-anchoring protein 1	GKAP1_HUMAN	2	Golgi apparatus	protein binding,identical protein binding	signal transduction
1.22893	8.42571e-07	9.56176e-07	Q5PRF9	SAMD4B	Protein Smaug homolog 2	SMAG2_HUMAN	3	cytoplasmic mRNA processing body,nucleus,cytosol	RNA binding,mRNA binding,translation repressor activity	nuclear-transcribed mRNA poly(A) tail shortening,transcription, DNA-templated,regulation of transcription, DNA-templated,negative regulation of translation,regulation of mRNA stability
1.2278	0.0531429	0.0219433	Q15464	SHB	SH2 domain-containing adapter protein B	SHB_HUMAN	1	nucleoplasm,cytosol,plasma membrane,cytoplasmic ribonucleoprotein granule	phosphotyrosine binding,SH3/SH2 adaptor activity,protein binding	angiogenesis,apoptotic process,signal transduction,positive regulation of signal transduction,cell differentiation,vascular endothelial growth factor receptor signaling pathway
1.22477	0.012694	0.00634455	Q5TAQ9	DCAF8	DDB1- and CUL4-associated factor 8	DCAF8_HUMAN	1	nucleus,nucleoplasm,cytoplasm,mitochondrion,cytosol,Cul4-RING E3 ubiquitin ligase complex	protein binding	protein ubiquitination,post-translational protein modification
1.22375	2.87591e-74	1.31402e-72	Q8NG31	CASC5	Protein CASC5	CASC5_HUMAN	53	condensed chromosome kinetochore,acrosomal vesicle,nucleus,nucleoplasm,cytosol,nuclear body,extracellular exosome	protein binding	acrosome assembly,sister chromatid cohesion,attachment of spindle microtubules to kinetochore,negative regulation of phosphatase activity,CENP-A containing nucleosome assembly,protein localization to kinetochore,cell division
1.22374	0.0229441	0.0106262	Q92917	GPKOW	G patch domain and KOW motifs-containing protein	GPKOW_HUMAN	6	nucleus,nucleoplasm,spliceosomal complex	molecular_function,RNA binding,protein binding	mRNA splicing, via spliceosome,biological_process
1.22277	0.00127375	0.000827325	Q8IYI6	EXOC8	Exocyst complex component 8	EXOC8_HUMAN	5	exocyst,late endosome,cytosol,plasma membrane,membrane,growth cone,cell leading edge,perinuclear region of cytoplasm	protein binding,Ral GTPase binding	exocyst assembly,endosome organization,protein transport,regulation of macroautophagy,extracellular matrix disassembly,exocyst localization
1.22268	0.000474429	0.000339407	Q6PD74	AAGAB	Alpha- and gamma-adaptin-binding protein p34	AAGAB_HUMAN	1	cytoplasm,cytosol,nuclear speck	protein binding	protein transport
1.2219	1.6753e-14	4.71049e-14	O00231	PSMD11	26S proteasome non-ATPase regulatory subunit 11	PSD11_HUMAN	22	proteasome complex,extracellular region,nucleus,nucleoplasm,cytosol,proteasome regulatory particle, lid subcomplex,membrane,proteasome accessory complex,secretory granule lumen,extracellular exosome,ficolin-1-rich granule lumen	structural molecule activity,protein binding	MAPK cascade,protein polyubiquitination,stimulatory C-type lectin receptor signaling pathway,antigen processing and presentation of exogenous peptide antigen via MHC class I, TAP-dependent,ubiquitin-dependent protein catabolic process,regulation of cellular amino acid metabolic process,negative regulation of G2/M transition of mitotic cell cycle,protein deubiquitination,anaphase-promoting complex…
1.22176	0.0394356	0.0169908	P51957	NEK4	Serine/threonine-protein kinase Nek4	NEK4_HUMAN	4	cytoplasm,cytosol,ciliary rootlet,ciliary transition zone,ciliary basal body,ciliary plasm	protein serine/threonine kinase activity,ATP binding,manganese ion binding	mitotic cell cycle,protein phosphorylation,cellular response to DNA damage stimulus,regulation of mitotic cell cycle,signal transduction by protein phosphorylation,stress-activated protein kinase signaling cascade,activation of protein kinase activity,regulation of apoptotic process,positive regulation of transcription, DNA-templated,cell division,regulation of replicative cell aging,regulation o…
1.22138	0.0478174	0.0200791	P35221	CTNNA1	Catenin alpha-1	CTNA1_HUMAN	12	acrosomal vesicle,Golgi apparatus,cytosol,plasma membrane,cell-cell junction,zonula adherens,focal adhesion,intercalated disc,actin cytoskeleton,catenin complex,flotillin complex,lamellipodium,cell junction,intracellular membrane-bounded organelle	RNA binding,structural molecule activity,protein binding,beta-catenin binding,vinculin binding,identical protein binding,gamma-catenin binding,cadherin binding,protein heterodimerization activity,actin filament binding	ovarian follicle development,actin filament organization,cell adhesion,establishment or maintenance of cell polarity,negative regulation of neuroblast proliferation,aging,male gonad development,gap junction assembly,axon regeneration,adherens junction organization,cellular protein localization,odontogenesis of dentin-containing tooth,apical junction assembly,response to estrogen,positive regulati…
1.22116	3.8463e-05	3.3742e-05	Q99871	HAUS7	HAUS augmin-like complex subunit 7	HAUS7_HUMAN	5	centrosome,spindle,cytosol,microtubule,HAUS complex	protein binding,thioesterase binding	G2/M transition of mitotic cell cycle,centrosome cycle,regulation of G2/M transition of mitotic cell cycle,spindle assembly,cell division,ciliary basal body docking
1.21975	3.6587e-08	4.99185e-08	Q14738	PPP2R5D	Serine/threonine-protein phosphatase 2A 56 kDa regulatory subunit delta isoform	2A5D_HUMAN	9	protein phosphatase type 2A complex,nucleus,nucleoplasm,cytosol	phosphoprotein phosphatase activity,protein serine/threonine phosphatase activity,protein binding,protein phosphatase regulator activity	protein dephosphorylation,signal transduction,nervous system development,positive regulation of protein dephosphorylation,regulation of phosphoprotein phosphatase activity
1.21966	0.00548902	0.00303951	Q92797	SYMPK	Symplekin	SYMPK_HUMAN	5	nucleoplasm,cytoplasm,cytosol,cytoskeleton,plasma membrane,bicellular tight junction,nuclear stress granule	protein binding	mRNA splicing, via spliceosome,termination of RNA polymerase II transcription,mRNA polyadenylation,mRNA export from nucleus,cell adhesion,mRNA 3'-end processing,positive regulation of protein dephosphorylation
1.21864	5.91522e-10	1.00265e-09	O00232	PSMD12	26S proteasome non-ATPase regulatory subunit 12	PSD12_HUMAN	15	proteasome complex,extracellular region,nucleoplasm,cytoplasm,cytosol,proteasome regulatory particle,proteasome regulatory particle, lid subcomplex,membrane,proteasome accessory complex,nuclear proteasome complex,secretory granule lumen,extracellular exosome,ficolin-1-rich granule lumen		MAPK cascade,protein polyubiquitination,stimulatory C-type lectin receptor signaling pathway,antigen processing and presentation of exogenous peptide antigen via MHC class I, TAP-dependent,regulation of cellular amino acid metabolic process,negative regulation of G2/M transition of mitotic cell cycle,protein deubiquitination,anaphase-promoting complex-dependent catabolic process,SCF-dependent pro…
1.21775	2.34762e-06	2.48968e-06	Q96IZ7	RSRC1	Serine/Arginine-related protein 53	RSRC1_HUMAN	5	nucleus,cytoplasm,nuclear speck	protein binding	alternative mRNA splicing, via spliceosome,mRNA splicing, via spliceosome,protein phosphorylation,nucleocytoplasmic transport,RNA splicing,response to antibiotic
1.21632	0.00294728	0.00174806	Q8WUQ7	CACTIN	Cactin	CATIN_HUMAN	9	nucleus,nucleoplasm,cytosol,nuclear speck,extracellular exosome,catalytic step 2 spliceosome	RNA binding,protein binding	mRNA splicing, via spliceosome,negative regulation of protein phosphorylation,multicellular organism development,negative regulation of lipopolysaccharide-mediated signaling pathway,negative regulation of NF-kappaB transcription factor activity,negative regulation of interferon-beta production,negative regulation of interleukin-8 production,negative regulation of tumor necrosis factor production,…
1.21574	0.0422705	0.0180561	Q6ZRP7	QSOX2	Sulfhydryl oxidase 2	QSOX2_HUMAN	2	extracellular space,nucleoplasm,Golgi apparatus,plasma membrane,integral component of Golgi membrane,nuclear membrane	protein disulfide isomerase activity,flavin-linked sulfhydryl oxidase activity	cell redox homeostasis,oxidation-reduction process
1.21451	6.60519e-05	5.56791e-05	Q7Z6K5	ARPIN	Arpin	ARPIN_HUMAN	6	lamellipodium	protein binding	negative regulation of cell migration,directional locomotion,negative regulation of actin nucleation,negative regulation of lamellipodium morphogenesis
1.21402	9.857e-05	8.02188e-05	Q5VU43	PDE4DIP	Myomegalin	MYOME_HUMAN	8	nucleus,cytoplasm,Golgi apparatus,centrosome,myofibril	protein binding,enzyme binding,protein complex scaffold	cellular protein complex assembly,regulation of Golgi organization
1.21209	3.46067e-10	6.05105e-10	Q70E73	RAPH1	Ras-associated and pleckstrin homology domains-containing protein 1	RAPH1_HUMAN	13	cytosol,cytoskeleton,plasma membrane,nuclear body,lamellipodium,filopodium	protein binding	signal transduction,axon extension
1.21206	0.000909298	0.00061151	O75312	ZPR1	Zinc finger protein ZPR1	ZPR1_HUMAN	1	nucleus,nucleoplasm,nucleolus,cytoplasm,Cajal body,axon,growth cone,SMN complex,neuronal cell body,perikaryon,perinuclear region of cytoplasm,Gemini of coiled bodies	protein binding,zinc ion binding,receptor tyrosine kinase binding,translation initiation factor binding	microtubule cytoskeleton organization,inner cell mass cell proliferation,trophectodermal cell proliferation,mRNA processing,signal transduction,cell proliferation,RNA splicing,positive regulation of gene expression,spinal cord development,Cajal body organization,regulation of myelination,positive regulation of RNA splicing,DNA endoreduplication,positive regulation of protein import into nucleus,p…
1.2118	0.0236225	0.0109009	Q14847	LASP1	LIM and SH3 domain protein 1	LASP1_HUMAN	5	cytoplasm,focal adhesion,cortical actin cytoskeleton,extracellular exosome	SH3/SH2 adaptor activity,protein binding,ion transmembrane transporter activity,cadherin binding,metal ion binding,actin filament binding	ion transport,positive regulation of signal transduction,ion transmembrane transport
1.2113	6.98526e-17	2.36415e-16	O75665	OFD1	Oral-facial-digital syndrome 1 protein	OFD1_HUMAN	39	nucleus,centrosome,centriole,cytosol,cilium,membrane,centriolar satellite,ciliary basal body	protein binding,identical protein binding,alpha-tubulin binding,gamma-tubulin binding	G2/M transition of mitotic cell cycle,regulation of G2/M transition of mitotic cell cycle,cilium morphogenesis,epithelial cilium movement involved in determination of left/right asymmetry,ciliary basal body docking,mitotic cell cycle,centriole replication,mitotic spindle assembly
1.21051	8.35836e-11	1.56714e-10	Q8WVK7	SKA2	Spindle and kinetochore-associated protein 2	SKA2_HUMAN	7	condensed chromosome outer kinetochore,cytosol,spindle microtubule	protein binding,microtubule binding	mitotic cell cycle,chromosome segregation,sister chromatid cohesion,regulation of microtubule polymerization or depolymerization,cell division
1.20732	0.00897922	0.00470346	Q9UI08	EVL	Ena/VASP-like protein	EVL_HUMAN	2	cytoplasm,cytosol,cytoskeleton,focal adhesion,membrane,lamellipodium,phagocytic vesicle	actin binding,protein binding,profilin binding,SH3 domain binding	actin filament organization,cell surface receptor signaling pathway,nervous system development,axon guidance,actin polymerization or depolymerization,animal organ morphogenesis,negative regulation of epithelial cell migration,actin nucleation,protein homotetramerization,positive regulation of stress fiber assembly,cellular response to interferon-gamma,negative regulation of ruffle assembly
1.20627	3.66049e-10	6.3743e-10	Q96RK0	CIC	Protein capicua homolog	CIC_HUMAN	18	nucleus,nucleoplasm,intracellular membrane-bounded organelle,protein complex	DNA binding,chromatin binding,protein binding	negative regulation of transcription from RNA polymerase II promoter,transcription, DNA-templated,brain development,learning,memory,social behavior,negative regulation of transcription, DNA-templated,lung alveolus development
1.20515	0.23835	0.0792693	O96007	MOCS2	Molybdopterin synthase catalytic subunit	MOC2B_HUMAN	2	nucleus,cytosol,nuclear speck,molybdopterin synthase complex	molybdopterin synthase activity	Mo-molybdopterin cofactor biosynthetic process,molybdopterin cofactor biosynthetic process
1.20238	0.0251488	0.0115002	Q9UBH6	XPR1	Xenotropic and polytropic retrovirus receptor 1	XPR1_HUMAN	5	cytoplasm,integral component of membrane,intrinsic component of plasma membrane	inositol hexakisphosphate binding,virus receptor activity,receptor activity,transmembrane signaling receptor activity,G-protein coupled receptor activity,phosphate ion transmembrane transporter activity,efflux transmembrane transporter activity	G-protein coupled receptor signaling pathway,response to virus,cellular phosphate ion homeostasis,phosphate ion transmembrane transport,viral entry into host cell
1.20209	3.34385e-05	2.96185e-05	Q9H939	PSTPIP2	Proline-serine-threonine phosphatase-interacting protein 2	PPIP2_HUMAN	4	cytosol,cytoskeleton,membrane	actin binding	cytoskeleton organization,cell migration
1.2016	1.8701e-14	5.23138e-14	Q96R06	SPAG5	Sperm-associated antigen 5	SPAG5_HUMAN	36	kinetochore,condensed chromosome kinetochore,cytoplasm,spindle microtubule,midbody,centriolar satellite,microtubule plus-end,mitotic spindle,mitotic spindle pole	protein binding,microtubule binding	mitotic sister chromatid segregation,spindle organization,chromosome segregation,positive regulation of intracellular transport,establishment of spindle orientation,cell division,regulation of attachment of spindle microtubules to kinetochore,protein localization to centrosome,regulation of metaphase plate congression,Requires Ontology
1.20156	2.64756e-29	2.1258e-28	Q5VT52	RPRD2	Regulation of nuclear pre-mRNA domain-containing protein 2	RPRD2_HUMAN	30	nucleoplasm,DNA-directed RNA polymerase II, holoenzyme		snRNA transcription from RNA polymerase II promoter
1.20035	0.992264	0.254583	Q6UB98	ANKRD12	Ankyrin repeat domain-containing protein 12	ANR12_HUMAN	1	nucleoplasm,cytosol
1.19833	2.0032e-05	1.83011e-05	Q9H6Z4	RANBP3	Ran-binding protein 3	RANB3_HUMAN	15	nucleus,nucleoplasm,cytoplasm,centrosome	protein binding,Ran GTPase binding,R-SMAD binding,GTPase activator activity	G1/S transition of mitotic cell cycle,RNA export from nucleus,ubiquitin-dependent protein catabolic process,protein import into nucleus,spindle organization,positive regulation of GTPase activity,positive regulation of mitotic centrosome separation,intracellular transport
1.1982	0.0258287	0.0117656	O15498	YKT6	Synaptobrevin homolog YKT6	YKT6_HUMAN	8	Golgi membrane,cytoplasm,mitochondrion,endosome,endoplasmic reticulum,Golgi apparatus,cytosol,integral component of plasma membrane,transport vesicle,cytoplasmic vesicle membrane,SNARE complex,endoplasmic reticulum-Golgi intermediate compartment membrane,neuronal cell body,extracellular exosome,apical dendrite,basilar dendrite	SNARE binding,SNAP receptor activity,protein-cysteine S-palmitoyltransferase activity,cadherin binding	ER to Golgi vesicle-mediated transport,vesicle targeting,vesicle docking involved in exocytosis,vesicle fusion,protein transport,retrograde transport, endosome to Golgi
1.19774	0.00429165	0.00244346	P48556	PSMD8	26S proteasome non-ATPase regulatory subunit 8	PSMD8_HUMAN	6	proteasome complex,nucleus,nucleoplasm,cytosol,proteasome regulatory particle,proteasome regulatory particle, lid subcomplex,proteasome accessory complex,extracellular exosome		MAPK cascade,protein polyubiquitination,stimulatory C-type lectin receptor signaling pathway,antigen processing and presentation of exogenous peptide antigen via MHC class I, TAP-dependent,regulation of cellular amino acid metabolic process,negative regulation of G2/M transition of mitotic cell cycle,protein deubiquitination,anaphase-promoting complex-dependent catabolic process,SCF-dependent pro…
1.19563	5.22472e-06	5.24934e-06	Q8WYA0	IFT81	Intraflagellar transport protein 81 homolog	IFT81_HUMAN	16	centrosome,cilium,intraciliary transport particle B,motile cilium,ciliary basal body,sperm midpiece,sperm principal piece,ciliary tip	protein binding,tubulin binding	spermatogenesis,intraciliary transport involved in cilium morphogenesis,cilium morphogenesis
1.19504	2.79165e-07	3.39384e-07	Q6VMQ6	ATF7IP	Activating transcription factor 7-interacting protein 1	MCAF1_HUMAN	6	nucleus,nucleoplasm,transcription factor complex,cytosol,nuclear body	transcription corepressor activity,protein binding,ATPase activity	negative regulation of transcription from RNA polymerase II promoter,DNA methylation,transcription, DNA-templated,viral process,negative regulation of transcription, DNA-templated,positive regulation of transcription, DNA-templated,regulation of RNA polymerase II transcriptional preinitiation complex assembly
1.19383	2.13153e-11	4.27867e-11	O60885	BRD4	Bromodomain-containing protein 4	BRD4_HUMAN	27	condensed nuclear chromosome,nucleus,nucleoplasm,cytosol	RNA polymerase II core binding,p53 binding,chromatin binding,protein binding,lysine-acetylated histone binding	regulation of transcription involved in G1/S transition of mitotic cell cycle,transcription, DNA-templated,cellular response to DNA damage stimulus,positive regulation of G2/M transition of mitotic cell cycle,viral process,chromatin modification,positive regulation of transcription elongation from RNA polymerase II promoter,positive regulation of I-kappaB kinase/NF-kappaB signaling,positive regul…
1.19297	0.267493	0.0872845	Q9UKG1	APPL1	DCC-interacting protein 13-alpha	DP13A_HUMAN	4	nucleus,early endosome,cytosol,endosome membrane,vesicle membrane,early endosome membrane,extracellular exosome,NuRD complex	protein binding,identical protein binding,protein kinase B binding	cell cycle,signal transduction,cell proliferation,insulin receptor signaling pathway,regulation of glucose import,extrinsic apoptotic signaling pathway in absence of ligand,regulation of protein localization to plasma membrane
1.19205	4.20235e-05	3.66143e-05	Q92831	KAT2B	Histone acetyltransferase KAT2B	KAT2B_HUMAN	2	PCAF complex,kinetochore,nucleus,nucleoplasm,Ada2/Gcn5/Ada3 transcription activator complex,A band,I band,actomyosin,protein complex	RNA polymerase II regulatory region sequence-specific DNA binding,chromatin binding,transcription cofactor activity,transcription coactivator activity,histone acetyltransferase activity,lysine N-acetyltransferase activity, acting on acetyl phosphate as donor,cyclin-dependent protein serine/threonine kinase inhibitor activity,protein binding,transcription factor binding,acetyltransferase activity,…	chromatin remodeling,transcription initiation from RNA polymerase II promoter,protein acetylation,cell cycle arrest,Notch signaling pathway,negative regulation of cell proliferation,regulation of protein ADP-ribosylation,viral process,protein deubiquitination,N-terminal peptidyl-lysine acetylation,internal peptidyl-lysine acetylation,peptidyl-lysine acetylation,cellular response to insulin stimul…
1.19045	1.71225e-51	3.84304e-50	Q14008	CKAP5	Cytoskeleton-associated protein 5	CKAP5_HUMAN	72	kinetochore,condensed chromosome kinetochore,spindle pole,nucleolus,centrosome,cytosol,plasma membrane,membrane,protein complex,gamma-tubulin complex,microtubule cytoskeleton,microtubule plus-end	protein binding,cadherin binding,microtubule plus-end binding	G2/M transition of mitotic cell cycle,microtubule depolymerization,spindle organization,sister chromatid cohesion,centrosome cycle,regulation of G2/M transition of mitotic cell cycle,establishment or maintenance of microtubule cytoskeleton polarity,microtubule polymerization,RNA transport,centrosome duplication,cell division,ciliary basal body docking
1.18776	0.216204	0.0729461	Q9UKB1	FBXW11	F-box/WD repeat-containing protein 11	FBW1B_HUMAN	1	ubiquitin ligase complex,nucleus,centrosome,cytosol,SCF ubiquitin ligase complex	ubiquitin-protein transferase activity,protein binding,protein dimerization activity,ubiquitin protein ligase activity	G2/M transition of mitotic cell cycle,protein polyubiquitination,stimulatory C-type lectin receptor signaling pathway,protein dephosphorylation,Wnt signaling pathway,protein ubiquitination,SCF-dependent proteasomal ubiquitin-dependent protein catabolic process,protein destabilization,NIK/NF-kappaB signaling,Fc-epsilon receptor signaling pathway,negative regulation of NF-kappaB import into nucleus…
1.1871	0.00437015	0.00248373	Q92551	IP6K1	Inositol hexakisphosphate kinase 1	IP6K1_HUMAN	3	fibrillar center,nucleus,nucleoplasm,cytosol	inositol-1,3,4,5,6-pentakisphosphate kinase activity,inositol hexakisphosphate kinase activity,inositol heptakisphosphate kinase activity,inositol hexakisphosphate 5-kinase activity,protein binding,ATP binding,inositol hexakisphosphate 1-kinase activity,inositol hexakisphosphate 3-kinase activity,inositol 5-diphosphate pentakisphosphate 5-kinase activity,inositol diphosphate tetrakisphosphate kin…	inositol phosphate biosynthetic process,inositol phosphate metabolic process,phosphatidylinositol phosphorylation
1.18598	0.0270385	0.0122317	Q9Y6V0	PCLO	Protein piccolo	PCLO_HUMAN	7	cytoskeleton,postsynaptic density,membrane,cell junction,synapse,cytoskeleton of presynaptic active zone,extracellular exosome	calcium ion binding,profilin binding,calcium-dependent phospholipid binding	cytoskeleton organization,synapse assembly,synaptic vesicle exocytosis,regulation of exocytosis,cAMP-mediated signaling,insulin secretion,protein localization to synapse,presynapse to nucleus signaling pathway
1.18415	0.782566	0.212111	Q9BPX5	ARPC5L	Actin-related protein 2/3 complex subunit 5-like protein	ARP5L_HUMAN	1	cytoplasm,Arp2/3 protein complex,focal adhesion,extracellular exosome	molecular_function,protein binding,actin filament binding	biological_process,cell migration,Arp2/3 complex-mediated actin nucleation
1.18405	1.06335e-10	1.96587e-10	P46109	CRKL	Crk-like protein	CRKL_HUMAN	16	nucleoplasm,endosome,cytosol,extracellular exosome	phosphotyrosine binding,RNA binding,signal transducer activity,SH3/SH2 adaptor activity,protein binding,identical protein binding,cadherin binding	activation of MAPKK activity,blood vessel development,JNK cascade,Ras protein signal transduction,heart development,positive regulation of cell proliferation,animal organ morphogenesis,anterior/posterior pattern specification,intracellular signal transduction,thymus development,parathyroid gland development,positive regulation of substrate adhesion-dependent cell spreading
1.18373	1.38717e-21	6.68839e-21	Q9Y4E1	FAM21C	WASH complex subunit FAM21C	FA21C_HUMAN	36	nucleolus,endosome,early endosome,cytosol,plasma membrane,early endosome membrane,intracellular membrane-bounded organelle,WASH complex,retromer complex	protein binding,phosphatidylinositol-4,5-bisphosphate binding,phosphatidylinositol-3,4,5-trisphosphate binding,phosphatidylinositol-5-phosphate binding,phosphatidylinositol-3-phosphate binding,phosphatidylinositol-3,4-bisphosphate binding,phosphatidylinositol-4-phosphate binding,phosphatidylinositol-3,5-bisphosphate binding,retromer complex binding	protein transport,retrograde transport, endosome to Golgi,regulation of substrate adhesion-dependent cell spreading,retrograde transport, endosome to plasma membrane,negative regulation of barbed-end actin filament capping
1.18176	0.0301492	0.0134144	Q9H270	VPS11	Vacuolar protein sorting-associated protein 11 homolog	VPS11_HUMAN	1	lysosome,lysosomal membrane,endosome,late endosome,autophagosome,clathrin-coated vesicle,endocytic vesicle,HOPS complex,late endosome membrane,early endosome	nucleotide binding,protein binding,protein domain specific binding,syntaxin binding,protein binding, bridging,metal ion binding	intracellular protein transport,vesicle docking involved in exocytosis,autophagy,endosome organization,lysosome organization,endosome to lysosome transport,regulation of protein stability,endosomal vesicle fusion,regulation of SNARE complex assembly,regulation of organelle assembly,positive regulation of cellular protein catabolic process,positive regulation of protein targeting to mitochondrion,…
1.1814	0.1291	0.0470415	Q9Y3A3	MOB4	MOB-like protein phocein	PHOCN_HUMAN	2	cytoplasm,Golgi apparatus,cytosol,Golgi cisterna membrane,neuronal cell body,dendritic spine,perinuclear region of cytoplasm	protein binding,kinase binding,metal ion binding
1.18048	0.228167	0.0763607	Q9UHY7	ENOPH1	Enolase-phosphatase E1	ENOPH_HUMAN	1	nucleus,cytosol,extracellular exosome	magnesium ion binding,acireductone synthase activity	dephosphorylation,L-methionine biosynthetic process from methylthioadenosine
1.17935	0.0381682	0.0165133	Q9UEE9	CFDP1	Craniofacial development protein 1	CFDP1_HUMAN	6	condensed chromosome kinetochore,cellular_component	molecular_function	cell adhesion,multicellular organism development,biological_process,regulation of cell shape,regulation of cell proliferation,negative regulation of fibroblast apoptotic process
1.17898	9.76947e-13	2.27244e-12	Q9UPS8	ANKRD26	Ankyrin repeat domain-containing protein 26	ANR26_HUMAN	35	centrosome	protein binding	negative regulation of fat cell differentiation
1.17845	0.000181276	0.00014078	Q86Y56	DNAAF5	Dynein assembly factor 5, axonemal	DAAF5_HUMAN	5	cytoplasm,motile cilium	dynein intermediate chain binding	cilium movement,outer dynein arm assembly,inner dynein arm assembly
1.1782	1.32016e-15	4.06971e-15	Q9UK61	FAM208A	Protein TASOR	TASOR_HUMAN	34	nucleoplasm,chromosome	RNA binding,protein binding	transcription, DNA-templated,regulation of transcription, DNA-templated
1.17814	0.00083212	0.000563557	P40818	USP8	Ubiquitin carboxyl-terminal hydrolase 8	UBP8_HUMAN	10	nucleus,cytoplasm,early endosome,cytosol,postsynaptic density,extrinsic component of plasma membrane,midbody,extrinsic component of endosome membrane,dendritic spine	cysteine-type endopeptidase activity,thiol-dependent ubiquitin-specific protease activity,protein binding,SH3 domain binding,cadherin binding	mitotic cytokinesis,ubiquitin-dependent protein catabolic process,endosome organization,cell proliferation,protein deubiquitination,protein K63-linked deubiquitination,protein K48-linked deubiquitination,cellular response to dexamethasone stimulus,positive regulation of canonical Wnt signaling pathway,cellular response to nerve growth factor stimulus
1.17731	1.00758e-10	1.86996e-10	Q86U44	METTL3	N6-adenosine-methyltransferase 70 kDa subunit	MTA70_HUMAN	9	nucleus,nucleoplasm,nuclear speck,MIS complex	mRNA binding,protein binding,RNA methyltransferase activity,mRNA (2'-O-methyladenosine-N6-)-methyltransferase activity,protein heterodimerization activity,S-adenosyl-L-methionine binding	mRNA splicing, via spliceosome,RNA methylation,adenosine to inosine editing,mRNA processing,mRNA catabolic process,cellular response to DNA damage stimulus,spermatogenesis,circadian rhythm,RNA metabolic process,stem cell population maintenance,forebrain radial glial cell differentiation,primary miRNA processing,cellular response to UV,gliogenesis,regulation of T cell differentiation,negative regu…
1.17537	0.032686	0.0143863	Q01850	CDR2	Cerebellar degeneration-related protein 2	CDR2_HUMAN	3	cytoplasm	molecular_function,protein binding
1.17369	5.91836e-42	8.50737e-41	P06709	birA	Bifunctional ligase/repressor BirA	BIRA_ECOLI	37
1.17271	0.000246982	0.00018704	P98174	FGD1	FYVE, RhoGEF and PH domain-containing protein 1	FGD1_HUMAN	6	ruffle,cytoplasm,Golgi apparatus,cytosol,cytoskeleton,lamellipodium	guanyl-nucleotide exchange factor activity,Rho guanyl-nucleotide exchange factor activity,small GTPase binding,metal ion binding	cytoskeleton organization,signal transduction,G-protein coupled receptor signaling pathway,multicellular organism development,regulation of cell shape,animal organ morphogenesis,actin cytoskeleton organization,regulation of Rho protein signal transduction,positive regulation of apoptotic process,regulation of GTPase activity,filopodium assembly,regulation of small GTPase mediated signal transduct…
1.17169	0.217807	0.0733735	Q3T8J9	GON4L	GON-4-like protein	GON4L_HUMAN	2	nucleus,nucleoplasm,nuclear body	DNA binding,transcription corepressor activity	transcription, DNA-templated,B cell differentiation,negative regulation of transcription, DNA-templated
1.17012	2.27849e-05	2.06588e-05	Q9BUP0	EFHD1	EF-hand domain-containing protein D1	EFHD1_HUMAN	5	mitochondrial inner membrane,extracellular exosome	calcium ion binding	neuron projection development
1.17011	0.000299583	0.000223045	P49368	CCT3	T-complex protein 1 subunit gamma	TCPG_HUMAN	25	zona pellucida receptor complex,cytosol,chaperonin-containing T-complex,cytoskeleton,microtubule,plasma membrane,myelin sheath,cell body,extracellular exosome	RNA binding,protein binding,ATP binding,protein binding involved in protein folding,unfolded protein binding	protein folding,'de novo' protein folding,binding of sperm to zona pellucida,positive regulation of telomere maintenance via telomerase,pore complex assembly,protein stabilization,chaperone-mediated protein folding,toxin transport,positive regulation of protein localization to Cajal body,positive regulation of telomerase RNA localization to Cajal body
1.16935	0.000129131	0.000102951	Q9UBT7	CTNNAL1	Alpha-catulin	CTNL1_HUMAN	4	cytosol,cytoskeleton,plasma membrane	protein binding,cadherin binding,actin filament binding	cell adhesion,Rho protein signal transduction
1.16734	0.00987678	0.00510602	Q9P260	KIAA1468	LisH domain and HEAT repeat-containing protein KIAA1468	K1468_HUMAN	8
1.1673	0.000189309	0.000146426	O95405	ZFYVE9	Zinc finger FYVE domain-containing protein 9	ZFYV9_HUMAN	6	early endosome,cytosol,early endosome membrane,intracellular membrane-bounded organelle,protein complex	protein binding,1-phosphatidylinositol binding,serine-type peptidase activity,protein domain specific binding,metal ion binding	proteolysis,endocytosis,transforming growth factor beta receptor signaling pathway,SMAD protein complex assembly,SMAD protein import into nucleus
1.16563	0.0873999	0.0337737	Q92569	PIK3R3	Phosphatidylinositol 3-kinase regulatory subunit gamma	P55G_HUMAN	3	cytosol,phosphatidylinositol 3-kinase complex	phosphotyrosine binding,protein binding,1-phosphatidylinositol-3-kinase activity,1-phosphatidylinositol-3-kinase regulator activity	phosphatidylinositol biosynthetic process,insulin receptor signaling pathway,phosphatidylinositol-3-phosphate biosynthetic process,regulation of phosphatidylinositol 3-kinase activity,positive regulation of glucose import in response to insulin stimulus
1.1646	0.0218078	0.0101587	Q12948	FOXC1	Forkhead box protein C1	FOXC1_HUMAN	1	nucleus,nucleoplasm,nuclear heterochromatin,cytosol	RNA polymerase II regulatory region sequence-specific DNA binding,RNA polymerase II transcription factor activity, sequence-specific DNA binding,transcription coactivator binding,transcriptional activator activity, RNA polymerase II transcription regulatory region sequence-specific binding,DNA binding,transcription factor activity, sequence-specific DNA binding,transcription factor activity, RNA …	negative regulation of transcription from RNA polymerase II promoter,angiogenesis,ovarian follicle development,eye development,ureteric bud development,in utero embryonic development,somitogenesis,kidney development,lymph vessel development,endochondral ossification,blood vessel remodeling,regulation of transcription, DNA-templated,transcription from RNA polymerase II promoter,Notch signaling pat…
1.16331	0.0197478	0.0093248	Q6ZU65	UBN2	Ubinuclein-2	UBN2_HUMAN	8	extracellular space,nucleoplasm
1.16298	1.91886e-09	3.04448e-09	Q96BD8	SKA1	Spindle and kinetochore-associated protein 1	SKA1_HUMAN	5	condensed chromosome outer kinetochore,cytosol,spindle microtubule,microtubule cytoskeleton	protein binding,microtubule binding	mitotic cell cycle,chromosome segregation,sister chromatid cohesion,regulation of microtubule polymerization or depolymerization,cell division
1.16284	3.01293e-09	4.68732e-09	O95359	TACC2	Transforming acidic coiled-coil-containing protein 2	TACC2_HUMAN	15	nucleoplasm,cytoplasm,microtubule organizing center,cytosol,plasma membrane,microtubule cytoskeleton	nuclear hormone receptor binding	microtubule cytoskeleton organization,cell proliferation,cerebral cortex development
1.15957	2.74928e-05	2.46018e-05	O43719	HTATSF1	HIV Tat-specific factor 1	HTSF1_HUMAN	7	nucleus,nucleoplasm,U2-type spliceosomal complex,U2 snRNP	RNA binding	mRNA splicing, via spliceosome,transcription, DNA-templated,regulation of transcription from RNA polymerase II promoter,viral genome replication,regulation of DNA-templated transcription, elongation
1.15938	0.0408621	0.0175286	O15068	MCF2L	Guanine nucleotide exchange factor DBS	MCF2L_HUMAN	1	extracellular space,cytosol,plasma membrane,endomembrane system	guanyl-nucleotide exchange factor activity,Rho guanyl-nucleotide exchange factor activity,phosphatidylinositol binding	G-protein coupled receptor signaling pathway,regulation of Rho protein signal transduction,intracellular signal transduction,positive regulation of apoptotic process,regulation of small GTPase mediated signal transduction,regulation of molecular function
1.15929	1.17911e-05	1.11656e-05	Q9H9C1	VIPAS39	Spermatogenesis-defective protein 39 homolog	SPE39_HUMAN	9	cytoplasm,early endosome,late endosome,Golgi apparatus,recycling endosome,HOPS complex	protein binding	transcription, DNA-templated,regulation of transcription, DNA-templated,intracellular protein transport,spermatogenesis,endosome to lysosome transport,peptidyl-lysine hydroxylation,cell differentiation,collagen fibril organization,collagen metabolic process,post-translational protein modification,autophagosome maturation
1.1586	0.000793439	0.000539942	Q6BDS2	UHRF1BP1	UHRF1-binding protein 1	URFB1_HUMAN	8		protein binding,identical protein binding,histone deacetylase binding
1.15785	4.97454e-15	1.4552e-14	Q99550	MPHOSPH9	M-phase phosphoprotein 9	MPP9_HUMAN	28	Golgi membrane,Golgi apparatus,centriole,membrane
1.15739	1.88137e-09	2.99117e-09	Q9HCK1	ZDBF2	DBF4-type zinc finger-containing protein 2	ZDBF2_HUMAN	25		nucleic acid binding,zinc ion binding
1.15698	0.00448006	0.00253606	Q8WUU5	GATAD1	GATA zinc finger domain-containing protein 1	GATD1_HUMAN	3	nucleus,nucleoplasm	transcription factor activity, sequence-specific DNA binding,zinc ion binding,sequence-specific DNA binding	regulation of transcription, DNA-templated,chromatin assembly
1.15606	0.00133014	0.000861037	Q5TZA2	CROCC	Rootletin	CROCC_HUMAN	30	photoreceptor inner segment,centrosome,centriole,cytosol,plasma membrane,actin cytoskeleton,ciliary rootlet,extracellular exosome	actin binding,structural molecule activity,protein binding,kinesin binding	centrosome cycle,protein localization,centriole-centriole cohesion,epithelial structure maintenance,ciliary basal body organization,protein localization to organelle,photoreceptor cell maintenance,positive regulation of cilium assembly,establishment of organelle localization,positive regulation of protein localization to cilium
1.15466	0.0344217	0.0150536	Q96DT6	ATG4C	Cysteine protease ATG4C	ATG4C_HUMAN	3	extracellular region,cytoplasm,cytosol	cysteine-type endopeptidase activity,peptidase activity	autophagosome assembly,mitophagy,C-terminal protein lipidation,proteolysis,protein targeting to membrane,autophagy,nucleophagy,protein delipidation
1.15388	9.3403e-06	9.00932e-06	Q9ULV4	CORO1C	Coronin-1C	COR1C_HUMAN	11	cytoplasm,focal adhesion,actin cytoskeleton,lateral plasma membrane,flotillin complex,lamellipodium,vesicle	protein binding,Rac GTPase binding,actin filament binding	neural crest cell migration,regulation of protein phosphorylation,negative regulation of protein phosphorylation,phagocytosis,signal transduction,regulation of epithelial cell migration,negative regulation of epithelial cell migration,regulation of fibroblast migration,actin cytoskeleton organization,negative regulation of protein kinase activity by regulation of protein phosphorylation,establish…
1.15353	1.99614e-09	3.16316e-09	Q2KHM9	KIAA0753	Protein moonraker	MOONR_HUMAN	13	centrosome,centriole,cytosol,centriolar satellite	protein binding	centriole replication,protein localization to centrosome
1.15252	2.88576e-07	3.49497e-07	Q96F24	NRBF2	Nuclear receptor-binding factor 2	NRBF2_HUMAN	8	nucleoplasm,cytoplasm,autophagosome,cytoplasmic vesicle,phosphatidylinositol 3-kinase complex, class III	protein binding	regulation of transcription, DNA-templated,transcription initiation from RNA polymerase II promoter,autophagy,response to endoplasmic reticulum stress,regulation of lipid kinase activity
1.15127	0.180315	0.0625778	Q9UI95	MAD2L2	Mitotic spindle assembly checkpoint protein MAD2B	MD2L2_HUMAN	1	nucleus,nucleoplasm,nucleolus,spindle,cytosol,zeta DNA polymerase complex,anaphase-promoting complex	RNA polymerase II activating transcription factor binding,protein binding,JUN kinase binding	negative regulation of transcription from RNA polymerase II promoter,regulation of cell growth,double-strand break repair,transcription, DNA-templated,actin filament organization,mitotic spindle assembly checkpoint,negative regulation of epithelial to mesenchymal transition,negative regulation of transcription by competitive promoter binding,positive regulation of peptidyl-serine phosphorylation,…
1.14835	0.557335	0.160916	O95372	LYPLA2	Acyl-protein thioesterase 2	LYPA2_HUMAN	3	cytoplasm,Golgi stack,cytosol,extracellular exosome	palmitoyl-(protein) hydrolase activity,cadherin binding,carboxylic ester hydrolase activity	protein depalmitoylation,fatty acid metabolic process,axon guidance
1.14814	8.76759e-09	1.29224e-08	Q9UKF6	CPSF3	Cleavage and polyadenylation specificity factor subunit 3	CPSF3_HUMAN	18	nucleoplasm,mRNA cleavage and polyadenylation specificity factor complex,intracellular ribonucleoprotein complex	RNA binding,endoribonuclease activity,protein binding,5'-3' exonuclease activity,metal ion binding	mRNA splicing, via spliceosome,termination of RNA polymerase II transcription,mRNA polyadenylation,mRNA cleavage,mRNA 3'-end processing by stem-loop binding and cleavage,mRNA export from nucleus,mRNA 3'-end processing,RNA phosphodiester bond hydrolysis, endonucleolytic
1.14803	1.51323e-11	3.08268e-11	Q9NQW6	ANLN	Actin-binding protein anillin	ANLN_HUMAN	12	nucleoplasm,actomyosin contractile ring,actin cytoskeleton,midbody,bleb,cell cortex region	actin binding,cadherin binding	mitotic cytokinesis,septin ring assembly,hematopoietic progenitor cell differentiation,regulation of exit from mitosis,glomerular visceral epithelial cell migration,positive regulation of bleb assembly
1.14748	0.00682242	0.00368432	P83436	COG7	Conserved oligomeric Golgi complex subunit 7	COG7_HUMAN	2	Golgi membrane,nucleolus,Golgi apparatus,Golgi transport complex,trans-Golgi network membrane	protein binding	protein glycosylation,intracellular protein transport,ER to Golgi vesicle-mediated transport,retrograde vesicle-mediated transport, Golgi to ER,Golgi organization,protein localization to organelle,protein localization to Golgi apparatus,protein stabilization
1.14717	0.000362466	0.00026493	O43524	FOXO3	Forkhead box protein O3	FOXO3_HUMAN	3	nucleus,nucleoplasm,cytoplasm,mitochondrion,cytosol,membrane	core promoter binding,transcription cofactor binding,transcriptional repressor activity, RNA polymerase II transcription regulatory region sequence-specific binding,transcriptional activator activity, RNA polymerase II transcription regulatory region sequence-specific binding,DNA binding,transcription factor activity, sequence-specific DNA binding,protein binding,beta-catenin binding,protein kina…	negative regulation of transcription from RNA polymerase II promoter,ovulation from ovarian follicle,initiation of primordial ovarian follicle growth,antral ovarian follicle growth,oocyte maturation,regulation of transcription from RNA polymerase II promoter,transcription from RNA polymerase II promoter,regulation of translation,aging,anatomical structure morphogenesis,DNA damage response, signal…
1.14608	3.63601e-19	1.48142e-18	Q5T8P6	RBM26	RNA-binding protein 26	RBM26_HUMAN	15		RNA binding,protein binding,metal ion binding	mRNA processing,negative regulation of phosphatase activity
1.14464	4.45127e-40	5.83071e-39	O15078	CEP290	Centrosomal protein of 290 kDa	CE290_HUMAN	72	extracellular region,nucleus,cytoplasm,centrosome,centriole,cytosol,membrane,photoreceptor connecting cilium,centriolar satellite,specific granule lumen,ciliary transition zone,MKS complex,ciliary basal body,protein complex,gamma-tubulin complex	protein binding,identical protein binding,microtubule minus-end binding	G2/M transition of mitotic cell cycle,regulation of G2/M transition of mitotic cell cycle,protein transport,hindbrain development,otic vesicle formation,eye photoreceptor cell development,neutrophil degranulation,positive regulation of transcription, DNA-templated,pronephros development,cilium morphogenesis,regulation of establishment of protein localization,positive regulation of intracellular p…
1.14438	0.00186397	0.00116438	Q96GX5	MASTL	Serine/threonine-protein kinase greatwall	GWL_HUMAN	12	nucleus,nucleoplasm,cytoplasm,centrosome,cleavage furrow	protein serine/threonine kinase activity,ATP binding,kinase activity,protein phosphatase 2A binding	G2/M transition of mitotic cell cycle,mitotic cell cycle,cellular response to DNA damage stimulus,female meiosis II,peptidyl-serine phosphorylation,negative regulation of phosphoprotein phosphatase activity,intracellular signal transduction,cell division,positive regulation of ubiquitin-protein ligase activity involved in meiotic cell cycle,regulation of cell cycle
1.14398	0.000368631	0.000268719	Q9UGP4	LIMD1	LIM domain-containing protein 1	LIMD1_HUMAN	12	cytoplasmic mRNA processing body,nucleus,transcription factor complex,cytoplasm,cytosol,plasma membrane,cell-cell junction,adherens junction,focal adhesion,RISC complex	transcription corepressor activity,protein binding,zinc ion binding	response to hypoxia,osteoblast development,transcription, DNA-templated,regulation of transcription, DNA-templated,cytoskeleton organization,signal transduction,multicellular organism development,regulation of cell shape,phosphorylation,cell migration,cytoplasmic mRNA processing body assembly,gene silencing by miRNA,negative regulation of hippo signaling,negative regulation of osteoblast differen…
1.14394	0.000375586	0.000273425	Q9P265	DIP2B	Disco-interacting protein 2 homolog B	DIP2B_HUMAN	10	nucleus,cytoplasm,membrane,extracellular exosome	molecular_function,catalytic activity	biological_process,metabolic process
1.14269	7.46956e-05	6.22544e-05	Q92609	TBC1D5	TBC1 domain family member 5	TBCD5_HUMAN	7	autophagosome,Golgi apparatus,cytosol,endosome membrane,retromer complex,intracellular membrane-bounded organelle,AP-2 adaptor complex,ATG1/ULK1 kinase complex	GTPase activator activity,protein binding,Rab GTPase binding,AP-2 adaptor complex binding,retromer complex binding	positive regulation of receptor internalization,intracellular protein transport,autophagy,macroautophagy,regulation of vesicle fusion,retrograde transport, endosome to Golgi,response to starvation,activation of GTPase activity,regulation of cilium assembly
1.14244	0.0065822	0.00356865	Q9NX08	COMMD8	COMM domain-containing protein 8	COMD8_HUMAN	6	nucleoplasm,cytosol	protein binding	transcription, DNA-templated,regulation of transcription, DNA-templated
1.14167	4.34589e-07	5.1227e-07	Q15811	ITSN1	Intersectin-1	ITSN1_HUMAN	13	cytosol,plasma membrane,clathrin-coated pit,lamellipodium,cell junction,endocytic vesicle,neuron projection,synapse	guanyl-nucleotide exchange factor activity,Rho guanyl-nucleotide exchange factor activity,calcium ion binding,protein binding,kinase activator activity,protein complex scaffold,proline-rich region binding	G-protein coupled receptor signaling pathway,small GTPase mediated signal transduction,viral process,regulation of Rho protein signal transduction,positive regulation of phosphorylation,positive regulation of apoptotic process,negative regulation of neuron apoptotic process,ephrin receptor signaling pathway,synaptic vesicle endocytosis,regulation of small GTPase mediated signal transduction,posit…
1.14104	0.129091	0.0470415	Q9BRG1	VPS25	Vacuolar protein-sorting-associated protein 25	VPS25_HUMAN	1	ESCRT II complex,nucleus,nucleoplasm,cytoplasm,cytosol,endosome membrane,extracellular exosome	structural molecule activity,protein binding,protein homodimerization activity,protein N-terminus binding	transcription, DNA-templated,regulation of transcription, DNA-templated,negative regulation of epidermal growth factor-activated receptor activity,endosomal transport,macroautophagy,multivesicular body assembly,protein targeting to vacuole involved in ubiquitin-dependent protein catabolic process via the multivesicular body sorting pathway
1.14097	4.90279e-07	5.71942e-07	O00161	SNAP23	Synaptosomal-associated protein 23	SNP23_HUMAN	5	nucleoplasm,cytoplasm,plasma membrane,cell-cell adherens junction,focal adhesion,phagocytic vesicle membrane,SNARE complex,specific granule membrane,specific granule,azurophil granule,mast cell granule,neuron projection,extracellular exosome,tertiary granule membrane,presynapse	SNAP receptor activity,protein binding,syntaxin binding	antigen processing and presentation of exogenous peptide antigen via MHC class I, TAP-dependent,histamine secretion by mast cell,post-Golgi vesicle-mediated transport,vesicle targeting,protein transport,synaptic vesicle priming,synaptic vesicle fusion to presynaptic active zone membrane,neutrophil degranulation,membrane fusion
1.14037	2.15901e-07	2.66354e-07	Q63ZY3	KANK2	KN motif and ankyrin repeat domain-containing protein 2	KANK2_HUMAN	15	cytoplasm,mitochondrion	protein binding	negative regulation of transcription from RNA polymerase II promoter,transcription, DNA-templated,apoptotic process,negative regulation of cell proliferation,negative regulation of intracellular estrogen receptor signaling pathway,negative regulation of programmed cell death,negative regulation of vitamin D receptor signaling pathway,negative regulation of G1/S transition of mitotic cell cycle
1.13975	0.000818611	0.000555191	Q5TKA1	LIN9	Protein lin-9 homolog	LIN9_HUMAN	4	nucleoplasm,transcriptional repressor complex	protein binding	transcription, DNA-templated,cell cycle,regulation of cell cycle,DNA biosynthetic process
1.1397	0.00317082	0.00186708	Q9UJX2	CDC23	Cell division cycle protein 23 homolog	CDC23_HUMAN	17	intracellular,nucleoplasm,anaphase-promoting complex,cytosol	ubiquitin-protein transferase activity,protein binding	mitotic cell cycle,ubiquitin-dependent protein catabolic process,mitotic metaphase plate congression,metaphase/anaphase transition of mitotic cell cycle,regulation of exit from mitosis,regulation of mitotic metaphase/anaphase transition,anaphase-promoting complex-dependent catabolic process,protein ubiquitination involved in ubiquitin-dependent protein catabolic process,proteasome-mediated ubiqui…
1.13859	2.06562e-16	6.78754e-16	Q7L014	DDX46	Probable ATP-dependent RNA helicase DDX46	DDX46_HUMAN	47	fibrillar center,nucleus,nucleoplasm,nucleolus,cytoplasm,Cajal body,membrane,nuclear speck	RNA binding,ATP-dependent RNA helicase activity,ATP binding	mRNA splicing, via spliceosome,regulation of gene expression,RNA secondary structure unwinding
1.13456	1.34036e-12	3.06756e-12	Q9C026	TRIM9	E3 ubiquitin-protein ligase TRIM9	TRIM9_HUMAN	12	cytoplasm,cytosol,cytoskeleton,synaptic vesicle,cell junction,dendrite	SNARE binding,ubiquitin-protein transferase activity,protein binding,zinc ion binding,protein domain specific binding,protein homodimerization activity	synaptic vesicle exocytosis,protein ubiquitination,negative regulation of SNARE complex assembly,proteasome-mediated ubiquitin-dependent protein catabolic process,negative regulation of calcium ion-dependent exocytosis
1.13428	9.56976e-05	7.79804e-05	Q13442	PDAP1	28 kDa heat- and acid-stable phosphoprotein	HAP28_HUMAN	6	extracellular region,cytosol,plasma membrane,ficolin-1-rich granule lumen	RNA binding	signal transduction,cell proliferation,neutrophil degranulation
1.1338	0.151181	0.053785	Q76N32	CEP68	Centrosomal protein of 68 kDa	CEP68_HUMAN	7	nucleus,centrosome,microtubule organizing center,cytosol,cell junction	protein binding,protein kinase binding,protein domain specific binding	centrosome cycle,centriole-centriole cohesion,protein localization to organelle
1.13311	0.0908519	0.0349353	O75251	NDUFS7	NADH dehydrogenase [ubiquinone] iron-sulfur protein 7, mitochondrial	NDUS7_HUMAN	1	mitochondrial respiratory chain complex I,mitochondrial matrix,neuron projection,neuronal cell body,synaptic membrane	protease binding,protein binding,NADH dehydrogenase (ubiquinone) activity,oxidoreductase activity, acting on NAD(P)H, quinone or similar compound as acceptor,metal ion binding,quinone binding,4 iron, 4 sulfur cluster binding,NADH dehydrogenase activity	mitochondrial electron transport, NADH to ubiquinone,mitochondrial respiratory chain complex I assembly
1.13289	0.107314	0.0401709	Q9UPT9	USP22	Ubiquitin carboxyl-terminal hydrolase 22	UBP22_HUMAN	3	SAGA complex,nucleoplasm,nuclear speck,SAGA-type complex	transcription coactivator activity,thiol-dependent ubiquitin-specific protease activity,protein binding,zinc ion binding,enzyme binding,ligand-dependent nuclear receptor transcription coactivator activity,thiol-dependent ubiquitinyl hydrolase activity,H4 histone acetyltransferase activity	transcription, DNA-templated,ubiquitin-dependent protein catabolic process,cell cycle,embryo development,histone ubiquitination,histone deubiquitination,protein deubiquitination,histone H4 acetylation,positive regulation of transcription, DNA-templated,positive regulation of mitotic cell cycle
1.13117	2.01169e-07	2.49463e-07	Q9UH65	SWAP70	Switch-associated protein 70	SWP70_HUMAN	10	nucleus,cytoplasm,cytoskeleton,plasma membrane,lamellipodium	DNA binding,calcium ion binding,protein binding,ATP binding,cadherin binding	positive regulation of cytosolic calcium ion concentration,negative regulation of actin filament depolymerization,positive regulation of actin filament bundle assembly,regulation of protein localization,negative regulation of cell-cell adhesion mediated by integrin,isotype switching,actin filament bundle assembly,positive regulation of mast cell chemotaxis,negative regulation of peptidyl-serine d…
1.13055	8.20129e-06	7.98289e-06	Q8NHQ8	RASSF8	Ras association domain-containing protein 8	RASF8_HUMAN	8			signal transduction,adherens junction maintenance
1.12753	1.20921e-17	4.39899e-17	P51003	PAPOLA	Poly(A) polymerase alpha	PAPOA_HUMAN	28	nucleus,nucleoplasm,cytoplasm	magnesium ion binding,RNA binding,polynucleotide adenylyltransferase activity,protein binding,ATP binding,manganese ion binding	mRNA splicing, via spliceosome,termination of RNA polymerase II transcription,mRNA polyadenylation,mRNA 3'-end processing,regulation of mRNA 3'-end processing,RNA polyadenylation
1.12646	0.890667	0.234072	Q6Y1H2	HACD2	Very-long-chain (3R)-3-hydroxyacyl-CoA dehydratase 2	HACD2_HUMAN	1	endoplasmic reticulum,endoplasmic reticulum membrane,integral component of endoplasmic reticulum membrane	protein binding,3-hydroxyacyl-CoA dehydratase activity,enzyme binding,3R-hydroxyacyl-CoA dehydratase activity,Requires Ontology,3-hydroxy-behenoyl-CoA dehydratase activity,3-hydroxy-lignoceroyl-CoA dehydratase activity,protein tyrosine phosphatase activity	sphingolipid biosynthetic process,fatty acid elongation,long-chain fatty-acyl-CoA biosynthetic process,very long-chain fatty acid biosynthetic process
1.12623	4.36329e-06	4.43418e-06	Q9P013	CWC15	Spliceosome-associated protein CWC15 homolog	CWC15_HUMAN	6	nucleus,nucleoplasm,spliceosomal complex,mitochondrion,nuclear speck,catalytic step 2 spliceosome	RNA binding,protein binding	mRNA splicing, via spliceosome
1.12542	1.4795e-07	1.87617e-07	O94842	TOX4	TOX high mobility group box family member 4	TOX4_HUMAN	12	chromatin,PTW/PP1 phosphatase complex,nuclear chromosome, telomeric region	DNA binding,protein binding
1.12484	0.180537	0.0626435	Q9ULK5	VANGL2	Vang-like protein 2	VANG2_HUMAN	3	stress fiber,plasma membrane,cell-cell junction,integral component of membrane,basolateral plasma membrane,apical plasma membrane,lateral plasma membrane,ER to Golgi transport vesicle,cell pole	protein binding	establishment of planar polarity,neural tube closure,hair follicle development,heart looping,membranous septum morphogenesis,muscular septum morphogenesis,planar cell polarity pathway involved in axis elongation,Rho protein signal transduction,anterior/posterior pattern specification,heparan sulfate proteoglycan biosynthetic process,convergent extension involved in neural plate elongation,regulat…
1.12367	1.77085e-27	1.25166e-26	O95613	PCNT	Pericentrin	PCNT_HUMAN	121	centrosome,centriole,microtubule organizing center,cytosol,microtubule,membrane,centriolar satellite	protein binding,calmodulin binding,protein complex scaffold	G2/M transition of mitotic cell cycle,microtubule cytoskeleton organization,mitotic spindle organization,signal transduction,regulation of G2/M transition of mitotic cell cycle,cilium morphogenesis,positive regulation of intracellular protein transport,ciliary basal body docking
1.12275	0.287094	0.0926018	Q96DN6	MBD6	Methyl-CpG-binding domain protein 6	MBD6_HUMAN	2	fibrillar center,nucleus,nucleoplasm,chromocenter	chromatin binding,DNA binding	protein deubiquitination
1.12263	3.15253e-07	3.79768e-07	A0AVT1	UBA6	Ubiquitin-like modifier-activating enzyme 6	UBA6_HUMAN	11	cytoplasm,cytosol	ubiquitin activating enzyme activity,protein binding,ATP binding,FAT10 activating enzyme activity	ubiquitin-dependent protein catabolic process,cellular response to DNA damage stimulus,learning,locomotory behavior,protein ubiquitination,amygdala development,hippocampus development,protein ubiquitination involved in ubiquitin-dependent protein catabolic process,dendritic spine development
1.12238	0.11884	0.0437775	Q8N668	COMMD1	COMM domain-containing protein 1	COMD1_HUMAN	3	nucleus,nucleoplasm,cytoplasm,early endosome,cytosol,endosome membrane,Cul2-RING ubiquitin ligase complex,recycling endosome,extracellular exosome	copper ion binding,protein binding,phosphatidylinositol-4,5-bisphosphate binding,phosphatidylinositol-3,4,5-trisphosphate binding,identical protein binding,protein homodimerization activity,phosphatidylinositol-3,4-bisphosphate binding,phosphatidic acid binding,phosphatidylinositol-3,5-bisphosphate binding	transcription, DNA-templated,Golgi to plasma membrane transport,protein transport,protein ubiquitination,positive regulation of protein ubiquitination,negative regulation of NF-kappaB transcription factor activity,regulation of proteasomal ubiquitin-dependent protein catabolic process,post-translational protein modification,plasma membrane to endosome transport,copper ion homeostasis,negative reg…
1.12192	0.000518032	0.000367574	Q16543	CDC37	Hsp90 co-chaperone Cdc37	CDC37_HUMAN	9	cytoplasm,cytosol,extracellular exosome,HSP90-CDC37 chaperone complex	protein tyrosine kinase activity,protein binding,protein kinase regulator activity,kinase binding,protein kinase binding,heat shock protein binding,unfolded protein binding,chaperone binding,Hsp90 protein binding,scaffold protein binding	regulation of cyclin-dependent protein serine/threonine kinase activity,protein folding,protein targeting,posttranscriptional regulation of gene expression,peptidyl-tyrosine phosphorylation,ERBB2 signaling pathway,protein stabilization,regulation of interferon-gamma-mediated signaling pathway,regulation of type I interferon-mediated signaling pathway,mitophagy in response to mitochondrial depolar…
1.12179	0.0202004	0.00951278	O60443	DFNA5	Non-syndromic hearing impairment protein 5	DFNA5_HUMAN	2	cytosol,plasma membrane,membrane	phosphatidylinositol-4,5-bisphosphate binding,cardiolipin binding	sensory perception of sound,cell death,negative regulation of cell proliferation,positive regulation of MAPK cascade,inner ear receptor cell differentiation,necrotic cell death,pyroptosis,cellular response to tumor necrosis factor,cellular response to virus,positive regulation of intrinsic apoptotic signaling pathway
1.11847	3.11347e-09	4.83393e-09	Q9BX63	BRIP1	Fanconi anemia group J protein	FANCJ_HUMAN	16	nucleus,nucleoplasm,cytoplasm,nuclear membrane	DNA binding,chromatin binding,ATP-dependent DNA helicase activity,protein binding,ATP binding,metal ion binding,4 iron, 4 sulfur cluster binding	DNA damage checkpoint,DNA synthesis involved in DNA repair,strand displacement,DNA replication,double-strand break repair,regulation of transcription from RNA polymerase II promoter,spermatogonial cell division,spermatid development,negative regulation of cell proliferation,response to toxic substance,negative regulation of gene expression,meiotic DNA double-strand break processing involved in re…
1.11596	0.0340875	0.014933	O14737	PDCD5	Programmed cell death protein 5	PDCD5_HUMAN	6	nucleus,cytoplasm,cytosol,extracellular exosome	DNA binding,protein binding,heparin binding,acetyltransferase activator activity,beta-tubulin binding	apoptotic process,negative regulation of cell proliferation,positive regulation of gene expression,positive regulation of apoptotic process,positive regulation of cysteine-type endopeptidase activity involved in apoptotic process,cellular response to transforming growth factor beta stimulus,positive regulation of release of cytochrome c from mitochondria,positive regulation of protein import into…
1.11573	0.163064	0.0574691	Q9Y3E5	PTRH2	Peptidyl-tRNA hydrolase 2, mitochondrial	PTH2_HUMAN	1	mitochondrion,cytosol,membrane	aminoacyl-tRNA hydrolase activity,protein binding	apoptotic process,negative regulation of gene expression,positive regulation of anoikis,negative regulation of anoikis
1.11531	3.49221e-11	6.86283e-11	Q9NSV4	DIAPH3	Protein diaphanous homolog 3	DIAP3_HUMAN	23	nucleus,cytosol	actin binding,Rho GTPase binding,cadherin binding	spermatogenesis,actin cytoskeleton organization
1.11436	0.07899	0.0309635	P62158	CALM1	Calmodulin	CALM_HUMAN	6
1.114	5.76678e-14	1.52641e-13	Q7Z5K2	WAPL	Wings apart-like protein homolog	WAPL_HUMAN	25	chromosome, centromeric region,chromatin,synaptonemal complex,nucleus,nucleoplasm,chromosome,cytoplasm,cytosol,cohesin complex	protein binding	sister chromatid cohesion,mitotic sister chromatid cohesion,negative regulation of DNA replication,response to toxic substance,viral process,negative regulation of chromatin binding,meiotic chromosome segregation,negative regulation of sister chromatid cohesion,positive regulation of fibroblast proliferation,cell division,regulation of chromosome condensation,protein localization to chromatin,reg…
1.11379	0.0032396	0.00190232	Q9Y3S1	WNK2	Serine/threonine-protein kinase WNK2	WNK2_HUMAN	6	cytoplasm,cytosol,plasma membrane	protein serine/threonine kinase activity,ATP binding	protein phosphorylation,negative regulation of cell proliferation,intracellular signal transduction,protein autophosphorylation,negative regulation of ERK1 and ERK2 cascade,positive regulation of canonical Wnt signaling pathway,regulation of ion homeostasis,positive regulation of sodium ion transmembrane transporter activity
1.11238	0.0163998	0.00794428	Q9H910	HN1L	Hematological and neurological expressed 1-like protein	HN1L_HUMAN	6	nucleus,cytosol,plasma membrane
1.11228	0.000707112	0.000487147	Q8WUB8	PHF10	PHD finger protein 10	PHF10_HUMAN	4	nucleus,npBAF complex	metal ion binding	transcription, DNA-templated,regulation of transcription, DNA-templated,nervous system development
1.11173	5.81353e-08	7.73927e-08	P14923	JUP	Junction plakoglobin	PLAK_HUMAN	19	cornified envelope,extracellular region,nucleus,cytoplasm,cytosol,cytoskeleton,intermediate filament,plasma membrane,cell-cell junction,cell-cell adherens junction,zonula adherens,fascia adherens,focal adhesion,cytoplasmic side of plasma membrane,intercalated disc,actin cytoskeleton,apicolateral plasma membrane,lateral plasma membrane,catenin complex,Z disc,desmosome,extracellular matrix,protein-…	transcription coactivator activity,signal transducer activity,structural molecule activity,structural constituent of cell wall,protein binding,protein kinase binding,protein phosphatase binding,protein homodimerization activity,alpha-catenin binding,cadherin binding,cell adhesion molecule binding,cell adhesive protein binding involved in bundle of His cell-Purkinje myocyte communication	desmosome assembly,cytoskeletal anchoring at plasma membrane,signal transduction,cell migration,keratinization,adherens junction organization,adherens junction assembly,regulation of cell proliferation,positive regulation of protein import into nucleus,neutrophil degranulation,detection of mechanical stimulus,positive regulation of sequence-specific DNA binding transcription factor activity,prote…
1.11164	0.00158288	0.00100614	Q9Y3R0	GRIP1	Glutamate receptor-interacting protein 1	GRIP1_HUMAN	5	endoplasmic reticulum,cytosol,plasma membrane,cell junction,dendrite,neuron projection,membrane raft,postsynaptic membrane,recycling endosome	transcription coactivator activity,protein binding,beta-catenin binding,protein C-terminus binding,receptor signaling complex scaffold activity,glucocorticoid receptor binding,androgen receptor binding	protein localization,dendrite development,androgen receptor signaling pathway,intracellular signal transduction,positive regulation of transcription, DNA-templated
1.10886	3.97798e-05	3.48016e-05	Q9BV73	CEP250	Centrosome-associated protein CEP250	CP250_HUMAN	79	centrosome,centriole,microtubule organizing center,cytosol,cilium,protein complex,perinuclear region of cytoplasm,extracellular exosome	protein binding,protein C-terminus binding,protein kinase binding,protein domain specific binding	G2/M transition of mitotic cell cycle,mitotic cell cycle,protein localization,regulation of G2/M transition of mitotic cell cycle,centriole-centriole cohesion,regulation of centriole-centriole cohesion,protein localization to organelle,ciliary basal body docking,positive regulation of protein localization to centrosome,Requires Ontology
1.10555	0.0253326	0.0115691	Q969R5	L3MBTL2	Lethal(3)malignant brain tumor-like protein 2	LMBL2_HUMAN	4	nucleus,nucleoplasm	protein binding,zinc ion binding,methylated histone binding,histone binding	transcription, DNA-templated,regulation of transcription, DNA-templated,chromatin modification,protein sumoylation,negative regulation of G0 to G1 transition
1.10502	0.00626438	0.00341727	O94830	DDHD2	Phospholipase DDHD2	DDHD2_HUMAN	9	endoplasmic reticulum-Golgi intermediate compartment,microtubule organizing center,cytosol,membrane,ER to Golgi transport vesicle	phospholipase activity,triglyceride lipase activity,metal ion binding	phosphatidic acid biosynthetic process,ER to Golgi vesicle-mediated transport,locomotory behavior,visual learning,triglyceride catabolic process,lipid particle organization,positive regulation of mitochondrial fission
1.10311	7.80305e-10	1.30153e-09	O75113	N4BP1	NEDD4-binding protein 1	N4BP1_HUMAN	13	nucleolus,PML body	protein binding	negative regulation of protein ubiquitination,negative regulation of proteasomal ubiquitin-dependent protein catabolic process,cellular response to UV
1.09733	3.99699e-09	6.12149e-09	Q8WXW3	PIBF1	Progesterone-induced-blocking factor 1	PIBF1_HUMAN	26	extracellular space,nucleus,centrosome,microtubule organizing center,centriolar satellite	interleukin-4 receptor binding,protein binding	immune system process,mitotic metaphase plate congression,negative regulation of prostaglandin biosynthetic process,negative regulation of interleukin-12 production,positive regulation of interleukin-10 production,negative regulation of natural killer cell activation,positive regulation of tyrosine phosphorylation of STAT protein,negative regulation of tyrosine phosphorylation of STAT protein,act…
1.09656	0.00111368	0.000733285	Q5THJ4	VPS13D	Vacuolar protein sorting-associated protein 13D	VP13D_HUMAN	13	extracellular exosome
1.09624	4.34044e-45	7.47024e-44	Q8TCU4	ALMS1	Alstrom syndrome protein 1	ALMS1_HUMAN	110	spindle pole,centrosome,cytosol,cilium,centriole	molecular_function,protein binding,alpha-actinin binding	G2/M transition of mitotic cell cycle,regulation of G2/M transition of mitotic cell cycle,endosomal transport,regulation of stress fiber assembly,ciliary basal body docking
1.09614	1.33122e-12	3.05028e-12	Q8TCG1	KIAA1524	Protein CIP2A	CIP2A_HUMAN	24	cytoplasm,cytosol,plasma membrane,integral component of membrane	protein binding,protein homodimerization activity,cadherin binding	spermatogenesis,positive regulation of neural precursor cell proliferation
1.09508	0.0276483	0.0124679	P0C2W1	FBXO45	F-box/SPRY domain-containing protein 1	FBSP1_HUMAN	1	postsynaptic density,cell junction,presynaptic membrane,postsynaptic membrane	protein binding	neuron migration,cellular response to DNA damage stimulus,protein ubiquitination,cerebral cortex radially oriented cell migration,cerebral cortex tangential migration,corticospinal tract morphogenesis,anterior commissure morphogenesis,protein ubiquitination involved in ubiquitin-dependent protein catabolic process,proteasome-mediated ubiquitin-dependent protein catabolic process,synapse assembly …
1.09484	0.0260355	0.011838	Q9H8E8	CSRP2BP	Cysteine-rich protein 2-binding protein	CSR2B_HUMAN	6	nucleus,Ada2/Gcn5/Ada3 transcription activator complex,cytoplasm	histone acetyltransferase activity,protein binding,LIM domain binding	G2/M transition of mitotic cell cycle,histone H3 acetylation
1.09454	1.00525e-12	2.33263e-12	Q15276	RABEP1	Rab GTPase-binding effector protein 1	RABE1_HUMAN	19	endosome,early endosome,endocytic vesicle,early endosome membrane,intracellular membrane-bounded organelle,protein complex,recycling endosome	GTPase activator activity,protein binding,growth factor activity,protein domain specific binding,protein homodimerization activity	endocytosis,apoptotic process,regulation of receptor activity,protein transport,vesicle-mediated transport,positive regulation of GTPase activity,membrane fusion
1.09172	0.424291	0.128192	Q9NQ86	TRIM36	E3 ubiquitin-protein ligase TRIM36	TRI36_HUMAN	2	acrosomal vesicle,cytoplasm,cytosol,cytoskeleton,extracellular exosome	ubiquitin-protein transferase activity,protein binding,zinc ion binding,alpha-tubulin binding	protein polyubiquitination,mitotic cytokinesis,spindle organization,acrosome reaction,regulation of cell cycle,regulation of microtubule cytoskeleton organization
1.09129	8.45129e-25	5.092e-24	A5YKK6	CNOT1	CCR4-NOT transcription complex subunit 1	CNOT1_HUMAN	48	cytoplasmic mRNA processing body,extracellular space,nucleus,cytosol,membrane,CCR4-NOT complex,CCR4-NOT core complex	RNA binding,protein binding,protein domain specific binding,estrogen receptor binding,protein complex scaffold,retinoic acid receptor binding,armadillo repeat domain binding,poly(A)-specific ribonuclease activity	negative regulation of transcription from RNA polymerase II promoter,nuclear-transcribed mRNA poly(A) tail shortening,transcription, DNA-templated,DNA damage response, signal transduction by p53 class mediator resulting in cell cycle arrest,multicellular organism development,positive regulation of cytoplasmic mRNA processing body assembly,negative regulation of translation,negative regulation of …
1.09112	0.0148831	0.00730545	P01893;P04439;P05534;P13746;P30443;P30455;Q09160	HLA-H;HLA-A;HLA-A;HLA-A;HLA-A;HLA-A;HLA-A	Putative HLA class I histocompatibility antigen, alpha chain H;HLA class I histocompatibility antigen, A-3 alpha chain;HLA class I histocompatibility antigen, A-24 alpha chain;HLA class I histocompatibility antigen, A-11 alpha chain;HLA class I histocompatibility antigen, A-1 alpha chain;HLA class I histocompatibility antigen, A-36 alpha chain;HLA class I histocompatibility antigen, A-80 alpha ch…	HLAH_HUMAN;1A03_HUMAN;1A24_HUMAN;1A11_HUMAN;1A01_HUMAN;1A36_HUMAN;1A80_HUMAN	2	Golgi membrane,plasma membrane,integral component of plasma membrane,cell surface,ER to Golgi transport vesicle membrane,phagocytic vesicle membrane,early endosome membrane,azurophil granule membrane,MHC class I protein complex,recycling endosome membrane,integral component of lumenal side of endoplasmic reticulum membrane;;;;;;	receptor binding,beta-2-microglobulin binding,peptide antigen binding;;;;;;	antigen processing and presentation of peptide antigen via MHC class I,antigen processing and presentation of exogenous peptide antigen via MHC class I, TAP-dependent,antigen processing and presentation of exogenous peptide antigen via MHC class I, TAP-independent,immune response,neutrophil degranulation,regulation of immune response,interferon-gamma-mediated signaling pathway,type I interferon s…
1.0895	0.00130967	0.000849363	P98170	XIAP	E3 ubiquitin-protein ligase XIAP	XIAP_HUMAN	10	nucleus,nucleoplasm,cytoplasm,cytosol	ubiquitin-protein transferase activity,protein binding,identical protein binding,cysteine-type endopeptidase inhibitor activity involved in apoptotic process,metal ion binding,ubiquitin protein ligase activity	apoptotic process,cellular response to DNA damage stimulus,Wnt signaling pathway,protein ubiquitination,regulation of BMP signaling pathway,positive regulation of protein ubiquitination,regulation of cell proliferation,negative regulation of apoptotic process,negative regulation of cysteine-type endopeptidase activity involved in apoptotic process,regulation of innate immune response,regulation o…
1.08884	0.00163132	0.00103509	Q147X3	NAA30	N-alpha-acetyltransferase 30	NAA30_HUMAN	1	nucleus,cytoplasm,cytosol,NatC complex,polysome	peptide alpha-N-acetyltransferase activity,protein binding	N-terminal peptidyl-methionine acetylation
1.08874	8.792e-05	7.23027e-05	O14964	HGS	Hepatocyte growth factor-regulated tyrosine kinase substrate	HGS_HUMAN	11	lysosome,endosome,early endosome,cytosol,early endosome membrane,multivesicular body membrane,ESCRT-0 complex,intracellular membrane-bounded organelle,extracellular exosome	protein binding,protein domain specific binding,ubiquitin-like protein ligase binding,metal ion binding	protein targeting to lysosome,signal transduction,negative regulation of cell proliferation,membrane invagination,positive regulation of gene expression,endosomal transport,macroautophagy,protein deubiquitination,multivesicular body assembly,negative regulation of epidermal growth factor receptor signaling pathway,regulation of protein catabolic process,regulation of MAP kinase activity,negative …
1.0887	4.39409e-10	7.57956e-10	Q12768	KIAA0196	WASH complex subunit strumpellin	STRUM_HUMAN	18	nucleoplasm,early endosome,endoplasmic reticulum,cytosol,neuron projection,neuronal cell body,WASH complex	protein binding	oocyte maturation,positive regulation of neuron projection development,protein transport,endosomal transport,polar body extrusion after meiotic divisions,spindle assembly involved in meiosis
1.08775	4.31694e-07	5.09327e-07	Q8NI08	NCOA7	Nuclear receptor coactivator 7	NCOA7_HUMAN	16	intracellular,nucleus	protein binding,ligand-dependent nuclear receptor transcription coactivator activity,nuclear hormone receptor binding	transcription, DNA-templated,positive regulation of transcription from RNA polymerase II promoter,negative regulation of peptidyl-cysteine S-nitrosylation,negative regulation of oxidative stress-induced neuron death
1.08618	0.00533066	0.00295971	Q9NYI0	PSD3	PH and SEC7 domain-containing protein 3	PSD3_HUMAN	6	postsynaptic density,cell junction,ruffle membrane,postsynaptic membrane	ARF guanyl-nucleotide exchange factor activity	regulation of ARF protein signal transduction,regulation of molecular function
1.08515	0.00038154	0.000277238	Q96K17	BTF3L4	Transcription factor BTF3 homolog 4	BT3L4_HUMAN	4		protein binding
1.08468	0.470882	0.139804	P11047	LAMC1	Laminin subunit gamma-1	LAMC1_HUMAN	10	extracellular region,basement membrane,laminin-1 complex,extracellular space,endoplasmic reticulum lumen,extracellular matrix,laminin-10 complex,laminin-11 complex,extracellular exosome	extracellular matrix structural constituent	protein complex assembly,cell adhesion,endoderm development,cell migration,extracellular matrix disassembly,extracellular matrix organization,hemidesmosome assembly,substrate adhesion-dependent cell spreading,post-translational protein modification,cellular protein metabolic process,positive regulation of epithelial cell proliferation
1.08193	4.41365e-10	7.60988e-10	Q9BT25	HAUS8	HAUS augmin-like complex subunit 8	HAUS8_HUMAN	10	spindle pole,centrosome,cytosol,microtubule,HAUS complex	molecular_function,protein binding	G2/M transition of mitotic cell cycle,centrosome cycle,regulation of G2/M transition of mitotic cell cycle,spindle assembly,cell division,ciliary basal body docking
1.08111	0.000305555	0.000227095	Q8NC51	SERBP1	Plasminogen activator inhibitor 1 RNA-binding protein	PAIRB_HUMAN	23	nucleus,cytoplasm,cytosol,plasma membrane,membrane,perinuclear region of cytoplasm,extracellular exosome	RNA binding,mRNA 3'-UTR binding,protein binding,cadherin binding	regulation of apoptotic process,regulation of mRNA stability
1.08075	0.00120911	0.00078988	O43156	TTI1	TELO2-interacting protein 1 homolog	TTI1_HUMAN	2	cytoplasm,TORC1 complex,TORC2 complex	protein binding	regulation of TOR signaling
1.08046	0.0271117	0.0122551	Q969Y2	GTPBP3	tRNA modification GTPase GTPBP3, mitochondrial	GTPB3_HUMAN	1	mitochondrion	GTPase activity,protein binding,GTP binding	tRNA modification
1.08008	0.0262308	0.0119141	Q96B97	SH3KBP1	SH3 domain-containing kinase-binding protein 1	SH3K1_HUMAN	3	cytoplasm,cytosol,cytoskeleton,plasma membrane,cell-cell junction,focal adhesion,endocytic vesicle,cytoplasmic vesicle membrane,neuron projection,synapse	protein binding,SH3 domain binding	endocytosis,apoptotic process,cytoskeleton organization,cell-cell signaling,axon guidance,regulation of cell shape,cell migration,negative regulation of epidermal growth factor receptor signaling pathway,membrane organization
1.07899	1.07282e-07	1.38309e-07	O60293	ZFC3H1	Zinc finger C3H1 domain-containing protein	ZC3H1_HUMAN	17	exosome (RNase complex),extracellular space,nucleus,nucleolus	RNA binding,protein binding,metal ion binding	RNA processing
1.07831	0.000499668	0.000355529	O00750	PIK3C2B	Phosphatidylinositol 4-phosphate 3-kinase C2 domain-containing subunit beta	P3C2B_HUMAN	12	nucleoplasm,cytoplasm,endoplasmic reticulum,cytosol,plasma membrane,phosphatidylinositol 3-kinase complex,endocytic vesicle	lipid kinase activity,protein binding,ATP binding,1-phosphatidylinositol-3-kinase activity,1-phosphatidylinositol-4-phosphate 3-kinase activity,phosphatidylinositol binding	phosphatidylinositol biosynthetic process,biological_process,cellular response to starvation,phosphatidylinositol 3-kinase signaling,cell migration,phosphatidylinositol-3-phosphate biosynthetic process,protein kinase B signaling,phosphatidylinositol phosphorylation,autophagosome organization
1.07817	0.0389601	0.0168172	Q9UIL1	SCOC	Short coiled-coil protein	SCOC_HUMAN	1	Golgi membrane,nucleoplasm,Golgi apparatus,cytosol,endosome,trans-Golgi network	protein binding	positive regulation of macroautophagy,regulation of protein complex stability
1.07803	0.0108291	0.00553349	O75909	CCNK	Cyclin-K	CCNK_HUMAN	5	cyclin K-CDK12 complex,cyclin K-CDK13 complex,nucleus,nucleoplasm	protein serine/threonine kinase activity,cyclin-dependent protein serine/threonine kinase activity,protein binding,RNA polymerase II carboxy-terminal domain kinase activity,cyclin-dependent protein serine/threonine kinase regulator activity,protein kinase binding	regulation of cyclin-dependent protein serine/threonine kinase activity,transcription from RNA polymerase II promoter,transcription elongation from RNA polymerase II promoter,protein phosphorylation,cellular response to DNA damage stimulus,cell cycle,snRNA transcription from RNA polymerase II promoter,negative regulation by host of viral genome replication,positive regulation of cyclin-dependent …
1.0777	0.000963082	0.000642055	Q9H7X7	IFT22	Intraflagellar transport protein 22 homolog	IFT22_HUMAN	3	centrosome,cilium,intraciliary transport particle B,ciliary tip	GTP binding	intraciliary transport involved in cilium morphogenesis
1.07553	0.00012039	9.65585e-05	O75886	STAM2	Signal transducing adapter molecule 2	STAM2_HUMAN	8	nucleoplasm,cytoplasm,cytosol,early endosome membrane,ESCRT-0 complex,intracellular membrane-bounded organelle	protein binding	intracellular protein transport,endosomal transport,macroautophagy,protein deubiquitination,multivesicular body assembly,negative regulation of epidermal growth factor receptor signaling pathway,membrane organization
1.07549	0.0320131	0.0141226	Q99747	NAPG	Gamma-soluble NSF attachment protein	SNAG_HUMAN	1	mitochondrion,lysosomal membrane,SNARE complex,myelin sheath,extracellular exosome	soluble NSF attachment protein activity,protein binding,syntaxin binding	protein complex assembly,intracellular protein transport,intra-Golgi vesicle-mediated transport,protein stabilization,membrane fusion
1.07522	0.104104	0.0391946	Q9BTT6	LRRC1	Leucine-rich repeat-containing protein 1	LRRC1_HUMAN	1	cytoplasm,cytosol,plasma membrane		signal transduction
1.07388	0.229423	0.0767117	P25391	LAMA1	Laminin subunit alpha-1	LAMA1_HUMAN	8	extracellular region,proteinaceous extracellular matrix,basement membrane,laminin-1 complex,laminin-3 complex,extracellular space,membrane,extracellular matrix	receptor binding,extracellular matrix structural constituent,protein binding,protein C-terminus binding	cell adhesion,cell surface receptor signaling pathway,regulation of cell adhesion,extracellular matrix organization,regulation of cell migration,regulation of embryonic development
1.0733	2.806e-07	3.40953e-07	Q13177	PAK2	Serine/threonine-protein kinase PAK 2	PAK2_HUMAN	13	nucleus,cytoplasm,cytosol,plasma membrane,perinuclear region of cytoplasm	protein kinase activity,protein serine/threonine kinase activity,protein binding,ATP binding,protein kinase binding,protein tyrosine kinase activator activity,small GTPase binding,identical protein binding,cadherin binding,Rac GTPase binding	stimulatory C-type lectin receptor signaling pathway,protein phosphorylation,negative regulation of protein kinase activity,apoptotic process,signal transduction,Rho protein signal transduction,regulation of mitotic cell cycle,phosphorylation,cell migration,peptidyl-serine phosphorylation,signal transduction by protein phosphorylation,actin cytoskeleton organization,stress-activated protein kinas…
1.07243	0.847393	0.225415	P07942	LAMB1	Laminin subunit beta-1	LAMB1_HUMAN	10	extracellular region,basement membrane,laminin-1 complex,laminin-2 complex,extracellular space,endoplasmic reticulum lumen,extracellular matrix,laminin-8 complex,laminin-10 complex,perinuclear region of cytoplasm,extracellular exosome	structural molecule activity,extracellular matrix structural constituent,protein binding	cell adhesion,neuronal-glial interaction involved in cerebral cortex radial glia guided migration,extracellular matrix organization,positive regulation of cell migration,neuron projection development,substrate adhesion-dependent cell spreading,endodermal cell differentiation,odontogenesis,post-translational protein modification,cellular protein metabolic process,positive regulation of epithelial …
1.07172	0.00271946	0.00162904	Q9NPJ6	MED4	Mediator of RNA polymerase II transcription subunit 4	MED4_HUMAN	5	nucleus,nucleoplasm,membrane,mediator complex,core mediator complex	RNA polymerase II transcription cofactor activity,transcription cofactor activity,receptor activity,protein binding,ligand-dependent nuclear receptor transcription coactivator activity,vitamin D receptor binding,thyroid hormone receptor binding	regulation of transcription from RNA polymerase II promoter,transcription from RNA polymerase II promoter,transcription initiation from RNA polymerase II promoter,intracellular steroid hormone receptor signaling pathway,androgen receptor signaling pathway,positive regulation of transcription, DNA-templated
1.07163	3.35117e-07	4.02182e-07	P13861	PRKAR2A	cAMP-dependent protein kinase type II-alpha regulatory subunit	KAP2_HUMAN	12	cytoplasm,centrosome,cytosol,plasma membrane,focal adhesion,cAMP-dependent protein kinase complex,membrane,nucleotide-activated protein kinase complex,protein complex,plasma membrane raft,extracellular exosome,ciliary base,axoneme	cAMP-dependent protein kinase inhibitor activity,protein binding,cAMP-dependent protein kinase regulator activity,protein domain specific binding,cAMP binding,ubiquitin protein ligase binding,protein kinase A catalytic subunit binding	renal water homeostasis,blood coagulation,activation of protein kinase A activity,intracellular signal transduction,cellular response to glucagon stimulus,negative regulation of cAMP-dependent protein kinase activity
1.07106	6.90483e-20	3.00122e-19	A0MZ66	SHTN1	Shootin-1	SHOT1_HUMAN	25	cytoplasm,microtubule,microtubule associated complex,microtubule cytoskeleton,lamellipodium,filopodium,axon,growth cone,cell leading edge,perikaryon,axonal growth cone,perinuclear region of cytoplasm	protein binding,kinesin binding,cadherin binding,actin filament binding	substrate-dependent cell migration, cell extension,Ras protein signal transduction,axonogenesis,Cdc42 protein signal transduction,netrin-activated signaling pathway,positive regulation of axon extension,neuron projection morphogenesis,cytoplasmic actin-based contraction involved in cell motility,endoplasmic reticulum polarization,actin filament bundle retrograde transport,regulation of establishm…
1.06779	0.989958	0.254144	Q13555	CAMK2G	Calcium/calmodulin-dependent protein kinase type II subunit gamma	KCC2G_HUMAN	5	nucleoplasm,cytoplasm,cytosol,plasma membrane,postsynaptic density,membrane,endocytic vesicle membrane,sarcoplasmic reticulum membrane,neuron projection	protein serine/threonine kinase activity,calmodulin-dependent protein kinase activity,calcium-dependent protein serine/threonine phosphatase activity,Ras guanyl-nucleotide exchange factor activity,protein binding,calmodulin binding,ATP binding,identical protein binding,protein homodimerization activity	G1/S transition of mitotic cell cycle,MAPK cascade,protein dephosphorylation,calcium ion transport,nervous system development,regulation of skeletal muscle adaptation,peptidyl-serine phosphorylation,peptidyl-threonine phosphorylation,insulin secretion,cell differentiation,intracellular signal transduction,protein autophosphorylation,protein oligomerization,regulation of calcium ion transport,inte…
1.06758	0.878753	0.231511	Q9H8M5	CNNM2	Metal transporter CNNM2	CNNM2_HUMAN	2	integral component of membrane,basolateral plasma membrane,intracellular membrane-bounded organelle	ATP binding,magnesium ion transmembrane transporter activity	magnesium ion homeostasis,magnesium ion transmembrane transport
1.06641	2.16454e-07	2.66951e-07	Q9BQS8	FYCO1	FYVE and coiled-coil domain-containing protein 1	FYCO1_HUMAN	17	lysosome,late endosome,autophagosome,Golgi apparatus,membrane,intracellular membrane-bounded organelle,chaperonin-containing T-complex	protein binding,ATP binding,protein binding involved in protein folding,metal ion binding,unfolded protein binding	'de novo' protein folding,chaperone-mediated protein folding,plus-end-directed vesicle transport along microtubule,positive regulation of autophagosome maturation
1.06625	6.31386e-05	5.33993e-05	O00151	PDLIM1	PDZ and LIM domain protein 1	PDLI1_HUMAN	9	transcription factor complex,cytoskeleton,cell-cell adherens junction,focal adhesion,Z disc	transcription coactivator activity,metal ion binding,cadherin binding involved in cell-cell adhesion	response to hypoxia,regulation of transcription, DNA-templated,response to oxidative stress,cell-cell adhesion
1.0656	0.00624066	0.0034061	Q9P2D3	HEATR5B	HEAT repeat-containing protein 5B	HTR5B_HUMAN	4	membrane,extracellular exosome
1.06495	0.00281574	0.00167964	Q9NPQ8	RIC8A	Synembryn-A	RIC8A_HUMAN	4	cytoplasm,plasma membrane	G-protein alpha-subunit binding,guanyl-nucleotide exchange factor activity,GTPase activator activity,protein binding	in utero embryonic development,vasculature development,G-protein coupled receptor signaling pathway,adenylate cyclase-inhibiting G-protein coupled receptor signaling pathway,visual learning,cell migration involved in gastrulation,positive regulation of GTPase activity,cell-cell adhesion involved in gastrulation,basement membrane organization
1.06415	4.81645e-09	7.30077e-09	Q8N4C6	NIN	Ninein	NIN_HUMAN	32	pericentriolar material,spindle pole,nucleus,nucleolus,centrosome,centriole,microtubule minus-end,mitotic spindle,mitotic spindle pole,ciliary transition fiber,Requires Ontology	calcium ion binding,protein binding,GTP binding	protein localization,centriole-centriole cohesion,microtubule anchoring at centrosome,centrosome localization,centrosome-templated microtubule nucleation
1.06292	0.00603887	0.00330678	Q96DT7	ZBTB10	Zinc finger and BTB domain-containing protein 10	ZBT10_HUMAN	5	nucleoplasm	DNA binding,protein binding,metal ion binding	transcription, DNA-templated,regulation of transcription, DNA-templated
1.06179	0.0664017	0.0266858	Q9BZE9	ASPSCR1	Tether containing UBX domain for GLUT4	ASPC1_HUMAN	1	nucleoplasm,cytosol,plasma membrane,cytoplasmic side of plasma membrane,endomembrane system,vesicle membrane,extrinsic component of membrane,endoplasmic reticulum-Golgi intermediate compartment membrane,intracellular membrane-bounded organelle,perinuclear region of cytoplasm	protein binding	intracellular protein transport,positive regulation of protein modification process,glucose homeostasis,regulation of glucose import
1.06137	0.0113628	0.00576627	Q96F07	CYFIP2	Cytoplasmic FMR1-interacting protein 2	CYFP2_HUMAN	19	nucleus,cytoplasm,cytosol,membrane,cell junction,neuron projection,synapse,perinuclear region of cytoplasm,extracellular exosome	protein binding	apoptotic process,Fc-gamma receptor signaling pathway involved in phagocytosis,positive regulation of proteolysis,vascular endothelial growth factor receptor signaling pathway,positive regulation of neurotrophin TRK receptor signaling pathway,activation of cysteine-type endopeptidase activity,dendrite extension,cell-cell adhesion
1.05969	8.15692e-20	3.49791e-19	Q15643	TRIP11	Thyroid receptor-interacting protein 11	TRIPB_HUMAN	63	Golgi membrane,inner acrosomal membrane,outer acrosomal membrane,nucleus,Golgi apparatus,cis-Golgi network,cytoskeleton,cilium,nuclear speck,transport vesicle	transcription coactivator activity,protein binding	ventricular septum development,chondrocyte differentiation involved in endochondral bone morphogenesis,transcription from RNA polymerase II promoter,protein glycosylation,Golgi organization,intraciliary transport involved in cilium morphogenesis,inner ear receptor stereocilium organization,regulation of nucleic acid-templated transcription
1.05943	0.0530391	0.0219263	Q86TG7	PEG10	Retrotransposon-derived protein PEG10	PEG10_HUMAN	3	nucleus,cytoplasm,cytosol	DNA binding,RNA binding,protein binding,zinc ion binding	apoptotic process,cell differentiation,negative regulation of transforming growth factor beta receptor signaling pathway
1.05938	6.76404e-12	1.42483e-11	O43303	CCP110	Centriolar coiled-coil protein of 110 kDa	CP110_HUMAN	22	centrosome,centriole,cytosol,cilium,protein complex	protein binding	G2/M transition of mitotic cell cycle,centriole replication,regulation of G2/M transition of mitotic cell cycle,protein deubiquitination,ciliary basal body organization,regulation of cytokinesis,positive regulation of cilium assembly,centrosome duplication,ciliary basal body docking,negative regulation of cilium assembly
1.05891	2.62227e-08	3.64912e-08	Q9UPQ0	LIMCH1	LIM and calponin homology domains-containing protein 1	LIMC1_HUMAN	20		actin binding,metal ion binding	actomyosin structure organization
1.05873	0.000889428	0.000599819	Q6PCB5	RSBN1L	Round spermatid basic protein 1-like protein	RSBNL_HUMAN	6	nucleus
1.05785	0.0176428	0.00846332	Q9NR45	NANS	Sialic acid synthase	SIAS_HUMAN	3	cytoplasm,cytosol,extracellular exosome	N-acylneuraminate cytidylyltransferase activity,N-acylneuraminate-9-phosphate synthase activity,N-acetylneuraminate synthase activity	CMP-N-acetylneuraminate biosynthetic process,carbohydrate biosynthetic process
1.05677	0.79679	0.215267	Q68EM7	ARHGAP17	Rho GTPase-activating protein 17	RHG17_HUMAN	9	nucleus,cytosol,plasma membrane,bicellular tight junction	GTPase activator activity,protein binding,SH3 domain binding	signal transduction,positive regulation of GTPase activity,regulation of small GTPase mediated signal transduction
1.05602	0.155379	0.0550947	Q9NZ09	UBAP1	Ubiquitin-associated protein 1	UBAP1_HUMAN	1	ESCRT I complex,cytoplasm,Golgi apparatus,cytosol,plasma membrane,endosome membrane,host cell	protein binding,ubiquitin binding	protein transport,endosomal transport,viral life cycle,ubiquitin-dependent protein catabolic process via the multivesicular body sorting pathway,intracellular transport of virus
1.05432	0.0125898	0.006299	Q6ZSZ5	ARHGEF18	Rho guanine nucleotide exchange factor 18	ARHGI_HUMAN	5	cytosol,cytoskeleton,plasma membrane,apical plasma membrane,cell junction,apical part of cell,extracellular exosome	guanyl-nucleotide exchange factor activity,Rho guanyl-nucleotide exchange factor activity	transforming growth factor beta receptor signaling pathway,G-protein coupled receptor signaling pathway,small GTPase mediated signal transduction,regulation of cell shape,actin cytoskeleton organization,regulation of Rho protein signal transduction,positive regulation of apoptotic process,regulation of small GTPase mediated signal transduction,regulation of molecular function
1.05124	0.0119108	0.00600393	P19174	PLCG1	1-phosphatidylinositol 4,5-bisphosphate phosphodiesterase gamma-1	PLCG1_HUMAN	3	ruffle,cytoplasm,cytosol,plasma membrane,cell-cell junction,COP9 signalosome,lamellipodium,cell projection	phosphatidylinositol phospholipase C activity,phospholipase C activity,receptor signaling protein activity,neurotrophin TRKA receptor binding,calcium ion binding,protein binding,protein kinase binding,receptor tyrosine kinase binding,glutamate receptor binding	activation of MAPKK activity,in utero embryonic development,signal transduction,epidermal growth factor receptor signaling pathway,axon guidance,phospholipid catabolic process,positive regulation of epithelial cell migration,viral process,cell migration,calcium-mediated signaling,Fc-epsilon receptor signaling pathway,Fc-gamma receptor signaling pathway involved in phagocytosis,positive regulation…
1.05094	6.41973e-10	1.08065e-09	Q9NPI6	DCP1A	mRNA-decapping enzyme 1A	DCP1A_HUMAN	16	cytoplasmic mRNA processing body,nucleus,cytoplasm,cytosol,membrane,cytoplasmic ribonucleoprotein granule	mRNA binding,protein binding,enzyme activator activity,hydrolase activity,kinesin binding,enzyme regulator activity,identical protein binding	nuclear-transcribed mRNA catabolic process, nonsense-mediated decay,deadenylation-dependent decapping of nuclear-transcribed mRNA,deadenylation-independent decapping of nuclear-transcribed mRNA,positive regulation of catalytic activity,regulation of mRNA stability,exonucleolytic nuclear-transcribed mRNA catabolic process involved in deadenylation-dependent decay,protein localization to cytoplasmi…
1.05062	6.06882e-10	1.02518e-09	Q8NEY1	NAV1	Neuron navigator 1	NAV1_HUMAN	23	cytoplasm,microtubule,axon initial segment		microtubule bundle formation,neuron migration
1.04883	3.72712e-07	4.44798e-07	Q9HD26	GOPC	Golgi-associated PDZ and coiled-coil motif-containing protein	GOPC_HUMAN	3	Golgi membrane,cytoplasm,lysosomal membrane,Golgi apparatus,plasma membrane,postsynaptic density,membrane,cell junction,trans-Golgi network transport vesicle,dendrite,Golgi-associated vesicle membrane,protein complex,postsynaptic membrane	frizzled binding,protein binding,protein C-terminus binding,GTPase regulator activity,protein homodimerization activity,ion channel binding	ER to Golgi vesicle-mediated transport,Golgi to plasma membrane transport,spermatid nucleus differentiation,negative regulation of anion channel activity,protein transport,cytoplasmic sequestering of CFTR protein,apical protein localization,regulation of catalytic activity,protein homooligomerization,negative regulation of protein localization to cell surface
1.04786	0.0065495	0.00355393	P54198	HIRA	Protein HIRA	HIRA_HUMAN	10	nuclear chromatin,nucleus,nucleoplasm,PML body,protein complex,extracellular exosome	transcription factor activity, sequence-specific DNA binding,transcription corepressor activity,protein binding,nucleosome binding	osteoblast differentiation,DNA replication-independent nucleosome assembly,transcription, DNA-templated,regulation of transcription from RNA polymerase II promoter,gastrulation,anatomical structure morphogenesis,chromatin modification,regulation of chromatin silencing,muscle cell differentiation,negative regulation of nucleic acid-templated transcription
1.04698	4.82167e-12	1.02923e-11	P30622	CLIP1	CAP-Gly domain-containing linker protein 1	CLIP1_HUMAN	17	kinetochore,ruffle,nuclear envelope,endosome,centrosome,cytosol,microtubule,cytoplasmic microtubule,intermediate filament,microtubule cytoskeleton,cytoplasmic vesicle membrane,microtubule plus-end,macropinosome	protein binding,microtubule binding,zinc ion binding,tubulin binding,protein homodimerization activity,metal ion binding,microtubule plus-end binding	mitotic cell cycle,microtubule bundle formation,sister chromatid cohesion,positive regulation of microtubule polymerization,protein transport into plasma membrane raft
1.04654	7.43343e-07	8.47831e-07	Q9Y4F5	CEP170B	Centrosomal protein of 170 kDa protein B	C170B_HUMAN	26	cytoplasm,microtubule
1.04603	8.46066e-08	1.10524e-07	P27816	MAP4	Microtubule-associated protein 4	MAP4_HUMAN	34	cytosol,microtubule,microtubule associated complex,plasma membrane,axoneme,postsynaptic density,microtubule cytoskeleton,neuron projection,extracellular exosome,mitotic spindle	RNA binding,structural molecule activity,protein binding,microtubule binding	mitotic spindle organization,neuron projection development,microtubule sliding,establishment of spindle orientation,cell division,negative regulation of nonmotile primary cilium assembly
1.04593	0.000486482	0.000347177	Q12824	SMARCB1	SWI/SNF-related matrix-associated actin-dependent regulator of chromatin subfamily B member 1	SNF5_HUMAN	5	nuclear chromatin,fibrillar center,nucleus,nucleoplasm,nucleolus,SWI/SNF complex,intracellular membrane-bounded organelle,protein complex,npBAF complex,nBAF complex	RNA polymerase I CORE element sequence-specific DNA binding,p53 binding,DNA binding,transcription coactivator activity,protein binding,Tat protein binding,RNA polymerase II core promoter proximal region sequence-specific DNA binding,RNA polymerase II distal enhancer sequence-specific DNA binding,nucleosomal DNA binding	DNA repair,nucleosome disassembly,chromatin remodeling,transcription, DNA-templated,regulation of transcription from RNA polymerase II promoter,cell cycle,nervous system development,negative regulation of cell proliferation,DNA integration,chromatin modification,cell differentiation,single stranded viral RNA replication via double stranded DNA intermediate,ATP-dependent chromatin remodeling,posit…
1.04547	4.11188e-35	4.49612e-34	Q8IUD2	ERC1	ELKS/Rab6-interacting/CAST family member 1	RB6I2_HUMAN	48	Golgi membrane,cytoplasm,IkappaB kinase complex,presynaptic membrane,synapse,presynaptic active zone	protein binding,Rab GTPase binding,PDZ domain binding,leucine zipper domain binding,cadherin binding	regulation of transcription, DNA-templated,I-kappaB phosphorylation,multicellular organism development,protein transport,retrograde transport, endosome to Golgi,negative regulation of apoptotic process,positive regulation of NF-kappaB transcription factor activity
1.04514	5.38165e-07	6.23823e-07	Q9Y2H2	INPP5F	Phosphatidylinositide phosphatase SAC2	SAC2_HUMAN	15	early endosome,axon,dendrite,early endosome membrane,neuronal cell body,clathrin-coated endocytic vesicle,recycling endosome,clathrin-coated pit	protein binding,inositol monophosphate 1-phosphatase activity,phosphatidylinositol phosphate 5-phosphatase activity,phosphatidylinositol phosphate 4-phosphatase activity,protein homodimerization activity,inositol monophosphate 3-phosphatase activity,inositol monophosphate 4-phosphatase activity	positive regulation of receptor recycling,phosphatidylinositol biosynthetic process,adult locomotory behavior,cardiac muscle hypertrophy in response to stress,phosphatidylinositol catabolic process,negative regulation of peptidyl-serine phosphorylation,negative regulation of tyrosine phosphorylation of STAT protein,phosphatidylinositol dephosphorylation,phosphatidylinositol-mediated signaling,neg…
1.04478	3.77129e-25	2.31959e-24	Q15648	MED1	Mediator of RNA polymerase II transcription subunit 1	MED1_HUMAN	27	ubiquitin ligase complex,chromatin,nucleus,nucleoplasm,nucleolus,membrane,mediator complex,protein-DNA complex	RNA polymerase II core promoter proximal region sequence-specific DNA binding,RNA polymerase II core promoter sequence-specific DNA binding,RNA polymerase II transcription factor activity, sequence-specific DNA binding,core promoter binding,RNA polymerase II transcription cofactor activity,chromatin binding,transcription cofactor activity,transcription coactivator activity,receptor activity,prote…	negative regulation of transcription from RNA polymerase II promoter,cell morphogenesis,angiogenesis,liver development,embryonic placenta development,lens development in camera-type eye,thyroid hormone mediated signaling pathway,ventricular trabecula myocardium morphogenesis,retinal pigment epithelium development,regulation of transcription from RNA polymerase I promoter,transcription initiation …
1.04368	1.55654e-06	1.69764e-06	Q8N9B5	JMY	Junction-mediating and -regulatory protein	JMY_HUMAN	9	nucleus,nucleoplasm,cytoplasm,cytoskeleton,cell leading edge	transcription coactivator activity,actin binding,protein binding,Arp2/3 complex binding	DNA repair,regulation of transcription from RNA polymerase II promoter,cell cycle arrest,Arp2/3 complex-mediated actin nucleation,positive regulation of apoptotic process,positive regulation of sequence-specific DNA binding transcription factor activity,'de novo' actin filament nucleation,actin polymerization-dependent cell motility,intrinsic apoptotic signaling pathway by p53 class mediator,regu…
1.04288	0.00410268	0.00234806	Q4KWH8	PLCH1	1-phosphatidylinositol 4,5-bisphosphate phosphodiesterase eta-1	PLCH1_HUMAN	8	cytoplasm,cytosol,plasma membrane,intracellular membrane-bounded organelle	phosphatidylinositol phospholipase C activity,signal transducer activity,calcium ion binding,calcium-dependent phospholipase C activity	lipid catabolic process,inositol phosphate metabolic process,phosphatidylinositol-mediated signaling
1.04199	0.269675	0.0878347	Q8N1F8	STK11IP	Serine/threonine-protein kinase 11-interacting protein	S11IP_HUMAN	2	extracellular region,cytoplasm,lysosomal membrane,azurophil granule lumen	protein kinase binding	protein localization,neutrophil degranulation
1.04189	0.0405874	0.0174283	Q7Z6B7	SRGAP1	SLIT-ROBO Rho GTPase-activating protein 1	SRGP1_HUMAN	1	cytoplasm,cytosol	GTPase activator activity,protein binding,Rac GTPase binding	signal transduction,negative regulation of cell migration,positive regulation of GTPase activity,regulation of small GTPase mediated signal transduction
1.04085	0.0226586	0.0105067	Q9H160	ING2	Inhibitor of growth protein 2	ING2_HUMAN	1	nucleus,nucleoplasm,Golgi apparatus,cytosol,plasma membrane,Sin3 complex,CCAAT-binding factor complex	DNA binding,chromatin binding,protein binding,protein complex binding,methylated histone binding,phosphatidylinositol binding,metal ion binding	transcription, DNA-templated,regulation of transcription, DNA-templated,male meiosis I,signal transduction,spermatogenesis,spermatid development,negative regulation of cell proliferation,chromatin modification,flagellated sperm motility,positive regulation of transforming growth factor beta receptor signaling pathway,positive regulation of histone deacetylation,regulation of growth,positive regul…
1.0404	1.4653e-38	1.84388e-37	Q9Y5K6	CD2AP	CD2-associated protein	CD2AP_HUMAN	40	ruffle,cytoplasm,plasma membrane,cell-cell junction,actin cytoskeleton,endocytic vesicle,filamentous actin,perinuclear region of cytoplasm,extracellular exosome	vascular endothelial growth factor receptor binding,structural constituent of cytoskeleton,protein binding,beta-catenin binding,protein C-terminus binding,SH3 domain binding,protein complex binding,cadherin binding	protein complex assembly,substrate-dependent cell migration, cell extension,actin filament organization,cell cycle,signal transduction,vesicle organization,negative regulation of transforming growth factor beta1 production,proteasome-mediated ubiquitin-dependent protein catabolic process,regulation of receptor-mediated endocytosis,negative regulation of small GTPase mediated signal transduction,c…
1.03868	5.2936e-10	9.04982e-10	Q53EL6	PDCD4	Programmed cell death protein 4	PDCD4_HUMAN	7	nucleus,cytoplasm,cytosol	RNA binding,protein binding	apoptotic process,cell aging,BMP signaling pathway,interleukin-12-mediated signaling pathway,negative regulation of apoptotic process,negative regulation of JUN kinase activity,negative regulation of cell cycle,negative regulation of transcription, DNA-templated,positive regulation of inflammatory response,epithelial to mesenchymal transition involved in cardiac fibroblast development,cellular re…
1.03816	0.933337	0.243039	O60299	LZTS3	Leucine zipper putative tumor suppressor 3	LZTS3_HUMAN	4	cytoplasm,cytoskeleton,postsynaptic density,cell junction,synapse,postsynaptic membrane		regulation of dendritic spine morphogenesis
1.03712	6.77844e-18	2.52825e-17	Q9NVA2	40787	Septin-11	SEP11_HUMAN	14	stress fiber,cytoplasm,cell junction,axon,dendritic spine,extracellular exosome	protein binding,GTP binding	cell cycle,protein heterooligomerization,cell division
1.03704	6.65513e-10	1.11734e-09	Q8N3F8	MICALL1	MICAL-like protein 1	MILK1_HUMAN	12	late endosome,extrinsic component of membrane,late endosome membrane,recycling endosome membrane,early endosome,trans-Golgi network	protein binding,Rab GTPase binding,identical protein binding,cadherin binding,metal ion binding,phosphatidic acid binding	protein targeting to membrane,endocytosis,receptor-mediated endocytosis,neuron projection development,slow endocytic recycling,protein localization to endosome,membrane tubulation,cellular response to nerve growth factor stimulus,retrograde transport, endosome to plasma membrane
1.03575	0.000522849	0.000370512	Q8NFP9	NBEA	Neurobeachin	NBEA_HUMAN	8	trans-Golgi network,cytosol,plasma membrane,endomembrane system	protein kinase binding	protein localization
1.03498	0.0490945	0.0205256	Q8TED9	AFAP1L1	Actin filament-associated protein 1-like 1	AF1L1_HUMAN	1	podosome,cytoplasm,cell junction,invadopodium	protein binding
1.03356	3.20703e-237	2.05143e-234	Q09666	AHNAK	Neuroblast differentiation-associated protein AHNAK	AHNK_HUMAN	285	nucleus,cytoplasm,lysosomal membrane,cytosol,plasma membrane,focal adhesion,actin cytoskeleton,membrane,T-tubule,vesicle,sarcolemma,costamere,cell-cell contact zone,extracellular exosome,membrane raft	RNA binding,protein binding,S100 protein binding,cadherin binding,structural molecule activity conferring elasticity	regulation of RNA splicing,protein oligomerization,regulation of voltage-gated calcium channel activity
1.0332	2.71572e-07	3.30887e-07	P41236	PPP1R2	Protein phosphatase inhibitor 2	IPP2_HUMAN	3	protein phosphatase type 1 complex	protein serine/threonine phosphatase inhibitor activity,protein binding	glycogen metabolic process,generation of precursor metabolites and energy,regulation of signal transduction,negative regulation of phosphoprotein phosphatase activity,regulation of phosphoprotein phosphatase activity
1.03248	1.29476e-15	3.99782e-15	Q86V48	LUZP1	Leucine zipper protein 1	LUZP1_HUMAN	33	nucleus,membrane,extracellular exosome		ventricular septum development,neural fold bending,artery development
1.03223	0.184962	0.0639707	Q5VWQ8	DAB2IP	Disabled homolog 2-interacting protein	DAB2P_HUMAN	1	cytoplasm,cytosol,plasma membrane,endocytic vesicle,axon,dendrite,intrinsic component of the cytoplasmic side of the plasma membrane,neuronal cell body membrane,neuronal cell body,cerebellar mossy fiber,climbing fiber,extracellular exosome,parallel fiber,AIP1-IRE1 complex	GTPase activator activity,death receptor binding,protein binding,SH3 domain binding,kinase binding,protein kinase binding,mitogen-activated protein kinase kinase binding,mitogen-activated protein kinase kinase kinase binding,phosphatidylinositol-3-phosphate binding,protein complex binding,signaling adaptor activity,phosphatidylinositol 3-kinase regulatory subunit binding,identical protein binding…	negative regulation of transcription from RNA polymerase II promoter,MAPK cascade,activation of MAPKKK activity,angiogenesis,negative regulation of protein phosphorylation,inflammatory response,activation of signaling protein activity involved in unfolded protein response,cell cycle,I-kappaB phosphorylation,activation of JUN kinase activity,negative regulation of cell proliferation,extrinsic apop…
1.03212	1.06947e-07	1.37924e-07	O75717	WDHD1	WD repeat and HMG-box DNA-binding protein 1	WDHD1_HUMAN	19	chromosome, centromeric region,nucleoplasm,cytoplasm	DNA binding,chromatin binding,RNA binding,protein binding,RNA polymerase binding	RNA processing,regulation of chromosome organization,heterochromatin maintenance
1.03113	2.90603e-10	5.13743e-10	Q6ZU35	KIAA1211	Uncharacterized protein KIAA1211	K1211_HUMAN	15
1.03083	0.0153628	0.00751018	Q12968	NFATC3	Nuclear factor of activated T-cells, cytoplasmic 3	NFAC3_HUMAN	4	nucleus,nucleoplasm,cytoplasm,cytosol	RNA polymerase II core promoter proximal region sequence-specific DNA binding,transcriptional activator activity, RNA polymerase II core promoter proximal region sequence-specific binding,transcriptional repressor activity, RNA polymerase II transcription regulatory region sequence-specific binding,protein binding	regulation of transcription from RNA polymerase II promoter,transcription from RNA polymerase II promoter,inflammatory response,Fc-epsilon receptor signaling pathway,positive regulation of transcription from RNA polymerase II promoter,negative regulation of pri-miRNA transcription from RNA polymerase II promoter
1.02999	0.022151	0.0103024	P42336	PIK3CA	Phosphatidylinositol 4,5-bisphosphate 3-kinase catalytic subunit alpha isoform	PK3CA_HUMAN	1	cytoplasm,cytosol,plasma membrane,phosphatidylinositol 3-kinase complex,phosphatidylinositol 3-kinase complex, class IA,lamellipodium	protein serine/threonine kinase activity,protein binding,ATP binding,kinase activity,1-phosphatidylinositol-3-kinase activity,protein kinase activator activity,phosphatidylinositol 3-kinase activity,1-phosphatidylinositol-4-phosphate 3-kinase activity,insulin receptor substrate binding,phosphatidylinositol-4,5-bisphosphate 3-kinase activity	angiogenesis,liver development,vasculature development,adaptive immune response,glucose metabolic process,protein phosphorylation,phosphatidylinositol biosynthetic process,inflammatory response,epidermal growth factor receptor signaling pathway,G-protein coupled receptor signaling pathway,axon guidance,regulation of gene expression,phosphatidylinositol 3-kinase signaling,negative regulation of ma…
1.02945	0.0302259	0.0134423	P23193	TCEA1	Transcription elongation factor A protein 1	TCEA1_HUMAN	1	nucleus,nucleoplasm,transcription factor TFIID complex,nucleolus	DNA binding,protein binding,zinc ion binding	transcription-coupled nucleotide-excision repair,regulation of transcription, DNA-templated,transcription from RNA polymerase II promoter,transcription elongation from RNA polymerase II promoter,positive regulation of exoribonuclease activity
1.02942	5.547e-06	5.55568e-06	Q9NP61	ARFGAP3	ADP-ribosylation factor GTPase-activating protein 3	ARFG3_HUMAN	7	Golgi membrane,Golgi apparatus,cytosol,membrane	GTPase activator activity,protein binding,protein transporter activity,metal ion binding	intracellular protein transport,ER to Golgi vesicle-mediated transport,retrograde vesicle-mediated transport, Golgi to ER,protein secretion,vesicle-mediated transport,positive regulation of GTPase activity
1.02906	0.118799	0.04377	Q8NEL9	DDHD1	Phospholipase DDHD1	DDHD1_HUMAN	4	cytoplasm,cytosol	phospholipase activity,metal ion binding	phosphatidic acid biosynthetic process,lipid catabolic process,positive regulation of mitochondrial fission
1.02857	1.44634e-08	2.06975e-08	Q14155	ARHGEF7	Rho guanine nucleotide exchange factor 7	ARHG7_HUMAN	13	storage vacuole,ruffle,cytosol,plasma membrane,focal adhesion,cell cortex,lamellipodium,neuron projection,neuronal cell body,protein complex	guanyl-nucleotide exchange factor activity,Rho guanyl-nucleotide exchange factor activity,protein binding,protein kinase binding	hematopoietic progenitor cell differentiation,Golgi organization,signal transduction,G-protein coupled receptor signaling pathway,nervous system development,positive regulation of fibroblast migration,lamellipodium assembly,positive regulation of protein binding,regulation of Rho protein signal transduction,intracellular signal transduction,negative regulation of epidermal growth factor receptor …
1.02708	0.307054	0.0979692	Q96MT8	CEP63	Centrosomal protein of 63 kDa	CEP63_HUMAN	10	spindle pole,centrosome,centriole,cytosol	protein binding	DNA damage checkpoint,G2/M transition of mitotic cell cycle,centriole replication,regulation of G2/M transition of mitotic cell cycle,signal transduction in response to DNA damage,spindle assembly,cell division,ciliary basal body docking,de novo centriole assembly
1.02697	0.00663386	0.0035926	Q96Q15	SMG1	Serine/threonine-protein kinase SMG1	SMG1_HUMAN	2	nucleus,nucleoplasm,cytoplasm,cytosol	RNA binding,protein kinase activity,protein serine/threonine kinase activity,protein binding,ATP binding,telomeric DNA binding,metal ion binding	nuclear-transcribed mRNA catabolic process, nonsense-mediated decay,DNA repair,mRNA export from nucleus,response to stress,peptidyl-serine phosphorylation,regulation of telomere maintenance,protein autophosphorylation,phosphatidylinositol phosphorylation
1.02673	3.66911e-24	2.11125e-23	Q96AY4	TTC28	Tetratricopeptide repeat protein 28	TTC28_HUMAN	58	spindle pole,cytoplasm,microtubule organizing center,midbody	kinase binding	cell cycle,regulation of mitotic cell cycle,cell division
1.02452	0.00236981	0.00144096	Q14315	FLNC	Filamin-C	FLNC_HUMAN	2	cytoplasm,cytosol,cytoskeleton,plasma membrane,focal adhesion,sarcoplasm,Z disc,sarcolemma,costamere	protein binding,cytoskeletal protein binding,ankyrin binding,actin filament binding	cell junction assembly,muscle fiber development
1.02447	0.0104352	0.00535361	P61011	SRP54	Signal recognition particle 54 kDa protein	SRP54_HUMAN	5	nucleus,cytoplasm,signal recognition particle, endoplasmic reticulum targeting,cytosol,nuclear speck,nucleolus	RNA binding,protein binding,GTP binding,drug binding,7S RNA binding,GDP binding,endoplasmic reticulum signal peptide binding,ribonucleoprotein complex binding,GTPase activity	SRP-dependent cotranslational protein targeting to membrane,SRP-dependent cotranslational protein targeting to membrane, translocation,SRP-dependent cotranslational protein targeting to membrane, signal sequence recognition,response to drug,protein targeting to ER
1.02433	1.40757e-10	2.56275e-10	Q68CZ6	HAUS3	HAUS augmin-like complex subunit 3	HAUS3_HUMAN	23	nucleoplasm,mitochondrion,centrosome,spindle,cytosol,microtubule,microtubule cytoskeleton,intercellular bridge,HAUS complex,mitotic spindle	molecular_function,protein binding	G2/M transition of mitotic cell cycle,centrosome cycle,regulation of G2/M transition of mitotic cell cycle,spindle assembly,cell division,ciliary basal body docking
1.02334	0.0044723	0.00253204	Q96NL6	SCLT1	Sodium channel and clathrin linker 1	SCLT1_HUMAN	9	centrosome,centriole,cytosol,extracellular exosome,clathrin complex,ciliary transition fiber	protein C-terminus binding,sodium channel regulator activity,clathrin binding	clustering of voltage-gated sodium channels,cilium morphogenesis,regulation of molecular function,ciliary basal body docking
1.02313	1.42359e-06	1.56285e-06	Q96SU4	OSBPL9	Oxysterol-binding protein-related protein 9	OSBL9_HUMAN	10	Golgi apparatus,cytosol,late endosome membrane,intracellular membrane-bounded organelle	lipid binding,sterol transporter activity	bile acid biosynthetic process,sterol transport
1.02199	0.0391554	0.0168833	Q5H9I0	TFDP3	Transcription factor Dp family member 3	TFDP3_HUMAN	1	nucleus,transcription factor complex,cytoplasm	RNA polymerase II transcription factor activity, sequence-specific DNA binding,DNA binding,protein heterodimerization activity	G1/S transition of mitotic cell cycle,transcription, DNA-templated,regulation of transcription from RNA polymerase II promoter,cellular response to DNA damage stimulus
1.02023	0.372772	0.115128	Q9GZT4	SRR	Serine racemase	SRR_HUMAN	1	cytoplasm,plasma membrane,neuronal cell body,apical part of cell	magnesium ion binding,L-serine ammonia-lyase activity,calcium ion binding,ATP binding,D-serine ammonia-lyase activity,glycine binding,threonine racemase activity,PDZ domain binding,pyridoxal phosphate binding,serine racemase activity,protein homodimerization activity	L-serine metabolic process,brain development,aging,serine family amino acid metabolic process,response to lipopolysaccharide,pyruvate biosynthetic process,response to morphine,protein homotetramerization,D-serine metabolic process,D-serine biosynthetic process
1.01916	0.000928038	0.000621933	Q6PII3	CCDC174	Coiled-coil domain-containing protein 174	CC174_HUMAN	5	nucleus,nucleoplasm	protein binding
1.0185	0.00398639	0.00229004	Q9BQI0	AIF1L	Allograft inflammatory factor 1-like	AIF1L_HUMAN	2	cytoplasm,focal adhesion,actin cytoskeleton,ruffle membrane,protein complex,extracellular exosome,actin filament	calcium ion binding,actin filament binding
1.0183	5.81655e-41	7.91628e-40	Q96BY7	ATG2B	Autophagy-related protein 2 homolog B	ATG2B_HUMAN	65	pre-autophagosomal structure,nucleoplasm,lipid particle,extrinsic component of membrane,pre-autophagosomal structure membrane		autophagosome assembly,mitophagy,nucleophagy
1.01812	0.00304982	0.00180053	Q9BZI7	UPF3B	Regulator of nonsense transcripts 3B	REN3B_HUMAN	9	nucleus,nucleoplasm,nucleolus,cytoplasm,microtubule organizing center,cytosol,exon-exon junction complex	RNA binding,mRNA binding,nucleocytoplasmic transporter activity,protein binding	nuclear-transcribed mRNA catabolic process, nonsense-mediated decay,mRNA splicing, via spliceosome,termination of RNA polymerase II transcription,RNA export from nucleus,mRNA export from nucleus,mRNA 3'-end processing,positive regulation of translation
1.01779	0.00420542	0.00239938	Q15369	TCEB1	Transcription elongation factor B polypeptide 1	ELOC_HUMAN	4	nucleoplasm,cytosol,elongin complex	protein binding,ubiquitin-protein transferase activity	regulation of transcription from RNA polymerase II promoter,transcription from RNA polymerase II promoter,transcription elongation from RNA polymerase II promoter,viral process,protein ubiquitination,positive regulation of transcription elongation from RNA polymerase II promoter,interleukin-7-mediated signaling pathway,protein ubiquitination involved in ubiquitin-dependent protein catabolic proce…
1.01699	0.16671	0.0585391	P50552	VASP	Vasodilator-stimulated phosphoprotein	VASP_HUMAN	2	cytosol,plasma membrane,bicellular tight junction,focal adhesion,actin cytoskeleton,lamellipodium membrane,filopodium membrane,extracellular exosome	actin binding,protein binding,profilin binding,SH3 domain binding,cadherin binding	neural tube closure,axon guidance,actin polymerization or depolymerization,positive regulation of actin filament polymerization,cell junction assembly,protein homotetramerization
1.01682	2.85402e-22	1.45083e-21	Q8NFC6	BOD1L1	Biorientation of chromosomes in cell division protein 1-like 1	BD1L1_HUMAN	43	nucleoplasm,chromosome		DNA repair,cellular response to DNA damage stimulus,replication fork processing
1.01588	0.0167006	0.00807369	Q9UHP3	USP25	Ubiquitin carboxyl-terminal hydrolase 25	UBP25_HUMAN	5	nucleus,endoplasmic reticulum,cytosol	thiol-dependent ubiquitin-specific protease activity,protein binding,peptidase activity,ubiquitin protein ligase binding,thiol-dependent ubiquitinyl hydrolase activity,ubiquitin binding,ATPase binding,ubiquitin-specific protease activity involved in negative regulation of ERAD pathway	cellular protein modification process,proteolysis,ubiquitin-dependent protein catabolic process,protein deubiquitination,protein K63-linked deubiquitination,protein K48-linked deubiquitination,negative regulation of ERAD pathway
1.01292	1.6635e-07	2.08848e-07	Q8TF01	PNISR	Arginine/serine-rich protein PNISR	PNISR_HUMAN	5	cytosol,nuclear speck	RNA binding
1.01178	0.475591	0.140929	Q6AI39	GLTSCR1L	GLTSCR1-like protein	GSC1L_HUMAN	2
1.01133	6.08268e-05	5.16376e-05	P28290	SSFA2	Sperm-specific antigen 2	SSFA2_HUMAN	8	nucleus,cytosol,plasma membrane	receptor binding,actin filament binding
1.01114	2.64963e-06	2.79146e-06	Q8NFU7	TET1	Methylcytosine dioxygenase TET1	TET1_HUMAN	14	nucleus	DNA binding,iron ion binding,zinc ion binding,methylcytosine dioxygenase activity	inner cell mass cell differentiation,transcription, DNA-templated,protein O-linked glycosylation,positive regulation of cell proliferation,chromatin modification,stem cell population maintenance,positive regulation of histone methylation,positive regulation of transcription from RNA polymerase II promoter,oxidation-reduction process,DNA demethylation,negative regulation of methylation-dependent c…
1.01072	0.633527	0.178759	Q9UJN7	ZNF391	Zinc finger protein 391	ZN391_HUMAN	2	nucleus	DNA binding,transcription factor activity, sequence-specific DNA binding,metal ion binding	transcription, DNA-templated,regulation of transcription, DNA-templated
1.00997	8.66312e-19	3.46344e-18	Q96PY6	NEK1	Serine/threonine-protein kinase Nek1	NEK1_HUMAN	20	pericentriolar material,nucleus,cytoplasm,centrosome	protein kinase activity,protein serine/threonine kinase activity,protein tyrosine kinase activity,protein binding,ATP binding,kinase activity,metal ion binding,14-3-3 protein binding	protein phosphorylation,cell cycle,regulation of mitotic cell cycle,peptidyl-tyrosine phosphorylation,signal transduction by protein phosphorylation,stress-activated protein kinase signaling cascade,activation of protein kinase activity,DNA damage response, detection of DNA damage,regulation of apoptotic process,cell division,cilium morphogenesis
1.00937	0.260164	0.0852697	Q86XI8	C19orf68	Uncharacterized protein C19orf68	CS068_HUMAN	1	nucleus	protein binding	ubiquitin-dependent protein catabolic process,multicellular organism development
1.00869	0.655015	0.183513	Q9BYI3	FAM126A	Hyccin	HYCCI_HUMAN	3	cytosol,plasma membrane,neuron projection	signal transducer activity,protein binding	signal transduction,myelination,phosphatidylinositol phosphorylation,protein localization to plasma membrane
1.00802	0.20218	0.068889	A8MXV4	NUDT19	Nucleoside diphosphate-linked moiety X motif 19	NUD19_HUMAN	1	cellular_component,mitochondrion,peroxisomal matrix	receptor binding,metal ion binding,acyl-CoA hydrolase activity	biological_process,fatty acid catabolic process
1.00784	1.8047e-10	3.25885e-10	P37802	TAGLN2	Transgelin-2	TAGL2_HUMAN	13	extracellular region,cytosol,vesicle,extracellular exosome	protein binding,cadherin binding	platelet degranulation,epithelial cell differentiation
1.00725	0.248247	0.0820436	Q96P48	ARAP1	Arf-GAP with Rho-GAP domain, ANK repeat and PH domain-containing protein 1	ARAP1_HUMAN	3	nucleoplasm,Golgi apparatus,trans-Golgi network,cytosol,plasma membrane,cytoplasmic vesicle,Golgi cisterna membrane,intracellular membrane-bounded organelle	GTPase activator activity,protein binding,phosphatidylinositol-3,4,5-trisphosphate binding,type 1 angiotensin receptor binding,metal ion binding	positive regulation of receptor recycling,signal transduction,regulation of cell shape,actin filament reorganization involved in cell cycle,positive regulation of GTPase activity,positive regulation of epidermal growth factor receptor signaling pathway,regulation of small GTPase mediated signal transduction,regulation of cellular component movement,positive regulation of filopodium assembly,negat…
1.00706	0.000218481	0.000167205	Q9Y3B2	EXOSC1	Exosome complex component CSL4	EXOS1_HUMAN	3	nuclear exosome (RNase complex),exosome (RNase complex),nucleoplasm,nucleolus,cytoplasm,cytosol	RNA binding,protein binding,exoribonuclease activity	rRNA processing,regulation of mRNA stability,exonucleolytic nuclear-transcribed mRNA catabolic process involved in deadenylation-dependent decay
1.00399	0.000621865	0.000432925	Q6UB99	ANKRD11	Ankyrin repeat domain-containing protein 11	ANR11_HUMAN	5	nucleus,nucleoplasm,cytosol,plasma membrane		in utero embryonic development,tissue homeostasis,multicellular organism growth,odontogenesis of dentin-containing tooth,skeletal system morphogenesis,face morphogenesis,bone development
1.00353	0.0384117	0.0166086	Q6ZU80	CEP128	Centrosomal protein of 128 kDa	CE128_HUMAN	37	spindle pole,centriole,Requires Ontology		protein localization
1.0035	2.59205e-09	4.06385e-09	O15164	TRIM24	Transcription intermediary factor 1-alpha	TIF1A_HUMAN	5	nucleus,nucleoplasm,nuclear euchromatin,perichromatin fibrils,cytosol	p53 binding,chromatin binding,transcription coactivator activity,protein tyrosine kinase activity,ubiquitin-protein transferase activity,receptor binding,protein binding,zinc ion binding,ligand-dependent nuclear receptor binding,estrogen response element binding,ubiquitin protein ligase activity,lysine-acetylated histone binding,methylated histone binding	transcription from RNA polymerase II promoter,negative regulation of cell proliferation,protein ubiquitination,peptidyl-tyrosine phosphorylation,protein catabolic process,regulation of protein stability,regulation of apoptotic process,negative regulation of transcription, DNA-templated,positive regulation of transcription, DNA-templated,protein autophosphorylation,calcium ion homeostasis,regulati…
1.00311	0.00236695	0.00143968	Q9NX55	HYPK	Huntingtin-interacting protein K	HYPK_HUMAN	2	nucleus,nucleoplasm,cytoplasm,microtubule cytoskeleton,protein complex	protein binding,protein N-terminus binding	negative regulation of apoptotic process,protein stabilization
1.00177	0.346562	0.108368	Q9UBQ0	VPS29	Vacuolar protein sorting-associated protein 29	VPS29_HUMAN	2	endosome,early endosome,late endosome,cytosol,endosome membrane,retromer complex,retromer, cargo-selective complex,intracellular membrane-bounded organelle,extracellular exosome	protein binding,zinc ion binding,protein transporter activity	intracellular protein transport,Wnt signaling pathway,retrograde transport, endosome to Golgi,retrograde transport, endosome to plasma membrane,regulation of autophagy
1.00107	0.0584811	0.0238853	Q9H7D0	DOCK5	Dedicator of cytokinesis protein 5	DOCK5_HUMAN	2	cytoplasm,cytosol,plasma membrane	guanyl-nucleotide exchange factor activity,protein binding	small GTPase mediated signal transduction,positive regulation of epithelial cell migration,regulation of molecular function,positive regulation of substrate adhesion-dependent cell spreading,negative regulation of vascular smooth muscle contraction,positive regulation of vascular associated smooth muscle cell migration
1.00047	2.53689e-06	2.6793e-06	O95759	TBC1D8	TBC1 domain family member 8	TBCD8_HUMAN	19	intracellular,endomembrane system,membrane	GTPase activator activity,Rab GTPase binding	intracellular protein transport,blood circulation,positive regulation of cell proliferation,regulation of vesicle fusion,activation of GTPase activity,regulation of cilium assembly
1.00041	0.000130254	0.000103673	Q14186	TFDP1	Transcription factor Dp-1	TFDP1_HUMAN	4	nucleus,nucleoplasm,mitochondrion,cytosol,RNA polymerase II transcription factor complex	RNA polymerase II transcription factor activity, sequence-specific DNA binding,transcription factor activity, sequence-specific DNA binding,transcription coactivator activity,protein binding,transcription factor binding,protein domain specific binding,RNA polymerase II regulatory region sequence-specific DNA binding,transcriptional activator activity, RNA polymerase II transcription regulatory re…	regulation of transcription involved in G1/S transition of mitotic cell cycle,regulation of transcription from RNA polymerase II promoter,transcription from RNA polymerase II promoter,DNA damage response, signal transduction by p53 class mediator resulting in cell cycle arrest,cell proliferation,positive regulation of transcription from RNA polymerase II promoter,negative regulation of G0 to G1 t…
0.998964	6.90624e-70	2.70471e-68	P12270	TPR	Nucleoprotein TPR	TPR_HUMAN	92	kinetochore,nucleus,nuclear envelope,nuclear pore,nucleoplasm,cytoplasm,cytoplasmic dynein complex,extrinsic component of membrane,nuclear membrane,nuclear periphery,nuclear inclusion body,host cell,nuclear pore nuclear basket,mitotic spindle	chromatin binding,RNA binding,mRNA binding,nucleocytoplasmic transporter activity,protein binding,tubulin binding,heat shock protein binding,protein homodimerization activity,mitogen-activated protein kinase binding,dynein complex binding,transporter activity,protein anchor	negative regulation of transcription from RNA polymerase II promoter,MAPK import into nucleus,regulation of glycolytic process,RNA import into nucleus,RNA export from nucleus,mRNA export from nucleus,tRNA export from nucleus,nuclear pore organization,mitotic nuclear envelope disassembly,mitotic spindle assembly checkpoint,regulation of mitotic sister chromatid separation,viral process,protein sum…
0.998447	0.0140204	0.00693164	Q96LI5	CNOT6L	CCR4-NOT transcription complex subunit 6-like	CNO6L_HUMAN	4	nucleus,cytoplasm,cytosol,CCR4-NOT complex	poly(A)-specific ribonuclease activity,protein binding,metal ion binding	nuclear-transcribed mRNA poly(A) tail shortening,transcription, DNA-templated,regulation of transcription, DNA-templated,mRNA processing,DNA damage response, signal transduction by p53 class mediator resulting in cell cycle arrest,positive regulation of cell proliferation,positive regulation of cytoplasmic mRNA processing body assembly,gene silencing by RNA,mRNA destabilization,RNA phosphodiester…
0.998251	9.42174e-21	4.30997e-20	Q96I25	RBM17	Splicing factor 45	SPF45_HUMAN	18	nucleoplasm,spliceosomal complex,protein complex	RNA binding,protein binding	alternative mRNA splicing, via spliceosome,mRNA splicing, via spliceosome,DNA repair,regulation of RNA splicing
0.997706	0.000439492	0.000315934	Q9C0B7	TANGO6	Transport and Golgi organization protein 6 homolog	TNG6_HUMAN	15	integral component of membrane
0.997297	1.34826e-32	1.2969e-31	P55196	MLLT4	Afadin	AFAD_HUMAN	62	nucleoplasm,cytosol,plasma membrane,cell-cell junction,cell-cell adherens junction,nuclear speck,cell junction	protein binding,protein C-terminus binding,Ras GTPase binding,cadherin binding	cell adhesion,signal transduction,cell-cell signaling,regulation of protein localization,adherens junction organization,positive regulation of GTPase activity,establishment of endothelial intestinal barrier
0.997029	0.00063687	0.000442489	Q96EV8	DTNBP1	Dysbindin	DTBP1_HUMAN	4	nucleus,cytoplasm,endoplasmic reticulum membrane,cytosol,endosome membrane,postsynaptic density,microtubule cytoskeleton,sarcoplasm,cell junction,axon,growth cone,midbody,synaptic vesicle membrane,BLOC-1 complex,melanosome membrane,sarcolemma,neuron projection,dendritic spine,postsynaptic membrane,axon cytoplasm	protein binding	positive regulation of neurotransmitter secretion,blood coagulation,anterograde axonal transport,positive regulation of gene expression,regulation of dopamine secretion,neuron projection development,actin cytoskeleton reorganization,negative regulation of protein binding,melanosome organization,regulation of JUN kinase activity,anterograde synaptic vesicle transport,neuron projection morphogenesi…
0.994472	0.0730745	0.0290001	Q9Y608	LRRFIP2	Leucine-rich repeat flightless-interacting protein 2	LRRF2_HUMAN	14	cellular_component	protein binding,LRR domain binding	regulation of transcription, DNA-templated,biological_process,Wnt signaling pathway
0.993688	7.95749e-07	9.05719e-07	Q14BN4	SLMAP	Sarcolemmal membrane-associated protein	SLMAP_HUMAN	8	smooth endoplasmic reticulum,microtubule organizing center,integral component of plasma membrane,sarcolemma	protein binding	muscle contraction,protein localization to plasma membrane,regulation of membrane depolarization during cardiac muscle cell action potential,regulation of sodium ion transmembrane transport,regulation of voltage-gated sodium channel activity
0.992742	7.62939e-23	4.02773e-22	P50851	LRBA	Lipopolysaccharide-responsive and beige-like anchor protein	LRBA_HUMAN	51	lysosome,endoplasmic reticulum,Golgi apparatus,plasma membrane,membrane,integral component of membrane	molecular_function	biological_process
0.992647	0.00714519	0.0038381	Q9Y6B7	AP4B1	AP-4 complex subunit beta-1	AP4B1_HUMAN	1	trans-Golgi network,cytosol,extrinsic component of membrane,AP-4 adaptor complex,clathrin adaptor complex,endosome lumen,trans-Golgi network membrane	protein binding,clathrin binding	protein targeting,protein localization,vesicle-mediated transport
0.99185	7.37409e-67	2.66998e-65	P21333	FLNA	Filamin-A	FLNA_HUMAN	131	extracellular region,nucleus,nucleolus,cytoplasm,cytosol,plasma membrane,cell-cell junction,focal adhesion,actin cytoskeleton,membrane,Z disc,cortical cytoskeleton,extracellular matrix,Myb complex,neuronal cell body,dendritic shaft,perinuclear region of cytoplasm,extracellular exosome,apical dendrite,filamentous actin	G-protein coupled receptor binding,RNA binding,signal transducer activity,protein binding,transcription factor binding,potassium channel regulator activity,Rho GTPase binding,Ral GTPase binding,kinase binding,small GTPase binding,mu-type opioid receptor binding,Fc-gamma receptor I complex binding,protein homodimerization activity,ion channel binding,cadherin binding,SMAD binding,Rac GTPase bindin…	platelet degranulation,adenylate cyclase-inhibiting dopamine receptor signaling pathway,negative regulation of transcription from RNA polymerase I promoter,formation of radial glial scaffolds,cerebral cortex development,platelet activation,regulation of cell migration,actin cytoskeleton reorganization,cell junction assembly,protein localization to cell surface,negative regulation of protein catab…
0.990004	0.000759757	0.000519591	P09496	CLTA	Clathrin light chain A	CLCA_HUMAN	3	spindle,cytosol,plasma membrane,membrane,clathrin coat,clathrin vesicle coat,clathrin coat of trans-Golgi network vesicle,clathrin coat of coated pit,synaptic vesicle membrane,cytoplasmic vesicle,trans-Golgi network membrane,endolysosome membrane,clathrin-coated endocytic vesicle,clathrin complex	molecular_function,structural molecule activity,protein binding,clathrin heavy chain binding,protein complex binding,peptide binding,GTPase binding	intracellular protein transport,microtubule-based movement,cell cycle,antigen processing and presentation of exogenous peptide antigen via MHC class II,low-density lipoprotein particle receptor catabolic process,low-density lipoprotein particle clearance,clathrin coat assembly,cell division,membrane organization,clathrin-dependent endocytosis
0.988279	4.92016e-25	3.00694e-24	Q9Y2W1	THRAP3	Thyroid hormone receptor-associated protein 3	TR150_HUMAN	32	nucleus,nucleoplasm,mediator complex,nuclear speck,extracellular exosome,exon-exon junction complex	core promoter sequence-specific DNA binding,RNA polymerase II transcription cofactor activity,transcription cofactor activity,transcription coactivator activity,RNA binding,receptor activity,protein binding,ATP binding,ligand-dependent nuclear receptor transcription coactivator activity,vitamin D receptor binding,thyroid hormone receptor binding,phosphoprotein binding	regulation of alternative mRNA splicing, via spliceosome,nuclear-transcribed mRNA catabolic process,transcription initiation from RNA polymerase II promoter,mRNA processing,circadian rhythm,RNA splicing,intracellular steroid hormone receptor signaling pathway,androgen receptor signaling pathway,positive regulation of circadian rhythm,positive regulation of transcription, DNA-templated,positive re…
0.988256	0.017206	0.00828151	Q8TEA8	DTD1	D-tyrosyl-tRNA(Tyr) deacylase 1	DTD1_HUMAN	1	nucleolus,cytoplasm,cytosol	tRNA binding,aminoacyl-tRNA editing activity,DNA binding,metal ion binding,D-tyrosyl-tRNA(Tyr) deacylase activity	DNA replication,tRNA metabolic process,Requires Ontology
0.986552	0.206011	0.0699691	Q96RS6	NUDCD1	NudC domain-containing protein 1	NUDC1_HUMAN	2	nucleoplasm,cytosol	protein binding	immune system process
0.984923	0.000203876	0.000156715	P61758	VBP1	Prefoldin subunit 3	PFD3_HUMAN	6	nucleus,cytoplasm,cytosol,polysome,prefoldin complex,intracellular membrane-bounded organelle	protein binding,tubulin binding	protein folding,microtubule-based process,tubulin complex assembly
0.983781	0.0102637	0.0052762	Q9NWS0	PIH1D1	PIH1 domain-containing protein 1	PIHD1_HUMAN	9	nucleus,nucleolus,cytoplasm,pre-snoRNP complex,R2TP complex	RNA polymerase I CORE element sequence-specific DNA binding,protein binding,protein kinase binding,histone binding,ATPase binding,phosphoprotein binding,RNA polymerase I upstream control element sequence-specific DNA binding	box C/D snoRNP assembly,chromatin remodeling,transcription, DNA-templated,rRNA processing,epithelial cell differentiation,positive regulation of protein complex assembly,snoRNA localization,regulation of histone H3-K4 methylation,establishment of protein localization to chromatin,positive regulation of protein serine/threonine kinase activity,positive regulation of histone H4 acetylation,negative…
0.983648	1.11777e-12	2.57812e-12	Q96LB3	IFT74	Intraflagellar transport protein 74 homolog	IFT74_HUMAN	25	nucleus,centrosome,cilium,intraciliary transport particle B,cytoplasmic vesicle,motile cilium,ciliary tip	chromatin binding,protein binding,beta-tubulin binding	keratinocyte development,Notch signaling pathway,determination of left/right symmetry,heart development,positive regulation of cell adhesion mediated by integrin,intraciliary transport involved in cilium morphogenesis,positive regulation of transcription from RNA polymerase II promoter,negative regulation of epithelial cell proliferation,cilium morphogenesis,Requires Ontology
0.982978	0.000995117	0.000661891	Q9UK41	VPS28	Vacuolar protein sorting-associated protein 28 homolog	VPS28_HUMAN	2	ESCRT I complex,cytoplasm,endosome,early endosome,cytosol,plasma membrane,endosome membrane,late endosome membrane,host cell,extracellular exosome	protein binding,protein complex binding,ubiquitin binding	endosomal transport,macroautophagy,viral life cycle,negative regulation of protein ubiquitination,multivesicular body assembly,viral budding via host ESCRT complex,ubiquitin-dependent protein catabolic process via the multivesicular body sorting pathway,protein targeting to vacuole involved in ubiquitin-dependent protein catabolic process via the multivesicular body sorting pathway,positive regul…
0.98277	4.18437e-07	4.94446e-07	O75330	HMMR	Hyaluronan mediated motility receptor	HMMR_HUMAN	18	centrosome,cytosol,plasma membrane,cell surface,microtubule cytoskeleton,membrane	protein binding,hyaluronic acid binding	regulation of G2/M transition of mitotic cell cycle,hyaluronan catabolic process
0.982432	2.8337e-10	5.02113e-10	Q27J81	INF2	Inverted formin-2	INF2_HUMAN	9	perinuclear region of cytoplasm	actin binding,Rho GTPase binding	actin cytoskeleton organization,regulation of mitochondrial fission
0.981499	2.28012e-07	2.80605e-07	Q53EZ4	CEP55	Centrosomal protein of 55 kDa	CEP55_HUMAN	15	centrosome,centriole,microtubule organizing center,plasma membrane,membrane,midbody,cleavage furrow,intercellular bridge,Flemming body	protein binding	mitotic cytokinesis,cell separation after cytokinesis,establishment of protein localization,renal system development,cranial skeletal system development,nucleus organization,mitotic metaphase plate congression
0.981154	0.0915073	0.0351224	Q9P0L0	VAPA	Vesicle-associated membrane protein-associated protein A	VAPA_HUMAN	3	Golgi membrane,endoplasmic reticulum,endoplasmic reticulum membrane,plasma membrane,microtubule cytoskeleton,integral component of membrane,nuclear membrane,vesicle,azurophil granule membrane,endoplasmic reticulum exit site,bicellular tight junction,perinuclear region of cytoplasm	signal transducer activity,protein binding,microtubule binding,protein domain specific binding,FFAT motif binding,cadherin binding,protein heterodimerization activity	ER to Golgi vesicle-mediated transport,signal transduction,cell death,sphingolipid biosynthetic process,neuron projection development,positive regulation of I-kappaB kinase/NF-kappaB signaling,neutrophil degranulation,positive regulation by host of viral release from host cell,negative regulation by host of viral genome replication,positive regulation by host of viral genome replication,membrane …
0.981046	2.22177e-12	4.96631e-12	O43399	TPD52L2	Tumor protein D54	TPD54_HUMAN	9		RNA binding
0.980272	8.42224e-05	6.94853e-05	P22681	CBL	E3 ubiquitin-protein ligase CBL	CBL_HUMAN	9	nucleus,cytosol,plasma membrane,focal adhesion,axon,growth cone,mast cell granule,membrane raft,perinuclear region of cytoplasm,flotillin complex	phosphotyrosine binding,transcription factor activity, sequence-specific DNA binding,ubiquitin-protein transferase activity,signal transducer activity,epidermal growth factor receptor binding,calcium ion binding,protein binding,SH3 domain binding,receptor tyrosine kinase binding,phosphatidylinositol 3-kinase regulatory subunit binding,cadherin binding,ephrin receptor binding,ubiquitin protein lig…	protein polyubiquitination,regulation of transcription, DNA-templated,protein monoubiquitination,cellular response to DNA damage stimulus,cell surface receptor signaling pathway,epidermal growth factor receptor signaling pathway,negative regulation of epidermal growth factor-activated receptor activity,transforming growth factor beta receptor signaling pathway,fibroblast growth factor receptor si…
0.979857	0.710575	0.195848	O43747	AP1G1	AP-1 complex subunit gamma-1	AP1G1_HUMAN	3	Golgi membrane,cytoplasm,lysosomal membrane,Golgi apparatus,cytosol,membrane,AP-type membrane coat adaptor complex,clathrin adaptor complex,clathrin-coated vesicle,cytoplasmic vesicle membrane,clathrin-coated vesicle membrane,clathrin-coated endocytic vesicle membrane,trans-Golgi network membrane,intracellular membrane-bounded organelle,recycling endosome	transporter activity,protein binding,protein transporter activity,Rab GTPase binding,kinesin binding,GTP-dependent protein binding	intracellular protein transport,antigen processing and presentation of exogenous peptide antigen via MHC class II,melanosome organization,endosome to melanosome transport,positive regulation of natural killer cell degranulation,positive regulation of natural killer cell mediated cytotoxicity,regulation of defense response to virus by virus,Golgi to lysosome transport
0.979666	4.64776e-05	4.0194e-05	Q07617	SPAG1	Sperm-associated antigen 1	SPAG1_HUMAN	13	cytoplasm,cytosol	GTP binding,hydrolase activity	single fertilization,axonemal dynein complex assembly
0.978254	0.220772	0.0742159	O14727	APAF1	Apoptotic protease-activating factor 1	APAF_HUMAN	7	extracellular region,nucleus,cytosol,secretory granule lumen,protein complex,apoptosome,extracellular exosome,ficolin-1-rich granule lumen	nucleotide binding,protein binding,ATP binding,cysteine-type endopeptidase activator activity involved in apoptotic process,heat shock protein binding,identical protein binding,ADP binding	response to hypoxia,neural tube closure,apoptotic process,activation of cysteine-type endopeptidase activity involved in apoptotic process,nervous system development,aging,response to nutrient,activation of cysteine-type endopeptidase activity involved in apoptotic process by cytochrome c,cardiac muscle cell apoptotic process,cell differentiation,forebrain development,glial cell apoptotic process…
0.976724	1.85066e-05	1.70168e-05	Q08378	GOLGA3	Golgin subfamily A member 3	GOGA3_HUMAN	24	Golgi membrane,nucleus,nucleoplasm,nucleolus,Golgi apparatus,cytosol,membrane,Golgi transport complex,Golgi cisterna membrane,extrinsic component of Golgi membrane	transporter activity,protein binding,cadherin binding	intra-Golgi vesicle-mediated transport,spermatogenesis
0.976454	0.00894419	0.00468703	O75449	KATNA1	Katanin p60 ATPase-containing subunit A1	KTNA1_HUMAN	5	spindle pole,nucleus,cytoplasm,microtubule organizing center,spindle,microtubule,midbody,mitotic spindle pole	protein binding,ATP binding,microtubule binding,protein heterodimerization activity,microtubule-severing ATPase activity	cell cycle,microtubule severing,cell division
0.975371	0.0177423	0.00850017	O60664	PLIN3	Perilipin-3	PLIN3_HUMAN	8	cytoplasm,endosome,Golgi apparatus,lipid particle,cytosol,endosome membrane,membrane,transport vesicle	protein binding,cadherin binding	vesicle-mediated transport
0.975217	6.20541e-07	7.13706e-07	Q92766	RREB1	Ras-responsive element-binding protein 1	RREB1_HUMAN	11	fibrillar center,nucleus,cytoplasm,nuclear body,nuclear speck,extracellular exosome	RNA polymerase II regulatory region sequence-specific DNA binding,RNA polymerase II core promoter sequence-specific DNA binding,transcriptional activator activity, RNA polymerase II transcription regulatory region sequence-specific binding,metal ion binding	negative regulation of transcription from RNA polymerase II promoter,regulation of transcription, DNA-templated,transcription from RNA polymerase II promoter,Ras protein signal transduction,multicellular organism development,positive regulation of epithelial cell migration,positive regulation of mammary gland epithelial cell proliferation,positive regulation of transcription, DNA-templated,positi…
0.974503	0.00107419	0.000710082	Q6IQ49	SDE2	Protein SDE2 homolog	SDE2_HUMAN	2	nucleus	DNA binding	DNA replication,cell cycle,cell division
0.974328	0.0175378	0.00841797	O94915	FRYL	Protein furry homolog-like	FRYL_HUMAN	9	cell cortex,site of polarized growth		cell morphogenesis,transcription, DNA-templated,regulation of transcription, DNA-templated,neuron projection development,actin filament reorganization
0.974115	1.51107e-05	1.40731e-05	O75592	MYCBP2	E3 ubiquitin-protein ligase MYCBP2	MYCB2_HUMAN	23	nucleus,membrane,intracellular membrane-bounded organelle	protein binding,transferase activity,metal ion binding	transcription, DNA-templated,regulation of transcription, DNA-templated,protein ubiquitination
0.97404	0.081274	0.0317421	O95202	LETM1	LETM1 and EF-hand domain-containing protein 1, mitochondrial	LETM1_HUMAN	1	mitochondrion,mitochondrial inner membrane,integral component of membrane	calcium ion binding,protein binding,calcium:proton antiporter activity,ribosome binding	mitochondrial calcium ion transport,cellular metal ion homeostasis,protein hexamerization,cristae formation,protein homooligomerization,mitochondrial calcium ion homeostasis,Requires Ontology
0.9731	0.0381833	0.016518	O00512	BCL9	B-cell CLL/lymphoma 9 protein	BCL9_HUMAN	5	nucleoplasm,Golgi apparatus,cis-Golgi network,beta-catenin-TCF complex	transcription coactivator activity,protein binding,beta-catenin binding	myotube differentiation involved in skeletal muscle regeneration,somatic stem cell population maintenance,skeletal muscle cell differentiation,positive regulation of transcription from RNA polymerase II promoter,canonical Wnt signaling pathway,beta-catenin-TCF complex assembly,regulation of transforming growth factor beta receptor signaling pathway
0.971473	1.6233e-05	1.50489e-05	Q8IXW5	RPAP2	Putative RNA polymerase II subunit B1 CTD phosphatase RPAP2	RPAP2_HUMAN	9	nucleus,nucleoplasm,nucleolus,cytoplasm,cytosol,DNA-directed RNA polymerase II, holoenzyme	protein serine/threonine phosphatase activity,protein binding,CTD phosphatase activity,metal ion binding	snRNA transcription,snRNA transcription from RNA polymerase II promoter,dephosphorylation of RNA polymerase II C-terminal domain
0.971053	0.556182	0.160643	Q9ULJ3	ZBTB21	Zinc finger and BTB domain-containing protein 21	ZBT21_HUMAN	5	nucleus,nucleoplasm,cytosol	methyl-CpG binding,metal ion binding	transcription, DNA-templated,regulation of transcription, DNA-templated
0.970047	0.378522	0.116613	Q9NV56	MRGBP	MRG/MORF4L-binding protein	MRGBP_HUMAN	1	nucleus,nucleoplasm,NuA4 histone acetyltransferase complex	protein binding	transcription, DNA-templated,regulation of transcription from RNA polymerase II promoter,histone acetylation,regulation of growth
0.968991	0.384338	0.11814	Q93034	CUL5	Cullin-5	CUL5_HUMAN	8	cytosol,Cul5-RING ubiquitin ligase complex,Cul4-RING E3 ubiquitin ligase complex	ubiquitin-protein transferase activity,receptor activity,calcium channel activity,protein binding,ubiquitin protein ligase binding,ubiquitin protein ligase activity	G1/S transition of mitotic cell cycle,cellular response to DNA damage stimulus,cell cycle arrest,cell proliferation,negative regulation of cell proliferation,viral process,ERBB2 signaling pathway,protein ubiquitination involved in ubiquitin-dependent protein catabolic process,post-translational protein modification,calcium ion transmembrane transport,intrinsic apoptotic signaling pathway
0.968891	0.0476293	0.0200221	Q9NQP4	PFDN4	Prefoldin subunit 4	PFD4_HUMAN	2	nucleus,cytoplasm,mitochondrion,cytosol,prefoldin complex	protein binding,unfolded protein binding,chaperone binding	protein folding
0.967193	0.0496874	0.0207351	Q9P253	VPS18	Vacuolar protein sorting-associated protein 18 homolog	VPS18_HUMAN	2	lysosome,lysosomal membrane,early endosome,late endosome,autophagosome,actin filament,AP-3 adaptor complex,clathrin-coated vesicle,HOPS complex,late endosome membrane,CORVET complex	actin binding,protein binding,syntaxin binding,protein binding, bridging,metal ion binding	intracellular protein transport,vesicle docking involved in exocytosis,autophagy,endosome organization,lysosome organization,endosome to lysosome transport,regulation of SNARE complex assembly,viral entry into host cell
0.966315	4.23047e-08	5.73325e-08	Q14320	FAM50A	Protein FAM50A	FA50A_HUMAN	7	nucleus,nucleoplasm	RNA binding	spermatogenesis
0.965815	2.90114e-06	3.03809e-06	O75970	MPDZ	Multiple PDZ domain protein	MPDZ_HUMAN	20	cytoplasm,bicellular tight junction,postsynaptic density,apical plasma membrane,apicolateral plasma membrane,dendrite,cytoplasmic vesicle,Schmidt-Lanterman incisure,postsynaptic membrane	protein binding,protein C-terminus binding	cell adhesion,viral process
0.965625	5.87256e-07	6.77861e-07	Q9H467	CUEDC2	CUE domain-containing protein 2	CUED2_HUMAN	7	nucleoplasm,cytosol,nuclear membrane	protein binding	negative regulation of macrophage cytokine production,negative regulation of cytokine production involved in inflammatory response
0.963216	0.0194589	0.00920646	Q9UNZ2	NSFL1C	NSFL1 cofactor p47	NSF1C_HUMAN	4	nucleus,nucleoplasm,chromosome,Golgi stack,cytosol,plasma membrane,intermediate filament cytoskeleton,VCP-NSFL1C complex	protein binding,phospholipid binding,protein phosphatase regulator activity,ubiquitin binding,ATPase binding	autophagosome assembly,Golgi organization,nuclear envelope reassembly,proteasome-mediated ubiquitin-dependent protein catabolic process,regulation of phosphoprotein phosphatase activity,membrane fusion
0.961571	0.00277797	0.00166073	Q8N960	CEP120	Centrosomal protein of 120 kDa	CE120_HUMAN	7	centrosome,centriole	protein binding,protein C-terminus binding	centrosome cycle,positive regulation of centrosome duplication,cerebral cortex development,neurogenesis,interkinetic nuclear migration,astral microtubule organization,regulation of protein localization,positive regulation of cilium assembly
0.961457	1.02852e-11	2.1303e-11	P38398	BRCA1	Breast cancer type 1 susceptibility protein	BRCA1_HUMAN	16	ubiquitin ligase complex,lateral element,nucleus,nucleoplasm,chromosome,cytoplasm,plasma membrane,gamma-tubulin ring complex,intracellular ribonucleoprotein complex,BRCA1-BARD1 complex,protein complex,BRCA1-A complex	RNA polymerase II transcription coactivator activity,DNA binding,damaged DNA binding,transcription coactivator activity,RNA binding,ubiquitin-protein transferase activity,protein binding,zinc ion binding,tubulin binding,enzyme binding,ubiquitin protein ligase binding,transcription regulatory region DNA binding,androgen receptor binding,RNA polymerase binding	double-strand break repair via homologous recombination,DNA double-strand break processing,DNA synthesis involved in DNA repair,strand displacement,DNA replication,postreplication repair,double-strand break repair,double-strand break repair via nonhomologous end joining,regulation of gene expression by genetic imprinting,regulation of transcription from RNA polymerase II promoter,regulation of tr…
0.960284	0.00226567	0.00138576	Q9H7Z6	KAT8	Histone acetyltransferase KAT8	KAT8_HUMAN	2	histone acetyltransferase complex,kinetochore,nucleus,nucleoplasm,MLL1 complex,MSL complex	histone acetyltransferase activity,protein binding,transcription factor binding,acetyltransferase activity,enzyme binding,methylated histone binding,metal ion binding,histone acetyltransferase activity (H4-K5 specific),histone acetyltransferase activity (H4-K8 specific),histone acetyltransferase activity (H4-K16 specific)	transcription, DNA-templated,regulation of autophagy,histone acetylation,myeloid cell differentiation,histone H4-K5 acetylation,histone H4-K8 acetylation,histone H4-K16 acetylation,negative regulation of transcription, DNA-templated,positive regulation of transcription, DNA-templated
0.960185	0.000195317	0.000150649	Q2M2I8	AAK1	AP2-associated protein kinase 1	AAK1_HUMAN	13	cytoplasm,cytosol,clathrin-coated pit,extrinsic component of plasma membrane,clathrin-coated vesicle,cell leading edge,terminal bouton	protein serine/threonine kinase activity,Notch binding,protein binding,ATP binding,AP-2 adaptor complex binding	protein phosphorylation,endocytosis,regulation of protein localization,positive regulation of Notch signaling pathway,protein autophosphorylation,protein stabilization,membrane organization,regulation of clathrin-dependent endocytosis
0.95863	0.261557	0.0856604	Q04726	TLE3	Transducin-like enhancer protein 3	TLE3_HUMAN	8	nucleus,nucleoplasm	protein binding	transcription, DNA-templated,regulation of transcription, DNA-templated,signal transduction,animal organ morphogenesis,Wnt signaling pathway,beta-catenin-TCF complex assembly
0.958538	0.000704315	0.000485482	P19022	CDH2	Cadherin-2	CADH2_HUMAN	2	cytoplasm,endoplasmic reticulum lumen,plasma membrane,cell-cell junction,cell-cell adherens junction,fascia adherens,focal adhesion,cell surface,postsynaptic density,intercalated disc,integral component of membrane,basolateral plasma membrane,apical plasma membrane,catenin complex,lamellipodium,cell junction,extracellular matrix,sarcolemma,plasma membrane raft,extracellular exosome,cortical actin…	calcium ion binding,protein binding,beta-catenin binding,protein kinase binding,protein phosphatase binding,identical protein binding,alpha-catenin binding,gamma-catenin binding	cell adhesion,homophilic cell adhesion via plasma membrane adhesion molecules,heterophilic cell-cell adhesion via plasma membrane cell adhesion molecules,glial cell differentiation,calcium-dependent cell-cell adhesion via plasma membrane cell adhesion molecules,cell migration,cerebral cortex development,adherens junction organization,positive regulation of MAPK cascade,post-translational protein …
0.957866	5.29675e-05	4.53714e-05	P16949	STMN1	Stathmin	STMN1_HUMAN	4	intracellular,cytoplasm,cytosol,microtubule,membrane,neuron projection,extracellular exosome	signal transducer activity,protein binding,tubulin binding	mitotic cytokinesis,microtubule depolymerization,mitotic spindle organization,signal transduction,axonogenesis,brain development,response to virus,regulation of microtubule polymerization or depolymerization,negative regulation of microtubule polymerization,neuron projection development,negative regulation of Rho protein signal transduction,intracellular signal transduction,hepatocyte growth fact…
0.957634	0.0052976	0.00294413	Q6MZP7	LIN54	Protein lin-54 homolog	LIN54_HUMAN	8	nucleoplasm	DNA binding,protein binding,metal ion binding	transcription, DNA-templated,regulation of transcription, DNA-templated,cell cycle,regulation of cell cycle
0.957527	0.0719873	0.0286456	Q9ULP9	TBC1D24	TBC1 domain family member 24	TBC24_HUMAN	1	cytoplasm,plasma membrane,cell junction,neuromuscular junction,terminal bouton	GTPase activator activity,protein binding	neuron projection development,positive regulation of GTPase activity,regulation of cilium assembly
0.956866	0.0505694	0.0210414	Q15528	MED22	Mediator of RNA polymerase II transcription subunit 22	MED22_HUMAN	1	cytoplasm,mediator complex	RNA polymerase II transcription cofactor activity,protein binding	transcription, DNA-templated,regulation of transcription from RNA polymerase II promoter
0.956286	0.000726365	0.000498621	P35222	CTNNB1	Catenin beta-1	CTNB1_HUMAN	6	spindle pole,intracellular,nucleus,nucleoplasm,transcription factor complex,nuclear euchromatin,cytoplasm,centrosome,cytosol,plasma membrane,cell-cell junction,adherens junction,cell-cell adherens junction,fascia adherens,bicellular tight junction,focal adhesion,cell cortex,membrane,basolateral plasma membrane,lateral plasma membrane,catenin complex,flotillin complex,Z disc,lamellipodium,cell jun…	RNA polymerase II core promoter proximal region sequence-specific DNA binding,RNA polymerase II transcription factor binding,RNA polymerase II activating transcription factor binding,RNA polymerase II transcription coactivator activity,chromatin binding,transcription factor activity, sequence-specific DNA binding,transcription coactivator activity,signal transducer activity,protein binding,protei…	negative regulation of transcription from RNA polymerase II promoter,embryonic axis specification,cell morphogenesis involved in differentiation,patterning of blood vessels,branching involved in ureteric bud morphogenesis,in utero embryonic development,gastrulation with mouth forming second,cell fate specification,endodermal cell fate commitment,neuron migration,epithelial to mesenchymal transiti…
0.955783	0.175244	0.0610999	Q12929	EPS8	Epidermal growth factor receptor kinase substrate 8	EPS8_HUMAN	1	brush border,cell cortex,postsynaptic density,NMDA selective glutamate receptor complex,cell junction,growth cone,vesicle,stereocilium,stereocilium tip,ruffle membrane,extracellular exosome	actin binding,SH3/SH2 adaptor activity,protein binding,Rac GTPase binding	signal transduction,epidermal growth factor receptor signaling pathway,cell proliferation,adult locomotory behavior,regulation of cell shape,positive regulation of signal transduction,exit from mitosis,Rac protein signal transduction,regulation of actin filament length,actin cytoskeleton reorganization,dendritic cell migration,behavioral response to ethanol,barbed-end actin filament capping,actin…
0.955372	0.343491	0.107504	Q96GC9	VMP1	Vacuole membrane protein 1	VMP1_HUMAN	1	pre-autophagosomal structure,autophagosome membrane,nucleolus,endoplasmic reticulum,plasma membrane,membrane,integral component of membrane,endoplasmic reticulum-Golgi intermediate compartment membrane	protein binding	exocytosis,autophagy,endoplasmic reticulum organization,Golgi organization,embryo implantation,cell junction assembly,cell-cell adhesion
0.955039	0.00265662	0.00159513	O14795	UNC13B	Protein unc-13 homolog B	UN13B_HUMAN	5	Golgi apparatus,cytosol,plasma membrane,membrane,cell junction,neuromuscular junction,early phagosome,terminal bouton,calyx of Held,presynaptic active zone,ribbon synapse	calcium ion binding,protein binding,calmodulin binding,phospholipid binding,Rab GTPase binding,diacylglycerol binding,GTP-dependent protein binding	chemical synaptic transmission,neurotransmitter secretion,neuromuscular junction development,positive regulation of synaptic vesicle priming,glutamate secretion,synaptic vesicle exocytosis,synaptic vesicle docking,synaptic vesicle priming,negative regulation of synaptic plasticity,synaptic transmission, glutamatergic,intracellular signal transduction,positive regulation of apoptotic process,regul…
0.954698	1.52959e-05	1.42386e-05	P62380	TBPL1	TATA box-binding protein-like protein 1	TBPL1_HUMAN	3	transcription factor TFIIA complex,cytoplasm	RNA polymerase II core promoter proximal region sequence-specific DNA binding,transcriptional activator activity, RNA polymerase II core promoter proximal region sequence-specific binding,transcription coactivator activity,protein binding	acrosome assembly,dTTP biosynthetic process,DNA-templated transcription, initiation,transcription from RNA polymerase II promoter,spermatid nucleus differentiation,positive regulation of transcription from RNA polymerase II promoter
0.954638	2.68523e-06	2.82663e-06	Q659A1	ICE2	Little elongation complex subunit 2	ICE2_HUMAN	13	nucleoplasm,cytosol,transcription elongation factor complex,Cajal body,nuclear body,transcriptionally active chromatin,histone locus body	protein binding	snRNA transcription from RNA polymerase II promoter,snRNA transcription from RNA polymerase III promoter,positive regulation of transcription from RNA polymerase III promoter
0.954604	0.0846733	0.032879	Q9GZN8	C20orf27	UPF0687 protein C20orf27	CT027_HUMAN	3	cellular_component	molecular_function	biological_process
0.954448	0.0620741	0.025176	Q9NZ52	GGA3	ADP-ribosylation factor-binding protein GGA3	GGA3_HUMAN	7	Golgi apparatus,trans-Golgi network,endosome membrane,clathrin adaptor complex,early endosome membrane,recycling endosome membrane	protein binding,ADP-ribosylation factor binding	intracellular protein transport,vesicle-mediated transport,cellular protein metabolic process,positive regulation of protein catabolic process
0.95272	0.0874534	0.033791	Q96DU7	ITPKC	Inositol-trisphosphate 3-kinase C	IP3KC_HUMAN	4	cytosol,nuclear speck	calmodulin binding,ATP binding,inositol-1,4,5-trisphosphate 3-kinase activity	phosphorylation,inositol phosphate biosynthetic process,inositol phosphate metabolic process
0.950373	0.00102704	0.000681972	P46379	BAG6	Large proline-rich protein BAG6	BAG6_HUMAN	4	nucleus,nucleoplasm,cytoplasm,cytosol,membrane,intracellular membrane-bounded organelle,extracellular exosome,BAT3 complex	receptor binding,protein binding,Hsp70 protein binding,polyubiquitin binding,ubiquitin protein ligase binding,ribosome binding,misfolded protein binding,proteasome binding,ubiquitin-specific protease binding	kidney development,immune response-activating cell surface receptor signaling pathway,ubiquitin-dependent protein catabolic process,apoptotic process,synaptonemal complex assembly,spermatogenesis,brain development,embryo development,proteasomal protein catabolic process,chromatin modification,internal peptidyl-lysine acetylation,natural killer cell activation,cell differentiation,lung development…
0.950322	0.000951773	0.000635366	Q8TEQ0	SNX29	Sorting nexin-29	SNX29_HUMAN	6	extracellular exosome	phosphatidylinositol binding
0.949792	6.28915e-06	6.24845e-06	O14976	GAK	Cyclin-G-associated kinase	GAK_HUMAN	13	Golgi apparatus,cytosol,focal adhesion,membrane,vesicle,intracellular membrane-bounded organelle,synapse,perinuclear region of cytoplasm	protein serine/threonine kinase activity,protein binding,ATP binding,cyclin binding,chaperone binding	protein phosphorylation,receptor-mediated endocytosis,endoplasmic reticulum organization,Golgi organization,cell cycle,negative regulation of neuron projection development,synaptic vesicle uncoating,chaperone mediated protein folding requiring cofactor,membrane organization,clathrin coat disassembly,clathrin-dependent endocytosis,establishment of protein localization to Golgi,protein localization…
0.9479	0.00279466	0.00166862	Q9Y217	MTMR6	Myotubularin-related protein 6	MTMR6_HUMAN	13	nuclear envelope,cytoplasm,cytosol	phosphatidylinositol-3-phosphatase activity,protein serine/threonine phosphatase activity,protein tyrosine phosphatase activity,protein binding,calcium-activated potassium channel activity,phosphatidylinositol-3,5-bisphosphate 3-phosphatase activity,Requires Ontology	protein dephosphorylation,phosphatidylinositol biosynthetic process,peptidyl-tyrosine dephosphorylation,phosphatidylinositol dephosphorylation,potassium ion transmembrane transport
0.947352	1.75472e-07	2.19297e-07	O95391	SLU7	Pre-mRNA-splicing factor SLU7	SLU7_HUMAN	8	nucleus,nucleoplasm,spliceosomal complex,cytoplasm,cytosol,membrane,nuclear speck,small nuclear ribonucleoprotein complex,intracellular membrane-bounded organelle,catalytic step 2 spliceosome	second spliceosomal transesterification activity,protein binding,zinc ion binding,pre-mRNA 3'-splice site binding	RNA splicing, via transesterification reactions,alternative mRNA splicing, via spliceosome,mRNA 3'-splice site recognition,mRNA splicing, via spliceosome,termination of RNA polymerase II transcription,RNA export from nucleus,mRNA export from nucleus,intracellular protein transport,mRNA 3'-end processing,cellular response to heat
0.947299	0.960652	0.248215	Q5VUB5	FAM171A1	Protein FAM171A1	F1711_HUMAN	3	integral component of membrane,extracellular exosome
0.946873	0.000318863	0.00023589	O15372	EIF3H	Eukaryotic translation initiation factor 3 subunit H	EIF3H_HUMAN	9	cytosol,eukaryotic translation initiation factor 3 complex,membrane,extracellular exosome,eukaryotic translation initiation factor 3 complex, eIF3m	RNA binding,protein binding,translation initiation factor activity	translational initiation,regulation of translational initiation
0.946247	0.317138	0.100635	Q96DM3	C18orf8	Uncharacterized protein C18orf8	MIC1_HUMAN	1	lysosomal membrane,late endosome membrane,Mon1-Ccz1 complex		regulation of autophagy
0.946209	0.000285511	0.000213563	Q14689	DIP2A	Disco-interacting protein 2 homolog A	DIP2A_HUMAN	8	nucleus,cell surface	catalytic activity,protein binding	multicellular organism development,metabolic process,negative regulation of gene expression,regulation of apoptotic process
0.94538	0.232302	0.0775598	Q52LR7	EPC2	Enhancer of polycomb homolog 2	EPC2_HUMAN	1	Piccolo NuA4 histone acetyltransferase complex	histone acetyltransferase activity	DNA repair,transcription, DNA-templated,regulation of transcription from RNA polymerase II promoter,histone acetylation
0.944804	0.863998	0.228818	P07737	PFN1	Profilin-1	PROF1_HUMAN	2	nucleus,cytoplasm,cytosol,cytoskeleton,focal adhesion,cell cortex,membrane,extracellular exosome,blood microparticle	adenyl-nucleotide exchange factor activity,RNA binding,actin binding,actin monomer binding,protein binding,phosphatidylinositol-4,5-bisphosphate binding,Rho GTPase binding,cadherin binding,proline-rich region binding	neural tube closure,regulation of transcription from RNA polymerase II promoter,positive regulation of epithelial cell migration,actin cytoskeleton organization,negative regulation of actin filament polymerization,positive regulation of actin filament polymerization,negative regulation of actin filament bundle assembly,positive regulation of actin filament bundle assembly,positive regulation of A…
0.944604	0.650851	0.1826	P11277	SPTB	Spectrin beta chain, erythrocytic	SPTB1_HUMAN	9	Golgi apparatus,cytosol,spectrin,spectrin-associated cytoskeleton,actin cytoskeleton,intrinsic component of the cytoplasmic side of the plasma membrane,protein complex	actin binding,Ras guanyl-nucleotide exchange factor activity,structural constituent of cytoskeleton,protein binding,ankyrin binding,actin filament binding	MAPK cascade,ER to Golgi vesicle-mediated transport,cytoskeleton organization,axon guidance,actin filament capping,regulation of molecular function
0.944175	4.03582e-11	7.86667e-11	Q8N6T3	ARFGAP1	ADP-ribosylation factor GTPase-activating protein 1	ARFG1_HUMAN	13	Golgi apparatus,cytosol,postsynaptic density	GTPase activator activity,protein binding,metal ion binding	ER to Golgi vesicle-mediated transport,retrograde vesicle-mediated transport, Golgi to ER,protein transport,regulation of endocytosis,IRE1-mediated unfolded protein response,positive regulation of GTPase activity
0.94369	0.00981762	0.00508091	O15231	ZNF185	Zinc finger protein 185	ZN185_HUMAN	1	cytoplasm,focal adhesion,actin cytoskeleton	zinc ion binding,actin filament binding
0.942518	2.96902e-13	7.26729e-13	Q96A65	EXOC4	Exocyst complex component 4	EXOC4_HUMAN	31	exocyst,cytoplasm,cytosol,plasma membrane,microvillus,membrane,growth cone membrane,myelin sheath abaxonal region,synapse,Flemming body	protein binding,Ral GTPase binding,PDZ domain binding,protein N-terminus binding	protein targeting to membrane,exocytosis,Golgi to plasma membrane transport,vesicle targeting,vesicle docking involved in exocytosis,chemical synaptic transmission,regulation of macroautophagy,paraxial mesoderm formation
0.941281	0.148467	0.0529766	Q9H1Z4	WDR13	WD repeat-containing protein 13	WDR13_HUMAN	1	nucleoplasm,microtubule organizing center,plasma membrane	promoter-specific chromatin binding	negative regulation of type B pancreatic cell proliferation
0.941031	8.45551e-06	8.21368e-06	O75052	NOS1AP	Carboxyl-terminal PDZ ligand of neuronal nitric oxide synthase protein	CAPON_HUMAN	8	nucleus,mitochondrion,cytosol,Z disc,sarcoplasmic reticulum membrane,perinuclear region of cytoplasm,caveola,T-tubule,nuclear membrane,sarcolemma,inward rectifier potassium channel complex,L-type voltage-gated calcium channel complex	protein binding,nitric-oxide synthase binding	regulation of heart rate by chemical signal,positive regulation of gene expression,positive regulation of nitric oxide mediated signal transduction,regulation of apoptotic process,regulation of nitric oxide biosynthetic process,positive regulation of nitric oxide biosynthetic process,regulation of nitric-oxide synthase activity,positive regulation of nitric-oxide synthase activity,regulation of v…
0.940611	0.0533978	0.0220248	Q15785	TOMM34	Mitochondrial import receptor subunit TOM34	TOM34_HUMAN	3	nucleus,nucleoplasm,mitochondrial outer membrane,cytosol,membrane,integral component of membrane	protein binding,heat shock protein binding	protein targeting to mitochondrion
0.940178	0.0433701	0.018458	Q96C19	EFHD2	EF-hand domain-containing protein D2	EFHD2_HUMAN	9	membrane raft	calcium ion binding,cadherin binding
0.939413	1.9534e-08	2.75024e-08	Q9NZN5	ARHGEF12	Rho guanine nucleotide exchange factor 12	ARHGC_HUMAN	21	cytoplasm,cytosol,membrane,extracellular exosome	G-protein coupled receptor binding,guanyl-nucleotide exchange factor activity,Rho guanyl-nucleotide exchange factor activity,GTPase activator activity,protein binding	G-protein coupled receptor signaling pathway,regulation of Rho protein signal transduction,intracellular signal transduction,positive regulation of apoptotic process,positive regulation of GTPase activity,regulation of small GTPase mediated signal transduction
0.937672	0.193238	0.066337	Q5JTW2	CEP78	Centrosomal protein of 78 kDa	CEP78_HUMAN	4	centrosome,centriole,cytosol,ciliary basal body		G2/M transition of mitotic cell cycle,regulation of G2/M transition of mitotic cell cycle,cilium organization,ciliary basal body docking
0.937285	2.56428e-05	2.30647e-05	Q14241	TCEB3	Transcription elongation factor B polypeptide 3	ELOA1_HUMAN	7	extracellular space,nucleoplasm,elongin complex	protein binding	regulation of transcription from RNA polymerase II promoter,transcription from RNA polymerase II promoter,transcription elongation from RNA polymerase II promoter
0.937248	9.68434e-05	7.88641e-05	Q9UKN8	GTF3C4	General transcription factor 3C polypeptide 4	TF3C4_HUMAN	14	transcription factor TFIIIC complex,nucleus,nucleoplasm,mitochondrion	histone acetyltransferase activity,protein binding,enzyme activator activity,DNA binding	transcription, DNA-templated,transcription from RNA polymerase III promoter,transcription initiation from RNA polymerase III promoter,histone acetylation,5S class rRNA transcription from RNA polymerase III type 1 promoter,tRNA transcription from RNA polymerase III promoter,positive regulation of catalytic activity
0.936859	6.65644e-15	1.92811e-14	O15042	U2SURP	U2 snRNP-associated SURP motif-containing protein	SR140_HUMAN	30	nucleus,nucleoplasm	RNA binding,protein binding	mRNA splicing, via spliceosome
0.93637	0.00357253	0.00207528	P22234	PAICS	Multifunctional protein ADE2	PUR6_HUMAN	14	cytoplasm,cytosol,membrane,extracellular exosome	phosphoribosylaminoimidazole carboxylase activity,phosphoribosylaminoimidazolesuccinocarboxamide synthase activity,protein binding,ATP binding,identical protein binding,cadherin binding	'de novo' IMP biosynthetic process,purine nucleobase biosynthetic process,purine ribonucleoside monophosphate biosynthetic process
0.935298	0.00617599	0.00337245	Q86YM7	HOMER1	Homer protein homolog 1	HOME1_HUMAN	7	cytosol,postsynaptic density,Z disc,cell junction,axon,costamere,apical part of cell,postsynaptic membrane	protein binding,G-protein coupled glutamate receptor binding,signaling adaptor activity,ion channel binding	skeletal muscle contraction,phospholipase C-activating G-protein coupled glutamate receptor signaling pathway,chemical synaptic transmission,positive regulation of signal transduction,behavioral response to cocaine,skeletal muscle fiber development,chemical homeostasis within a tissue,response to calcium ion,positive regulation of calcium ion transport,regulation of calcium ion import,regulation …
0.935071	5.57432e-10	9.48326e-10	Q9BZH6	WDR11	WD repeat-containing protein 11	WDR11_HUMAN	23	nucleus,cytoplasm,lysosomal membrane,cytosol,microtubule cytoskeleton,membrane,integral component of membrane	protein binding
0.934274	4.4182e-06	4.48243e-06	Q6ZSR9	NaN	Uncharacterized protein FLJ45252	YJ005_HUMAN	6
0.932849	0.035805	0.0155946	O60447	EVI5	Ecotropic viral integration site 5 protein homolog	EVI5_HUMAN	5	nucleus,Golgi apparatus,microtubule organizing center,spindle,cytosol,endomembrane system,intracellular membrane-bounded organelle	GTPase activator activity,protein binding,Rab GTPase binding	intracellular protein transport,cell cycle,multicellular organism development,cell proliferation,regulation of vesicle fusion,retrograde transport, endosome to Golgi,positive regulation of GTPase activity,cell division,activation of GTPase activity,regulation of cilium assembly
0.932657	0.343911	0.107618	O95503	CBX6	Chromobox protein homolog 6	CBX6_HUMAN	1	heterochromatin,nucleus,nucleoplasm,PcG protein complex	single-stranded RNA binding,protein binding	negative regulation of transcription from RNA polymerase II promoter,transcription, DNA-templated,chromatin modification
0.930817	0.0102748	0.00528049	Q15723	ELF2	ETS-related transcription factor Elf-2	ELF2_HUMAN	2	nucleus,nucleoplasm,cytosol,nuclear body	RNA polymerase II transcription factor activity, sequence-specific DNA binding,protein binding,sequence-specific DNA binding	transcription, DNA-templated,regulation of transcription from RNA polymerase II promoter,cell differentiation,positive regulation of transcription, DNA-templated,regulation of B cell receptor signaling pathway
0.930262	0.00252807	0.00152439	P51572	BCAP31	B-cell receptor-associated protein 31	BAP31_HUMAN	5	mitochondrion,endoplasmic reticulum,endoplasmic reticulum membrane,lipid particle,cytosol,integral component of plasma membrane,membrane,clathrin-coated vesicle,Golgi cisterna membrane,endoplasmic reticulum-Golgi intermediate compartment membrane,integral component of lumenal side of endoplasmic reticulum membrane,perinuclear endoplasmic reticulum,Sec61 translocon complex	protein binding,protein complex binding,MHC class I protein binding	antigen processing and presentation of peptide antigen via MHC class I,intracellular protein transport,ER to Golgi vesicle-mediated transport,positive regulation of cytosolic calcium ion concentration,spermatogenesis,negative regulation of endoplasmic reticulum calcium ion concentration,calcium-mediated signaling using intracellular calcium source,positive regulation of cysteine-type endopeptidas…
0.930084	2.39004e-11	4.77014e-11	O60502	MGEA5	Protein O-GlcNAcase	OGA_HUMAN	16	nucleus,cytosol,membrane	hyalurononglucosaminidase activity,beta-N-acetylglucosaminidase activity,Requires Ontology	N-acetylglucosamine metabolic process,protein O-linked glycosylation,glycoprotein catabolic process,protein deglycosylation
0.929213	5.71204e-12	1.21022e-11	Q7Z3T8	ZFYVE16	Zinc finger FYVE domain-containing protein 16	ZFY16_HUMAN	23	early endosome,cytosol,early endosome membrane,intracellular membrane-bounded organelle	protein binding,1-phosphatidylinositol binding,phosphatidylinositol-3,4,5-trisphosphate binding,protein transporter activity,metal ion binding	protein targeting to lysosome,signal transduction,vesicle organization,endosomal transport,regulation of endocytosis,BMP signaling pathway
0.92903	0.0339689	0.0148895	Q9BZV1	UBXN6	UBX domain-containing protein 6	UBXN6_HUMAN	3	nucleus,cytoplasm,lysosomal membrane,microtubule organizing center,cytosol,extrinsic component of membrane,early endosome membrane,late endosome membrane,protein complex,extracellular exosome	protein binding	macroautophagy,endosome to lysosome transport via multivesicular body sorting pathway,ERAD pathway
0.928749	6.65704e-21	3.07457e-20	Q3V6T2	CCDC88A	Girdin	GRDN_HUMAN	35	endoplasmic reticulum,Golgi apparatus,centrosome,centriole,cytosol,plasma membrane,membrane,lamellipodium,cytoplasmic vesicle,ciliary basal body	actin binding,microtubule binding,phosphatidylinositol binding,protein homodimerization activity,protein kinase B binding,dynein light intermediate chain binding	regulation of protein phosphorylation,DNA replication,regulation of DNA replication,regulation of neuron projection development,cell migration,lamellipodium assembly,cytoskeleton-dependent intracellular transport,cytoplasmic microtubule organization,TOR signaling,activation of protein kinase B activity,regulation of actin cytoskeleton organization,regulation of cell proliferation,positive regulat…
0.928337	0.000158745	0.000124187	Q4LE39	ARID4B	AT-rich interactive domain-containing protein 4B	ARI4B_HUMAN	7	cellular_component,nucleus,nucleoplasm,cytoplasm	molecular_function,histone deacetylase activity,protein binding,transcription regulatory region DNA binding	regulation of gene expression by genetic imprinting,transcription, DNA-templated,regulation of transcription from RNA polymerase II promoter,spermatogenesis,biological_process,histone deacetylation,histone H4-K20 trimethylation,histone H3-K9 trimethylation,positive regulation of transcription from RNA polymerase II promoter,establishment of Sertoli cell barrier
0.92686	5.28672e-13	1.26263e-12	Q96ST3	SIN3A	Paired amphipathic helix protein Sin3a	SIN3A_HUMAN	28	kinetochore,nucleus,nucleoplasm,transcription factor complex,nucleolus,Sin3 complex,transcriptional repressor complex	transcription regulatory region sequence-specific DNA binding,RNA polymerase II activating transcription factor binding,RNA polymerase II repressing transcription factor binding,RNA polymerase II transcription corepressor activity,chromatin binding,transcription factor activity, sequence-specific DNA binding,RNA binding,protein binding,protein complex binding,protein deacetylase activity,histone …	negative regulation of transcription from RNA polymerase II promoter,in utero embryonic development,activation of innate immune response,positive regulation of defense response to virus by host,hematopoietic progenitor cell differentiation,DNA replication,transcription, DNA-templated,protein deacetylation,aging,regulation of hormone levels,positive regulation of G2/M transition of mitotic cell cy…
0.926468	0.0533954	0.0220248	Q9UBB6	NCDN	Neurochondrin	NCDN_HUMAN	2	cytosol,membrane,dendrite,neuronal cell body,nucleus,axon	protein binding	neuron projection development,bone resorption,regulation of neuronal synaptic plasticity
0.925681	0.847619	0.225444	Q92989	CLP1	Polyribonucleotide 5'-hydroxyl-kinase Clp1	CLP1_HUMAN	3	tRNA-intron endonuclease complex,nucleus,nucleoplasm,cytosol,mRNA cleavage factor complex	ATP binding,ATP-dependent polydeoxyribonucleotide 5'-hydroxyl-kinase activity,polydeoxyribonucleotide kinase activity,ATP-dependent polyribonucleotide 5'-hydroxyl-kinase activity	mRNA splicing, via spliceosome,termination of RNA polymerase II transcription,mRNA polyadenylation,mRNA cleavage,tRNA splicing, via endonucleolytic cleavage and ligation,phosphorylation,cerebellar cortex development,targeting of mRNA for destruction involved in RNA interference,mRNA 3'-end processing,siRNA loading onto RISC involved in RNA interference
0.925359	0.0330538	0.0145337	Q9HAW4	CLSPN	Claspin	CLSPN_HUMAN	4	nucleoplasm,Golgi apparatus	DNA binding,protein binding,anaphase-promoting complex binding	DNA damage checkpoint,DNA replication,DNA repair,mitotic G2 DNA damage checkpoint,protein deubiquitination,peptidyl-serine phosphorylation,activation of protein kinase activity,mitotic DNA replication checkpoint,execution phase of apoptosis
0.924639	0.000661132	0.000458019	Q6FI81	CIAPIN1	Anamorsin	CPIN1_HUMAN	5	nucleoplasm,nucleolus,cytoplasm,mitochondrion,mitochondrial intermembrane space	protein binding,methyltransferase activity,metal ion binding,2 iron, 2 sulfur cluster binding	apoptotic process,iron-sulfur cluster assembly,hemopoiesis,methylation,negative regulation of apoptotic process
0.92368	0.012798	0.00639065	Q9UHR4	BAIAP2L1	Brain-specific angiogenesis inhibitor 1-associated protein 2-like protein 1	BI2L1_HUMAN	11	nucleoplasm,cytosol,plasma membrane,cell-cell adherens junction,extracellular exosome,actin cytoskeleton	actin binding,protein binding,proline-rich region binding,cadherin binding involved in cell-cell adhesion	plasma membrane organization,insulin receptor signaling pathway,response to bacterium,positive regulation of actin filament polymerization,regulation of insulin receptor signaling pathway,actin filament bundle assembly,actin crosslink formation,cell-cell adhesion,positive regulation of actin cytoskeleton reorganization
0.922805	0.0294529	0.0131549	P62316	SNRPD2	Small nuclear ribonucleoprotein Sm D2	SMD2_HUMAN	6	nucleoplasm,spliceosomal complex,U5 snRNP,U1 snRNP,U2 snRNP,U4 snRNP,U12-type spliceosomal complex,cytosol,small nuclear ribonucleoprotein complex,methylosome,pICln-Sm protein complex,SMN-Sm protein complex,U4/U6 x U5 tri-snRNP complex,extracellular exosome,precatalytic spliceosome,catalytic step 2 spliceosome	RNA binding,protein binding	spliceosomal complex assembly,spliceosomal snRNP assembly,mRNA splicing, via spliceosome,RNA splicing,nuclear import
0.922715	0.181095	0.0627917	Q9H9E3	COG4	Conserved oligomeric Golgi complex subunit 4	COG4_HUMAN	5	Golgi membrane,Golgi transport complex,trans-Golgi network membrane	protein binding	retrograde transport, vesicle recycling within Golgi,ER to Golgi vesicle-mediated transport,retrograde vesicle-mediated transport, Golgi to ER,Golgi organization,protein transport,Golgi vesicle prefusion complex stabilization
0.921086	0.000422005	0.000304332	Q9H1D9	POLR3F	DNA-directed RNA polymerase III subunit RPC6	RPC6_HUMAN	2	nucleoplasm,DNA-directed RNA polymerase III complex,cytosol	double-stranded DNA binding,DNA-directed RNA polymerase activity,protein binding,RNA polymerase III activity	regulation of transcription from RNA polymerase III promoter,transcription from RNA polymerase III promoter,positive regulation of type I interferon production,positive regulation of interferon-beta production,innate immune response,positive regulation of innate immune response,defense response to virus
0.919815	0.00550579	0.00304748	Q63HK5	TSHZ3	Teashirt homolog 3	TSH3_HUMAN	7	nucleus,nucleoplasm,growth cone	transcriptional repressor activity, RNA polymerase II core promoter proximal region sequence-specific binding,DNA binding,chromatin binding,protein binding,metal ion binding	negative regulation of transcription from RNA polymerase II promoter,regulation of respiratory gaseous exchange by neurological system process,transcription, DNA-templated,regulation of transcription from RNA polymerase II promoter,multicellular organism development,negative regulation of transcription, DNA-templated,positive regulation of synaptic transmission, glutamatergic,long-term synaptic p…
0.918894	3.87341e-11	7.58091e-11	O94986	CEP152	Centrosomal protein of 152 kDa	CE152_HUMAN	31	pericentriolar material,nucleoplasm,centrosome,centriole,cytosol,deuterosome	protein binding,protein kinase binding	G2/M transition of mitotic cell cycle,centriole replication,regulation of G2/M transition of mitotic cell cycle,centrosome duplication,ciliary basal body docking,de novo centriole assembly
0.91876	6.87159e-08	9.06918e-08	Q7Z589	EMSY	BRCA2-interacting transcriptional repressor EMSY	EMSY_HUMAN	19	nucleoplasm	protein binding,protein homodimerization activity	DNA repair,transcription, DNA-templated,regulation of transcription, DNA-templated,chromatin modification
0.916759	7.56814e-09	1.12627e-08	Q9Y2Z0	SUGT1	Protein SGT1 homolog	SGT1_HUMAN	16	ubiquitin ligase complex,kinetochore,nucleus,cytosol,protein complex	protein binding	mitotic cell cycle,regulation of protein stability,positive regulation by host of symbiont catalytic activity
0.916573	1.7316e-07	2.1669e-07	P29084	GTF2E2	Transcription initiation factor IIE subunit beta	T2EB_HUMAN	7	nucleus,nucleoplasm,transcription factor TFIID complex,transcription factor TFIIE complex,cytosol,nuclear speck	DNA binding,RNA binding,protein binding	regulation of transcription, DNA-templated,transcription from RNA polymerase II promoter,transcription initiation from RNA polymerase II promoter,transcription elongation from RNA polymerase II promoter,snRNA transcription from RNA polymerase II promoter
0.916428	3.96393e-07	4.71739e-07	Q8TF46	DIS3L	DIS3-like exonuclease 1	DI3L1_HUMAN	10	cytoplasmic exosome (RNase complex),centrosome,cytosol,plasma membrane	3'-5'-exoribonuclease activity,RNA binding,protein binding,enzyme binding	rRNA processing,rRNA catabolic process,RNA phosphodiester bond hydrolysis, exonucleolytic
0.916098	1.60869e-05	1.49206e-05	Q8TDY2	RB1CC1	RB1-inducible coiled-coil protein 1	RBCC1_HUMAN	11	endoplasmic reticulum membrane,cytosol,nuclear membrane,pre-autophagosomal structure membrane,ATG1/ULK1 kinase complex	protein binding,protein kinase binding,protein complex scaffold	autophagosome assembly,mitophagy,liver development,positive regulation of protein phosphorylation,transcription, DNA-templated,regulation of transcription, DNA-templated,autophagy,cell cycle,heart development,macroautophagy,regulation of macroautophagy,pexophagy,positive regulation of cell size,positive regulation of JNK cascade,reticulophagy,glycophagy,negative regulation of extrinsic apoptotic …
0.91604	0.0646282	0.0260851	Q14145	KEAP1	Kelch-like ECH-associated protein 1	KEAP1_HUMAN	10	nucleoplasm,cytoplasm,endoplasmic reticulum,microtubule organizing center,cytosol,actin filament,midbody,Cul3-RING ubiquitin ligase complex,protein complex	protein binding,transcription factor binding,protein homodimerization activity,disordered domain specific binding,ubiquitin-protein transferase activity	in utero embryonic development,transcription, DNA-templated,proteasomal ubiquitin-independent protein catabolic process,protein ubiquitination,protein deubiquitination,positive regulation of proteasomal ubiquitin-dependent protein catabolic process,cytoplasmic sequestering of transcription factor,negative regulation of sequence-specific DNA binding transcription factor activity,post-translational…
0.914176	4.63082e-23	2.48575e-22	P35580	MYH10	Myosin-10	MYH10_HUMAN	218	stress fiber,nucleus,cytoplasm,cytosol,polysome,cell cortex,myosin complex,myosin II complex,lamellipodium,midbody,cleavage furrow,actomyosin,extracellular exosome,myosin II filament	microfilament motor activity,actin binding,protein binding,calmodulin binding,ATP binding,ATPase activity,actin-dependent ATPase activity,RNA stem-loop binding,ADP binding,mRNA 5'-UTR binding,actin filament binding	mitotic cytokinesis,cell adhesion,regulation of cell shape,actin filament-based movement,actomyosin structure organization,positive regulation of protein secretion
0.913414	0.0804317	0.0314515	Q92844	TANK	TRAF family member-associated NF-kappa-B activator	TANK_HUMAN	2	cytosol,protein complex	protein binding,ubiquitin protein ligase binding,deubiquitinase activator activity,metal ion binding,thiol-dependent ubiquitin-specific protease activity	proteolysis,cellular response to DNA damage stimulus,signal transduction,I-kappaB kinase/NF-kappaB signaling,viral process,TRIF-dependent toll-like receptor signaling pathway,negative regulation of I-kappaB kinase/NF-kappaB signaling,cellular response to interleukin-1,cellular response to tumor necrosis factor,cellular response to ionizing radiation,positive regulation of protein deubiquitination…
0.912976	4.81548e-05	4.15321e-05	Q9UJX4	ANAPC5	Anaphase-promoting complex subunit 5	APC5_HUMAN	23	nucleus,nucleoplasm,anaphase-promoting complex,cytosol	protein phosphatase binding	anaphase-promoting complex-dependent catabolic process,protein ubiquitination involved in ubiquitin-dependent protein catabolic process,proteasome-mediated ubiquitin-dependent protein catabolic process,cell division,negative regulation of ubiquitin-protein ligase activity involved in mitotic cell cycle,positive regulation of ubiquitin-protein ligase activity involved in regulation of mitotic cell…
0.91204	0.00146114	0.000937144	Q96L73	NSD1	Histone-lysine N-methyltransferase, H3 lysine-36 and H4 lysine-20 specific	NSD1_HUMAN	6	nucleoplasm,chromosome	RNA polymerase II core promoter sequence-specific DNA binding,chromatin binding,transcription cofactor activity,transcription corepressor activity,protein binding,zinc ion binding,histone-lysine N-methyltransferase activity,estrogen receptor binding,histone methyltransferase activity (H4-K20 specific),retinoic acid receptor binding,retinoid X receptor binding,thyroid hormone receptor binding,hist…	negative regulation of transcription from RNA polymerase II promoter,regulation of histone H3-K36 methylation,transcription, DNA-templated,histone H3-K36 methylation,histone methylation,regulation of peptidyl-serine phosphorylation,histone H4-K20 methylation,positive regulation of transcription, DNA-templated,regulation of RNA polymerase II regulatory region sequence-specific DNA binding
0.910916	2.54373e-06	2.68578e-06	Q9HCS7	XAB2	Pre-mRNA-splicing factor SYF1	SYF1_HUMAN	26	Prp19 complex,nucleus,nucleoplasm,membrane,prespliceosome,catalytic step 1 spliceosome,catalytic step 2 spliceosome,post-mRNA release spliceosomal complex	protein binding	generation of catalytic spliceosome for first transesterification step,mRNA splicing, via spliceosome,blastocyst development,transcription-coupled nucleotide-excision repair,transcription, DNA-templated,cerebral cortex development
0.910754	3.63341e-12	7.88747e-12	Q96JH7	VCPIP1	Deubiquitinating protein VCIP135	VCIP1_HUMAN	38	cytoplasm,endoplasmic reticulum lumen,Golgi stack	thiol-dependent ubiquitin-specific protease activity	mitotic cell cycle,endoplasmic reticulum membrane fusion,protein ubiquitination,protein deubiquitination,protein K11-linked deubiquitination,protein K48-linked deubiquitination,Golgi reassembly
0.910476	0.492853	0.145293	Q9Y6A4	CFAP20	Cilia- and flagella-associated protein 20	CFA20_HUMAN	4	nucleus,centriole,microtubule,cilium,ciliary basal body,extracellular exosome	RNA binding,protein binding	multicellular organism development,protein polyglutamylation,cilium morphogenesis,regulation of cilium beat frequency involved in ciliary motility,positive regulation of cell motility,positive regulation of feeding behavior
0.908684	0.00560983	0.00309792	Q96MX6	WDR92	WD repeat-containing protein 92	WDR92_HUMAN	10		protein binding,ubiquitin binding	apoptotic process
0.908392	0.208208	0.070586	Q6IA86	ELP2	Elongator complex protein 2	ELP2_HUMAN	5	histone acetyltransferase complex,cytoplasm,cytosol,transcription elongation factor complex,Elongator holoenzyme complex	protein kinase binding,RNA polymerase II core binding	tRNA wobble uridine modification,regulation of transcription from RNA polymerase II promoter,transcription elongation from RNA polymerase II promoter,regulation of JAK-STAT cascade
[truncated: 4,145 more rows]

## Sheet: 2_ PSMC2-BirA vs BirA-Ctr
logFC	P.value	Q.value	ID	Gene	Description	Short.name	Unique.peptides	Cellular.component	Molecular.function	Biological.process
[truncated: 4,973 more rows]

[truncated: 1 more sheets: 3_BirA-PSMD3 vs BirA-Ctr]
