# Supplementary material for: ProteasomeID: quantitative mapping of proteasome interactomes and substrates for in vitro and in vivo studies
Source: bioRxiv preprint, doi:10.1101/2022.08.09.503299, version 3 (2024-03-01)
Supplement: Supplemental Table 4 [file 503299_file05.xlsx]

## Sheet: Column key
Tab	Column Header	Meaning
1,3	logFC	log2 (fold change) transformed ratios of averaged replicates
1,3	P.value	P value from unpaired, two-sided Student’s t test moderated by the empirical Bayes method
1,3	Q.value	P value adjusted for multiple testing using the Benjamini-Hochberg method
1-3	ID	UniProt ID
1-3	Gene	Gene symbol
1-3	Description	Description of the protein
1-3	Unique.peptides	Number of unique peptides used to identify the protein
1-3	Cellular.component	Subcellular location of the protein
1-3	Molecular.function	Molecular function of the protein
1-3	Biological.process	Biological proocess that the protein is involved in
2	Ubi.MG132.increase	Was identified protein also detected as having increased ubiquitylation upon cell treatment with MG132? Ubiquitylation data source: Trulsson et al. Nat Commun 2022, https://doi.org/10.1038/s41467-022-30376-7

## Sheet: 1_PSMA4-mTurboID_MG132
# Output candidates table from Spectronaut for comparison of PSMA4-miniTurboID_MG132_treated vs. PSMA4-miniTurboID_not_treated cell lines.
logFC	Pvalue	Qvalue	ID	Gene	Description	Unique.peptides	Cellular.component	Molecular.function	Biological.process
4.94798	9.75886e-07	4.63761e-06	P55061	TMBIM6	Bax inhibitor 1	2	nucleus,cytoplasm,endoplasmic reticulum,endoplasmic reticulum membrane,integral component of plasma membrane,membrane,integral component of membrane,mitochondrial membrane	protein binding,enzyme binding,ubiquitin protein ligase binding,endoribonuclease inhibitor activity	autophagy,response to unfolded protein,negative regulation of calcium ion transport into cytosol,negative regulation of protein binding,endoplasmic reticulum calcium ion homeostasis,negative regulation of apoptotic process,negative regulation of immunoglobulin secretion,negative regulation of endoribonuclease activity,intrinsic apoptotic signaling pathway in response to endoplasmic reticulum stre…
4.43	0.00430488	0.00766967	P05109	S100A8	Protein S100-A8	7	extracellular region,extracellular space,nucleus,cytosol,cytoskeleton,plasma membrane,secretory granule lumen,intermediate filament cytoskeleton,extracellular exosome	calcium ion binding,protein binding,microtubule binding,zinc ion binding,Toll-like receptor 4 binding,arachidonic acid binding,RAGE receptor binding	cytokine production,toll-like receptor signaling pathway,leukocyte migration involved in inflammatory response,acute inflammatory response,chronic inflammatory response,positive regulation of peptide secretion,autophagy,apoptotic process,activation of cysteine-type endopeptidase activity involved in apoptotic process,inflammatory response,response to zinc ion,astrocyte development,peptidyl-cystei…
4.4212	2.88606e-07	1.49205e-06	Q9BXM7	PINK1	Serine/threonine-protein kinase PINK1, mitochondrial	3	chromatin,nucleus,cytoplasm,mitochondrion,mitochondrial outer membrane,mitochondrial inner membrane,mitochondrial intermembrane space,cytosol,cytoskeleton,membrane,axon,growth cone,integral component of mitochondrial outer membrane,cell body,perinuclear region of cytoplasm,Lewy body,astrocyte projection,ubiquitin ligase complex,mitochondrial outer membrane translocase complex,TORC2 complex	magnesium ion binding,protease binding,protein kinase activity,protein serine/threonine kinase activity,protein binding,ATP binding,calcium-dependent protein kinase activity,kinase activity,peptidase activator activity,ubiquitin protein ligase binding,protein kinase B binding,C3HC4-type RING finger domain binding	mitophagy,positive regulation of protein phosphorylation,regulation of oxidative phosphorylation,response to ischemia,protein phosphorylation,ubiquitin-dependent protein catabolic process,response to stress,response to oxidative stress,mitochondrion organization,regulation of hydrogen peroxide metabolic process,negative regulation of gene expression,regulation of mitochondrion organization,positi…
4.3619	0.00890539	0.0138313	P06702	S100A9	Protein S100-A9	6	extracellular region,extracellular space,nucleus,nucleoplasm,cytoplasm,cytosol,cytoskeleton,plasma membrane,cell junction,extracellular matrix,secretory granule lumen,extracellular exosome	signal transducer activity,calcium ion binding,protein binding,microtubule binding,zinc ion binding,antioxidant activity,Toll-like receptor 4 binding,arachidonic acid binding,RAGE receptor binding	cytokine production,toll-like receptor signaling pathway,leukocyte migration involved in inflammatory response,positive regulation of peptide secretion,regulation of translation,autophagy,apoptotic process,activation of cysteine-type endopeptidase activity involved in apoptotic process,inflammatory response,cell-cell signaling,astrocyte development,antimicrobial humoral response,positive regulati…
4.10005	0.0869341	0.0821954	Q9H920	RNF121	RING finger protein 121	3	Golgi membrane,endoplasmic reticulum membrane,integral component of membrane	metal ion binding,ubiquitin protein ligase activity	protein ubiquitination,ER-associated ubiquitin-dependent protein catabolic process,endoplasmic reticulum unfolded protein response
4.07568	0.000906682	0.00204537	P17861	XBP1	X-box-binding protein 1	2	nucleus,nucleoplasm,cytoplasm,endoplasmic reticulum,endoplasmic reticulum membrane,integral component of membrane	RNA polymerase II regulatory region sequence-specific DNA binding,RNA polymerase II transcription factor activity, sequence-specific DNA binding,core promoter binding,RNA polymerase II transcription factor binding,enhancer sequence-specific DNA binding,DNA binding,transcription factor activity, sequence-specific DNA binding,protein binding,protein heterodimerization activity	angiogenesis,liver development,endothelial cell proliferation,positive regulation of immunoglobulin production,transcription from RNA polymerase II promoter,ubiquitin-dependent protein catabolic process,fatty acid biosynthetic process,autophagy,immune response,positive regulation of transcription from RNA polymerase II promoter involved in unfolded protein response,muscle organ development,positi…
4.04995	0.257717	0.183372	P47929	LGALS7	Galectin-7	3	extracellular space,nucleus,cytoplasm,extracellular exosome	carbohydrate binding	apoptotic process,heterophilic cell-cell adhesion via plasma membrane cell adhesion molecules
4.0346	1.10479e-12	1.26159e-11	Q99576	TSC22D3	TSC22 domain family protein 3	5	nucleus,cytoplasm,cytosol	transcription factor activity, sequence-specific DNA binding,MRF binding	negative regulation of transcription from RNA polymerase II promoter,regulation of transcription, DNA-templated,response to osmotic stress,ion transmembrane transport,negative regulation of skeletal muscle tissue development,negative regulation of activation-induced cell death of T cells
4.03458	1.1368e-12	1.29392e-11	Q13118	KLF10	Krueppel-like factor 10	5	nucleus	RNA polymerase II core promoter proximal region sequence-specific DNA binding,core promoter sequence-specific DNA binding,transcriptional activator activity, RNA polymerase II core promoter proximal region sequence-specific binding,transcription factor activity, sequence-specific DNA binding,protein binding,metal ion binding	negative regulation of transcription from RNA polymerase II promoter,skeletal system development,transcription from RNA polymerase II promoter,transforming growth factor beta receptor signaling pathway,cell-cell signaling,circadian rhythm,cell proliferation,negative regulation of cell proliferation,cellular response to starvation,bone mineralization,somatic stem cell population maintenance,regula…
4.01148	4.48604e-06	1.86143e-05	P04035	HMGCR	3-hydroxy-3-methylglutaryl-coenzyme A reductase	2	peroxisomal membrane,endoplasmic reticulum,endoplasmic reticulum membrane,integral component of membrane	hydroxymethylglutaryl-CoA reductase (NADPH) activity,protein binding,hydroxymethylglutaryl-CoA reductase activity,protein homodimerization activity,coenzyme binding,protein phosphatase 2A binding,NADPH binding	cholesterol biosynthetic process,ubiquinone metabolic process,aging,response to nutrient,isoprenoid biosynthetic process,visual learning,negative regulation of striated muscle cell apoptotic process,positive regulation of cardiac muscle cell apoptotic process,coenzyme A metabolic process,regulation of lipid metabolic process,positive regulation of stress-activated MAPK cascade,negative regulation…
3.99425	2.92395e-17	5.23469e-16	P14314	PRKCSH	Glucosidase 2 subunit beta	7	intracellular,endoplasmic reticulum,endoplasmic reticulum lumen	protein kinase C binding,calcium ion binding,ion channel binding,phosphoprotein binding	protein folding,N-glycan processing,intracellular signal transduction,post-translational protein modification,cellular protein metabolic process
3.98533	1.8141e-09	1.32693e-08	Q7L5D6	GET4	Golgi to ER traffic protein 4 homolog	5	nucleoplasm,nucleolus,cytoplasm,cytosol,BAT3 complex	protein binding,chaperone binding	cytoplasmic sequestering of protein,tail-anchored membrane protein insertion into ER membrane,maintenance of unfolded protein involved in ERAD pathway
3.97176	9.69055e-07	4.61141e-06	P18848	ATF4	Cyclic AMP-dependent transcription factor ATF-4	4	nucleus,nucleoplasm,cytoplasm,dendrite membrane,nuclear periphery,neuron projection,protein complex,Lewy body core,ATF4-CREB1 transcription factor complex,ATF1-ATF4 transcription factor complex,CHOP-ATF4 complex,centrosome	RNA polymerase II core promoter proximal region sequence-specific DNA binding,RNA polymerase II transcription factor activity, sequence-specific DNA binding,core promoter sequence-specific DNA binding,transcription factor activity, RNA polymerase II transcription factor binding,transcriptional activator activity, RNA polymerase II core promoter proximal region sequence-specific binding,RNA polyme…	gluconeogenesis,regulation of transcription, DNA-templated,transcription from RNA polymerase II promoter,cellular amino acid metabolic process,gamma-aminobutyric acid signaling pathway,positive regulation of vascular endothelial growth factor production,positive regulation of gene expression,negative regulation of translational initiation in response to stress,circadian regulation of gene express…
3.95729	9.88657e-08	5.54091e-07	Q6PEW1	ZCCHC12	Zinc finger CCHC domain-containing protein 12	2	nuclear speck	nucleic acid binding,protein binding,zinc ion binding,ligand-dependent nuclear receptor transcription coactivator activity	transcription, DNA-templated,BMP signaling pathway
3.94791	3.63278e-05	0.00011993	Q70SY1	CREB3L2	Cyclic AMP-responsive element-binding protein 3-like protein 2	2	nucleus,nucleoplasm,endoplasmic reticulum,endoplasmic reticulum membrane,integral component of membrane	transcriptional activator activity, RNA polymerase II core promoter proximal region sequence-specific binding,cAMP response element binding,transcription regulatory region DNA binding	chondrocyte differentiation,transcription from RNA polymerase II promoter,ER to Golgi vesicle-mediated transport,endoplasmic reticulum unfolded protein response,response to endoplasmic reticulum stress,positive regulation of transcription, DNA-templated,positive regulation of transcription from RNA polymerase II promoter,cartilage development
3.84134	0.105339	0.094937	P01859	IGHG2	Ig gamma-2 chain C region	3	extracellular region,extracellular space,external side of plasma membrane,immunoglobulin complex, circulating,extracellular exosome,blood microparticle	antigen binding,serine-type endopeptidase activity,protein binding,immunoglobulin receptor binding	proteolysis,phagocytosis, recognition,phagocytosis, engulfment,complement activation,complement activation, classical pathway,regulation of complement activation,Fc-gamma receptor signaling pathway involved in phagocytosis,defense response to bacterium,innate immune response,B cell receptor signaling pathway,positive regulation of B cell activation
3.80461	2.76324e-05	9.37598e-05	Q9H3Y8	PPDPF	Pancreatic progenitor cell differentiation and proliferation factor	3			cell fate specification,exocrine pancreas development
3.7717	6.28111e-10	4.99634e-09	P01106	MYC	Myc proto-oncogene protein	5	nuclear chromatin,nucleus,nucleoplasm,nucleolus,cytosol,protein complex	RNA polymerase II core promoter proximal region sequence-specific DNA binding,RNA polymerase II transcription factor activity, sequence-specific DNA binding,transcriptional activator activity, RNA polymerase II core promoter proximal region sequence-specific binding,DNA binding,transcription factor activity, sequence-specific DNA binding,protein binding,transcription factor binding,protein comple…	G1/S transition of mitotic cell cycle,negative regulation of transcription from RNA polymerase II promoter,MAPK cascade,branching involved in ureteric bud morphogenesis,positive regulation of mesenchymal cell proliferation,energy reserve metabolic process,chromatin remodeling,regulation of transcription from RNA polymerase II promoter,transcription from RNA polymerase II promoter,cellular iron io…
3.76521	3.81908e-11	3.52685e-10	Q16665	HIF1A	Hypoxia-inducible factor 1-alpha	5	nucleus,nucleoplasm,transcription factor complex,cytoplasm,cytosol,nuclear body,nuclear speck,motile cilium,protein complex,RNA polymerase II transcription factor complex,axon cytoplasm	RNA polymerase II transcription factor activity, sequence-specific DNA binding,transcription factor activity, transcription factor binding,transcription factor activity, RNA polymerase II transcription factor binding,transcriptional activator activity, RNA polymerase II core promoter proximal region sequence-specific binding,transcriptional activator activity, RNA polymerase II transcription regu…	angiogenesis,response to hypoxia,neural crest cell migration,epithelial to mesenchymal transition,embryonic placenta development,B-1 B cell homeostasis,positive regulation of endothelial cell proliferation,heart looping,positive regulation of neuroblast proliferation,connective tissue replacement involved in inflammatory response wound healing,outflow tract morphogenesis,cardiac ventricle morphog…
3.74367	1.65408e-11	1.60146e-10	Q6PJG6	BRAT1	BRCA1-associated ATM activator 1	7	nucleus,nucleoplasm,cytoplasm,membrane	protein binding	positive regulation of protein phosphorylation,glucose metabolic process,apoptotic process,cellular response to DNA damage stimulus,cell proliferation,response to ionizing radiation,cell migration,positive regulation of cell growth,mitochondrion localization
3.70871	0.00199549	0.00403246	O43889	CREB3	Cyclic AMP-responsive element-binding protein 3	1	Golgi membrane,nucleus,nucleoplasm,endoplasmic reticulum,endoplasmic reticulum membrane,cytosol,integral component of membrane	RNA polymerase II regulatory region sequence-specific DNA binding,RNA polymerase II core promoter proximal region sequence-specific DNA binding,transcription factor activity, RNA polymerase II core promoter proximal region sequence-specific binding,transcriptional activator activity, RNA polymerase II core promoter proximal region sequence-specific binding,protein binding,cAMP response element bi…	transcription from RNA polymerase II promoter,chemotaxis,positive regulation of transcription from RNA polymerase II promoter involved in unfolded protein response,viral process,endoplasmic reticulum unfolded protein response,positive regulation of transcription from RNA polymerase II promoter,positive regulation of monocyte chemotaxis,negative regulation of endoplasmic reticulum stress-induced i…
3.55182	7.90402e-06	3.08235e-05	P61599	NAA20	N-alpha-acetyltransferase 20	2	intracellular,nucleus,cytoplasm,cytosol,NatB complex	peptide alpha-N-acetyltransferase activity	N-terminal peptidyl-methionine acetylation
3.53515	1.4767e-12	1.65126e-11	P69849;Q15155;Q5JPE7	NOMO3;NOMO1;NOMO2	Nodal modulator 3;Nodal modulator 1;Nodal modulator 2	5	cellular_component,integral component of membrane;membrane,integral component of membrane;endoplasmic reticulum membrane,integral component of membrane	molecular_function,carbohydrate binding;molecular_function,carbohydrate binding;protein binding,carbohydrate binding	biological_process;biological_process;protein destabilization
3.40352	2.69086e-06	1.17139e-05	P09936	UCHL1	Ubiquitin carboxyl-terminal hydrolase isozyme L1	2	nucleoplasm,cytoplasm,endoplasmic reticulum membrane,cytosol,neuronal cell body,myelin sheath,neuron projection terminus,extracellular exosome,axon cytoplasm,plasma membrane	cysteine-type endopeptidase activity,thiol-dependent ubiquitin-specific protease activity,protein binding,omega peptidase activity,ligase activity,ubiquitin protein ligase binding,alpha-2A adrenergic receptor binding,thiol-dependent ubiquitinyl hydrolase activity,ubiquitin binding	response to ischemia,axon target recognition,adult walking behavior,cell proliferation,regulation of macroautophagy,protein deubiquitination,sensory perception of pain,axonal transport of mitochondrion,eating behavior,proteasome-mediated ubiquitin-dependent protein catabolic process,negative regulation of MAP kinase activity,muscle fiber development,neuromuscular process
3.20566	2.80181e-19	6.01616e-18	Q9UL46	PSME2	Proteasome activator complex subunit 2	12	proteasome complex,nucleoplasm,cytoplasm,cytosol,proteasome activator complex,membrane,extracellular exosome	protein binding,identical protein binding,endopeptidase activator activity	MAPK cascade,protein polyubiquitination,stimulatory C-type lectin receptor signaling pathway,antigen processing and presentation of exogenous peptide antigen via MHC class I, TAP-dependent,regulation of cellular amino acid metabolic process,positive regulation of endopeptidase activity,negative regulation of G2/M transition of mitotic cell cycle,protein deubiquitination,anaphase-promoting complex…
3.17052	6.90431e-05	0.000211603	P78395	PRAME	Melanoma antigen preferentially expressed in tumors	1	nucleus,plasma membrane	protein binding,retinoic acid receptor binding	transcription, DNA-templated,apoptotic process,positive regulation of cell proliferation,cell differentiation,regulation of growth,negative regulation of apoptotic process,negative regulation of cell differentiation,negative regulation of transcription, DNA-templated,negative regulation of retinoic acid receptor signaling pathway
3.15091	0.00301129	0.00570475	Q9BXL8	CDCA4	Cell division cycle-associated protein 4	1	nucleoplasm,cytosol,plasma membrane	protein binding
3.13455	2.78654e-11	2.62527e-10	O75563	SKAP2	Src kinase-associated phosphoprotein 2	6	nucleoplasm,cytoplasm,cytosol,plasma membrane	SH3/SH2 adaptor activity,protein binding	immune response-activating signal transduction,protein complex assembly,signal transduction,negative regulation of cell proliferation,positive regulation of signal transduction,B cell activation
3.06211	5.69082e-06	2.30932e-05	Q9P032	NDUFAF4	NADH dehydrogenase [ubiquinone] 1 alpha subcomplex assembly factor 4	2	mitochondrion,mitochondrial inner membrane,mitochondrial membrane	protein binding,calmodulin binding	mitochondrial respiratory chain complex I assembly
3.02875	0.000432192	0.00107549	O96000	NDUFB10	NADH dehydrogenase [ubiquinone] 1 beta subcomplex subunit 10	1	mitochondrial inner membrane,mitochondrial respiratory chain complex I,extracellular exosome	protein binding,NADH dehydrogenase (ubiquinone) activity	mitochondrial electron transport, NADH to ubiquinone,mitochondrial respiratory chain complex I assembly
2.922	1.99915e-07	1.0707e-06	Q9UGL1	KDM5B	Lysine-specific demethylase 5B	7	nucleus,nucleoplasm,cytosol	DNA binding,transcription factor activity, sequence-specific DNA binding,transcription corepressor activity,protein binding,zinc ion binding,histone demethylase activity,histone demethylase activity (H3-K4 specific),histone demethylase activity (H3-trimethyl-K4 specific),histone demethylase activity (H3-dimethyl-K4 specific),histone binding,dioxygenase activity,sequence-specific double-stranded D…	transcription, DNA-templated,regulation of transcription from RNA polymerase II promoter,single fertilization,post-embryonic development,positive regulation of gene expression,positive regulation of mammary gland epithelial cell proliferation,histone H3-K4 demethylation,histone H3-K4 demethylation, trimethyl-H3-K4-specific,cellular response to fibroblast growth factor stimulus,negative regulation…
2.89958	6.14819e-07	3.01805e-06	Q9H992	39142	E3 ubiquitin-protein ligase MARCH7	2		zinc ion binding,transferase activity	regulation of tolerance induction,protein ubiquitination,negative regulation of T cell proliferation
2.89153	0.0291553	0.0358488	Q9UHD9	UBQLN2	Ubiquilin-2	2	nucleus,cytoplasm,autophagosome,cytosol,plasma membrane,cytoplasmic vesicle	protein binding	autophagy,regulation of macroautophagy,ER-associated ubiquitin-dependent protein catabolic process,negative regulation of clathrin-dependent endocytosis,positive regulation of ER-associated ubiquitin-dependent protein catabolic process,negative regulation of G-protein coupled receptor internalization,regulation of autophagosome assembly
2.89049	0.632422	0.337348	P22694	PRKACB	cAMP-dependent protein kinase catalytic subunit beta	7	nucleoplasm,centrosome,cytosol,plasma membrane,cAMP-dependent protein kinase complex,intercellular bridge,perinuclear region of cytoplasm,extracellular exosome,ciliary base	magnesium ion binding,protein serine/threonine kinase activity,cAMP-dependent protein kinase activity,protein binding,ATP binding,kinase activity,ubiquitin protein ligase binding	neural tube closure,stimulatory C-type lectin receptor signaling pathway,renal water homeostasis,protein phosphorylation,signal transduction,adenylate cyclase-modulating G-protein coupled receptor signaling pathway,blood coagulation,activation of protein kinase A activity,high-density lipoprotein particle assembly,negative regulation of meiotic cell cycle,regulation of protein processing,cellular…
2.88073	2.33305e-07	1.2307e-06	Q13438	OS9	Protein OS-9	3	Hrd1p ubiquitin ligase complex,endoplasmic reticulum,endoplasmic reticulum lumen,endoplasmic reticulum membrane,endoplasmic reticulum quality control compartment	protease binding,protein binding,carbohydrate binding	protein targeting,protein retention in ER lumen,protein ubiquitination,ER-associated ubiquitin-dependent protein catabolic process,response to endoplasmic reticulum stress,protein ubiquitination involved in ubiquitin-dependent protein catabolic process,transmembrane transport,negative regulation of retrograde protein transport, ER to cytosol,endoplasmic reticulum mannose trimming
2.86694	3.50455e-05	0.000116265	Q96MH7	C5orf34	Uncharacterized protein C5orf34	6
2.78617	2.39319e-62	4.40851e-60	P46379	BAG6	Large proline-rich protein BAG6	32	nucleus,nucleoplasm,cytoplasm,cytosol,membrane,intracellular membrane-bounded organelle,extracellular exosome,BAT3 complex	receptor binding,protein binding,Hsp70 protein binding,polyubiquitin binding,ubiquitin protein ligase binding,ribosome binding,misfolded protein binding,proteasome binding,ubiquitin-specific protease binding	kidney development,immune response-activating cell surface receptor signaling pathway,ubiquitin-dependent protein catabolic process,apoptotic process,synaptonemal complex assembly,spermatogenesis,brain development,embryo development,proteasomal protein catabolic process,chromatin modification,internal peptidyl-lysine acetylation,natural killer cell activation,cell differentiation,lung development…
2.78245	0.253062	0.181028	Q9NUP1	BLOC1S4	Biogenesis of lysosome-related organelles complex 1 subunit 4	1	cytoplasm,cytosol,BLOC-1 complex,axon cytoplasm	protein binding	anterograde axonal transport,neuron projection development,melanosome organization,intracellular transport,anterograde synaptic vesicle transport,neuromuscular process controlling balance,platelet aggregation
2.78155	0.00157291	0.00329553	A8MXV4	NUDT19	Nucleoside diphosphate-linked moiety X motif 19	1	cellular_component,mitochondrion,peroxisomal matrix	receptor binding,metal ion binding,acyl-CoA hydrolase activity	biological_process,fatty acid catabolic process
2.78108	0.500239	0.289179	Q01469	FABP5	Fatty acid-binding protein, epidermal	4	extracellular region,nucleoplasm,cytoplasm,cytosol,plasma membrane,secretory granule membrane,azurophil granule lumen,extracellular exosome	fatty acid binding,protein binding,lipid binding	lipid metabolic process,epidermis development,triglyceride catabolic process,neutrophil degranulation
2.77786	0.345518	0.224512	P09211	GSTP1	Glutathione S-transferase P	1	extracellular region,extracellular space,intracellular,nucleus,cytoplasm,mitochondrion,cytosol,plasma membrane,vesicle,secretory granule lumen,extracellular exosome,TRAF2-GSTP1 complex,ficolin-1-rich granule lumen	glutathione transferase activity,glutathione peroxidase activity,protein binding,drug binding,JUN kinase binding,kinase regulator activity,S-nitrosoglutathione binding,dinitrosyl-iron complex binding,glutathione binding,nitric oxide binding	response to reactive oxygen species,negative regulation of acute inflammatory response,negative regulation of protein kinase activity,glutathione metabolic process,xenobiotic metabolic process,central nervous system development,negative regulation of biosynthetic process,negative regulation of tumor necrosis factor-mediated signaling pathway,oligodendrocyte development,animal organ regeneration,r…
2.74616	0.018026	0.0245252	Q3BBV0	NBPF1	Neuroblastoma breakpoint family member 1	2	cytoplasm
2.74462	3.24631e-11	3.02989e-10	P99999	CYCS	Cytochrome c	4	protein phosphatase type 2A complex,nucleus,mitochondrion,mitochondrial inner membrane,mitochondrial intermembrane space,cytosol,respiratory chain	protein binding,heme binding,electron transporter, transferring electrons from CoQH2-cytochrome c reductase complex and cytochrome c oxidase complex activity,metal ion binding,protein serine/threonine phosphatase activity	mitochondrial electron transport, ubiquinol to cytochrome c,mitochondrial electron transport, cytochrome c to oxygen,protein dephosphorylation,mitochondrion organization,activation of cysteine-type endopeptidase activity involved in apoptotic process by cytochrome c,cellular response to oxidative stress,cellular respiration,intrinsic apoptotic signaling pathway
2.67466	0.114247	0.101114	Q9UGL9	CRCT1	Cysteine-rich C-terminal protein 1	1		protein binding
2.67289	0.127985	0.110074	P48730	CSNK1D	Casein kinase I isoform delta	1	Golgi membrane,nucleus,nucleoplasm,Golgi apparatus,centrosome,spindle,cytosol,spindle microtubule,plasma membrane,endoplasmic reticulum-Golgi intermediate compartment membrane,neuron projection,perinuclear region of cytoplasm	protein kinase activity,protein serine/threonine kinase activity,protein binding,ATP binding,peptide binding,cadherin binding,tau-protein kinase activity	G2/M transition of mitotic cell cycle,positive regulation of protein phosphorylation,rRNA processing,protein phosphorylation,endocytosis,microtubule nucleation,Golgi organization,regulation of cell shape,regulation of G2/M transition of mitotic cell cycle,Wnt signaling pathway,peptidyl-serine phosphorylation,positive regulation of proteasomal ubiquitin-dependent protein catabolic process,circadia…
2.66971	0.00953624	0.0146358	Q9Y282	ERGIC3	Endoplasmic reticulum-Golgi intermediate compartment protein 3	1	endoplasmic reticulum membrane,Golgi apparatus,membrane,integral component of membrane,endoplasmic reticulum-Golgi intermediate compartment membrane		vesicle-mediated transport
2.65957	1.23654e-19	2.72194e-18	P63092;Q5JWF2	GNAS	Guanine nucleotide-binding protein G(s) subunit alpha isoforms short;Guanine nucleotide-binding protein G(s) subunit alpha isoforms XLas	12	;cytosol,heterotrimeric G-protein complex,membrane,apical plasma membrane,dendrite,extracellular exosome	;GTPase activity,signal transducer activity,insulin-like growth factor receptor binding,protein binding,GTP binding,G-protein beta/gamma-subunit complex binding,beta-2 adrenergic receptor binding,D1 dopamine receptor binding,mu-type opioid receptor binding,ionotropic glutamate receptor binding,metal ion binding,corticotropin-releasing hormone receptor 1 binding	;tissue homeostasis,endochondral ossification,energy reserve metabolic process,DNA methylation,adenylate cyclase-activating G-protein coupled receptor signaling pathway,adenylate cyclase-activating dopamine receptor signaling pathway,sensory perception of chemical stimulus,embryonic hindlimb morphogenesis,multicellular organism growth,post-embryonic body morphogenesis,response to drug,positive re…
2.64122	0.1275	0.109819	P61956	SUMO2	Small ubiquitin-related modifier 2	2	nucleus,nucleoplasm,PML body	transcription corepressor binding,RNA binding,protein binding,protein tag,ubiquitin protein ligase binding	protein sumoylation,positive regulation of proteasomal ubiquitin-dependent protein catabolic process,global genome nucleotide-excision repair
2.63522	0.908903	0.42424	A6ZKI3	FAM127A	Protein FAM127A	4
2.63056	0.0443706	0.0496094	Q96SK2	TMEM209	Transmembrane protein 209	4	integral component of membrane
2.62634	0.000209653	0.000568165	P30305	CDC25B	M-phase inducer phosphatase 2	6	spindle pole,nucleoplasm,centrosome,cytosol	phosphoprotein phosphatase activity,protein tyrosine phosphatase activity,protein binding,protein kinase binding	G2/M transition of mitotic cell cycle,mitotic cell cycle,oocyte maturation,protein phosphorylation,female meiosis I,positive regulation of cell proliferation,positive regulation of cytokinesis,peptidyl-tyrosine dephosphorylation,positive regulation of protein kinase activity,positive regulation of mitotic cell cycle,cell division,positive regulation of cell cycle G2/M phase transition
2.61371	4.24501e-12	4.46923e-11	Q9NZL4	HSPBP1	Hsp70-binding protein 1	4		enzyme inhibitor activity,protein binding	protein folding,positive regulation of protein ubiquitination,positive regulation of proteasomal ubiquitin-dependent protein catabolic process,negative regulation of catalytic activity
2.61299	0.00396863	0.00717841	P21673	SAT1	Diamine acetyltransferase 1	1	intracellular,cytosol	diamine N-acetyltransferase activity,protein binding,spermidine binding,identical protein binding	angiogenesis,polyamine biosynthetic process,putrescine catabolic process,spermidine acetylation,regulation of cell proliferation,spermine catabolic process
2.60483	0.000223367	0.00060068	Q9BRG1	VPS25	Vacuolar protein-sorting-associated protein 25	2	ESCRT II complex,nucleus,nucleoplasm,cytoplasm,cytosol,endosome membrane,extracellular exosome	structural molecule activity,protein binding,protein homodimerization activity,protein N-terminus binding	transcription, DNA-templated,regulation of transcription, DNA-templated,negative regulation of epidermal growth factor-activated receptor activity,endosomal transport,macroautophagy,multivesicular body assembly,protein targeting to vacuole involved in ubiquitin-dependent protein catabolic process via the multivesicular body sorting pathway
2.6044	0.000548025	0.00132328	Q9NWX5	ASB6	Ankyrin repeat and SOCS box protein 6	3	cytosol	protein binding	protein ubiquitination,intracellular signal transduction,post-translational protein modification
2.59318	3.25636e-07	1.66993e-06	P04632	CAPNS1	Calpain small subunit 1	2	cytosol,plasma membrane,membrane,extracellular exosome	endopeptidase activity,calcium-dependent cysteine-type endopeptidase activity,calcium ion binding,protein binding	proteolysis,positive regulation of cell proliferation,regulation of macroautophagy,extracellular matrix disassembly,cornification
2.58777	1.23191e-08	7.992e-08	P05412	JUN	Transcription factor AP-1	6	nuclear chromosome,nucleus,nucleoplasm,nuclear euchromatin,cytosol,transcriptional repressor complex,transcription factor AP-1 complex	RNA polymerase II core promoter proximal region sequence-specific DNA binding,RNA polymerase II distal enhancer sequence-specific DNA binding,RNA polymerase II transcription factor activity, sequence-specific DNA binding,transcription factor activity, RNA polymerase II core promoter proximal region sequence-specific binding,transcriptional activator activity, RNA polymerase II core promoter proxi…	angiogenesis,microglial cell activation,release of cytochrome c from mitochondria,liver development,positive regulation of endothelial cell proliferation,outflow tract morphogenesis,transcription from RNA polymerase II promoter,transforming growth factor beta receptor signaling pathway,Ras protein signal transduction,aging,learning,circadian rhythm,negative regulation of cell proliferation,respon…
2.58696	0.0216497	0.0283532	P63220	RPS21	40S ribosomal protein S21	2	nucleoplasm,cytosol,small ribosomal subunit,cytosolic small ribosomal subunit	RNA binding,structural constituent of ribosome,protein N-terminus binding	nuclear-transcribed mRNA catabolic process, nonsense-mediated decay,endonucleolytic cleavage in ITS1 to separate SSU-rRNA from 5.8S rRNA and LSU-rRNA from tricistronic rRNA transcript (SSU-rRNA, 5.8S rRNA, LSU-rRNA),endonucleolytic cleavage to generate mature 3'-end of SSU-rRNA from (SSU-rRNA, 5.8S rRNA, LSU-rRNA),rRNA processing,translation,translational initiation,SRP-dependent cotranslational …
2.52435	0.000179471	0.000494023	Q9NX09	DDIT4	DNA damage-inducible transcript 4 protein	2	intracellular,cytoplasm,mitochondrion,cytosol	14-3-3 protein binding	response to hypoxia,neuron migration,brain development,cell proliferation,negative regulation of peptidyl-threonine phosphorylation,neuron differentiation,negative regulation of TOR signaling,negative regulation of peptidyl-serine phosphorylation,intrinsic apoptotic signaling pathway in response to DNA damage by p53 class mediator,protein complex disassembly,negative regulation of glycolytic proc…
2.49949	0.000571373	0.00137255	Q14494	NFE2L1	Nuclear factor erythroid 2-related factor 1	5	nucleus,cytoplasm,endoplasmic reticulum membrane,cytosol,integral component of membrane,protein complex	transcription regulatory region sequence-specific DNA binding,RNA polymerase II distal enhancer sequence-specific DNA binding,transcriptional activator activity, RNA polymerase II transcription factor binding,transcriptional activator activity, RNA polymerase II distal enhancer sequence-specific binding,transcription factor activity, sequence-specific DNA binding,transcription cofactor activity,p…	regulation of transcription from RNA polymerase II promoter,transcription from RNA polymerase II promoter,heme biosynthetic process,inflammatory response,anatomical structure morphogenesis,erythrocyte differentiation,cellular response to oxidative stress,positive regulation of transcription, DNA-templated,positive regulation of transcription from RNA polymerase II promoter
2.49648	0.000858841	0.00195699	P50616	TOB1	Protein Tob1	3	nucleus,cytoplasm,CCR4-NOT complex	transcription corepressor activity,SH3/SH2 adaptor activity,protein binding,receptor tyrosine kinase binding,SMAD binding	SMAD protein import into nucleus,negative regulation of cell proliferation,positive regulation of signal transduction,negative regulation of translation,BMP signaling pathway,negative regulation of BMP signaling pathway,negative regulation of osteoblast differentiation,negative regulation of nuclear-transcribed mRNA poly(A) tail shortening,positive regulation of nuclear-transcribed mRNA poly(A) t…
2.44635	1.25564e-09	9.47146e-09	Q96M94	KLHL15	Kelch-like protein 15	10	nucleus,Cul3-RING ubiquitin ligase complex	protein binding,ubiquitin-protein transferase activity	protein ubiquitination involved in ubiquitin-dependent protein catabolic process,nucleus-associated proteasomal ubiquitin-dependent protein catabolic process,negative regulation of double-strand break repair via homologous recombination
2.4129	0.0119945	0.0176724	Q9UDV7	ZNF282	Zinc finger protein 282	1	nucleus	DNA binding,zinc ion binding	transcription, DNA-templated,regulation of transcription, DNA-templated,negative regulation of transcription, DNA-templated
2.41203	0.000461142	0.00113702	P14324	FDPS	Farnesyl pyrophosphate synthase	1	nucleoplasm,cytoplasm,mitochondrion,cytosol	RNA binding,dimethylallyltranstransferase activity,geranyltranstransferase activity,metal ion binding	cholesterol biosynthetic process,viral process,geranyl diphosphate biosynthetic process,farnesyl diphosphate biosynthetic process,regulation of cholesterol biosynthetic process
2.39875	1.31651e-07	7.24494e-07	P04075	ALDOA	Fructose-bisphosphate aldolase A	5	extracellular region,extracellular space,nucleus,cytosol,actin cytoskeleton,membrane,platelet alpha granule lumen,M band,I band,secretory granule lumen,Requires Ontology,extracellular exosome,tertiary granule lumen,ficolin-1-rich granule lumen	RNA binding,actin binding,fructose-bisphosphate aldolase activity,protein binding,cytoskeletal protein binding,tubulin binding,identical protein binding,cadherin binding,fructose binding	platelet degranulation,fructose metabolic process,gluconeogenesis,glycolytic process,ATP biosynthetic process,striated muscle contraction,actin filament organization,binding of sperm to zona pellucida,regulation of cell shape,fructose 1,6-bisphosphate metabolic process,neutrophil degranulation,muscle cell cellular homeostasis,protein homotetramerization,canonical glycolysis
2.39577	0.235646	0.171736	P31947	SFN	14-3-3 protein sigma	6	extracellular space,nucleus,mitochondrion,cytosol,cytoplasmic vesicle membrane,extracellular exosome	protein binding,protein kinase C inhibitor activity,protein kinase binding,protein domain specific binding,identical protein binding,cadherin binding,phosphoprotein binding	regulation of cyclin-dependent protein serine/threonine kinase activity,release of cytochrome c from mitochondria,keratinocyte development,negative regulation of protein kinase activity,DNA damage response, signal transduction by p53 class mediator resulting in cell cycle arrest,signal transduction,intrinsic apoptotic signaling pathway in response to DNA damage,regulation of epidermal cell divisi…
2.39207	3.38468e-25	1.08186e-23	P11441	UBL4A	Ubiquitin-like protein 4A	8	nucleus,nucleoplasm,cytoplasm,cytosol,membrane,BAT3 complex	protein binding,ubiquitin-like protein transferase activity,chaperone binding	cellular protein modification process,tail-anchored membrane protein insertion into ER membrane
2.38737	5.05726e-05	0.000160548	P51149	RAB7A	Ras-related protein Rab-7a	3	autophagosome membrane,lysosome,lysosomal membrane,late endosome,Golgi apparatus,lipid particle,cytosol,plasma membrane,endosome membrane,secretory granule membrane,phagocytic vesicle membrane,late endosome membrane,extrinsic component of lysosome membrane,melanosome membrane,pre-autophagosomal structure membrane,terminal bouton,phagocytic vesicle,extracellular exosome,alveolar lamellar body,retr…	GTPase activity,protein binding,GTP binding,GDP binding,Rac GTPase binding,retromer complex binding	autophagosome assembly,protein targeting to lysosome,endocytosis,epidermal growth factor catabolic process,endosome to lysosome transport,protein transport,lipid catabolic process,viral release from host cell,antigen processing and presentation of exogenous peptide antigen via MHC class II,protein to membrane docking,retrograde transport, endosome to Golgi,neutrophil degranulation,early endosome …
2.37217	3.7298e-06	1.58138e-05	P35613	BSG	Basigin	5	Golgi membrane,acrosomal membrane,mitochondrion,plasma membrane,integral component of plasma membrane,focal adhesion,membrane,sarcolemma,melanosome,intracellular membrane-bounded organelle,membrane raft,extracellular exosome	protein binding,mannose binding,monocarboxylic acid transmembrane transporter activity,cadherin binding	pyruvate metabolic process,cell surface receptor signaling pathway,embryo implantation,monocarboxylic acid transport,extracellular matrix disassembly,extracellular matrix organization,odontogenesis of dentin-containing tooth,response to peptide hormone,response to mercury ion,decidualization,leukocyte migration,response to cAMP,protein localization to plasma membrane
2.3575	0.025513	0.0322716	Q15363	TMED2	Transmembrane emp24 domain-containing protein 2	1	Golgi membrane,endoplasmic reticulum,endoplasmic reticulum membrane,endoplasmic reticulum-Golgi intermediate compartment,Golgi apparatus,ER to Golgi transport vesicle membrane,integral component of membrane,transport vesicle,COPI-coated vesicle,COPI-coated vesicle membrane,Golgi cisterna membrane,endoplasmic reticulum-Golgi intermediate compartment membrane,zymogen granule membrane,intracellular …	protein binding	neural tube closure,maternal placenta development,heart looping,intracellular protein transport,ER to Golgi vesicle-mediated transport,retrograde vesicle-mediated transport, Golgi to ER,Golgi organization,positive regulation of gene expression,somite rostral/caudal axis specification,negative regulation of GTPase activity,multicellular organism growth,cargo loading into vesicle,post-anal tail mor…
2.3399	0.0039816	0.00719257	Q9Y4A8	NFE2L3	Nuclear factor erythroid 2-related factor 3	1	nucleus,cytoplasm	transcription regulatory region sequence-specific DNA binding,RNA polymerase II core promoter proximal region sequence-specific DNA binding,transcriptional repressor activity, RNA polymerase II core promoter proximal region sequence-specific binding,transcription factor activity, sequence-specific DNA binding,transcription coactivator activity,protein binding	negative regulation of transcription from RNA polymerase II promoter,regulation of transcription from RNA polymerase II promoter,transcription from RNA polymerase II promoter,positive regulation of transcription, DNA-templated
2.30692	0.0124621	0.0182174	Q14249	ENDOG	Endonuclease G, mitochondrial	1	nucleus,mitochondrion,cytosol,perikaryon	nucleic acid binding,endonuclease activity,deoxyribonuclease activity,protein binding,metal ion binding	in utero embryonic development,apoptotic DNA fragmentation,DNA recombination,aging,response to mechanical stimulus,response to estradiol,response to tumor necrosis factor,neuron death in response to oxidative stress,response to antibiotic,cellular response to calcium ion,cellular response to glucose stimulus,cellular response to hypoxia,positive regulation of hydrogen peroxide-mediated programmed…
2.30282	0.0161669	0.0224808	Q8TEL6	TRPC4AP	Short transient receptor potential channel 4-associated protein	1	plasma membrane,Cul4A-RING E3 ubiquitin ligase complex	calcium channel activity,protein binding,phosphatase binding	ubiquitin-dependent protein catabolic process,protein ubiquitination,hair follicle maturation,calcium ion transmembrane transport
2.28933	0.0255193	0.0322735	Q6NXE6	ARMC6	Armadillo repeat-containing protein 6	2	cytosol		hematopoietic progenitor cell differentiation
2.26023	0.0119112	0.0175867	Q8IUC4	RHPN2	Rhophilin-2	2	cytosol,perinuclear region of cytoplasm		signal transduction
2.25639	0.022952	0.0296757	Q13569	TDG	G/T mismatch-specific thymine DNA glycosylase	1	nucleus,nucleoplasm,plasma membrane,PML body	magnesium ion binding,RNA polymerase II transcription cofactor activity,DNA binding,damaged DNA binding,double-stranded DNA binding,uracil DNA N-glycosylase activity,protein kinase C binding,protein binding,ATP binding,transcription factor binding,pyrimidine-specific mismatch base pair DNA N-glycosylase activity,DNA N-glycosylase activity,protein domain specific binding,mismatched DNA binding,sod…	negative regulation of transcription from RNA polymerase II promoter,base-excision repair,base-excision repair, AP site formation,mismatch repair,transcription, DNA-templated,embryo development,chromatin modification,negative regulation of protein binding,oxidative DNA demethylation,negative regulation of chromatin binding,regulation of gene expression, epigenetic,depyrimidination,DNA demethylati…
2.25434	3.40505e-17	6.01902e-16	Q9Y4R8	TELO2	Telomere length regulation protein TEL2 homolog	12	chromosome, telomeric region,intracellular,nucleus,cytoplasm,cytosol,membrane,nuclear body,TORC1 complex,TORC2 complex,nuclear periphery	protein binding,protein kinase binding,protein complex binding,protein complex scaffold,Hsp90 protein binding	regulation of TOR signaling,protein stabilization,positive regulation of protein serine/threonine kinase activity,positive regulation of TORC1 signaling,positive regulation of TORC2 signaling
2.25343	0.00440147	0.00780204	P98182	ZNF200	Zinc finger protein 200	2	nucleus	molecular_function,nucleic acid binding,metal ion binding	transcription, DNA-templated,regulation of transcription, DNA-templated,biological_process
2.25311	0.00036909	0.000936776	Q06945	SOX4	Transcription factor SOX-4	2	nucleus,nucleoplasm,cytoplasm,mitochondrion,nuclear transcription factor complex	transcription regulatory region sequence-specific DNA binding,core promoter sequence-specific DNA binding,transcriptional activator activity, RNA polymerase II core promoter proximal region sequence-specific binding,RNA polymerase II transcription coactivator activity,transcription factor activity, sequence-specific DNA binding,protein binding,protein heterodimerization activity	skeletal system development,neural tube formation,pro-B cell differentiation,mitral valve morphogenesis,cardiac ventricle formation,cardiac right ventricle morphogenesis,atrial septum primum morphogenesis,noradrenergic neuron differentiation,regulation of transcription, DNA-templated,transcription from RNA polymerase II promoter,DNA damage response, signal transduction by p53 class mediator resul…
2.22742	2.44066e-05	8.39951e-05	Q13889	GTF2H3	General transcription factor IIH subunit 3	4	core TFIIH complex portion of holo TFIIH complex,nucleus,nucleoplasm,transcription factor TFIID complex,holo TFIIH complex,transcriptional preinitiation complex	damaged DNA binding,transcription factor activity, sequence-specific DNA binding,protein binding,translation factor activity, RNA binding,metal ion binding,protein N-terminus binding,protein kinase activity,DNA-dependent ATPase activity,RNA polymerase II carboxy-terminal domain kinase activity	nucleotide-excision repair, DNA duplex unwinding,DNA repair,transcription-coupled nucleotide-excision repair,nucleotide-excision repair,nucleotide-excision repair, preincision complex stabilization,nucleotide-excision repair, preincision complex assembly,nucleotide-excision repair, DNA incision, 3'-to lesion,nucleotide-excision repair, DNA incision, 5'-to lesion,transcription initiation from RNA …
2.21613	0.196048	0.150426	Q9Y6X2	PIAS3	E3 SUMO-protein ligase PIAS3	1	nucleoplasm,cytoplasm,nuclear speck,dendrite,synapse	protein binding,protein C-terminus binding,zinc ion binding,potassium channel regulator activity,ligase activity,SUMO transferase activity,enzyme binding,protein N-terminus binding	transcription, DNA-templated,regulation of transcription, DNA-templated,response to hormone,positive regulation of gene expression,protein sumoylation,negative regulation of protein sumoylation,positive regulation of protein sumoylation,positive regulation of membrane potential,regulation of molecular function
2.21009	2.70443e-15	4.00232e-14	Q9H211	CDT1	DNA replication factor Cdt1	9	condensed chromosome kinetochore,nucleus,nucleoplasm,cytoplasm,cytosol,nuclear body,kinetochore	DNA binding,chromatin binding,protein binding	DNA replication checkpoint,G1/S transition of mitotic cell cycle,regulation of transcription involved in G1/S transition of mitotic cell cycle,mitotic cell cycle,chromosome segregation,regulation of DNA-dependent DNA replication initiation,positive regulation of protein complex assembly,regulation of chromosome organization,regulation of nuclear cell cycle DNA replication,positive regulation of c…
2.15965	0.221105	0.164007	O14879	IFIT3	Interferon-induced protein with tetratricopeptide repeats 3	1	cytoplasm,mitochondrion,cytosol	molecular_function,protein binding,identical protein binding	negative regulation of cell proliferation,response to virus,cellular response to interferon-alpha,negative regulation of apoptotic process,defense response to virus,type I interferon signaling pathway
2.15736	1.81389e-17	3.35019e-16	Q9NX31	OSER1	Oxidative stress-responsive serine-rich protein 1	7
2.13237	8.51777e-16	1.31621e-14	Q15773	MLF2	Myeloid leukemia factor 2	5	nucleus,cytoplasm,membrane	protein binding	defense response
2.12421	0.0697266	0.0696768	Q14094	CCNI	Cyclin-I	1			spermatogenesis,regulation of cell cycle
2.11851	0.131191	0.112174	P13995	MTHFD2	Bifunctional methylenetetrahydrofolate dehydrogenase/cyclohydrolase, mitochondrial	1	extracellular space,mitochondrion,mitochondrial matrix,cytosol	magnesium ion binding,methenyltetrahydrofolate cyclohydrolase activity,methylenetetrahydrofolate dehydrogenase (NAD+) activity,methylenetetrahydrofolate dehydrogenase (NADP+) activity,phosphate ion binding	one-carbon metabolic process,tetrahydrofolate metabolic process,folic acid metabolic process,oxidation-reduction process
2.0875	2.59533e-10	2.15508e-09	Q5VV67	PPRC1	Peroxisome proliferator-activated receptor gamma coactivator-related protein 1	10	nucleus,nucleoplasm	RNA polymerase II transcription cofactor activity,RNA binding,transcription factor binding,ligand-dependent nuclear receptor transcription coactivator activity	transcription, DNA-templated,mitochondrion organization,positive regulation of transcription from RNA polymerase II promoter,positive regulation of sequence-specific DNA binding transcription factor activity
2.07915	0.00262587	0.00508326	P40926	MDH2	Malate dehydrogenase, mitochondrial	1	nucleus,mitochondrion,mitochondrial inner membrane,mitochondrial matrix,myelin sheath,extracellular exosome	RNA binding,L-malate dehydrogenase activity,protein self-association,malate dehydrogenase (NADP+) activity	gluconeogenesis,tricarboxylic acid cycle,oxaloacetate metabolic process,malate metabolic process,internal protein amino acid acetylation,NADH metabolic process,aerobic respiration
2.06488	0.344419	0.224036	Q9NZD2	GLTP	Glycolipid transfer protein	1	cytosol,membrane,extracellular exosome	protein binding,lipid binding,glycolipid transporter activity,identical protein binding,glycolipid binding,Requires Ontology	glycosphingolipid metabolic process,glycolipid transport,Requires Ontology
2.06431	0.00116501	0.00254766	Q53EQ6	TIGD5	Tigger transposable element-derived protein 5	3	cellular_component,nucleus	molecular_function,DNA binding	biological_process
2.05692	0.0035323	0.00651715	Q8IXQ3	C9orf40	Uncharacterized protein C9orf40	1
2.02532	5.1041e-07	2.54297e-06	Q8IWA4	MFN1	Mitofusin-1	4	mitochondrion,mitochondrial outer membrane,integral component of membrane,integral component of mitochondrial outer membrane,outer mitochondrial membrane protein complex	GTPase activity,protein binding,GTP binding	mitochondrial fusion,macroautophagy,GTP metabolic process,mitochondrion localization,mitochondrial membrane fusion
2.01888	3.77289e-38	2.58924e-36	P61289	PSME3	Proteasome activator complex subunit 3	18	proteasome complex,nucleus,nucleoplasm,cytoplasm,cytosol,proteasome activator complex,membrane	p53 binding,protein binding,identical protein binding,endopeptidase activator activity,MDM2/MDM4 family protein binding	MAPK cascade,protein polyubiquitination,stimulatory C-type lectin receptor signaling pathway,antigen processing and presentation of exogenous peptide antigen via MHC class I, TAP-dependent,regulation of cellular amino acid metabolic process,apoptotic process,positive regulation of endopeptidase activity,negative regulation of G2/M transition of mitotic cell cycle,protein deubiquitination,anaphase…
1.99143	0.000117995	0.000341026	P0CG47;P0CG48;P62979;P62987	UBB;UBC;RPS27A;UBA52	Polyubiquitin-B;Polyubiquitin-C;Ubiquitin-40S ribosomal protein S27a;Ubiquitin-60S ribosomal protein L40	5	extracellular space,nucleus,nucleoplasm,mitochondrion,mitochondrial outer membrane,endoplasmic reticulum membrane,cytosol,plasma membrane,endosome membrane,endocytic vesicle membrane,vesicle,neuron projection,neuronal cell body,myelin sheath,host cell,endoplasmic reticulum quality control compartment,extracellular exosome;extracellular space,nucleus,nucleoplasm,mitochondrial outer membrane,endopl…	protein binding;protease binding,RNA binding,protein binding;RNA binding,structural constituent of ribosome,protein binding,metal ion binding;structural constituent of ribosome,protein binding	G2/M transition of mitotic cell cycle,negative regulation of transcription from RNA polymerase II promoter,MAPK cascade,activation of MAPK activity,protein polyubiquitination,nucleotide-excision repair, DNA damage recognition,nucleotide-excision repair, DNA duplex unwinding,stimulatory C-type lectin receptor signaling pathway,MyD88-dependent toll-like receptor signaling pathway,MyD88-independent …
1.98937	0.00134866	0.00287736	Q9P2L0	WDR35	WD repeat-containing protein 35	6	centrosome,cilium,axoneme,intraciliary transport particle A,ciliary basal body,ciliary tip	phosphatidylinositol binding	response to toxic substance,negative regulation of gene expression,response to lipopolysaccharide,intraciliary retrograde transport,intraciliary transport involved in cilium morphogenesis,positive regulation of cysteine-type endopeptidase activity involved in apoptotic process,negative regulation of nitric oxide biosynthetic process,cilium morphogenesis,protein localization to cilium,cellular res…
1.98236	0.0374505	0.0435398	P35638	DDIT3	DNA damage-inducible transcript 3 protein	1	nucleus,nucleoplasm,late endosome,cytosol,protein-DNA complex,CHOP-C/EBP complex,CHOP-ATF4 complex,CHOP-ATF3 complex,transcription factor AP-1 complex	transcription regulatory region sequence-specific DNA binding,RNA polymerase II core promoter proximal region sequence-specific DNA binding,transcriptional activator activity, RNA polymerase II core promoter proximal region sequence-specific binding,DNA binding,transcription factor activity, sequence-specific DNA binding,transcription corepressor activity,protein binding,transcription factor bind…	negative regulation of transcription from RNA polymerase II promoter,blood vessel maturation,regulation of transcription, DNA-templated,cellular response to DNA damage stimulus,ER overload response,response to unfolded protein,cell cycle arrest,Wnt signaling pathway,positive regulation of interleukin-8 production,negative regulation of CREB transcription factor activity,response to endoplasmic re…
1.98007	3.59196e-08	2.16756e-07	P55268	LAMB2	Laminin subunit beta-2	5	extracellular region,basement membrane,basal lamina,laminin-3 complex,endoplasmic reticulum lumen,extracellular matrix,synaptic cleft,laminin-11 complex,extracellular exosome	integrin binding,structural molecule activity	cell adhesion,axon guidance,neuromuscular junction development,visual perception,astrocyte development,Schwann cell development,extracellular matrix organization,post-translational protein modification,cellular protein metabolic process,axon extension involved in regeneration,retina development in camera-type eye,metanephric glomerular visceral epithelial cell development,metanephric glomerular b…
1.97245	0.0145289	0.0206335	P78543	BTG2	Protein BTG2	1	cytosol,extracellular exosome	transcriptional repressor activity, RNA polymerase II core promoter proximal region sequence-specific binding,protein binding	negative regulation of transcription from RNA polymerase II promoter,DNA repair,transcription, DNA-templated,protein methylation,cellular response to DNA damage stimulus,DNA damage response, signal transduction by p53 class mediator resulting in cell cycle arrest,negative regulation of cell proliferation,associative learning,response to mechanical stimulus,anterior/posterior pattern specification…
1.95774	3.52703e-27	1.27264e-25	Q06323	PSME1	Proteasome activator complex subunit 1	13	proteasome complex,nucleoplasm,cytoplasm,cytosol,proteasome activator complex,extracellular exosome	protein binding,endopeptidase activator activity	MAPK cascade,protein polyubiquitination,stimulatory C-type lectin receptor signaling pathway,antigen processing and presentation of exogenous peptide antigen via MHC class I, TAP-dependent,regulation of cellular amino acid metabolic process,positive regulation of endopeptidase activity,negative regulation of G2/M transition of mitotic cell cycle,protein deubiquitination,anaphase-promoting complex…
1.94109	0.0298873	0.036537	Q53HC5	KLHL26	Kelch-like protein 26	1	cytoplasm,Cul3-RING ubiquitin ligase complex	ubiquitin-protein transferase activity	spermatid development,male gonad development,fertilization,protein ubiquitination
1.9373	0.000149188	0.000421266	Q86V86	PIM3	Serine/threonine-protein kinase pim-3	2	cytoplasm,cytosol	protein serine/threonine kinase activity,protein binding,ATP binding	protein phosphorylation,apoptotic process,cell cycle,regulation of mitotic cell cycle,negative regulation of apoptotic process,protein autophosphorylation,negative regulation of insulin secretion involved in cellular response to glucose stimulus
1.92827	1.12672e-06	5.27208e-06	Q96JG8	MAGED4	Melanoma-associated antigen D4	7
1.92645	0.0517864	0.0558043	Q6TFL4	KLHL24	Kelch-like protein 24	1	cytoplasm,adherens junction,desmosome,axon,Cul3-RING ubiquitin ligase complex,perikaryon	protein binding,ubiquitin-protein transferase activity	protein ubiquitination,intermediate filament organization,protein autoubiquitination,regulation of kainate selective glutamate receptor activity
1.92153	3.80966e-06	1.61134e-05	Q14534	SQLE	Squalene monooxygenase	2	endoplasmic reticulum,endoplasmic reticulum membrane,integral component of membrane,organelle membrane	squalene monooxygenase activity,flavin adenine dinucleotide binding	cholesterol biosynthetic process,cellular aromatic compound metabolic process,cholesterol metabolic process,response to organic substance,sterol biosynthetic process,regulation of cholesterol biosynthetic process,oxidation-reduction process
1.9192	0.0125197	0.018277	Q8TAT5	NEIL3	Endonuclease 8-like 3	4	nucleus,nucleoplasm	bubble DNA binding,damaged DNA binding,double-stranded DNA binding,single-stranded DNA binding,DNA-(apurinic or apyrimidinic site) lyase activity,zinc ion binding,DNA N-glycosylase activity,Requires Ontology	base-excision repair,nucleotide-excision repair
1.91911	0.00265053	0.00512675	Q9NW38	FANCL	E3 ubiquitin-protein ligase FANCL	2	nuclear envelope,nucleoplasm,cytoplasm,nuclear body,intracellular membrane-bounded organelle,Fanconi anaemia nuclear complex	ubiquitin-protein transferase activity,protein binding,ubiquitin protein ligase binding,metal ion binding,ubiquitin protein ligase activity	DNA repair,protein monoubiquitination,cellular response to DNA damage stimulus,gamete generation,interstrand cross-link repair,regulation of cell proliferation
1.91514	0.0846258	0.0807608	Q9Y241	HIGD1A	HIG1 domain family member 1A, mitochondrial	2	nucleoplasm,mitochondrion,mitochondrial inner membrane,integral component of membrane,protein complex,respiratory chain		negative regulation of apoptotic process,oxidation-reduction process,regulation of transcription from RNA polymerase II promoter in response to hypoxia
1.91224	6.60349e-06	2.63387e-05	O95864	FADS2	Fatty acid desaturase 2	5	endoplasmic reticulum membrane,integral component of plasma membrane,membrane	stearoyl-CoA 9-desaturase activity,linoleoyl-CoA desaturase activity	unsaturated fatty acid biosynthetic process,alpha-linolenic acid metabolic process,linoleic acid metabolic process,oxidation-reduction process
1.90945	0.061662	0.0634943	Q9Y2V2	CARHSP1	Calcium-regulated heat stable protein 1	1	cytoplasmic mRNA processing body,cytoplasm,cytosol,P granule,extracellular exosome,cytoplasmic exosome (RNase complex)	DNA binding,mRNA 3'-UTR binding,protein binding,phosphatase binding	regulation of transcription, DNA-templated,intracellular signal transduction,regulation of mRNA stability
1.90841	3.81264e-40	2.9987e-38	Q9UNF1	MAGED2	Melanoma-associated antigen D2	28	extracellular region,nucleus,nucleolus,cytosol,membrane,platelet alpha granule lumen	protein binding	platelet degranulation,female pregnancy,renal sodium ion absorption
1.9062	0.171212	0.13661	P57086	SCAND1	SCAN domain-containing protein 1	1	nucleus	transcription factor activity, sequence-specific DNA binding,transcription coactivator activity,protein binding,identical protein binding	regulation of transcription, DNA-templated
1.90307	1.61089e-53	2.05023e-51	P54296	MYOM2	Myomesin-2	42	mitochondrion,muscle myosin complex,Z disc,M band,myosin filament	protein binding,structural constituent of muscle,kinase binding,actin filament binding,muscle alpha-actinin binding,structural molecule activity conferring elasticity	extraocular skeletal muscle development,muscle contraction,striated muscle contraction,actin filament organization,sarcomere organization,striated muscle myosin thick filament assembly
1.8988	4.49886e-23	1.24474e-21	Q03933	HSF2	Heat shock factor protein 2	11	nucleoplasm,cytoplasm	RNA polymerase II regulatory region sequence-specific DNA binding,RNA polymerase II core promoter proximal region sequence-specific DNA binding,RNA polymerase II intronic transcription regulatory region sequence-specific DNA binding,transcriptional activator activity, RNA polymerase II transcription regulatory region sequence-specific binding,transcription factor activity, sequence-specific DNA b…	transcription from RNA polymerase II promoter,spermatogenesis,positive regulation of transcription from RNA polymerase II promoter
1.89286	0.00917172	0.0141601	P40925	MDH1	Malate dehydrogenase, cytoplasmic	2	extracellular space,mitochondrion,cytosol,myelin sheath,extracellular exosome	malic enzyme activity,protein binding,L-malate dehydrogenase activity,diiodophenylpyruvate reductase activity,NAD binding	gluconeogenesis,tricarboxylic acid cycle,oxaloacetate metabolic process,malate metabolic process,NADH metabolic process
1.86758	0.00666084	0.0109605	Q53GT1	KLHL22	Kelch-like protein 22	1	cytoplasm,centrosome,polar microtubule,cytosol,Cul3-RING ubiquitin ligase complex,mitotic spindle	protein binding,ubiquitin-protein transferase activity	mitotic sister chromatid segregation,protein monoubiquitination,mitotic spindle assembly checkpoint,post-translational protein modification,cell division
1.8534	0.00417327	0.00746751	Q15904	ATP6AP1	V-type proton ATPase subunit S1	2	endoplasmic reticulum membrane,endosome membrane,integral component of membrane,proton-transporting two-sector ATPase complex,endoplasmic reticulum-Golgi intermediate compartment membrane,proton-transporting V-type ATPase, V1 domain,extracellular exosome	transporter activity,ATP binding,Rab GTPase binding,proton-transporting ATP synthase activity, rotational mechanism,proton-transporting ATPase activity, rotational mechanism	cellular iron ion homeostasis,insulin receptor signaling pathway,ATP hydrolysis coupled proton transport,proton transport,transferrin transport,ion transmembrane transport,cellular response to increased oxygen levels,positive regulation of osteoblast differentiation,positive regulation of bone resorption,pH reduction,positive regulation of exocytosis,establishment of organelle localization,positi…
1.85312	0.0711519	0.0707282	P61966	AP1S1	AP-1 complex subunit sigma-1A	1	Golgi membrane,lysosomal membrane,Golgi apparatus,cytosol,clathrin-coated pit,membrane,AP-1 adaptor complex,cytoplasmic vesicle membrane,clathrin-coated endocytic vesicle membrane,trans-Golgi network membrane,terminal bouton,intracellular membrane-bounded organelle,extracellular exosome	protein transporter activity	intracellular protein transport,receptor-mediated endocytosis,response to virus,antigen processing and presentation of exogenous peptide antigen via MHC class II,retrograde transport, endosome to Golgi,regulation of defense response to virus by virus
1.85067	0.00696793	0.0113791	P20908	COL5A1	Collagen alpha-1(V) chain	1	extracellular region,collagen type V trimer,basement membrane,endoplasmic reticulum lumen,extracellular matrix,extracellular exosome	integrin binding,extracellular matrix structural constituent,protein binding,heparin binding,proteoglycan binding,metal ion binding,platelet-derived growth factor binding	blood vessel development,heart morphogenesis,cell adhesion,cell migration,extracellular matrix organization,collagen fibril organization,collagen catabolic process,collagen biosynthetic process,wound healing, spreading of epidermal cells,tendon development,skin development,integrin biosynthetic process,eye morphogenesis,regulation of cellular component organization,fibril organization,negative re…
1.84399	0.0198259	0.0264647	Q14691	GINS1	DNA replication complex GINS protein PSF1	1	GINS complex,nucleus,nucleoplasm,cytoplasm	3'-5' DNA helicase activity	inner cell mass cell proliferation,DNA strand elongation involved in DNA replication,DNA duplex unwinding,DNA strand elongation involved in mitotic DNA replication
1.84313	0.00075378	0.00174659	Q8WUF8	FAM172A	Protein FAM172A	4	extracellular region,endoplasmic reticulum
1.83502	0.00301369	0.00570775	Q9BXT5	TEX15	Testis-expressed sequence 15 protein	1	nucleus,cytoplasm		DNA repair,synaptonemal complex assembly,male meiosis,spermatogenesis,fertilization,regulation of double-strand break repair via homologous recombination,cell differentiation,male genitalia development,regulation of protein localization,protein localization to chromosome,homeostasis of number of cells within a tissue
1.83393	4.0342e-12	4.25934e-11	O14727	APAF1	Apoptotic protease-activating factor 1	11	extracellular region,nucleus,cytosol,secretory granule lumen,protein complex,apoptosome,extracellular exosome,ficolin-1-rich granule lumen	nucleotide binding,protein binding,ATP binding,cysteine-type endopeptidase activator activity involved in apoptotic process,heat shock protein binding,identical protein binding,ADP binding	response to hypoxia,neural tube closure,apoptotic process,activation of cysteine-type endopeptidase activity involved in apoptotic process,nervous system development,aging,response to nutrient,activation of cysteine-type endopeptidase activity involved in apoptotic process by cytochrome c,cardiac muscle cell apoptotic process,cell differentiation,forebrain development,glial cell apoptotic process…
1.83347	1.26815e-08	8.19061e-08	Q14CX7	NAA25	N-alpha-acetyltransferase 25, NatB auxiliary subunit	10	Golgi apparatus,cytosol,NatB complex	peptide alpha-N-acetyltransferase activity	N-terminal peptidyl-methionine acetylation
1.82663	3.31766e-05	0.00011068	Q8IZC4	RTKN2	Rhotekin-2	3			signal transduction,hemopoiesis
1.82442	0.0573075	0.0602252	Q14118	DAG1	Dystroglycan	1	extracellular region,basement membrane,extracellular space,nucleoplasm,cytoplasm,endoplasmic reticulum lumen,Golgi lumen,cytosol,cytoskeleton,plasma membrane,cell-cell adherens junction,focal adhesion,external side of plasma membrane,dystrophin-associated glycoprotein complex,dystroglycan complex,integral component of membrane,basolateral plasma membrane,lamellipodium,filopodium,extracellular mat…	virus receptor activity,dystroglycan binding,actin binding,calcium ion binding,protein binding,structural constituent of muscle,tubulin binding,vinculin binding,SH2 domain binding,laminin-1 binding,alpha-actinin binding	positive regulation of cell-matrix adhesion,morphogenesis of an epithelial sheet,protein O-linked glycosylation,membrane protein ectodomain proteolysis,NLS-bearing protein import into nucleus,cytoskeletal anchoring at plasma membrane,aging,regulation of gastrulation,regulation of epithelial to mesenchymal transition,response to denervation involved in regulation of muscle adaptation,calcium-depen…
1.80835	4.37462e-05	0.000141117	P48200	IREB2	Iron-responsive element-binding protein 2	7	cytoplasm,cytosol	RNA binding,protein binding,iron-responsive element binding,translation repressor activity,metal ion binding,4 iron, 4 sulfur cluster binding	iron ion transport,cellular iron ion homeostasis,metabolic process,negative regulation of translation
1.80555	0.0147556	0.0209173	Q8WV44	TRIM41	E3 ubiquitin-protein ligase TRIM41	1	nucleolus,cytoplasm,nuclear body	protein binding,zinc ion binding,transferase activity,identical protein binding	protein ubiquitination
1.80417	3.48196e-06	1.48984e-05	O00767	SCD	Acyl-CoA desaturase	4	nucleolus,endoplasmic reticulum,endoplasmic reticulum membrane,membrane,integral component of membrane	stearoyl-CoA 9-desaturase activity,iron ion binding,oxidoreductase activity	unsaturated fatty acid biosynthetic process,regulation of cholesterol biosynthetic process,fatty-acyl-CoA biosynthetic process,oxidation-reduction process,monounsaturated fatty acid biosynthetic process
1.80311	0.454565	0.271452	Q96JB3	HIC2	Hypermethylated in cancer 2 protein	1	nucleus	DNA binding,protein C-terminus binding,metal ion binding	transcription, DNA-templated,negative regulation of transcription, DNA-templated
1.80151	3.43054e-09	2.41587e-08	O75496	GMNN	Geminin	7	nucleus,nucleoplasm,cytoplasm,cytosol	chromatin binding,transcription corepressor activity,protein binding,histone deacetylase binding,repressing transcription factor binding	protein complex assembly,negative regulation of DNA replication,animal organ morphogenesis,positive regulation of chromatin binding,negative regulation of cell cycle,negative regulation of transcription, DNA-templated,DNA replication preinitiation complex assembly,negative regulation of DNA-dependent DNA replication
1.78276	0.00417133	0.00746751	Q86YN6	PPARGC1B	Peroxisome proliferator-activated receptor gamma coactivator 1-beta	4	nucleus,nucleoplasm,mitochondrion,mediator complex	RNA polymerase II transcription cofactor activity,RNA binding,transcription factor binding,estrogen receptor binding,ligand-dependent nuclear receptor transcription coactivator activity,AF-2 domain binding	ossification,regulation of transcription, DNA-templated,transcription from mitochondrial promoter,actin filament organization,positive regulation of alkaline phosphatase activity,intracellular estrogen receptor signaling pathway,cellular response to reactive oxygen species,positive regulation of phosphorylation,positive regulation of osteoclast differentiation,positive regulation of bone resorpti…
1.7798	0.000775907	0.00179016	P62937	PPIA	Peptidyl-prolyl cis-trans isomerase A	7	extracellular region,extracellular space,nucleus,cytosol,focal adhesion,membrane,vesicle,secretory granule lumen,extracellular exosome,ficolin-1-rich granule lumen	RNA binding,peptidyl-prolyl cis-trans isomerase activity,protein binding,cyclosporin A binding,virion binding,unfolded protein binding	protein peptidyl-prolyl isomerization,RNA-dependent DNA biosynthetic process,protein folding,viral life cycle,uncoating of virus,fusion of virus membrane with host plasma membrane,virion assembly,viral release from host cell,entry into host cell,lipid particle organization,interleukin-12-mediated signaling pathway,neutrophil degranulation,regulation of viral genome replication,positive regulation…
1.77832	9.04751e-12	9.08646e-11	P00558	PGK1	Phosphoglycerate kinase 1	8	extracellular space,cytosol,membrane,membrane raft,extracellular exosome	phosphoglycerate kinase activity,protein binding,ATP binding,protein-disulfide reductase activity	gluconeogenesis,glycolytic process,phosphorylation,negative regulation of angiogenesis,epithelial cell differentiation,plasminogen activation,canonical glycolysis,cellular response to hypoxia
1.76576	0.000382276	0.000965692	Q96MT3	PRICKLE1	Prickle-like protein 1	4	nucleus,cytosol,nuclear membrane	protein binding,zinc ion binding	neural tube closure,protein import into nucleus,positive regulation of protein ubiquitination,positive regulation of proteasomal ubiquitin-dependent protein catabolic process,aorta development,negative regulation of transcription, DNA-templated,Wnt signaling pathway, planar cell polarity pathway,coronary vasculature development,negative regulation of canonical Wnt signaling pathway,negative regul…
1.76371	0.0041618	0.00745269	Q9H2G4	TSPYL2	Testis-specific Y-encoded-like protein 2	2	nucleus,nucleoplasm,nucleolus,cytoplasm	rDNA binding,protein binding	nucleosome assembly,transcription, DNA-templated,regulation of transcription, DNA-templated,cell cycle,negative regulation of DNA replication,regulation of signal transduction,chromatin modification,negative regulation of cell growth,IRE1-mediated unfolded protein response,negative regulation of cell cycle,regulation of protein kinase activity
1.76323	0.000727832	0.00169545	P59780	AP3S2	AP-3 complex subunit sigma-2	2	Golgi apparatus,AP-3 adaptor complex,cytoplasmic vesicle membrane,intracellular membrane-bounded organelle,axon cytoplasm	protein transporter activity	intracellular protein transport,anterograde axonal transport,anterograde synaptic vesicle transport
1.76231	0.000120482	0.000347067	Q9H4I3	TRABD	TraB domain-containing protein	5
1.75827	0.000525116	0.00127544	A6NED2	RCCD1	RCC1 domain-containing protein 1	2	chromosome,cytosol,plasma membrane		chromatin modification
1.74016	0.0353317	0.0416087	P09972	ALDOC	Fructose-bisphosphate aldolase C	1	extracellular region,mitochondrion,cytosol,cytoskeleton,secretory granule lumen,extracellular exosome,tertiary granule lumen,ficolin-1-rich granule lumen	fructose-bisphosphate aldolase activity,protein binding,cytoskeletal protein binding	fructose metabolic process,gluconeogenesis,fructose 1,6-bisphosphate metabolic process,epithelial cell differentiation,neutrophil degranulation,canonical glycolysis
1.73861	0.0495914	0.0539288	P11047	LAMC1	Laminin subunit gamma-1	3	extracellular region,basement membrane,laminin-1 complex,extracellular space,endoplasmic reticulum lumen,extracellular matrix,laminin-10 complex,laminin-11 complex,extracellular exosome	extracellular matrix structural constituent	protein complex assembly,cell adhesion,endoderm development,cell migration,extracellular matrix disassembly,extracellular matrix organization,hemidesmosome assembly,substrate adhesion-dependent cell spreading,post-translational protein modification,cellular protein metabolic process,positive regulation of epithelial cell proliferation
1.72585	0.00214192	0.0042863	Q9NVR0	KLHL11	Kelch-like protein 11	3	nucleus,cytoplasm,cytosol,SCF ubiquitin ligase complex	ubiquitin protein ligase binding	regulation of proteolysis,protein ubiquitination involved in ubiquitin-dependent protein catabolic process,proteasome-mediated ubiquitin-dependent protein catabolic process,post-translational protein modification
1.72437	1.60344e-11	1.55458e-10	Q16659	MAPK6	Mitogen-activated protein kinase 6	16	nucleus,nucleoplasm,cytoplasm,cytosol,septin cytoskeleton,protein complex	protein serine/threonine kinase activity,MAP kinase activity,protein binding,ATP binding,protein kinase binding,protein heterodimerization activity	MAPK cascade,protein phosphorylation,cell cycle,signal transduction,regulation of gene expression,positive regulation of dendritic spine development,cellular response to organic substance
1.72251	0.00523241	0.00900144	O60942	RNGTT	mRNA-capping enzyme	2	nucleus,nucleoplasm	mRNA guanylyltransferase activity,polynucleotide 5'-phosphatase activity,protein tyrosine phosphatase activity,protein binding,GTP binding,protein tyrosine/serine/threonine phosphatase activity,RNA guanylyltransferase activity,triphosphatase activity	transcription from RNA polymerase II promoter,7-methylguanosine mRNA capping,RNA processing,viral process,peptidyl-tyrosine dephosphorylation,polynucleotide 5' dephosphorylation
1.71234	0.000328144	0.000844488	Q7L7V1	DHX32	Putative pre-mRNA-splicing factor ATP-dependent RNA helicase DHX32	2	spliceosomal complex,cytoplasm,mitochondrion	RNA binding,ATP-dependent RNA helicase activity,protein binding,ATP binding	mRNA splicing, via spliceosome
1.70922	0.0237568	0.0305041	Q7L311	ARMCX2	Armadillo repeat-containing X-linked protein 2	1	mitochondrial outer membrane,integral component of membrane
1.70162	1.69913e-05	6.08696e-05	A8MTY0	ZNF724P	Putative zinc finger protein 724	4	nucleus	DNA binding,metal ion binding	transcription, DNA-templated,regulation of transcription, DNA-templated
1.68749	0.00400733	0.00723345	P40424	PBX1	Pre-B-cell leukemia transcription factor 1	3	nucleus,nucleoplasm,cytoplasm,RNA polymerase II transcription factor complex	RNA polymerase II core promoter proximal region sequence-specific DNA binding,transcriptional activator activity, RNA polymerase II core promoter proximal region sequence-specific binding,DNA binding,transcription factor activity, sequence-specific DNA binding,protein binding,protein heterodimerization activity,RNA polymerase II regulatory region sequence-specific DNA binding	branching involved in ureteric bud morphogenesis,transcription from RNA polymerase II promoter,steroid biosynthetic process,sex differentiation,positive regulation of cell proliferation,anterior/posterior pattern specification,proximal/distal pattern formation,positive regulation of G2/M transition of mitotic cell cycle,regulation of ossification,adrenal gland development,embryonic limb morphogen…
1.68556	0.000148747	0.000420188	Q53T94	TAF1B	TATA box-binding protein-associated factor RNA polymerase I subunit B	4	nucleus,nucleoplasm,RNA polymerase transcription factor SL1 complex,extracellular exosome,RNA polymerase I core factor complex	RNA polymerase I CORE element sequence-specific DNA binding,transcription factor activity, RNA polymerase I CORE element binding transcription factor recruiting,transcription factor activity, sequence-specific DNA binding,protein binding,TBP-class protein binding,metal ion binding	RNA polymerase I transcriptional preinitiation complex assembly at the promoter for the nuclear large rRNA transcript,transcription, DNA-templated,regulation of transcription, DNA-templated,transcription initiation from RNA polymerase I promoter,transcription elongation from RNA polymerase I promoter,termination of RNA polymerase I transcription,positive regulation of gene expression, epigenetic
1.67269	0.0814393	0.0784471	Q8N1G1	REXO1	RNA exonuclease 1 homolog	1	nucleoplasm,nuclear body	nucleic acid binding,exonuclease activity	nucleic acid phosphodiester bond hydrolysis
1.66393	7.59727e-18	1.44907e-16	O00311	CDC7	Cell division cycle 7-related protein kinase	14	nucleus,nucleoplasm,cytoplasm,intercellular bridge,mitotic spindle	protein kinase activity,protein serine/threonine kinase activity,protein binding,ATP binding,kinase activity,metal ion binding	G1/S transition of mitotic cell cycle,double-strand break repair via break-induced replication,DNA replication,DNA replication initiation,phagocytosis,positive regulation of cell proliferation,regulation of cell shape,positive regulation of nuclear cell cycle DNA replication,positive regulation of G2/M transition of mitotic cell cycle,peptidyl-serine phosphorylation,cell cycle phase transition,ce…
1.66277	5.53193e-07	2.74052e-06	P42771	CDKN2A	Cyclin-dependent kinase inhibitor 2A	3	nucleus,cytoplasm,cytosol,senescence-associated heterochromatin focus	RNA binding,cyclin-dependent protein serine/threonine kinase inhibitor activity,protein binding,protein kinase binding,NF-kappaB binding	G1/S transition of mitotic cell cycle,negative regulation of cell-matrix adhesion,cell cycle arrest,Ras protein signal transduction,negative regulation of cell proliferation,negative regulation of cell growth,negative regulation of NF-kappaB transcription factor activity,positive regulation of smooth muscle cell apoptotic process,senescence-associated heterochromatin focus assembly,negative regul…
1.6575	0.0637857	0.0650495	Q96F45	ZNF503	Zinc finger protein 503	6	nucleus	nucleic acid binding,metal ion binding	transcription, DNA-templated,regulation of transcription, DNA-templated,negative regulation of cell proliferation,negative regulation of gene expression,neural precursor cell proliferation,G1 to G0 transition involved in cell differentiation
1.65465	3.4793e-05	0.000115646	Q9BWF2	TRAIP	E3 ubiquitin-protein ligase TRAIP	2	nucleolus,perinuclear region of cytoplasm	receptor signaling protein activity,protein binding,metal ion binding,ubiquitin protein ligase activity	apoptotic process,signal transduction,cell proliferation,negative regulation of tumor necrosis factor-mediated signaling pathway,protein ubiquitination,negative regulation of interferon-beta production
1.63861	0.0298364	0.0364939	Q9H5I1	SUV39H2	Histone-lysine N-methyltransferase SUV39H2	3	chromosome, centromeric region,chromatin,nucleoplasm	transcription regulatory region sequence-specific DNA binding,protein binding,zinc ion binding,histone-lysine N-methyltransferase activity,histone methyltransferase activity (H3-K9 specific),S-adenosyl-L-methionine binding	negative regulation of transcription from RNA polymerase II promoter,chromatin assembly or disassembly,chromatin remodeling,transcription, DNA-templated,cell cycle,cell differentiation,histone H3-K9 dimethylation,histone H3-K9 trimethylation,negative regulation of circadian rhythm,negative regulation of transcription, DNA-templated,rhythmic process,cellular response to hypoxia
1.63011	0.00238385	0.00468048	Q6PCD5	RFWD3	E3 ubiquitin-protein ligase RFWD3	1	nucleus,nucleoplasm,cytoplasm,PML body,Requires Ontology,site of double-strand break	p53 binding,ubiquitin-protein transferase activity,protein binding,metal ion binding,MDM2/MDM4 family protein binding	double-strand break repair via homologous recombination,cellular response to DNA damage stimulus,response to ionizing radiation,protein ubiquitination,replication fork processing,mitotic G1 DNA damage checkpoint,interstrand cross-link repair,regulation of DNA damage checkpoint
1.62932	0.00193679	0.0039377	O95149	SNUPN	Snurportin-1	1	nuclear pore,cytosol,extracellular exosome	RNA cap binding,protein binding,protein transporter activity	spliceosomal snRNP assembly,protein import into nucleus,nuclear import,snRNA import into nucleus
1.62304	0.127295	0.109704	P31151	S100A7	Protein S100-A7	5	extracellular region,extracellular space,nucleus,cytoplasm,endoplasmic reticulum,cytosol,focal adhesion,extracellular matrix,azurophil granule lumen,extracellular exosome	calcium ion binding,protein binding,zinc ion binding,RAGE receptor binding	response to reactive oxygen species,angiogenesis,epidermis development,positive regulation of T cell chemotaxis,antimicrobial humoral response,keratinocyte differentiation,response to lipopolysaccharide,neutrophil degranulation,innate immune response,defense response to Gram-negative bacterium,sequestering of metal ion,Requires Ontology,positive regulation of ERK1 and ERK2 cascade,positive regula…
1.62184	2.03612e-05	7.17303e-05	Q9H0U9	TSPYL1	Testis-specific Y-encoded-like protein 1	2	nucleus,nucleolus	enzyme binding	nucleosome assembly,biological_process
1.61159	0.00840762	0.0132653	Q9BQC3	DPH2	Diphthamide biosynthesis protein 2	1	cytosol	protein binding,2-(3-amino-3-carboxypropyl)histidine synthase activity	peptidyl-diphthamide biosynthetic process from peptidyl-histidine
1.60862	0.00727025	0.011775	Q9Y3B8	REXO2	Oligoribonuclease, mitochondrial	2	nucleus,nucleolus,mitochondrion,mitochondrial intermembrane space,mitochondrial matrix,focal adhesion	3'-5'-exoribonuclease activity,nucleic acid binding,3'-5' exonuclease activity	nucleobase-containing compound metabolic process,nucleotide metabolic process,RNA phosphodiester bond hydrolysis, exonucleolytic
1.60532	0.0157466	0.0220277	Q9BUN5	CCDC28B	Coiled-coil domain-containing protein 28B	1	cytoplasm,centrosome	protein binding	cilium morphogenesis
1.60512	0.000269511	0.000710306	Q96NU1	SAMD11	Sterile alpha motif domain-containing protein 11	2	nucleus
1.5979	0.954603	0.437029	O15155	BET1	BET1 homolog	1	Golgi membrane,endoplasmic reticulum membrane,cis-Golgi network,membrane,integral component of membrane,transport vesicle,SNARE complex,Golgi cisterna,endoplasmic reticulum-Golgi intermediate compartment membrane	protein binding,syntaxin binding	ER to Golgi vesicle-mediated transport,protein transport,COPII vesicle coating,vesicle fusion with Golgi apparatus
1.59602	0.048724	0.0532732	Q68CQ4	DIEXF	Digestive organ expansion factor homolog	1	nucleoplasm,nucleolus,small-subunit processome	RNA binding,protein binding,rRNA binding,U3 snoRNA binding	maturation of SSU-rRNA from tricistronic rRNA transcript (SSU-rRNA, 5.8S rRNA, LSU-rRNA),rRNA processing,multicellular organism development
1.59002	0.0150718	0.0213051	P09914;Q5T764	IFIT1;IFIT1B	Interferon-induced protein with tetratricopeptide repeats 1;Interferon-induced protein with tetratricopeptide repeats 1B	1	cytoplasm,cytosol,host cell;	RNA binding,protein binding;protein binding	response to virus,viral process,intracellular transport of viral protein in host cell,negative regulation of protein binding,positive regulation of viral genome replication,negative regulation of viral genome replication,negative regulation of defense response to virus by host,negative regulation of helicase activity,defense response to virus,type I interferon signaling pathway,cellular response …
1.58943	0.1686	0.134895	Q8IXN7	RIMKLA	N-acetylaspartylglutamate synthase A	3	cytoplasm,cytosol	ATP binding,metal ion binding,N-acetyl-L-aspartate-L-glutamate ligase activity	cellular protein modification process,cellular amino acid biosynthetic process
1.58484	0.0267227	0.0334691	P07737	PFN1	Profilin-1	2	nucleus,cytoplasm,cytosol,cytoskeleton,focal adhesion,cell cortex,membrane,extracellular exosome,blood microparticle	adenyl-nucleotide exchange factor activity,RNA binding,actin binding,actin monomer binding,protein binding,phosphatidylinositol-4,5-bisphosphate binding,Rho GTPase binding,cadherin binding,proline-rich region binding	neural tube closure,regulation of transcription from RNA polymerase II promoter,positive regulation of epithelial cell migration,actin cytoskeleton organization,negative regulation of actin filament polymerization,positive regulation of actin filament polymerization,negative regulation of actin filament bundle assembly,positive regulation of actin filament bundle assembly,positive regulation of A…
1.58023	0.0498267	0.0540811	Q9H4F8	SMOC1	SPARC-related modular calcium-binding protein 1	1	basement membrane	calcium ion binding,protein binding,extracellular matrix binding	eye development,signal transduction,cell differentiation,regulation of osteoblast differentiation,limb development
1.56817	1.00506e-05	3.81116e-05	Q9BQ70	TCF25	Transcription factor 25	2	nucleus	DNA binding,transcription factor activity, sequence-specific DNA binding,protein binding	negative regulation of transcription from RNA polymerase II promoter,transcription, DNA-templated,heart development
1.55959	1.61418e-09	1.19823e-08	Q15345	LRRC41	Leucine-rich repeat-containing protein 41	3	nucleus,cytoplasm,cytosol,membrane	protein homodimerization activity	protein ubiquitination,post-translational protein modification
1.55656	0.0924631	0.0860693	Q9BYD6	MRPL1	39S ribosomal protein L1, mitochondrial	2	mitochondrion,mitochondrial inner membrane,box H/ACA snoRNP complex,cytosolic large ribosomal subunit	RNA binding,structural constituent of ribosome,protein binding,box H/ACA snoRNA binding	cleavage involved in rRNA processing,maturation of LSU-rRNA,translation,rRNA pseudouridine synthesis,snRNA pseudouridine synthesis,mitochondrial translational elongation,mitochondrial translational termination
1.55246	0.000320426	0.000827859	Q8NG27	PJA1	E3 ubiquitin-protein ligase Praja-1	2	cytoplasm	protein binding,metal ion binding,ubiquitin protein ligase activity	protein ubiquitination,protein catabolic process
1.5475	0.00336212	0.00625262	Q9BZG8	DPH1	Diphthamide biosynthesis protein 1	1	nucleoplasm,cytosol,cell junction	protein binding,transferase activity	cell proliferation,peptidyl-diphthamide biosynthetic process from peptidyl-histidine
1.5444	0.000322213	0.000831364	Q149N8	SHPRH	E3 ubiquitin-protein ligase SHPRH	4	nucleosome,nucleoplasm	DNA binding,helicase activity,ubiquitin-protein transferase activity,protein binding,ATP binding,ubiquitin protein ligase binding,metal ion binding,ubiquitin protein ligase activity	protein polyubiquitination,DNA repair,nucleosome assembly,cellular response to DNA damage stimulus,protein ubiquitination
1.53787	0.000672332	0.00158569	Q9NX74	DUS2	tRNA-dihydrouridine(20) synthase [NAD(P)+]-like	3	mitochondrion,endoplasmic reticulum,cytosol	double-stranded RNA binding,protein kinase inhibitor activity,protein binding,tRNA dihydrouridine synthase activity,flavin adenine dinucleotide binding	tRNA dihydrouridine synthesis,negative regulation of protein kinase activity,oxidation-reduction process,negative regulation of cell death
1.53623	0.00179736	0.00369718	Q5T8A7	PPP1R26	Protein phosphatase 1 regulatory subunit 26	3	nucleolus	protein phosphatase inhibitor activity,protein binding	negative regulation of phosphatase activity,negative regulation of phosphoprotein phosphatase activity
1.53485	0.639769	0.339683	Q9BRK5	SDF4	45 kDa calcium-binding protein	3	cytoplasm,late endosome,Golgi apparatus,Golgi lumen,membrane,bleb,extracellular exosome,plasma membrane	calcium ion binding,identical protein binding	UV protection,calcium ion regulated exocytosis,cerebellum development,fat cell differentiation,response to ethanol,zymogen granule exocytosis
1.53128	0.0269962	0.0337211	Q96C34	RUNDC1	RUN domain-containing protein 1	3	intracellular,endomembrane system	GTPase activator activity,Rab GTPase binding	intracellular protein transport,regulation of vesicle fusion,activation of GTPase activity
1.5273	0.267653	0.188456	P23284	PPIB	Peptidyl-prolyl cis-trans isomerase B	2	nucleus,endoplasmic reticulum,endoplasmic reticulum lumen,smooth endoplasmic reticulum,focal adhesion,membrane,macromolecular complex,endoplasmic reticulum chaperone complex,melanosome,perinuclear region of cytoplasm,extracellular exosome	RNA binding,peptidyl-prolyl cis-trans isomerase activity,protein binding,protein complex binding,unfolded protein binding,RNA polymerase binding,collagen binding	protein peptidyl-prolyl isomerization,positive regulation of multicellular organism growth,positive regulation by host of viral process,positive regulation by host of viral genome replication,protein stabilization,bone development,chaperone-mediated protein folding,regulation of post-translational protein modification
1.52716	0.153052	0.125847	Q8WVB6	CHTF18	Chromosome transmission fidelity protein 18 homolog	2	nucleoplasm,cytosol,membrane,Ctf18 RFC-like complex	protein binding,ATP binding,DNA clamp loader activity,single-stranded DNA-dependent ATPase activity	DNA replication,cell cycle,positive regulation of DNA-directed DNA polymerase activity
1.5173	0.0012097	0.00263061	Q5TAQ9	DCAF8	DDB1- and CUL4-associated factor 8	2	nucleus,nucleoplasm,cytoplasm,mitochondrion,cytosol,Cul4-RING E3 ubiquitin ligase complex	protein binding	protein ubiquitination,post-translational protein modification
1.51166	0.00216294	0.0043197	O43502	RAD51C	DNA repair protein RAD51 homolog 3	7	nucleus,nucleoplasm,replication fork,cytoplasm,mitochondrion,cytosol,cell junction,Rad51B-Rad51C-Rad51D-XRCC2 complex,Rad51C-XRCC3 complex,intracellular membrane-bounded organelle,perinuclear region of cytoplasm,Holliday junction resolvase complex	recombinase activity,DNA binding,double-stranded DNA binding,single-stranded DNA binding,protein binding,ATP binding,DNA-dependent ATPase activity,four-way junction DNA binding,crossover junction endodeoxyribonuclease activity	meiotic DNA recombinase assembly,telomere maintenance via recombination,double-strand break repair via homologous recombination,DNA synthesis involved in DNA repair,strand displacement,DNA repair,DNA recombination,mitotic recombination,sister chromatid cohesion,female meiosis sister chromatid cohesion,reciprocal meiotic recombination,male meiosis I,spermatogenesis,blood coagulation,response to io…
1.51131	0.0055324	0.00940427	Q86YD1	PTOV1	Prostate tumor-overexpressed gene 1 protein	3	nucleus,plasma membrane,perinuclear region of cytoplasm		transcription, DNA-templated,regulation of transcription, DNA-templated
1.50986	4.86137e-15	7.04546e-14	P62841	RPS15	40S ribosomal protein S15	3	nucleus,nucleoplasm,cytosol,focal adhesion,membrane,cytosolic small ribosomal subunit	DNA binding,RNA binding,structural constituent of ribosome,protein binding	ribosomal small subunit assembly,ribosomal small subunit export from nucleus,nuclear-transcribed mRNA catabolic process, nonsense-mediated decay,osteoblast differentiation,rRNA processing,translation,translational initiation,SRP-dependent cotranslational protein targeting to membrane,viral transcription,ribosomal small subunit biogenesis
1.50956	4.29932e-06	1.79459e-05	Q9UBT6	POLK	DNA polymerase kappa	6	nucleoplasm,nuclear body,Requires Ontology	damaged DNA binding,DNA-directed DNA polymerase activity,metal ion binding	DNA replication,DNA repair,transcription-coupled nucleotide-excision repair,nucleotide-excision repair, DNA incision, 5'-to lesion,nucleotide-excision repair, DNA gap filling,cellular response to DNA damage stimulus,translesion synthesis,nucleotide-excision repair, DNA incision,cellular response to UV,error-prone translesion synthesis
1.50623	0.0555357	0.0587679	Q96BU1	S100PBP	S100P-binding protein	4	nucleus,cytosol,nuclear speck	calcium-dependent protein binding
1.50007	2.17756e-07	1.16004e-06	Q9BXC9	BBS2	Bardet-Biedl syndrome 2 protein	6	cytosol,microvillus,membrane,motile cilium,stereocilium,BBSome,ciliary basal body,ciliary membrane	RNA polymerase II repressing transcription factor binding,protein binding	sperm axoneme assembly,visual perception,protein localization,negative regulation of gene expression,artery smooth muscle contraction,striatum development,hippocampus development,cerebral cortex development,adult behavior,melanosome transport,protein localization to organelle,negative regulation of appetite by leptin-mediated signaling pathway,negative regulation of multicellular organism growth,…
1.49986	0.196646	0.150752	P48594	SERPINB4	Serpin B4	8	extracellular space,intracellular,cytoplasm,extracellular exosome	protease binding,serine-type endopeptidase inhibitor activity,enzyme binding	negative regulation of peptidase activity,negative regulation of endopeptidase activity,regulation of proteolysis,protection from natural killer cell mediated cytotoxicity
1.4949	4.76167e-10	3.84005e-09	Q9BSV6	TSEN34	tRNA-splicing endonuclease subunit Sen34	4	tRNA-intron endonuclease complex,nucleus,nucleoplasm,nucleolus	tRNA-intron endonuclease activity,lyase activity	tRNA-type intron splice site recognition and cleavage,tRNA splicing, via endonucleolytic cleavage and ligation,mRNA processing,RNA phosphodiester bond hydrolysis, endonucleolytic
1.49462	0.00222971	0.00443283	Q9UN79	SOX13	Transcription factor SOX-13	2	nucleus,nucleoplasm	RNA polymerase II regulatory region sequence-specific DNA binding,transcription factor activity, sequence-specific DNA binding,protein binding,sequence-specific DNA binding	transcription, DNA-templated,regulation of transcription, DNA-templated,anatomical structure morphogenesis,regulation of gamma-delta T cell differentiation
1.49089	0.418376	0.256672	Q6GQQ9	OTUD7B	OTU domain-containing protein 7B	4	nucleus,cytoplasm,cytosol	DNA binding,thiol-dependent ubiquitin-specific protease activity,protein binding,cysteine-type peptidase activity,zinc ion binding,thiol-dependent ubiquitinyl hydrolase activity,K63-linked polyubiquitin binding,Lys48-specific deubiquitinase activity	negative regulation of transcription from RNA polymerase II promoter,adaptive immune response,mucosal immune response,immune response,protein deubiquitination,negative regulation of interleukin-8 production,protein K11-linked deubiquitination,negative regulation of I-kappaB kinase/NF-kappaB signaling,protein K63-linked deubiquitination,protein K48-linked deubiquitination,protein deubiquitination …
1.48991	1.61986e-05	5.82086e-05	P41162	ETV3	ETS translocation variant 3	2	nuclear chromatin,nucleus,RNA polymerase II transcription repressor complex	RNA polymerase II regulatory region sequence-specific DNA binding,RNA polymerase II transcription factor activity, sequence-specific DNA binding,transcriptional repressor activity, RNA polymerase II transcription regulatory region sequence-specific binding,molecular_function,DEAD/H-box RNA helicase binding	negative regulation of transcription from RNA polymerase II promoter,transcription, DNA-templated,regulation of transcription from RNA polymerase II promoter,biological_process,negative regulation of cell proliferation,cell differentiation,cellular response to granulocyte macrophage colony-stimulating factor stimulus
1.48955	0.00383902	0.00698004	Q93075	TATDN2	Putative deoxyribonuclease TATDN2	2	nucleus,nucleoplasm,cytosol,nuclear speck	deoxyribonuclease activity,endodeoxyribonuclease activity, producing 5'-phosphomonoesters,metal ion binding	DNA catabolic process,IRE1-mediated unfolded protein response,nucleic acid phosphodiester bond hydrolysis
1.48766	0.00611298	0.0102004	P04083	ANXA1	Annexin A1	5	cornified envelope,phagocytic cup,extracellular region,extracellular space,nucleus,nucleoplasm,cytoplasm,endosome,cytosol,plasma membrane,cell-cell adherens junction,focal adhesion,cell surface,basolateral plasma membrane,apical plasma membrane,lateral plasma membrane,extrinsic component of membrane,cytoplasmic vesicle membrane,extrinsic component of external side of plasma membrane,extrinsic com…	single-stranded DNA binding,single-stranded RNA binding,helicase activity,receptor binding,structural molecule activity,calcium ion binding,protein binding,phospholipid binding,calcium-dependent phospholipid binding,phospholipase A2 inhibitor activity,protein binding, bridging,double-stranded DNA-dependent ATPase activity,annealing helicase activity,protein homodimerization activity,calcium-depen…	DNA strand renaturation,neutrophil homeostasis,adaptive immune response,monocyte chemotaxis,regulation of leukocyte migration,phagocytosis,inflammatory response,signal transduction,cell surface receptor signaling pathway,G-protein coupled receptor signaling pathway,G-protein coupled receptor signaling pathway, coupled to cyclic nucleotide second messenger,regulation of cell shape,response to X-ra…
1.48631	6.77736e-07	3.29684e-06	Q9Y3T9	NOC2L	Nucleolar complex protein 2 homolog	8	nucleus,nucleoplasm,nucleolus,cytosol,Noc1p-Noc2p complex,Noc2p-Noc3p complex	chromatin binding,transcription corepressor activity,RNA binding,protein binding,nucleosome binding,histone binding,repressing transcription factor binding	negative regulation of transcription from RNA polymerase II promoter,negative regulation of B cell apoptotic process,transcription, DNA-templated,apoptotic process,chromatin assembly,cellular response to UV,negative regulation of histone acetylation,ribosomal large subunit biogenesis,regulation of signal transduction by p53 class mediator,negative regulation of intrinsic apoptotic signaling pathw…
1.48472	0.0975175	0.0896182	P38936	CDKN1A	Cyclin-dependent kinase inhibitor 1	1	cyclin-dependent protein kinase holoenzyme complex,nucleus,nucleoplasm,nucleolus,cytosol,nuclear body,protein complex,perinuclear region of cytoplasm,PCNA-p21 complex	cyclin-dependent protein serine/threonine kinase activity,protein kinase inhibitor activity,cyclin-dependent protein serine/threonine kinase inhibitor activity,protein binding,protein kinase binding,cyclin-dependent protein kinase activating kinase activity,cyclin binding,ubiquitin protein ligase binding,protein complex binding,metal ion binding	regulation of cyclin-dependent protein serine/threonine kinase activity,G1/S transition of mitotic cell cycle,G2/M transition of mitotic cell cycle,regulation of transcription from RNA polymerase II promoter,transcription initiation from RNA polymerase II promoter,cellular response to DNA damage stimulus,DNA damage response, signal transduction by p53 class mediator resulting in cell cycle arrest…
1.48435	0.00158431	0.00331247	Q9UHG0	DCDC2	Doublecortin domain-containing protein 2	2	nucleoplasm,cytoplasm,microtubule organizing center,cytosol,cilium,axoneme,microtubule cytoskeleton,kinocilium,mitotic spindle	protein binding,kinesin binding	neuron migration,cellular defense response,sensory perception of sound,regulation of Wnt signaling pathway,intracellular signal transduction,positive regulation of smoothened signaling pathway,cilium morphogenesis,regulation of cilium assembly
1.48315	0.0765892	0.0748159	O75164	KDM4A	Lysine-specific demethylase 4A	2	fibrillar center,nucleus,nucleoplasm,pericentric heterochromatin,cytosol	protein binding,zinc ion binding,ubiquitin protein ligase binding,histone demethylase activity,histone demethylase activity (H3-K9 specific),methylated histone binding,histone demethylase activity (H3-K36 specific)	transcription, DNA-templated,negative regulation of autophagy,positive regulation of gene expression,negative regulation of gene expression,cardiac muscle hypertrophy in response to stress,viral process,histone demethylation,response to nutrient levels,histone H3-K9 demethylation,positive regulation of neuron differentiation,negative regulation of transcription, DNA-templated,negative regulation …
1.4828	0.0121137	0.0177955	Q9Y5W7	SNX14	Sorting nexin-14	4	lysosome,lysosomal membrane,late endosome,integral component of membrane,dendrite,late endosome membrane	phosphatidylinositol-3,5-bisphosphate binding	protein transport,autophagosome maturation
1.48097	0.0028461	0.00545529	Q9UBC3	DNMT3B	DNA (cytosine-5)-methyltransferase 3B	2	nucleus,nucleoplasm,cytoplasm,intracellular membrane-bounded organelle	DNA binding,chromatin binding,transcription corepressor activity,DNA (cytosine-5-)-methyltransferase activity,protein binding,DNA-methyltransferase activity,histone deacetylase binding,metal ion binding	negative regulation of transcription from RNA polymerase II promoter,response to hypoxia,DNA methylation,response to toxic substance,response to ionizing radiation,positive regulation of gene expression,response to activity,response to caffeine,response to estradiol,response to vitamin A,response to cocaine,positive regulation of neuron differentiation,negative regulation of gene expression, epig…
1.47909	0.00134485	0.00287097	Q9NS56	TOPORS	E3 ubiquitin-protein ligase Topors	1	ubiquitin ligase complex,spindle pole,gamma-tubulin complex,nucleus,nucleoplasm,centriole,PML body,nuclear speck,midbody,photoreceptor connecting cilium,ciliary basal body,cytoplasmic dynein complex	DNA binding,antigen binding,ubiquitin-protein transferase activity,protein binding,SUMO transferase activity,DNA topoisomerase binding,metal ion binding,ubiquitin protein ligase activity	protein polyubiquitination,transcription, DNA-templated,ubiquitin-dependent protein catabolic process,protein monoubiquitination,cellular response to DNA damage stimulus,intrinsic apoptotic signaling pathway in response to DNA damage,retina layer formation,protein sumoylation,protein localization to nucleus,photoreceptor cell outer segment organization,regulation of cell proliferation,intrinsic a…
1.47412	1.33351e-05	4.90776e-05	P51648	ALDH3A2	Fatty aldehyde dehydrogenase	5	mitochondrial inner membrane,peroxisomal membrane,endoplasmic reticulum membrane,integral component of membrane,intracellular membrane-bounded organelle,extracellular exosome	aldehyde dehydrogenase (NAD) activity,aldehyde dehydrogenase [NAD(P)+] activity,long-chain-alcohol oxidase activity	fatty acid alpha-oxidation,cellular aldehyde metabolic process,central nervous system development,peripheral nervous system development,epidermis development,sphingolipid biosynthetic process,phytol metabolic process,oxidation-reduction process
1.47183	3.82439e-06	1.61659e-05	O95140	MFN2	Mitofusin-2	9	mitochondrion,mitochondrial outer membrane,cytosol,microtubule cytoskeleton,integral component of membrane,intrinsic component of mitochondrial outer membrane	GTPase activity,protein binding,GTP binding,ubiquitin protein ligase binding	blastocyst formation,protein targeting to mitochondrion,apoptotic process,response to unfolded protein,mitochondrial membrane organization,blood coagulation,mitochondrial fusion,macroautophagy,protein localization to pre-autophagosomal structure,negative regulation of Ras protein signal transduction,camera-type eye morphogenesis,negative regulation of smooth muscle cell proliferation,mitochondrio…
1.46968	0.0170352	0.023423	O15287	FANCG	Fanconi anemia group G protein	1	nucleoplasm,nucleolus,mitochondrion,cytosol,plasma membrane,Fanconi anaemia nuclear complex	damaged DNA binding,protein binding	cell cycle checkpoint,ovarian follicle development,DNA repair,mitochondrion organization,spermatid development,response to radiation,interstrand cross-link repair
1.46696	4.86327e-06	2.00135e-05	P40938	RFC3	Replication factor C subunit 3	2	nucleus,nucleoplasm,DNA replication factor C complex,Ctf18 RFC-like complex	DNA clamp loader activity,protein binding,DNA binding,ATPase activity,single-stranded DNA-dependent ATPase activity	DNA synthesis involved in DNA repair,DNA replication,DNA strand elongation involved in DNA replication,transcription-coupled nucleotide-excision repair,nucleotide-excision repair, DNA incision, 5'-to lesion,nucleotide-excision repair, DNA gap filling,translesion synthesis,telomere maintenance via semi-conservative replication,nucleotide-excision repair, DNA incision,error-prone translesion synthe…
1.46505	0.0247841	0.0315549	Q9NYF0	DACT1	Dapper homolog 1	1	nucleus,nucleoplasm,cytoplasm,cytosol,cell junction,synapse,beta-catenin destruction complex	RNA polymerase II transcription factor binding,protein kinase C binding,protein binding,beta-catenin binding,histone deacetylase binding,protein kinase A binding,delta-catenin binding	negative regulation of transcription from RNA polymerase II promoter,Wnt signaling pathway,neural tube development,positive regulation of Wnt signaling pathway,negative regulation of Wnt signaling pathway,regulation of protein stability,negative regulation of protein binding,positive regulation of protein binding,regulation of catenin import into nucleus,positive regulation of catenin import into…
1.45857	2.16474e-12	2.36399e-11	P53804	TTC3	E3 ubiquitin-protein ligase TTC3	21	nucleus,nucleolus,cytosol	ubiquitin-protein transferase activity,protein binding,metal ion binding	ubiquitin-dependent protein catabolic process,protein K48-linked ubiquitination
1.44705	0.000378866	0.000958461	Q9NV31	IMP3	U3 small nucleolar ribonucleoprotein protein IMP3	4	nucleus,nucleoplasm,nucleolus,small-subunit processome,Mpp10 complex,small ribosomal subunit	RNA binding,protein binding,snoRNA binding,structural constituent of ribosome,rRNA binding	rRNA processing,positive regulation of translational fidelity
1.44661	0.00797358	0.0127017	Q99741	CDC6	Cell division control protein 6 homolog	3	spindle pole,nucleus,nucleoplasm,cytoplasm,cytosol,spindle midzone,nucleolus	nucleotide binding,protein binding,ATP binding,kinase binding	DNA replication checkpoint,regulation of cyclin-dependent protein serine/threonine kinase activity,G1/S transition of mitotic cell cycle,regulation of transcription involved in G1/S transition of mitotic cell cycle,mitotic cell cycle,DNA replication,DNA replication initiation,traversing start control point of mitotic cell cycle,negative regulation of DNA replication,negative regulation of cell pr…
1.43626	0.0348657	0.0411568	P07686	HEXB	Beta-hexosaminidase subunit beta	1	acrosomal vesicle,extracellular region,membrane,azurophil granule lumen,azurophil granule,lysosomal lumen,extracellular exosome	beta-N-acetylhexosaminidase activity,protein binding,acetylglucosaminyltransferase activity,protein homodimerization activity,protein heterodimerization activity,Requires Ontology	skeletal system development,glycosphingolipid metabolic process,ganglioside catabolic process,cellular calcium ion homeostasis,lysosome organization,penetration of zona pellucida,sensory perception of sound,locomotory behavior,male courtship behavior,regulation of cell shape,phospholipid biosynthetic process,oligosaccharide catabolic process,lipid storage,chondroitin sulfate catabolic process,hya…
1.43162	0.00065425	0.00154983	Q13772	NCOA4	Nuclear receptor coactivator 4	6	nucleus,mitochondrion,autolysosome	transcription coactivator activity,androgen receptor binding	transcription, DNA-templated,protein targeting to lysosome,cellular iron ion homeostasis,male gonad development,androgen receptor signaling pathway,positive regulation of transcription, DNA-templated
1.42715	0.0105651	0.0159285	Q8TC05	MDM1	Nuclear protein MDM1	1	nucleus,centrosome,centriole,cytosol,microtubule	microtubule binding	negative regulation of centriole replication,retina development in camera-type eye
1.42301	0.00464604	0.00815094	Q99986	VRK1	Serine/threonine-protein kinase VRK1	5	nucleus,nucleoplasm,nucleolus,Golgi stack,spindle,cytosol	protein kinase activity,protein serine/threonine kinase activity,protein binding,ATP binding,protein kinase binding,nucleosomal histone binding,histone kinase activity (H3-S10 specific),histone kinase activity (H3-T3 specific)	protein phosphorylation,mitotic nuclear envelope disassembly,mitotic nuclear envelope reassembly,regulation of cell shape,histone H3-S10 phosphorylation,protein autophosphorylation,cell division,histone H3-T3 phosphorylation,Golgi disassembly
1.42116	0.000528464	0.00128135	Q9NWB7	IFT57	Intraflagellar transport protein 57 homolog	4	Golgi apparatus,centrosome,cilium,axoneme,intraciliary transport particle B,photoreceptor connecting cilium,ciliary basal body,dendrite terminus,ciliary tip	DNA binding,protein binding	neural tube closure,heart looping,transcription, DNA-templated,regulation of transcription, DNA-templated,apoptotic process,activation of cysteine-type endopeptidase activity involved in apoptotic process,smoothened signaling pathway,intraciliary transport involved in cilium morphogenesis,intraciliary transport,regulation of apoptotic process,motile cilium assembly,negative regulation of epitheli…
1.42077	3.17796e-29	1.30857e-27	Q15021	NCAPD2	Condensin complex subunit 1	29	condensed chromosome, centromeric region,condensed chromosome,condensin complex,condensin core heterodimer,nuclear condensin complex,nucleus,nucleoplasm,cytoplasm,cytosol,membrane,nuclear chromosome	chromatin binding,protein binding,histone binding	mitotic chromosome condensation,meiotic chromosome condensation,cell division,chromosome separation
1.41788	8.78966e-11	7.83791e-10	P18850	ATF6	Cyclic AMP-dependent transcription factor ATF-6 alpha	6	Golgi membrane,nucleus,nuclear envelope,nucleoplasm,endoplasmic reticulum,endoplasmic reticulum membrane,Golgi apparatus,cytosol,membrane,integral component of endoplasmic reticulum membrane	transcription regulatory region sequence-specific DNA binding,RNA polymerase II regulatory region sequence-specific DNA binding,RNA polymerase II core promoter proximal region sequence-specific DNA binding,transcriptional activator activity, RNA polymerase II core promoter proximal region sequence-specific binding,transcriptional activator activity, RNA polymerase II transcription regulatory regi…	eye development,regulation of transcription from RNA polymerase II promoter,transcription from RNA polymerase II promoter,protein folding,response to stress,positive regulation of transcription from RNA polymerase II promoter involved in unfolded protein response,signal transduction,visual perception,endoplasmic reticulum unfolded protein response,ATF6-mediated unfolded protein response,positive …
1.41553	0.0627128	0.0642671	Q5BJD5	TMEM41B	Transmembrane protein 41B	1	integral component of membrane		nervous system development
1.41223	0.00315225	0.00593007	Q9H3F6	KCTD10	BTB/POZ domain-containing adapter for CUL3-mediated RhoA degradation protein 3	3	nucleoplasm,cytosol,Cul3-RING ubiquitin ligase complex	Notch binding,protein binding,ubiquitin-protein transferase activity	ubiquitin-dependent protein catabolic process,protein ubiquitination,proteasome-mediated ubiquitin-dependent protein catabolic process,protein homooligomerization
1.41218	0.00111905	0.0024533	P30101	PDIA3	Protein disulfide-isomerase A3	6	extracellular space,nucleus,endoplasmic reticulum,endoplasmic reticulum lumen,focal adhesion,cell surface,melanosome,myelin sheath,phagocytic vesicle,recycling endosome membrane,extracellular exosome	RNA binding,protein disulfide isomerase activity,cysteine-type endopeptidase activity,phospholipase C activity,protein binding,disulfide oxidoreductase activity,peptide disulfide oxidoreductase activity,identical protein binding	antigen processing and presentation of peptide antigen via MHC class I,antigen processing and presentation of exogenous peptide antigen via MHC class I, TAP-dependent,protein folding,proteolysis,protein import into nucleus,protein retention in ER lumen,signal transduction,protein folding in endoplasmic reticulum,response to endoplasmic reticulum stress,cell redox homeostasis,oxidation-reduction p…
1.4108	0.603423	0.326831	P29373	CRABP2	Cellular retinoic acid-binding protein 2	1	nucleoplasm,endoplasmic reticulum,cytosol,extracellular exosome	retinoic acid binding,retinoid binding,protein binding,retinal binding,retinol binding	regulation of transcription, DNA-templated,signal transduction,epidermis development,embryonic forelimb morphogenesis,retinoic acid metabolic process,regulation of retinoic acid receptor signaling pathway,positive regulation of collateral sprouting
1.41056	2.96056e-23	8.25654e-22	Q5VYK3	ECM29	Proteasome-associated protein ECM29 homolog	25	nucleus,early endosome,late endosome,multivesicular body,endoplasmic reticulum,endoplasmic reticulum-Golgi intermediate compartment,centrosome,membrane,ER to Golgi transport vesicle,endocytic vesicle,cytoplasmic vesicle,trans-Golgi network,proteasome complex	molecular_function,protein binding,protein complex scaffold	ER-associated ubiquitin-dependent protein catabolic process,proteasome assembly
1.40741	2.17257e-05	7.58502e-05	Q8TCN5	ZNF507	Zinc finger protein 507	17	nucleus	DNA binding,metal ion binding	transcription, DNA-templated,regulation of transcription, DNA-templated
1.40656	0.0629342	0.0644346	Q9UMR2	DDX19B	ATP-dependent RNA helicase DDX19B	1	nuclear pore,nucleolus,cytoplasm,membrane,nuclear membrane,extracellular exosome,catalytic step 2 spliceosome	RNA binding,ATP-dependent RNA helicase activity,helicase activity,protein binding,ATP binding	mRNA export from nucleus,RNA splicing,regulation of gene expression,RNA secondary structure unwinding
1.40443	0.00355672	0.00655184	Q9H246	C1orf21	Uncharacterized protein C1orf21	1		protein binding
1.39798	0.00411009	0.00737519	Q9P2J3	KLHL9	Kelch-like protein 9	7	cytosol,midbody,Cul3-RING ubiquitin ligase complex	ubiquitin-protein transferase activity	cytokinesis,protein ubiquitination,post-translational protein modification
1.39751	2.87042e-09	2.04404e-08	Q99708	RBBP8	DNA endonuclease RBBP8	13	nucleus,nucleoplasm,chromosome,transcriptional repressor complex,intracellular membrane-bounded organelle	single-stranded DNA endodeoxyribonuclease activity,RNA polymerase II repressing transcription factor binding,RNA polymerase II transcription corepressor activity,damaged DNA binding,protein binding,identical protein binding	cell cycle checkpoint,G1/S transition of mitotic cell cycle,negative regulation of transcription from RNA polymerase II promoter,double-strand break repair via homologous recombination,DNA double-strand break processing,DNA synthesis involved in DNA repair,strand displacement,blastocyst hatching,DNA replication,DNA repair,nucleotide-excision repair,regulation of transcription from RNA polymerase …
1.39601	0.000335162	0.000859389	O43852	CALU	Calumenin	4	extracellular region,endoplasmic reticulum,endoplasmic reticulum lumen,endoplasmic reticulum membrane,Golgi apparatus,membrane,sarcoplasmic reticulum lumen,melanosome	calcium ion binding,protein binding	biological_process,post-translational protein modification,cellular protein metabolic process
1.39516	0.0151905	0.0214382	P10586	PTPRF	Receptor-type tyrosine-protein phosphatase F	1	plasma membrane,integral component of plasma membrane,neuron projection,neuronal cell body,extracellular exosome	protein tyrosine phosphatase activity,transmembrane receptor protein tyrosine phosphatase activity,heparin binding,protein complex binding,chondroitin sulfate proteoglycan binding	cell adhesion,transmembrane receptor protein tyrosine phosphatase signaling pathway,cell migration,neuron projection regeneration,peptidyl-tyrosine dephosphorylation,regulation of axon regeneration,negative regulation of receptor binding
1.39432	4.22774e-05	0.000136694	O00458	IFRD1	Interferon-related developmental regulator 1	2	nucleus,cytoplasm		myoblast fate determination,striated muscle tissue development,negative regulation of axon extension,muscle cell differentiation,skeletal muscle tissue regeneration,negative regulation of collateral sprouting
1.38874	0.000698058	0.00163719	Q13015	MLLT11	Protein AF1q	2	intracellular,nucleoplasm,microtubule organizing center,cytosol	molecular_function	positive regulation of apoptotic process,positive regulation of transcription, DNA-templated,positive regulation of mitochondrial depolarization,positive regulation of release of cytochrome c from mitochondria,extrinsic apoptotic signaling pathway,intrinsic apoptotic signaling pathway
1.38798	0.000370827	0.000940503	Q8IXI1	RHOT2	Mitochondrial Rho GTPase 2	6	cytosol,plasma membrane,membrane,integral component of mitochondrial outer membrane,extracellular exosome	GTPase activity,calcium ion binding,protein binding,GTP binding	cellular homeostasis,mitochondrion transport along microtubule,regulation of small GTPase mediated signal transduction,mitochondrial outer membrane permeabilization
1.38603	0.00060461	0.00144545	Q9NXB0	MKS1	Meckel syndrome type 1 protein	4	cytoplasm,centrosome,centriole,cytosol,membrane,MKS complex,ciliary basal body	protein binding	neural tube closure,determination of left/right symmetry,epithelial structure maintenance,embryonic digit morphogenesis,motile cilium assembly,embryonic skeletal system development,branching morphogenesis of an epithelial tube,inner ear receptor stereocilium organization,cilium morphogenesis,head development,regulation of canonical Wnt signaling pathway,common bile duct development,ciliary basal …
1.38437	4.20245e-05	0.00013619	P18075	BMP7	Bone morphogenetic protein 7	2	extracellular region,extracellular space,extracellular matrix,vesicle	cytokine activity,transforming growth factor beta receptor binding,protein binding,growth factor activity,heparin binding,BMP receptor binding	skeletal system development,ossification,metanephros development,ureteric bud development,mesoderm formation,mesonephros development,epithelial to mesenchymal transition,endocardial cushion formation,pericardium morphogenesis,axon guidance,embryonic pattern specification,regulation of receptor activity,negative regulation of striated muscle cell apoptotic process,positive regulation of epithelial…
1.37699	0.00456918	0.00803625	Q9NVR2	INTS10	Integrator complex subunit 10	3	nucleus,nucleoplasm,integrator complex	protein binding	snRNA processing,snRNA transcription from RNA polymerase II promoter
1.37492	0.00977416	0.0149746	O96017	CHEK2	Serine/threonine-protein kinase Chk2	2	nucleoplasm,Golgi apparatus,PML body,chromosome, telomeric region	protein serine/threonine kinase activity,protein binding,ATP binding,kinase activity,protein kinase binding,ubiquitin protein ligase binding,identical protein binding,protein homodimerization activity,metal ion binding	DNA damage checkpoint,G2/M transition of mitotic cell cycle,replicative cell aging,positive regulation of protein phosphorylation,double-strand break repair,transcription, DNA-templated,regulation of transcription, DNA-templated,protein phosphorylation,cellular response to DNA damage stimulus,DNA damage induced protein phosphorylation,DNA damage response, signal transduction by p53 class mediator…
1.36928	0.000274245	0.000722513	Q08050	FOXM1	Forkhead box protein M1	6	nucleus,nucleoplasm	RNA polymerase II regulatory region sequence-specific DNA binding,RNA polymerase II transcription factor activity, sequence-specific DNA binding,transcriptional repressor activity, RNA polymerase II transcription regulatory region sequence-specific binding,protein binding,protein kinase binding	G2/M transition of mitotic cell cycle,negative regulation of transcription from RNA polymerase II promoter,DNA repair,transcription, DNA-templated,DNA damage response, signal transduction by p53 class mediator resulting in transcription of p21 class mediator,positive regulation of cell proliferation,anatomical structure morphogenesis,cell differentiation,negative regulation of stress-activated MA…
1.36646	0.310243	0.208345	P83881	RPL36A	60S ribosomal protein L36a	3	endoplasmic reticulum,cytosol,ribosome,plasma membrane,cytosolic large ribosomal subunit	RNA binding,structural constituent of ribosome,protein binding	nuclear-transcribed mRNA catabolic process, nonsense-mediated decay,cytoplasmic translation,rRNA processing,translation,translational initiation,SRP-dependent cotranslational protein targeting to membrane,viral transcription
1.36314	0.0962672	0.0888777	O94768	STK17B	Serine/threonine-protein kinase 17B	1	nucleus,endoplasmic reticulum-Golgi intermediate compartment,plasma membrane,actin cytoskeleton	protein kinase activity,protein serine/threonine kinase activity,ATP binding	protein phosphorylation,apoptotic process,intracellular signal transduction,protein autophosphorylation,positive regulation of fibroblast apoptotic process
1.36033	0.183195	0.143041	P06280	GLA	Alpha-galactosidase A	1	extracellular region,cytoplasm,lysosome,Golgi apparatus,azurophil granule lumen,lysosomal lumen,extracellular exosome	catalytic activity,alpha-galactosidase activity,receptor binding,protein binding,hydrolase activity,galactoside binding,protein homodimerization activity,raffinose alpha-galactosidase activity	glycosphingolipid metabolic process,oligosaccharide metabolic process,glycoside catabolic process,neutrophil degranulation,negative regulation of nitric oxide biosynthetic process,glycosylceramide catabolic process,glycosphingolipid catabolic process,negative regulation of nitric-oxide synthase activity
1.36025	0.0423975	0.0479682	Q4KMZ1	IQCC	IQ domain-containing protein C	2
1.3589	0.00718252	0.0116653	Q14657	LAGE3	EKC/KEOPS complex subunit LAGE3	2	EKC/KEOPS complex,nucleoplasm,nuclear body	protein binding	tRNA processing,biological_process
1.35727	0.000182892	0.000502255	O95503	CBX6	Chromobox protein homolog 6	4	heterochromatin,nucleus,nucleoplasm,PcG protein complex	single-stranded RNA binding,protein binding	negative regulation of transcription from RNA polymerase II promoter,transcription, DNA-templated,chromatin modification
1.35588	0.0495447	0.0538864	Q7L1Q6	BZW1	Basic leucine zipper and W2 domain-containing protein 1	5	cytoplasm,membrane	RNA binding,cadherin binding	transcription, DNA-templated,regulation of transcription, DNA-templated
1.35442	6.51944e-09	4.37127e-08	Q86U44	METTL3	N6-adenosine-methyltransferase 70 kDa subunit	9	nucleus,nucleoplasm,nuclear speck,MIS complex	mRNA binding,protein binding,RNA methyltransferase activity,mRNA (2'-O-methyladenosine-N6-)-methyltransferase activity,protein heterodimerization activity,S-adenosyl-L-methionine binding	mRNA splicing, via spliceosome,RNA methylation,adenosine to inosine editing,mRNA processing,mRNA catabolic process,cellular response to DNA damage stimulus,spermatogenesis,circadian rhythm,RNA metabolic process,stem cell population maintenance,forebrain radial glial cell differentiation,primary miRNA processing,cellular response to UV,gliogenesis,regulation of T cell differentiation,negative regu…
1.35191	0.000127676	0.000364937	Q6NSI4	CXorf57	Uncharacterized protein CXorf57	7	replication fork	single-stranded DNA binding,RNA binding,protein binding	negative regulation of double-strand break repair via homologous recombination
1.35114	0.0688634	0.0689998	Q9H9L7	AKIRIN1	Akirin-1	2	nucleus,nucleoplasm,nuclear membrane	protein binding
1.34959	5.31242e-05	0.000167963	Q6ZXV5	TMTC3	Transmembrane and TPR repeat-containing protein 3	3	endoplasmic reticulum,integral component of membrane	protein binding	response to endoplasmic reticulum stress,positive regulation of proteasomal protein catabolic process
1.34628	0.002444	0.00477077	P67812	SEC11A	Signal peptidase complex catalytic subunit SEC11A	2	signal peptidase complex,endoplasmic reticulum membrane,integral component of membrane,organelle membrane,extracellular exosome	peptidase activity,serine-type peptidase activity	signal peptide processing
1.34618	0.569563	0.314676	P04792	HSPB1	Heat shock protein beta-1	2	proteasome complex,extracellular space,nucleus,cytoplasm,spindle,cytosol,cytoskeleton,plasma membrane,focal adhesion,Z disc,extracellular matrix,extracellular exosome,axon cytoplasm	RNA binding,protein kinase C binding,protein binding,protein kinase C inhibitor activity,protein kinase binding,identical protein binding,protein homodimerization activity,ubiquitin binding,protein binding involved in protein folding	retina homeostasis,regulation of protein phosphorylation,regulation of translational initiation,negative regulation of protein kinase activity,movement of cell or subcellular component,response to unfolded protein,response to virus,regulation of autophagy,positive regulation of interleukin-1 beta production,intracellular signal transduction,cellular response to vascular endothelial growth factor …
1.34462	7.7566e-06	3.02992e-05	Q96AV8	E2F7	Transcription factor E2F7	6	nucleoplasm,transcription factor complex,nuclear speck	RNA polymerase II regulatory region sequence-specific DNA binding,core promoter binding,transcriptional repressor activity, RNA polymerase II transcription regulatory region sequence-specific binding,transcription factor activity, sequence-specific DNA binding,transcription corepressor activity,protein binding,identical protein binding	negative regulation of transcription from RNA polymerase II promoter,placenta development,sprouting angiogenesis,transcription, DNA-templated,DNA damage response, signal transduction by p53 class mediator resulting in cell cycle arrest,negative regulation of cell proliferation,DNA damage response, signal transduction by p53 class mediator,negative regulation of cytokinesis,positive regulation of …
1.34334	0.0387081	0.0446828	Q8N726	CDKN2A	Tumor suppressor ARF	3
1.34176	0.0248994	0.0316665	O15119	TBX3	T-box transcription factor TBX3	2	nucleus	RNA polymerase II core promoter proximal region sequence-specific DNA binding,transcriptional repressor activity, RNA polymerase II core promoter proximal region sequence-specific binding,RNA polymerase II transcription factor binding,RNA polymerase II activating transcription factor binding,protein binding,sequence-specific DNA binding	negative regulation of transcription from RNA polymerase II promoter,skeletal system development,blood vessel development,in utero embryonic development,heart looping,outflow tract morphogenesis,atrioventricular bundle cell differentiation,transcription, DNA-templated,regulation of transcription from RNA polymerase II promoter,cell aging,positive regulation of cell proliferation,anterior/posterio…
1.34022	0.00645354	0.010672	Q68CL5	TPGS2	Tubulin polyglutamylase complex subunit 2	2	cytoplasm,microtubule
1.33942	3.09799e-06	1.33699e-05	P51530	DNA2	DNA replication ATP-dependent helicase/nuclease DNA2	12	nuclear chromosome, telomeric region,nucleus,nucleoplasm,mitochondrion,mitochondrial nucleoid,gamma DNA polymerase complex	DNA binding,DNA helicase activity,helicase activity,nuclease activity,protein binding,ATP binding,ATPase activity,site-specific endodeoxyribonuclease activity, specific for altered base,5'-flap endonuclease activity,5'-3' DNA helicase activity,single-stranded DNA-dependent ATPase activity,metal ion binding,4 iron, 4 sulfur cluster binding	DNA replication checkpoint,telomere maintenance,DNA double-strand break processing,DNA synthesis involved in DNA repair,strand displacement,DNA replication,mitochondrial DNA replication,base-excision repair,telomere maintenance via semi-conservative replication,DNA duplex unwinding,DNA replication, Okazaki fragment processing,DNA replication, removal of RNA primer,mitochondrial DNA repair,G-quadr…
1.33936	1.13359e-18	2.34767e-17	P41229	KDM5C	Lysine-specific demethylase 5C	33	nucleus,nucleoplasm,cytosol	DNA binding,protein binding,zinc ion binding,histone demethylase activity,histone demethylase activity (H3-K4 specific),dioxygenase activity	transcription, DNA-templated,response to toxic substance,histone H3-K4 demethylation,negative regulation of transcription, DNA-templated,rhythmic process,oxidation-reduction process
1.33877	1.28209e-05	4.74345e-05	Q16533	SNAPC1	snRNA-activating protein complex subunit 1	5	nucleus,nucleoplasm,nucleolus,snRNA-activating protein complex	sequence-specific DNA binding	regulation of transcription, DNA-templated,snRNA transcription from RNA polymerase II promoter,snRNA transcription from RNA polymerase III promoter
1.33586	0.0393612	0.0453172	Q96DR7	ARHGEF26	Rho guanine nucleotide exchange factor 26	2	ruffle,cytosol	guanyl-nucleotide exchange factor activity,Rho guanyl-nucleotide exchange factor activity	endothelial cell morphogenesis,G-protein coupled receptor signaling pathway,regulation of Rho protein signal transduction,positive regulation of apoptotic process,regulation of small GTPase mediated signal transduction,regulation of molecular function,ruffle assembly
1.33559	0.00980322	0.0150124	Q9Y575	ASB3	Ankyrin repeat and SOCS box protein 3	1	ubiquitin ligase complex,nucleus,cytoplasm,cytosol	ubiquitin-protein transferase activity,protein binding,ubiquitin protein ligase binding	protein ubiquitination,intracellular signal transduction,post-translational protein modification
1.32867	2.14188e-12	2.34269e-11	Q14746	COG2	Conserved oligomeric Golgi complex subunit 2	14	Golgi membrane,Golgi stack,cytosol,Golgi transport complex,trans-Golgi network membrane	protein binding,protein transporter activity,protein complex binding	ER to Golgi vesicle-mediated transport,intra-Golgi vesicle-mediated transport,Golgi organization,protein transport
1.32708	0.545894	0.305774	P68036	UBE2L3	Ubiquitin-conjugating enzyme E2 L3	1	ubiquitin ligase complex,nucleus,nucleoplasm,cytoplasm,cytosol,extracellular exosome	transcription coactivator activity,RNA binding,ubiquitin-protein transferase activity,protein binding,ATP binding,enzyme binding,ubiquitin protein ligase binding,ubiquitin conjugating enzyme activity,ubiquitin-protein transferase activator activity	protein polyubiquitination,transcription, DNA-templated,regulation of transcription, DNA-templated,cellular protein modification process,ubiquitin-dependent protein catabolic process,cell proliferation,protein ubiquitination,positive regulation of protein ubiquitination,protein ubiquitination involved in ubiquitin-dependent protein catabolic process,cell cycle phase transition,positive regulation…
1.32242	0.11026	0.0984341	P30279	CCND2	G1/S-specific cyclin-D2	1	cyclin-dependent protein kinase holoenzyme complex,chromatin,nucleus,nucleoplasm,nucleolus,cytosol,nuclear membrane,cyclin D2-CDK4 complex	protein binding,protein kinase binding	positive regulation of protein phosphorylation,cell cycle,long-term memory,positive regulation of cell proliferation,adult locomotory behavior,negative regulation of apoptotic process,positive regulation of cyclin-dependent protein serine/threonine kinase activity,cell division,cellular response to X-ray,positive regulation of G1/S transition of mitotic cell cycle
1.32183	0.0626183	0.0642145	O43257	ZNHIT1	Zinc finger HIT domain-containing protein 1	1	Swr1 complex,nucleus,nucleoplasm	protein binding,nucleosome binding,histone deacetylase binding,metal ion binding	regulation of histone deacetylation,histone exchange
1.32096	0.0515828	0.0556363	O95671	ASMTL	N-acetylserotonin O-methyltransferase-like protein	3	cytosol	molecular_function,protein binding,O-methyltransferase activity,nucleoside-triphosphate diphosphatase activity	biological_process,methylation
1.31709	0.0703415	0.0700912	Q16600	ZNF239	Zinc finger protein 239	1	nucleus	RNA polymerase II core promoter proximal region sequence-specific DNA binding,transcriptional repressor activity, RNA polymerase II core promoter proximal region sequence-specific binding,DNA binding,transcription factor activity, sequence-specific DNA binding,RNA binding,protein binding,metal ion binding	negative regulation of transcription from RNA polymerase II promoter,transcription, DNA-templated,regulation of transcription, DNA-templated
1.31329	0.00128791	0.00276971	Q13888;Q6P1K8	GTF2H2;GTF2H2C	General transcription factor IIH subunit 2;General transcription factor IIH subunit 2-like protein	4	core TFIIH complex portion of holo TFIIH complex,nucleus,nucleoplasm,transcription factor TFIID complex,holo TFIIH complex,nuclear speck;core TFIIH complex,holo TFIIH complex,nuclear speck	nucleic acid binding,transcription factor activity, sequence-specific DNA binding,protein binding,translation factor activity, RNA binding,zinc ion binding,protein N-terminus binding,protein kinase activity,DNA-dependent ATPase activity,RNA polymerase II carboxy-terminal domain kinase activity;nucleic acid binding,protein binding,zinc ion binding	nucleotide-excision repair, DNA duplex unwinding,G-protein coupled receptor internalization,transcription-coupled nucleotide-excision repair,nucleotide-excision repair,nucleotide-excision repair, preincision complex stabilization,nucleotide-excision repair, preincision complex assembly,nucleotide-excision repair, DNA incision, 3'-to lesion,nucleotide-excision repair, DNA incision, 5'-to lesion,re…
1.31178	0.000135069	0.000384188	Q9UJZ1	STOML2	Stomatin-like protein 2, mitochondrial	2	mitochondrial inner membrane,mitochondrial intermembrane space,cytoskeleton,extrinsic component of plasma membrane,membrane raft,immunological synapse,COP9 signalosome,actin cytoskeleton,T cell receptor complex	receptor binding,protein binding,GTPase binding,cardiolipin binding	mitochondrial calcium ion transport,cellular calcium ion homeostasis,mitochondrion organization,lipid localization,positive regulation of mitochondrial membrane potential,interleukin-2 production,mitochondrial protein processing,CD4-positive, alpha-beta T cell activation,mitochondrial ATP synthesis coupled proton transport,T cell receptor signaling pathway,protein oligomerization,positive regulat…
1.31082	1.66413e-17	3.0899e-16	Q9Y285	FARSA	Phenylalanine--tRNA ligase alpha subunit	11	cytoplasm,cytosol,phenylalanine-tRNA ligase complex,membrane	tRNA binding,RNA binding,phenylalanine-tRNA ligase activity,protein binding,ATP binding	tRNA aminoacylation for protein translation,phenylalanyl-tRNA aminoacylation,protein heterotetramerization
1.30896	0.0559336	0.0590997	Q16864	ATP6V1F	V-type proton ATPase subunit F	1	cytosol,membrane,proton-transporting two-sector ATPase complex,vacuolar proton-transporting V-type ATPase complex,proton-transporting V-type ATPase, V1 domain,extracellular exosome	protein binding,hydrogen ion transmembrane transporter activity,ATPase activity, uncoupled,ATPase coupled ion transmembrane transporter activity,proton-transporting ATPase activity, rotational mechanism	insulin receptor signaling pathway,ATP hydrolysis coupled proton transport,proton transport,transferrin transport,ion transmembrane transport,phagosome acidification
1.30745	0.147187	0.122246	Q9Y6M4	CSNK1G3	Casein kinase I isoform gamma-3	3	nucleus,cytoplasm	protein kinase activity,protein serine/threonine kinase activity,ATP binding	cellular protein modification process,endocytosis,signal transduction,regulation of cell shape,Wnt signaling pathway,peptidyl-serine phosphorylation
1.30641	0.000640188	0.00152012	Q86U06	RBM23	Probable RNA-binding protein 23	3	nucleus,membrane	RNA binding,protein binding	mRNA processing
1.30303	1.60719e-18	3.26096e-17	Q7Z2Z1	TICRR	Treslin	19	nucleus,nucleoplasm	chromatin binding,protein binding	cell cycle checkpoint,formation of translation preinitiation complex,DNA replication,DNA repair,response to ionizing radiation,regulation of DNA-dependent DNA replication initiation,mitotic DNA replication checkpoint
1.30233	1.81079e-05	6.4605e-05	Q14146	URB2	Unhealthy ribosome biogenesis protein 2 homolog	5	nucleolus,aggresome,midbody		ribosome biogenesis
1.29717	0.00169076	0.00350054	Q9NUC0	SERTAD4	SERTA domain-containing protein 4	1	nucleus
1.29436	0.247542	0.178161	O76064	RNF8	E3 ubiquitin-protein ligase RNF8	2	ubiquitin ligase complex,chromosome, telomeric region,nucleus,nucleoplasm,cytosol,midbody,site of double-strand break	chromatin binding,ubiquitin-protein transferase activity,protein binding,zinc ion binding,ubiquitin protein ligase binding,histone binding,identical protein binding,protein homodimerization activity	double-strand break repair,double-strand break repair via nonhomologous end joining,ubiquitin-dependent protein catabolic process,cellular response to DNA damage stimulus,cell cycle,spermatid development,response to ionizing radiation,histone H2A ubiquitination,histone H2B ubiquitination,negative regulation of transcription elongation from RNA polymerase II promoter,spermatogenesis, exchange of c…
1.29319	0.0916943	0.0856042	O00423	EML1	Echinoderm microtubule-associated protein-like 1	1	cytosol,microtubule,microtubule associated complex,perinuclear region of cytoplasm,microtubule cytoskeleton,mitotic spindle pole,mitotic spindle midzone	calcium ion binding,protein binding,microtubule binding,tubulin binding	microtubule cytoskeleton organization,hematopoietic progenitor cell differentiation,mitotic spindle organization,neuroblast proliferation,brain development
1.28808	0.00486764	0.00848443	Q5TC12	ATPAF1	ATP synthase mitochondrial F1 complex assembly factor 1	2	mitochondrion	protein binding	mitochondrial proton-transporting ATP synthase complex assembly
1.28143	0.000122043	0.000351276	O75792	RNASEH2A	Ribonuclease H2 subunit A	5	nucleoplasm,cytosol,ribonuclease H2 complex	RNA binding,RNA-DNA hybrid ribonuclease activity,ribonuclease activity,metal ion binding	DNA replication,mismatch repair,RNA catabolic process,DNA replication, removal of RNA primer,RNA phosphodiester bond hydrolysis, endonucleolytic
1.27829	0.000796432	0.00182968	Q6PID6	TTC33	Tetratricopeptide repeat protein 33	3		protein binding
1.2761	0.029406	0.0360563	Q01105	SET	Protein SET	8	nucleus,nucleoplasm,cytoplasm,endoplasmic reticulum,lipid particle,cytosol,protein complex,perinuclear region of cytoplasm	DNA binding,protein phosphatase inhibitor activity,protein binding,protein phosphatase regulator activity,histone binding	DNA replication,nucleosome assembly,nucleosome disassembly,nucleocytoplasmic transport,viral process,negative regulation of phosphoprotein phosphatase activity,negative regulation of histone acetylation,regulation of mRNA stability,negative regulation of neuron apoptotic process,negative regulation of transcription, DNA-templated
1.27534	0.00222685	0.00443213	Q96EK4	THAP11	THAP domain-containing protein 11	2	nucleoplasm,cytoplasm,intercellular bridge	RNA polymerase II core promoter proximal region sequence-specific DNA binding,transcriptional repressor activity, RNA polymerase II core promoter proximal region sequence-specific binding,DNA binding,protein binding,zinc ion binding	negative regulation of transcription from RNA polymerase II promoter,transcription, DNA-templated
1.27118	3.07536e-12	3.28665e-11	Q9H799	C5orf42	Uncharacterized protein C5orf42	28	integral component of membrane,ciliary transition zone		establishment of planar polarity,kidney development,ventricular septum development,cerebellum development,embryonic digit morphogenesis,palate development,cilium morphogenesis,coronary vasculature development,protein localization to ciliary transition zone
1.26836	0.00199156	0.00402916	O15511	ARPC5	Actin-related protein 2/3 complex subunit 5	4	extracellular region,cytoplasm,endosome,cytosol,Arp2/3 protein complex,focal adhesion,actin cytoskeleton,lamellipodium,growth cone,secretory granule lumen,extracellular exosome,ficolin-1-rich granule lumen	structural constituent of cytoskeleton,protein binding,actin filament binding	movement of cell or subcellular component,smooth muscle cell migration,cell migration,orbitofrontal cortex development,maintenance of cell polarity,actin cytoskeleton organization,Arp2/3 complex-mediated actin nucleation,Fc-gamma receptor signaling pathway involved in phagocytosis,neutrophil degranulation,ephrin receptor signaling pathway,actin filament network formation,membrane organization,Req…
1.26757	6.15108e-10	4.89847e-09	O95229	ZWINT	ZW10 interactor	6	kinetochore,condensed chromosome kinetochore,nucleus,nucleoplasm,cytoplasm,cytosol,nuclear body,dendrite	protein binding,protein N-terminus binding	mitotic sister chromatid segregation,sister chromatid cohesion,mitotic cell cycle checkpoint,cell division,establishment of localization in cell
1.26048	0.189855	0.146768	Q7L3S4	ZNF771	Zinc finger protein 771	1	nucleus,nucleolus	DNA binding,metal ion binding	transcription, DNA-templated,regulation of transcription, DNA-templated
1.26023	5.50069e-15	7.95555e-14	Q9UKK3	PARP4	Poly [ADP-ribose] polymerase 4	20	nucleus,cytoplasm,cytosol,spindle microtubule,membrane,intracellular ribonucleoprotein complex,extracellular exosome	DNA binding,NAD+ ADP-ribosyltransferase activity,protein binding,enzyme binding	DNA repair,cellular protein modification process,protein ADP-ribosylation,inflammatory response,cellular response to DNA damage stimulus,cell death,response to drug,regulation of telomerase activity
1.25745	0.73999	0.373065	Q9BVC3	DSCC1	Sister chromatid cohesion protein DCC1	3	chromosome, centromeric region,chromatin,nucleoplasm,Ctf18 RFC-like complex	protein binding,DNA clamp loader activity,single-stranded DNA-dependent ATPase activity	DNA replication,regulation of DNA replication,maintenance of mitotic sister chromatid cohesion,post-translational protein acetylation,positive regulation of DNA-directed DNA polymerase activity
1.25688	4.52844e-21	1.10836e-19	Q6PL18	ATAD2	ATPase family AAA domain-containing protein 2	30	nucleus,nucleoplasm,extracellular exosome	chromatin binding,protein binding,ATP binding,ATPase activity,histone binding	chromatin organization,transcription, DNA-templated,regulation of transcription from RNA polymerase II promoter,negative regulation of chromatin silencing,positive regulation of transcription, DNA-templated,positive regulation of transcription from RNA polymerase II promoter
1.24842	0.171519	0.136762	P49441	INPP1	Inositol polyphosphate 1-phosphatase	1	cytosol	inositol-1,4-bisphosphate 1-phosphatase activity,protein binding,metal ion binding,inositol-1,3,4-trisphosphate 1-phosphatase activity	phosphate-containing compound metabolic process,signal transduction,dephosphorylation,inositol phosphate metabolic process,phosphatidylinositol phosphorylation
1.24739	0.0621842	0.0639097	Q96GV9	C5orf30	UNC119-binding protein C5orf30	1	cytoplasm,ciliary transition zone	protein binding	negative regulation of fibroblast migration,protein transport,cilium morphogenesis,negative regulation of cytokine production involved in inflammatory response
1.24246	6.47412e-13	7.65521e-12	Q5SWA1	PPP1R15B	Protein phosphatase 1 regulatory subunit 15B	13	protein phosphatase type 1 complex	protein binding,protein phosphatase regulator activity	negative regulation of protein phosphorylation,ER overload response,response to hydrogen peroxide,regulation of phosphoprotein phosphatase activity,peptidyl-serine dephosphorylation,negative regulation of PERK-mediated unfolded protein response,negative regulation of endoplasmic reticulum stress-induced eIF2 alpha phosphorylation
1.24223	0.799188	0.391637	P07476	IVL	Involucrin	9	cornified envelope,cytoplasm,centrosome,cytosol,nuclear body,extracellular exosome	structural molecule activity,protein binding,protein binding, bridging	response to UV-B,peptide cross-linking,isopeptide cross-linking via N6-(L-isoglutamyl)-L-lysine,keratinocyte differentiation,cornification
1.23508	0.000457082	0.00113059	P42695	NCAPD3	Condensin-2 complex subunit D3	11	condensed chromosome, centromeric region,nuclear condensin complex,nucleoplasm,membrane,nuclear pericentric heterochromatin	chromatin binding,protein binding,methylated histone binding	mitotic chromosome condensation,meiotic chromosome condensation,cell division,chromosome separation
1.23031	6.80156e-41	5.47252e-39	P33993	MCM7	DNA replication licensing factor MCM7	31	nuclear chromosome, telomeric region,chromatin,nucleus,nucleoplasm,cytosol,membrane,MCM complex,nucleolus	single-stranded DNA binding,protein binding,ATP binding,DNA binding,ATP-dependent DNA helicase activity	G1/S transition of mitotic cell cycle,DNA replication,DNA unwinding involved in DNA replication,DNA replication initiation,cellular response to DNA damage stimulus,cell proliferation,regulation of phosphorylation,response to drug,cellular response to epidermal growth factor stimulus,cellular response to xenobiotic stimulus
1.22525	0.0220048	0.0287216	P31276	HOXC13	Homeobox protein Hox-C13	2	nucleus	transcriptional activator activity, RNA polymerase II core promoter proximal region sequence-specific binding,chromatin binding,protein binding,sequence-specific DNA binding	hair follicle development,transcription from RNA polymerase II promoter,anatomical structure morphogenesis,anterior/posterior pattern specification,nail development,tongue morphogenesis,positive regulation of transcription from RNA polymerase II promoter
1.22455	0.00641022	0.0106104	Q8NEM0	MCPH1	Microcephalin	5	nucleoplasm,cytoplasm,microtubule organizing center	protein binding,identical protein binding	negative regulation of transcription from RNA polymerase II promoter,establishment of mitotic spindle orientation,cerebral cortex development,regulation of kinase activity,regulation of centrosome cycle,regulation of inflammatory response,bone development,regulation of chromosome condensation,protein localization to centrosome,mitotic cell cycle arrest,neuronal stem cell population maintenance
1.22244	0.351678	0.227161	P53677	AP3M2	AP-3 complex subunit mu-2	1	Golgi apparatus,AP-type membrane coat adaptor complex,clathrin adaptor complex,cytoplasmic vesicle membrane,axon cytoplasm		intracellular protein transport,anterograde axonal transport,anterograde synaptic vesicle transport
1.21832	0.161415	0.130821	Q92688	ANP32B	Acidic leucine-rich nuclear phosphoprotein 32 family member B	1	nucleus,cytoplasm,extracellular exosome,nucleolus	protein binding,histone binding,RNA polymerase binding	vasculature development,nucleosome assembly,activation of cysteine-type endopeptidase activity involved in apoptotic process,ventricular system development,histone exchange,negative regulation of cell differentiation,positive regulation of protein export from nucleus,inner ear development,palate development
1.21449	0.498468	0.288513	P25391	LAMA1	Laminin subunit alpha-1	4	extracellular region,proteinaceous extracellular matrix,basement membrane,laminin-1 complex,laminin-3 complex,extracellular space,membrane,extracellular matrix	receptor binding,extracellular matrix structural constituent,protein binding,protein C-terminus binding	cell adhesion,cell surface receptor signaling pathway,regulation of cell adhesion,extracellular matrix organization,regulation of cell migration,regulation of embryonic development
1.21385	0.174015	0.138131	Q9BRT9	GINS4	DNA replication complex GINS protein SLD5	3	GINS complex,nucleoplasm,cytoplasm,replication fork protection complex	protein binding,3'-5' DNA helicase activity	double-strand break repair via break-induced replication,inner cell mass cell proliferation,DNA replication initiation,DNA strand elongation involved in DNA replication,DNA duplex unwinding
1.21242	0.0573376	0.0602369	Q9Y4K4	MAP4K5	Mitogen-activated protein kinase kinase kinase kinase 5	3	cytoplasm	protein kinase activity,protein serine/threonine kinase activity,protein binding,ATP binding,MAP kinase kinase kinase kinase activity	activation of MAPKKK activity,protein phosphorylation,activation of JUN kinase activity,regulation of mitotic cell cycle,intracellular signal transduction,regulation of apoptotic process
1.21073	0.0502957	0.0544663	Q9BWG4	SSBP4	Single-stranded DNA-binding protein 4	2	nucleus	RNA polymerase II core promoter proximal region sequence-specific DNA binding,transcriptional activator activity, RNA polymerase II core promoter proximal region sequence-specific binding,single-stranded DNA binding,protein binding	transcription from RNA polymerase II promoter,positive regulation of transcription from RNA polymerase II promoter
1.20942	5.69096e-05	0.00017864	Q14106	TOB2	Protein Tob2	6	nucleus,cytoplasm,cytosol	transcription corepressor activity,protein binding,vitamin D receptor binding	female gamete generation,negative regulation of cell proliferation,regulation of gene expression,signaling,negative regulation of osteoclast differentiation,positive regulation of ossification,negative regulation of nucleic acid-templated transcription
1.20886	0.000470679	0.00115646	Q96TA2	YME1L1	ATP-dependent zinc metalloprotease YME1L1	3	mitochondrion,mitochondrial inner membrane,membrane,integral component of membrane,nuclear body	ATP-dependent peptidase activity,metalloendopeptidase activity,protein binding,ATP binding,metallopeptidase activity,metal ion binding	misfolded or incompletely synthesized protein catabolic process,mitochondrial calcium ion transport,mitochondrion organization,cell proliferation,protein hexamerization,mitochondrial protein processing,mitochondrial protein catabolic process,negative regulation of apoptotic process
1.2052	0.0232567	0.0300087	Q6AI39	GLTSCR1L	GLTSCR1-like protein	1
1.202	9.4598e-24	2.73468e-22	Q8IXJ9	ASXL1	Putative Polycomb group protein ASXL1	22	nucleoplasm,PR-DUB complex,extracellular exosome	DNA binding,transcription coactivator activity,protein binding,retinoic acid receptor binding,peroxisome proliferator activated receptor binding,metal ion binding	cell morphogenesis,heart morphogenesis,transcription, DNA-templated,protein deubiquitination,hemopoiesis,response to retinoic acid,negative regulation of peroxisome proliferator activated receptor signaling pathway,monoubiquitinated histone H2A deubiquitination,negative regulation of fat cell differentiation,positive regulation of transcription from RNA polymerase II promoter,positive regulation …
1.20053	5.9973e-05	0.000187165	Q5TA45	CPSF3L	Integrator complex subunit 11	7	nucleus,nucleoplasm,cytoplasm,cytosol,integrator complex,blood microparticle	hydrolase activity,protein binding	snRNA processing,snRNA transcription from RNA polymerase II promoter
1.19918	1.13979e-07	6.32213e-07	Q9Y462	ZNF711	Zinc finger protein 711	14	nucleus,extracellular exosome	protein binding,sequence-specific DNA binding,metal ion binding	transcription, DNA-templated,positive regulation of transcription, DNA-templated
1.19584	0.00396775	0.00717841	Q96DH6	MSI2	RNA-binding protein Musashi homolog 2	6	cytoplasm,polysome	RNA binding,protein binding,poly(U) RNA binding	stem cell development
1.19551	2.67353e-05	9.08921e-05	Q8N201	INTS1	Integrator complex subunit 1	8	nucleoplasm,membrane,integral component of membrane,nuclear membrane,integrator complex		snRNA processing,U2 snRNA 3'-end processing,snRNA transcription from RNA polymerase II promoter
1.1947	5.26937e-09	3.60563e-08	Q9Y4C2	TCAF1	TRPM8 channel-associated factor 1	12	plasma membrane	protein binding,ion channel binding	negative regulation of cell migration,positive regulation of protein targeting to membrane,positive regulation of anion channel activity
1.19466	0.0968535	0.0892489	Q15011	HERPUD1	Homocysteine-responsive endoplasmic reticulum-resident ubiquitin-like domain member 1 protein	1	endoplasmic reticulum,endoplasmic reticulum membrane,membrane,Lewy body core,calcium channel complex	molecular_function,protein binding,ion channel binding	ubiquitin-dependent protein catabolic process,response to unfolded protein,retrograde protein transport, ER to cytosol,regulation of protein ubiquitination,positive regulation of protein binding,endoplasmic reticulum calcium ion homeostasis,response to endoplasmic reticulum stress,PERK-mediated unfolded protein response,negative regulation of cysteine-type endopeptidase activity involved in apopt…
1.18945	2.42057e-09	1.745e-08	P00374	DHFR	Dihydrofolate reductase	11	cellular_component,mitochondrion,cytosol	translation repressor activity, nucleic acid binding,mRNA binding,dihydrofolate reductase activity,folic acid binding,drug binding,folate reductase activity,methotrexate binding,NADPH binding,sequence-specific mRNA binding	regulation of transcription involved in G1/S transition of mitotic cell cycle,glycine biosynthetic process,tetrahydrobiopterin biosynthetic process,one-carbon metabolic process,nucleotide biosynthetic process,negative regulation of translation,axon regeneration,response to methotrexate,dihydrofolate metabolic process,tetrahydrofolate metabolic process,tetrahydrofolate biosynthetic process,folic a…
1.18833	5.57688e-09	3.79749e-08	P22314	UBA1	Ubiquitin-like modifier-activating enzyme 1	16	nucleus,nucleoplasm,cytoplasm,mitochondrion,cytosol,extracellular exosome,heterochromatin,lysosomal membrane,endosome membrane,desmosome,rough endoplasmic reticulum membrane	RNA binding,ubiquitin activating enzyme activity,protein binding,ATP binding	ubiquitin-dependent protein catabolic process,cellular response to DNA damage stimulus,protein ubiquitination
1.18261	0.00990899	0.0151381	O14525	ASTN1	Astrotactin-1	1	cellular_component,endosome,external side of plasma membrane,integral component of membrane,clathrin-coated vesicle,perikaryon		neuron migration,neuron cell-cell adhesion,locomotory behavior
1.17403	0.00455913	0.00802462	Q92802	N4BP2L2	NEDD4-binding protein 2-like 2	3	nucleus,transcriptional repressor complex,extracellular exosome	RNA polymerase II transcription corepressor activity,molecular_function,protein binding,enzyme binding	negative regulation of transcription from RNA polymerase II promoter,positive regulation of hematopoietic stem cell proliferation,negative regulation of hematopoietic stem cell differentiation
1.17289	0.00407863	0.00733736	Q8WY91	THAP4	THAP domain-containing protein 4	3	cellular_component	DNA binding,heme binding,protein homodimerization activity,metal ion binding	biological_process
1.17189	0.00193058	0.00392964	Q92698	RAD54L	DNA repair and recombination protein RAD54-like	3	nucleus,nucleoplasm,protein complex	DNA binding,helicase activity,protein binding,ATP binding,annealing helicase activity	double-strand break repair via homologous recombination,DNA strand renaturation,DNA repair,DNA recombination,determination of adult lifespan,response to ionizing radiation,response to drug,meiotic cell cycle
1.16661	0.214189	0.160475	P18827	SDC1	Syndecan-1	1	Golgi lumen,plasma membrane,integral component of plasma membrane,external side of plasma membrane,cell surface,lysosomal lumen,protein complex,extracellular exosome	protein binding,protein C-terminus binding,identical protein binding	retinoid metabolic process,ureteric bud development,glycosaminoglycan biosynthetic process,glycosaminoglycan catabolic process,inflammatory response,cell migration,glycosaminoglycan metabolic process,wound healing,odontogenesis,response to hydrogen peroxide,myoblast development,leukocyte migration,response to glucocorticoid,response to cAMP,response to calcium ion,striated muscle cell development…
1.16508	0.0637262	0.0650267	Q6P6C2	ALKBH5	RNA demethylase ALKBH5	1	nucleus,nucleoplasm,Golgi apparatus,cytosol,nuclear speck	RNA binding,oxidoreductase activity, acting on paired donors, with incorporation or reduction of molecular oxygen, 2-oxoglutarate as one donor, and incorporation of one atom each of oxygen into both donors,oxidative RNA demethylase activity,metal ion binding	response to hypoxia,DNA dealkylation involved in DNA repair,mRNA processing,mRNA export from nucleus,spermatogenesis,cell differentiation,oxidative single-stranded RNA demethylation
1.16501	0.0120179	0.0176919	Q5T4F4	ZFYVE27	Protrudin	1	nucleoplasm,endoplasmic reticulum,cytosol,integral component of endoplasmic reticulum membrane,axon,dendrite,growth cone membrane,recycling endosome membrane,endoplasmic reticulum tubular network	protein binding,protein self-association,metal ion binding	vesicle-mediated transport,neuron projection development,positive regulation of axon extension,neurotrophin TRK receptor signaling pathway,endoplasmic reticulum tubular network assembly,protein localization to plasma membrane
1.16377	0.0537861	0.057387	Q9H7X7	IFT22	Intraflagellar transport protein 22 homolog	1	centrosome,cilium,intraciliary transport particle B,ciliary tip	GTP binding	intraciliary transport involved in cilium morphogenesis
1.1617	0.000338633	0.000867973	Q8TEX9	IPO4	Importin-4	4	nuclear chromatin,cytoplasm,membrane,nuclear membrane,nuclear periphery,protein complex,nuclear pore	protein binding,nuclear localization sequence binding,Ran GTPase binding,protein transporter activity	protein import into nucleus, translocation,DNA replication-dependent nucleosome assembly,DNA replication-independent nucleosome assembly,NLS-bearing protein import into nucleus,ribosomal protein import into nucleus,protein transport
1.15663	0.0010256	0.00226973	Q8IWV8	UBR2	E3 ubiquitin-protein ligase UBR2	1	ubiquitin ligase complex,chromatin,nucleus,cytoplasm,cytosol	ubiquitin-protein transferase activity,protein binding,zinc ion binding,ubiquitin protein ligase activity,leucine binding	protein polyubiquitination,chromatin silencing,reciprocal meiotic recombination,male meiosis,male meiosis I,spermatogenesis,negative regulation of transposition,negative regulation of TOR signaling,histone H2A ubiquitination,cellular response to leucine,ubiquitin-dependent protein catabolic process via the N-end rule pathway
1.1558	0.000882023	0.0019994	O43347	MSI1	RNA-binding protein Musashi homolog 1	4	nucleus,cytoplasm,polysome	RNA binding,poly(U) RNA binding,identical protein binding	nervous system development
1.15489	0.14814	0.122798	Q1L5Z9	LONRF2	LON peptidase N-terminal domain and RING finger protein 2	1	intracellular	ubiquitin conjugating enzyme binding,metal ion binding,ubiquitin protein ligase activity	protein polyubiquitination,positive regulation of proteasomal ubiquitin-dependent protein catabolic process
1.15287	0.118835	0.104137	P05114	HMGN1	Non-histone chromosomal protein HMG-14	7	chromatin,nucleus,nucleoplasm,cytoplasm	DNA binding,nucleosomal DNA binding	pyrimidine dimer repair by nucleotide-excision repair,transcription-coupled nucleotide-excision repair,chromatin organization,regulation of transcription from RNA polymerase II promoter,response to UV-B,response to UV-C,positive regulation of DNA-templated transcription, elongation,regulation of development, heterochronic,post-embryonic camera-type eye morphogenesis,regulation of epithelial cell …
1.15113	0.00573853	0.00968411	Q15651	HMGN3	High mobility group nucleosome-binding domain-containing protein 3	5	chromatin,nucleoplasm,cytosol	nucleosomal DNA binding,thyroid hormone receptor binding	biological_process,chromatin modification,positive regulation of transcription from RNA polymerase II promoter,regulation of insulin secretion involved in cellular response to glucose stimulus
1.14927	0.0191791	0.0257437	O14545	TRAFD1	TRAF-type zinc finger domain-containing protein 1	1		protein binding,metal ion binding	response to cytokine,negative regulation of innate immune response
1.14721	0.000463203	0.00114049	Q9Y330	ZBTB12	Zinc finger and BTB domain-containing protein 12	7	nucleus	DNA binding,metal ion binding	transcription, DNA-templated,regulation of transcription, DNA-templated
1.1462	5.01576e-19	1.05121e-17	Q99613	EIF3C	Eukaryotic translation initiation factor 3 subunit C	29	cytosol,eukaryotic translation initiation factor 3 complex	RNA binding,protein binding,translation initiation factor binding,translation initiation factor activity	translational initiation,positive regulation of translation,positive regulation of mRNA binding
1.14397	0.126233	0.109063	P09960	LTA4H	Leukotriene A-4 hydrolase	2	extracellular region,nucleus,nucleoplasm,cytoplasm,cytosol,extracellular exosome,tertiary granule lumen,ficolin-1-rich granule lumen	RNA binding,aminopeptidase activity,epoxide hydrolase activity,leukotriene-A4 hydrolase activity,protein binding,peptidase activity,zinc ion binding,peptide binding,metalloaminopeptidase activity	proteolysis,leukotriene metabolic process,leukotriene biosynthetic process,peptide catabolic process,neutrophil degranulation,cellular lipid metabolic process,cellular protein metabolic process
1.14396	0.0602363	0.0624766	P15927	RPA2	Replication protein A 32 kDa subunit	9	nuclear chromosome, telomeric region,chromatin,nucleus,nucleoplasm,DNA replication factor A complex,nuclear body,PML body,chromosome, telomeric region,site of double-strand break	damaged DNA binding,single-stranded DNA binding,protein binding,enzyme binding,protein phosphatase binding,ubiquitin protein ligase binding,protein N-terminus binding,G-rich strand telomeric DNA binding	G1/S transition of mitotic cell cycle,telomere maintenance,double-strand break repair via homologous recombination,DNA replication,transcription-coupled nucleotide-excision repair,base-excision repair,nucleotide-excision repair,nucleotide-excision repair, preincision complex stabilization,nucleotide-excision repair, preincision complex assembly,nucleotide-excision repair, DNA incision, 3'-to lesi…
1.14342	3.71646e-06	1.57764e-05	Q5H9F3	BCORL1	BCL-6 corepressor-like protein 1	23	nucleoplasm,plasma membrane		transcription, DNA-templated,regulation of transcription, DNA-templated,chromatin modification
1.14156	0.0352882	0.0415714	Q86XR8	CEP57	Centrosomal protein of 57 kDa	2	nucleus,Golgi apparatus,centrosome,cytosol,microtubule	protein binding,microtubule binding,fibroblast growth factor binding,protein homodimerization activity,gamma-tubulin binding	protein import into nucleus, translocation,mitotic sister chromatid segregation,G2/M transition of mitotic cell cycle,spermatid development,fibroblast growth factor receptor signaling pathway,regulation of G2/M transition of mitotic cell cycle,microtubule anchoring,protein homooligomerization,ciliary basal body docking
1.14113	2.1009e-10	1.78692e-09	Q9Y5P3	RAI2	Retinoic acid-induced protein 2	8	cellular_component	molecular_function,protein binding	embryo development
1.1402	0.00708899	0.0115309	P41227	NAA10	N-alpha-acetyltransferase 10	8	intracellular,nucleus,nucleolus,cytoplasm,cytosol,membrane,cytosolic ribosome,NatA complex	peptide alpha-N-acetyltransferase activity,protein binding,N-acetyltransferase activity,peptide-serine-N-acetyltransferase activity,peptide-glutamate-N-acetyltransferase activity,acetyltransferase activity,ribosome binding	DNA packaging,protein acetylation,N-terminal protein amino acid acetylation,internal protein amino acid acetylation,N-terminal peptidyl-serine acetylation,N-terminal peptidyl-glutamic acid acetylation,negative regulation of maintenance of mitotic sister chromatid cohesion, centromeric
1.13304	0.0424039	0.0479682	Q9NVP2	ASF1B	Histone chaperone ASF1B	2	nuclear chromatin,nucleoplasm,protein complex	protein binding,histone binding	DNA replication-dependent nucleosome assembly,DNA replication-independent nucleosome assembly,transcription, DNA-templated,regulation of transcription, DNA-templated,multicellular organism development,spermatogenesis,chromatin modification,cell differentiation
1.13096	0.0054018	0.00923384	P61244	MAX	Protein max	3	nuclear chromatin,nucleus,nucleoplasm,cytoplasm,PML body,dendrite,protein-DNA complex,MLL1 complex,RNA polymerase II transcription factor complex	transcription factor activity, RNA polymerase II core promoter sequence-specific,transcriptional repressor activity, RNA polymerase II core promoter proximal region sequence-specific binding,DNA binding,transcription factor activity, sequence-specific DNA binding,transcription cofactor activity,transcription coactivator activity,protein binding,protein complex binding,protein homodimerization act…	G1/S transition of mitotic cell cycle,negative regulation of transcription from RNA polymerase II promoter,transcription from RNA polymerase II promoter,protein complex assembly,cellular response to starvation,response to insulin,response to axon injury,neuron apoptotic process,retina development in camera-type eye,negative regulation of G0 to G1 transition,cellular response to peptide hormone st…
1.12655	0.397272	0.24772	P00441	SOD1	Superoxide dismutase [Cu-Zn]	1	extracellular region,extracellular space,nucleus,nucleoplasm,cytoplasm,mitochondrion,mitochondrial intermembrane space,mitochondrial matrix,lysosome,peroxisome,cytosol,extracellular matrix,dense core granule,cytoplasmic vesicle,dendrite cytoplasm,neuronal cell body,myelin sheath,protein complex,extracellular exosome,axon cytoplasm,plasma membrane	superoxide dismutase activity,copper ion binding,protein binding,zinc ion binding,protein phosphatase 2B binding,identical protein binding,protein homodimerization activity,Rac GTPase binding,chaperone binding	activation of MAPK activity,response to superoxide,ovarian follicle development,positive regulation of cytokine production,placenta development,retina homeostasis,response to amphetamine,myeloid cell homeostasis,platelet degranulation,glutathione metabolic process,superoxide metabolic process,cellular iron ion homeostasis,spermatogenesis,embryo implantation,cell aging,sensory perception of sound,…
1.12545	2.95306e-20	6.73335e-19	P35222	CTNNB1	Catenin beta-1	23	spindle pole,intracellular,nucleus,nucleoplasm,transcription factor complex,nuclear euchromatin,cytoplasm,centrosome,cytosol,plasma membrane,cell-cell junction,adherens junction,cell-cell adherens junction,fascia adherens,bicellular tight junction,focal adhesion,cell cortex,membrane,basolateral plasma membrane,lateral plasma membrane,catenin complex,flotillin complex,Z disc,lamellipodium,cell jun…	RNA polymerase II core promoter proximal region sequence-specific DNA binding,RNA polymerase II transcription factor binding,RNA polymerase II activating transcription factor binding,RNA polymerase II transcription coactivator activity,chromatin binding,transcription factor activity, sequence-specific DNA binding,transcription coactivator activity,signal transducer activity,protein binding,protei…	negative regulation of transcription from RNA polymerase II promoter,embryonic axis specification,cell morphogenesis involved in differentiation,patterning of blood vessels,branching involved in ureteric bud morphogenesis,in utero embryonic development,gastrulation with mouth forming second,cell fate specification,endodermal cell fate commitment,neuron migration,epithelial to mesenchymal transiti…
1.12436	0.150549	0.124332	Q4VC44	FLYWCH1	FLYWCH-type zinc finger-containing protein 1	1	nucleoplasm,cytosol,nuclear body	DNA binding,metal ion binding
1.12207	0.03294	0.0394153	Q7Z7L7	ZER1	Protein zer-1 homolog	2	Cul2-RING ubiquitin ligase complex	ubiquitin-protein transferase activity	protein ubiquitination,regulation of ubiquitin-protein transferase activity
1.12147	0.0176458	0.0241345	Q9HD20	ATP13A1	Manganese-transporting ATPase 13A1	1	endoplasmic reticulum membrane,integral component of plasma membrane,membrane,intracellular membrane-bounded organelle	molecular_function,calcium-transporting ATPase activity,ATP binding,manganese-transporting ATPase activity,metal ion binding	cellular calcium ion homeostasis,biological_process,ion transmembrane transport,calcium ion transmembrane transport,manganese ion transmembrane transport,Requires Ontology
1.12031	0.271718	0.190153	Q9H2U2	PPA2	Inorganic pyrophosphatase 2, mitochondrial	1	mitochondrial matrix,extracellular exosome	magnesium ion binding,inorganic diphosphatase activity,protein serine/threonine phosphatase activity	tRNA aminoacylation for protein translation,protein dephosphorylation,regulation of mitochondrial membrane potential,diphosphate metabolic process
1.11985	0.00434038	0.00771918	Q96SZ6	CDK5RAP1	CDK5 regulatory subunit-associated protein 1	2	cellular_component,mitochondrion	protein kinase binding,protein complex binding,N6-isopentenyladenosine methylthiotransferase activity,metal ion binding,4 iron, 4 sulfur cluster binding	brain development,tRNA methylthiolation,regulation of neuron differentiation,negative regulation of cyclin-dependent protein serine/threonine kinase activity,positive regulation of translational fidelity,positive regulation of mitochondrial translation,mitochondrial tRNA modification
1.1177	0.00436223	0.00774733	Q969V3	NCLN	Nicalin	1	endoplasmic reticulum membrane,membrane,integral component of membrane	protein binding	regulation of signal transduction,protein destabilization,regulation of protein complex assembly
1.11585	1.18318e-05	4.41585e-05	Q9H0S4	DDX47	Probable ATP-dependent RNA helicase DDX47	13	nucleoplasm,nucleolus,cytoplasm,membrane	RNA binding,ATP-dependent RNA helicase activity,protein binding,ATP binding	rRNA processing,mRNA processing,RNA splicing,extrinsic apoptotic signaling pathway via death domain receptors,RNA secondary structure unwinding
1.11223	7.40484e-06	2.92136e-05	Q14689	DIP2A	Disco-interacting protein 2 homolog A	4	nucleus,cell surface	catalytic activity,protein binding	multicellular organism development,metabolic process,negative regulation of gene expression,regulation of apoptotic process
1.11103	1.44598e-15	2.20041e-14	Q86TG7	PEG10	Retrotransposon-derived protein PEG10	20	nucleus,cytoplasm,cytosol	DNA binding,RNA binding,protein binding,zinc ion binding	apoptotic process,cell differentiation,negative regulation of transforming growth factor beta receptor signaling pathway
1.1097	0.221153	0.164025	Q12980	NPRL3	Nitrogen permease regulator 3-like protein	3	lysosomal membrane,Iml1 complex	GTPase activator activity	ventricular septum development,negative regulation of TOR signaling,cellular response to amino acid starvation,aorta morphogenesis,TORC1 signaling,positive regulation of GTPase activity,cardiac muscle tissue development,palate development,regulation of autophagosome assembly
1.10899	2.22095e-05	7.73852e-05	Q9H869	YY1AP1	YY1-associated protein 1	6	fibrillar center,nucleus,nucleoplasm,nucleolus,cytoplasm,Ino80 complex	protein binding	transcription, DNA-templated,regulation of transcription, DNA-templated,cell proliferation,cell differentiation,regulation of cell cycle
1.10682	0.0872683	0.0824407	Q09019	DMWD	Dystrophia myotonica WD repeat-containing protein	1	cellular_component,nucleus,dendrite,perikaryon	molecular_function	protein deubiquitination
1.10586	0.00160447	0.00334464	Q8N543	OGFOD1	Prolyl 3-hydroxylase OGFOD1	4	nucleus,cytosol,cytoplasmic stress granule	iron ion binding,L-ascorbic acid binding,peptidyl-proline dioxygenase activity,peptidyl-proline 3-dioxygenase activity	regulation of translational termination,cell proliferation,protein hydroxylation,peptidyl-proline hydroxylation,stress granule assembly,oxidation-reduction process
1.10389	2.56362e-08	1.58231e-07	Q7L5N1	COPS6	COP9 signalosome complex subunit 6	7	nucleoplasm,cytosol,COP9 signalosome,extracellular exosome	protein binding	protein deneddylation,nucleotide-excision repair, DNA damage recognition,transcription-coupled nucleotide-excision repair,viral process,post-translational protein modification
1.1016	0.0104321	0.0157892	P46783	RPS10	40S ribosomal protein S10	1	nucleoplasm,nucleolus,cytosol,ribosome,focal adhesion,membrane,cytosolic small ribosomal subunit,extracellular matrix,extracellular exosome	RNA binding,structural constituent of ribosome,protein binding	ribosomal small subunit assembly,nuclear-transcribed mRNA catabolic process, nonsense-mediated decay,rRNA processing,translation,translational initiation,SRP-dependent cotranslational protein targeting to membrane,viral transcription
1.10145	0.0438003	0.0491271	Q99941	ATF6B	Cyclic AMP-dependent transcription factor ATF-6 beta	3	intracellular,nucleus,nucleolus,endoplasmic reticulum membrane,Golgi apparatus,integral component of endoplasmic reticulum membrane,protein-DNA complex,RNA polymerase II transcription factor complex	transcription factor activity, sequence-specific DNA binding,protein binding,cAMP response element binding,transcription regulatory region DNA binding,RNA polymerase II distal enhancer sequence-specific DNA binding,transcriptional activator activity, RNA polymerase II distal enhancer sequence-specific binding	transcription, DNA-templated,transcription from RNA polymerase II promoter,signal transduction,ATF6-mediated unfolded protein response,positive regulation of transcription from RNA polymerase II promoter,positive regulation of transcription from RNA polymerase II promoter in response to endoplasmic reticulum stress
1.10071	0.321689	0.213669	Q13151	HNRNPA0	Heterogeneous nuclear ribonucleoprotein A0	9	nucleus,nucleoplasm,intracellular ribonucleoprotein complex	RNA binding,AU-rich element binding,protein kinase binding	mRNA splicing, via spliceosome,mRNA processing,inflammatory response,RNA metabolic process,response to lipopolysaccharide,3'-UTR-mediated mRNA stabilization
1.10013	0.000300782	0.000785039	Q8NBU5	ATAD1	ATPase family AAA domain-containing protein 1	3	nucleus,mitochondrion,peroxisomal membrane,membrane,cell junction,postsynaptic membrane	ATP binding,ATPase activity	positive regulation of receptor internalization,learning,memory,negative regulation of synaptic transmission, glutamatergic
1.09904	7.41687e-09	4.94929e-08	Q9H040	SPRTN	SprT-like domain-containing protein Spartan	6	nucleus,nucleoplasm,chromosome,nuclear speck	DNA binding,protein binding,ubiquitin binding,metal ion binding,K63-linked polyubiquitin binding	cellular response to DNA damage stimulus,response to UV,translesion synthesis,positive regulation of protein ubiquitination,error-free translesion synthesis
1.09725	0.00418174	0.00748076	O00716	E2F3	Transcription factor E2F3	7	nucleoplasm,RNA polymerase II transcription factor complex	core promoter binding,transcriptional activator activity, RNA polymerase II transcription regulatory region sequence-specific binding,transcription factor activity, sequence-specific DNA binding,protein binding,sequence-specific DNA binding,protein dimerization activity,RNA polymerase II regulatory region sequence-specific DNA binding	transcription initiation from RNA polymerase II promoter,cell cycle,positive regulation of cell proliferation,positive regulation of transcription from RNA polymerase II promoter,negative regulation of fat cell proliferation,positive regulation of vascular associated smooth muscle cell apoptotic process
1.09707	1.59785e-10	1.37916e-09	Q8IWZ6	BBS7	Bardet-Biedl syndrome 7 protein	11	photoreceptor outer segment,nucleus,centrosome,cytosol,axoneme,membrane,BBSome,ciliary basal body,ciliary membrane	RNA polymerase II repressing transcription factor binding,protein binding	eye development,heart looping,regulation of transcription from RNA polymerase II promoter,smoothened signaling pathway,determination of left/right symmetry,brain development,visual perception,protein localization,protein transport,melanosome transport,positive regulation of proteasomal ubiquitin-dependent protein catabolic process,fat cell differentiation,intracellular transport,digestive tract m…
1.09575	0.0155475	0.0218363	Q9BWN1	PRR14	Proline-rich protein 14	2	nuclear lamina,nucleoplasm,chromosome	protein binding	muscle organ development
1.09159	0.0873684	0.0824818	P42574	CASP3	Caspase-3	5	nucleus,nucleoplasm,cytosol,plasma membrane,death-inducing signaling complex,membrane raft	protease binding,aspartic-type endopeptidase activity,cysteine-type endopeptidase activity,cyclin-dependent protein serine/threonine kinase inhibitor activity,death receptor binding,protein binding,peptidase activity,cysteine-type endopeptidase activator activity involved in apoptotic process,phospholipase A2 activator activity,protein complex binding,cysteine-type endopeptidase activity involved…	response to hypoxia,B cell homeostasis,apoptotic DNA fragmentation,proteolysis,apoptotic process,activation of cysteine-type endopeptidase activity involved in apoptotic process,cellular response to DNA damage stimulus,heart development,sensory perception of sound,learning or memory,intrinsic apoptotic signaling pathway in response to osmotic stress,activation of cysteine-type endopeptidase activ…
1.09066	0.00777031	0.012441	O60930	RNASEH1	Ribonuclease H1	1	nucleus,cytoplasm	magnesium ion binding,nucleic acid binding,RNA binding,RNA-DNA hybrid ribonuclease activity,ribonuclease activity	RNA catabolic process,DNA replication, removal of RNA primer,RNA phosphodiester bond hydrolysis, endonucleolytic
1.09024	7.38865e-06	2.91712e-05	Q9H0A8	COMMD4	COMM domain-containing protein 4	5	nucleus,cytoplasm	protein binding	transcription, DNA-templated,regulation of transcription, DNA-templated
1.08771	0.0160966	0.0224098	Q9P2P1	NYNRIN	Protein NYNRIN	8	cellular_component,integral component of membrane	molecular_function,nucleic acid binding	biological_process,DNA integration
1.08691	0.138993	0.117039	P52655	GTF2A1	Transcription initiation factor IIA subunit 1	1	nucleoplasm,transcription factor TFIID complex,transcription factor TFIIA complex,cytosol	RNA polymerase II repressing transcription factor binding,DNA binding,transcription coactivator activity,protein binding,transcription factor binding,TBP-class protein binding,protein heterodimerization activity	regulation of transcription, DNA-templated,transcription from RNA polymerase II promoter,transcription initiation from RNA polymerase II promoter,transcription elongation from RNA polymerase II promoter,snRNA transcription from RNA polymerase II promoter
1.08468	7.57703e-12	7.70918e-11	O94782	USP1	Ubiquitin carboxyl-terminal hydrolase 1	18	nucleus,nucleoplasm	cysteine-type endopeptidase activity,thiol-dependent ubiquitin-specific protease activity,protein binding,peptidase activity,thiol-dependent ubiquitinyl hydrolase activity	skeletal system development,regulation of DNA repair,ubiquitin-dependent protein catabolic process,response to UV,protein deubiquitination,monoubiquitinated protein deubiquitination,interstrand cross-link repair,DNA damage response, detection of DNA damage
1.08226	0.060364	0.0625564	P41182	BCL6	B-cell lymphoma 6 protein	1	nucleus,nucleoplasm,Golgi apparatus,replication fork	RNA polymerase II regulatory region sequence-specific DNA binding,intronic transcription regulatory region sequence-specific DNA binding,transcriptional repressor activity, RNA polymerase II transcription regulatory region sequence-specific binding,chromatin binding,transcription factor activity, sequence-specific DNA binding,protein binding,chromatin DNA binding,identical protein binding,sequenc…	protein import into nucleus, translocation,negative regulation of transcription from RNA polymerase II promoter,cell morphogenesis,negative regulation of cell-matrix adhesion,germinal center formation,regulation of germinal center formation,negative regulation of B cell apoptotic process,transcription, DNA-templated,inflammatory response,cellular response to DNA damage stimulus,Rho protein signal…
1.08063	3.9408e-09	2.73395e-08	Q86XI2	NCAPG2	Condensin-2 complex subunit G2	11	condensin complex,nucleoplasm,membrane,nuclear speck	methylated histone binding	inner cell mass cell proliferation,cell cycle,chromosome condensation,cell division
1.0799	0.000165353	0.000460228	Q9NSG2	C1orf112	Uncharacterized protein C1orf112	6
1.07483	0.0229331	0.02966	Q5VTE6	ANGEL2	Protein angel homolog 2	4	cytoplasm,Cajal body	mRNA 3'-UTR binding	negative regulation of mitotic cell cycle,3'-UTR-mediated mRNA stabilization
1.07313	0.00553466	0.00940503	P60981	DSTN	Destrin	2	actin cytoskeleton,cortical actin cytoskeleton,extracellular exosome	protein binding,actin filament binding	actin polymerization or depolymerization,actin filament depolymerization,actin filament fragmentation,positive regulation of actin filament depolymerization,actin filament severing
1.06794	0.00654984	0.0108083	Q92804	TAF15	TATA-binding protein-associated factor 2N	9	nucleus,nucleoplasm,cytoplasm,nucleolus	DNA binding,RNA binding,protein binding,metal ion binding	positive regulation of transcription, DNA-templated
1.06413	0.0242748	0.0310125	Q9BQ67	GRWD1	Glutamate-rich WD repeat-containing protein 1	3	nucleus,chromosome,nucleolus,cytosol,protein complex	chromatin binding,DNA replication origin binding,RNA binding,protein binding,histone binding	DNA replication,nucleosome assembly,nucleosome disassembly
1.06344	0.960892	0.438753	Q9HC36	RNMTL1	rRNA methyltransferase 3, mitochondrial	1	mitochondrion,mitochondrial matrix	RNA binding,protein binding,rRNA (guanosine-2'-O-)-methyltransferase activity	rRNA 2'-O-methylation
1.06052	0.287386	0.197613	Q684P5	RAP1GAP2	Rap1 GTPase-activating protein 2	3	centrosome,cytosol,plasma membrane,nuclear membrane,neuron projection,perinuclear region of cytoplasm	GTPase activator activity,protein binding	regulation of cell size,negative regulation of neuron projection development,positive regulation of GTPase activity,regulation of small GTPase mediated signal transduction
1.06007	0.000258225	0.000683651	P08195	SLC3A2	4F2 cell-surface antigen heavy chain	3	nucleus,cytosol,plasma membrane,cell surface,membrane,integral component of membrane,apical plasma membrane,melanosome,extracellular exosome	RNA binding,double-stranded RNA binding,catalytic activity,calcium:sodium antiporter activity,protein binding,neutral amino acid transmembrane transporter activity,cadherin binding	carbohydrate metabolic process,calcium ion transport,amino acid transport,tryptophan transport,cell growth,sodium ion transmembrane transport,response to exogenous dsRNA,leukocyte migration,leucine import,L-alpha-amino acid transmembrane transport
1.05711	0.00526042	0.0090363	Q9NRX1	PNO1	RNA-binding protein PNO1	5	nucleus,nucleoplasm,nucleolus,cytosol	RNA binding	rRNA processing
1.05509	0.000467652	0.00114983	Q8IYW5	RNF168	E3 ubiquitin-protein ligase RNF168	2	ubiquitin ligase complex,nucleus,nucleoplasm,cytosol,site of double-strand break,protein complex	chromatin binding,ubiquitin-protein transferase activity,protein binding,nucleosome binding,histone binding,ubiquitin binding,metal ion binding,K63-linked polyubiquitin binding	double-strand break repair,double-strand break repair via nonhomologous end joining,ubiquitin-dependent protein catabolic process,cellular response to DNA damage stimulus,response to ionizing radiation,protein ubiquitination,negative regulation of transcription elongation from RNA polymerase II promoter,histone H2A monoubiquitination,interstrand cross-link repair,histone H2A-K13 ubiquitination,hi…
1.05232	0.000858315	0.00195643	Q86Y56	DNAAF5	Dynein assembly factor 5, axonemal	4	cytoplasm,motile cilium	dynein intermediate chain binding	cilium movement,outer dynein arm assembly,inner dynein arm assembly
1.04954	0.000762027	0.00176162	Q7Z4H3	HDDC2	HD domain-containing protein 2	1	mitochondrion,extracellular exosome	protein binding
1.04925	0.447611	0.268789	Q9Y294	ASF1A	Histone chaperone ASF1A	3	nuclear chromatin,nucleus,nucleoplasm,protein complex	chromatin binding,protein binding,histone binding	osteoblast differentiation,DNA repair,nucleosome assembly,DNA replication-dependent nucleosome assembly,DNA replication-independent nucleosome assembly,transcription, DNA-templated,chromatin modification,negative regulation of chromatin silencing,muscle cell differentiation
1.04896	1.53399e-05	5.55508e-05	Q6IQ32	ADNP2	ADNP homeobox protein 2	9	cellular_component,nucleus	molecular_function,DNA binding,protein binding,metal ion binding	transcription, DNA-templated,regulation of transcription, DNA-templated,neuron differentiation,positive regulation of cell growth,cellular response to oxidative stress,negative regulation of cell death,cellular response to retinoic acid
1.04888	0.000698144	0.00163719	Q8N8A6	DDX51	ATP-dependent RNA helicase DDX51	2	nucleolus,cytoplasm,membrane	RNA binding,ATP-dependent RNA helicase activity,ATP binding	rRNA processing,RNA secondary structure unwinding
1.04538	0.00268532	0.00518545	Q5W0Q7	USPL1	SUMO-specific isopeptidase USPL1	2	extracellular space,Cajal body	protein binding,SUMO binding,SUMO-specific isopeptidase activity,ubiquitin binding	cell proliferation,protein desumoylation,Cajal body organization
1.04508	0.000182669	0.000501838	P04626	ERBB2	Receptor tyrosine-protein kinase erbB-2	6	nucleus,cytosol,plasma membrane,endosome membrane,integral component of membrane,basolateral plasma membrane,apical plasma membrane,myelin sheath,receptor complex,perinuclear region of cytoplasm	RNA polymerase I core binding,protein tyrosine kinase activity,transmembrane receptor protein tyrosine kinase activity,receptor signaling protein tyrosine kinase activity,transmembrane signaling receptor activity,Ras guanyl-nucleotide exchange factor activity,protein binding,ATP binding,protein C-terminus binding,protein phosphatase binding,identical protein binding,ErbB-3 class receptor binding,…	MAPK cascade,positive regulation of protein phosphorylation,transcription, DNA-templated,regulation of transcription from RNA polymerase II promoter,protein phosphorylation,signal transduction,cell surface receptor signaling pathway,enzyme linked receptor protein signaling pathway,transmembrane receptor protein tyrosine kinase signaling pathway,peripheral nervous system development,heart developm…
1.0441	0.185491	0.144351	Q9NR33	POLE4	DNA polymerase epsilon subunit 4	1	nucleus,nucleoplasm,Ada2/Gcn5/Ada3 transcription activator complex,epsilon DNA polymerase complex	DNA binding,DNA-directed DNA polymerase activity,protein binding,protein heterodimerization activity	G1/S transition of mitotic cell cycle,DNA replication initiation,telomere maintenance via semi-conservative replication,histone H3 acetylation,DNA biosynthetic process
1.04233	0.000412879	0.00103257	Q8NFH4	NUP37	Nucleoporin Nup37	2	condensed chromosome kinetochore,nucleus,nuclear envelope,nucleoplasm,cytosol,nuclear pore outer ring,host cell,kinetochore	protein binding	regulation of glycolytic process,mRNA export from nucleus,tRNA export from nucleus,sister chromatid cohesion,mitotic nuclear envelope disassembly,viral process,protein sumoylation,viral transcription,cell division,regulation of gene silencing by miRNA,intracellular transport of virus,regulation of cellular response to heat
1.04115	0.0345193	0.040865	Q969R8	ITFG2	Integrin-alpha FG-GAP repeat-containing protein 2	1	nucleoplasm,lysosomal membrane,cytosol,Requires Ontology		germinal center B cell differentiation,cellular response to amino acid starvation,cellular response to glucose starvation,negative regulation of TORC1 signaling
1.04074	1.16324e-06	5.42484e-06	P12757	SKIL	Ski-like protein	9	acrosomal vesicle,nucleoplasm,protein complex	RNA polymerase II core promoter proximal region sequence-specific DNA binding,transcriptional repressor activity, RNA polymerase II core promoter proximal region sequence-specific binding,chromatin binding,protein binding,SMAD binding	negative regulation of transcription from RNA polymerase II promoter,blastocyst formation,lymphocyte homeostasis,cell cycle arrest,transforming growth factor beta receptor signaling pathway,spermatogenesis,negative regulation of transforming growth factor beta receptor signaling pathway,negative regulation of BMP signaling pathway,response to cytokine,negative regulation of cell differentiation,n…
1.03874	0.00331957	0.00619158	Q9H9Y4	GPN2	GPN-loop GTPase 2	2	cellular_component,cytoplasm	molecular_function,GTPase activity,GTP binding	biological_process,RNA polymerase II complex import to nucleus,RNA polymerase III complex localization to nucleus
1.03609	6.69848e-07	3.263e-06	Q9NVN8	GNL3L	Guanine nucleotide-binding protein-like 3-like protein	7	nucleus,nucleolus,cytosol,membrane,telomerase holoenzyme complex	RNA binding,GTPase activity,protein binding,GTP binding	negative regulation of protein ubiquitination,regulation of protein stability,negative regulation of protein binding,negative regulation of telomere maintenance via telomerase,negative regulation of protein sumoylation,ribosome biogenesis,positive regulation of protein homodimerization activity,positive regulation of protein localization to chromosome, telomeric region
1.03201	5.15684e-05	0.000163413	P31939	ATIC	Bifunctional purine biosynthesis protein PURH	3	mitochondrion,cytosol,plasma membrane,membrane,extracellular exosome	IMP cyclohydrolase activity,phosphoribosylaminoimidazolecarboxamide formyltransferase activity,protein homodimerization activity,cadherin binding	brainstem development,nucleobase-containing compound metabolic process,'de novo' IMP biosynthetic process,nucleoside metabolic process,purine ribonucleoside monophosphate biosynthetic process,response to inorganic substance,cerebellum development,cerebral cortex development,animal organ regeneration,dihydrofolate metabolic process,tetrahydrofolate biosynthetic process
1.03053	0.00230985	0.00457138	Q92562	FIG4	Polyphosphoinositide phosphatase	1	Golgi membrane,endoplasmic reticulum,lipid particle,endosome membrane,early endosome membrane,late endosome membrane,intracellular membrane-bounded organelle,recycling endosome	phosphatidylinositol-3-phosphatase activity,protein binding,phosphatidylinositol-4-phosphate phosphatase activity,phosphatidylinositol-3,5-bisphosphate 5-phosphatase activity	phosphatidylinositol biosynthetic process,vacuole organization,locomotory behavior,positive regulation of neuron projection development,dephosphorylation,negative regulation of myelination,myelin assembly,phosphatidylinositol-3-phosphate biosynthetic process,pigmentation,neuron development
1.02735	0.00571545	0.00965448	P31943	HNRNPH1	Heterogeneous nuclear ribonucleoprotein H	14	nucleus,nucleoplasm,cytosol,membrane,catalytic step 2 spliceosome	RNA binding,protein binding,poly(U) RNA binding	mRNA splicing, via spliceosome,RNA processing,fibroblast growth factor receptor signaling pathway,RNA metabolic process,regulation of RNA splicing
1.02555	0.0102854	0.0156109	Q66K64	DCAF15	DDB1- and CUL4-associated factor 15	2	protein complex,Cul4-RING E3 ubiquitin ligase complex	protein binding	protein ubiquitination
1.02338	0.00126031	0.00272457	Q9Y5A7	NUB1	NEDD8 ultimate buster 1	6	nucleus,cytosol	protein binding	ubiquitin-dependent protein catabolic process,protein ubiquitination,positive regulation of proteasomal ubiquitin-dependent protein catabolic process,response to interferon-gamma,response to tumor necrosis factor,post-translational protein modification
1.02018	1.48107e-15	2.24891e-14	A0AVK6	E2F8	Transcription factor E2F8	17	nucleus,nucleoplasm,transcription factor complex,nucleolus,cytosol	RNA polymerase II core promoter proximal region sequence-specific DNA binding,core promoter binding,transcriptional repressor activity, RNA polymerase II core promoter proximal region sequence-specific binding,transcription factor activity, sequence-specific DNA binding,transcription corepressor activity,protein binding,protein homodimerization activity	negative regulation of transcription from RNA polymerase II promoter,placenta development,sprouting angiogenesis,transcription, DNA-templated,DNA damage response, signal transduction by p53 class mediator resulting in cell cycle arrest,cell proliferation,negative regulation of cytokinesis,positive regulation of DNA endoreduplication,cell cycle comprising mitosis without cytokinesis,positive regul…
1.01866	7.91595e-05	0.000239153	P60174	TPI1	Triosephosphate isomerase	5	extracellular space,nucleus,cytosol,extracellular exosome	triose-phosphate isomerase activity,protein binding,ubiquitin protein ligase binding	gluconeogenesis,glycolytic process,pentose-phosphate shunt,multicellular organism development,glycerol catabolic process,glyceraldehyde-3-phosphate biosynthetic process,canonical glycolysis
1.01698	7.18162e-06	2.84304e-05	Q9UJA3	MCM8	DNA helicase MCM8	6	nucleoplasm,MCM8-MCM9 complex	DNA binding,helicase activity,protein binding,ATP binding	G1/S transition of mitotic cell cycle,double-strand break repair via homologous recombination,DNA replication,DNA replication initiation,cellular response to DNA damage stimulus,female gamete generation,male gamete generation
1.01648	0.00840035	0.0132599	Q71SY5	MED25	Mediator of RNA polymerase II transcription subunit 25	1	nucleoplasm,nuclear transcription factor complex	protein binding,transcription factor binding,retinoic acid receptor binding,retinoid X receptor binding	negative regulation of transcription from RNA polymerase II promoter,transcription initiation from RNA polymerase II promoter,positive regulation of chromatin binding,positive regulation of transcription from RNA polymerase II promoter,negative regulation of fibroblast proliferation,positive regulation of cell cycle arrest,positive regulation of mediator complex assembly
1.01573	1.95087e-05	6.90749e-05	Q9NQZ2	UTP3	Something about silencing protein 10	7	nucleus,nucleoplasm,nucleolus,small-subunit processome	RNA binding,protein binding	maturation of SSU-rRNA from tricistronic rRNA transcript (SSU-rRNA, 5.8S rRNA, LSU-rRNA),rRNA processing,brain development,chromatin modification
1.01555	1.06791e-08	6.99285e-08	P62269	RPS18	40S ribosomal protein S18	6	nucleus,nucleoplasm,cytosol,ribosome,focal adhesion,small ribosomal subunit,membrane,cytosolic small ribosomal subunit,extracellular matrix,extracellular exosome	RNA binding,structural constituent of ribosome,protein binding,rRNA binding	nuclear-transcribed mRNA catabolic process, nonsense-mediated decay,rRNA processing,translation,translational initiation,SRP-dependent cotranslational protein targeting to membrane,viral transcription,ribosome biogenesis
1.01538	0.752102	0.37721	Q9NZT1	CALML5	Calmodulin-like protein 5	2	extracellular region,extracellular exosome,ficolin-1-rich granule lumen	calcium ion binding	signal transduction,epidermis development,neutrophil degranulation
1.0149	0.000730219	0.00169931	Q14596	NBR1	Next to BRCA1 gene 1 protein	7	pre-autophagosomal structure,nucleoplasm,lysosome,late endosome,autophagosome,cytosol,membrane,nuclear body,M band,intracellular membrane-bounded organelle,extracellular exosome,mitochondrion	protein binding,zinc ion binding,ubiquitin binding,mitogen-activated protein kinase binding	macroautophagy,regulation of bone mineralization,regulation of stress-activated MAPK cascade,negative regulation of osteoblast differentiation,protein oligomerization
1.0142	0.00338877	0.00629214	P78411	IRX5	Iroquois-class homeodomain protein IRX-5	1	nucleus	vitamin D binding,sequence-specific DNA binding	regulation of heart rate,transcription, DNA-templated,regulation of transcription, DNA-templated,visual perception,gonad development,neuron maturation,embryonic cranial skeleton morphogenesis,response to stimulus,retinal bipolar neuron differentiation
1.01221	0.0016142	0.00336079	O95260	ATE1	Arginyl-tRNA--protein transferase 1	1	nucleus,cytoplasm	arginyltransferase activity,protein binding	proteasomal protein catabolic process,protein arginylation
1.01219	0.110895	0.0987992	O75145	PPFIA3	Liprin-alpha-3	1	acrosomal vesicle,cytosol,presynaptic active zone,epididymosome	protein binding	neurotransmitter secretion,glutamate secretion,regulation of short-term neuronal synaptic plasticity
1.00925	0.679195	0.352776	Q9UL49	TCFL5	Transcription factor-like 5 protein	1	male germ cell nucleus,nucleus	RNA polymerase II core promoter proximal region sequence-specific DNA binding,transcriptional repressor activity, RNA polymerase II core promoter proximal region sequence-specific binding,DNA binding,transcription factor activity, sequence-specific DNA binding,protein dimerization activity	negative regulation of transcription from RNA polymerase II promoter,regulation of transcription, DNA-templated,transcription from RNA polymerase II promoter,multicellular organism development,spermatogenesis,cell differentiation,regulation of cell proliferation,regulation of cell differentiation
1.00913	3.70918e-10	3.03675e-09	Q3T8J9	GON4L	GON-4-like protein	33	nucleus,nucleoplasm,nuclear body	DNA binding,transcription corepressor activity	transcription, DNA-templated,B cell differentiation,negative regulation of transcription, DNA-templated
1.00638	0.00237562	0.00466766	Q9UM11	FZR1	Fizzy-related protein homolog	1	nucleoplasm,cytosol,nuclear membrane,anaphase-promoting complex	protein binding,anaphase-promoting complex binding,ubiquitin-protein transferase activator activity	DNA repair,positive regulation of cell proliferation,anaphase-promoting complex-dependent catabolic process,regulation of meiotic nuclear division,protein ubiquitination involved in ubiquitin-dependent protein catabolic process,positive regulation of protein catabolic process,cell division,negative regulation of ubiquitin-protein ligase activity involved in mitotic cell cycle,positive regulation …
1.00621	0.0431325	0.0485571	Q8TEY7	USP33	Ubiquitin carboxyl-terminal hydrolase 33	2	nucleoplasm,cytoplasm,Golgi apparatus,centrosome,cytosol,focal adhesion,VCB complex,cell body,perinuclear region of cytoplasm,autophagosome	G-protein coupled receptor binding,cysteine-type endopeptidase activity,thiol-dependent ubiquitin-specific protease activity,protein binding,zinc ion binding,Ral GTPase binding,thiol-dependent ubiquitinyl hydrolase activity,ubiquitin binding	ubiquitin-dependent protein catabolic process,endocytosis,axon guidance,regulation of G-protein coupled receptor protein signaling pathway,cellular response to starvation,regulation of autophagy,cell migration,protein deubiquitination,negative regulation of protein binding,positive regulation of protein binding,protein stabilization,centrosome duplication,protein K63-linked deubiquitination,prote…
1.00619	0.00210474	0.00422638	Q99536	VAT1	Synaptic vesicle membrane protein VAT-1 homolog	2	extracellular region,mitochondrial outer membrane,integral component of membrane,azurophil granule lumen,extracellular exosome	zinc ion binding,oxidoreductase activity	negative regulation of mitochondrial fusion,neutrophil degranulation,oxidation-reduction process
1.00428	7.66215e-13	8.9841e-12	Q9BVQ7	SPATA5L1	Spermatogenesis-associated protein 5-like protein 1	12	cytoplasm	ATP binding
1.00281	0.1034	0.0936108	P17509	HOXB6	Homeobox protein Hox-B6	1	nucleus	transcription factor activity, sequence-specific DNA binding,RNA binding,protein binding,sequence-specific DNA binding	transcription, DNA-templated,regulation of transcription, DNA-templated,anterior/posterior pattern specification,erythrocyte homeostasis,embryonic skeletal system morphogenesis
1.00235	0.126898	0.109483	Q6PHR2	ULK3	Serine/threonine-protein kinase ULK3	1	pre-autophagosomal structure,cytoplasm,ciliary tip	protein serine/threonine kinase activity,protein binding,ATP binding	autophagy,negative regulation of smoothened signaling pathway,positive regulation of smoothened signaling pathway,protein autophosphorylation,cellular senescence
1.00069	0.139092	0.117109	Q9H4A4	RNPEP	Aminopeptidase B	1	extracellular region,plasma membrane,secretory granule,extracellular exosome	aminopeptidase activity,epoxide hydrolase activity,metalloexopeptidase activity,zinc ion binding,peptide binding,metalloaminopeptidase activity	proteolysis,peptide catabolic process,negative regulation of blood pressure
0.999375	0.366566	0.234142	Q92664	GTF3A	Transcription factor IIIA	1	nucleus,nucleoplasm	DNA binding,5S rRNA binding,metal ion binding	regulation of transcription, DNA-templated,transcription from RNA polymerase III promoter,rRNA transcription,ribosomal large subunit biogenesis
0.998285	0.410766	0.253403	Q6ZN18	AEBP2	Zinc finger protein AEBP2	1	nucleus,nucleoplasm,ESC/E(Z) complex	RNA polymerase II core promoter proximal region sequence-specific DNA binding,transcriptional repressor activity, RNA polymerase II core promoter proximal region sequence-specific binding,transcription corepressor activity,metal ion binding	negative regulation of transcription from RNA polymerase II promoter,transcription, DNA-templated,chromatin modification,negative regulation of gene expression, epigenetic
0.998004	9.68671e-07	4.61141e-06	Q6P1K2	PMF1	Polyamine-modulated factor 1	10	MIS12/MIND type complex,condensed chromosome kinetochore,nucleoplasm,transcription factor complex,Golgi apparatus,cytosol,intracellular membrane-bounded organelle	transcription coactivator activity,protein binding,leucine zipper domain binding	regulation of transcription, DNA-templated,transcription from RNA polymerase II promoter,chromosome segregation,sister chromatid cohesion,cell division
0.997972	0.15183	0.125051	Q9H2G9	BLZF1	Golgin-45	1	Golgi membrane,nucleus,cytoplasm,Golgi apparatus,Golgi lumen	DNA binding,transcription factor activity, sequence-specific DNA binding,protein binding,enzyme binding,ubiquitin protein ligase binding	regulation of cell growth,regulation of transcription from RNA polymerase II promoter,Golgi organization,cell proliferation,Golgi to plasma membrane protein transport
0.997862	0.00410325	0.00736481	Q86Y13	DZIP3	E3 ubiquitin-protein ligase DZIP3	3	Hrd1p ubiquitin ligase complex,cytoplasm,Derlin-1 retrotranslocation complex,endoplasmic reticulum quality control compartment	RNA binding,ubiquitin-protein transferase activity,protein binding,phosphatase binding,polyubiquitin binding,metal ion binding,unfolded protein binding,ubiquitin protein ligase activity involved in ERAD pathway,ubiquitin-specific protease binding	protein polyubiquitination,ER-associated ubiquitin-dependent protein catabolic process,endoplasmic reticulum unfolded protein response,protein ubiquitination involved in ubiquitin-dependent protein catabolic process
0.997487	0.321094	0.213371	Q8WUH2	TGFBRAP1	Transforming growth factor-beta receptor-associated protein 1	1	early endosome,membrane,CORVET complex,intracellular membrane-bounded organelle	transforming growth factor beta receptor binding,protein binding,SMAD binding	regulation of transcription, DNA-templated,intracellular protein transport,signal transduction,transforming growth factor beta receptor signaling pathway,endosome to lysosome transport,endosomal vesicle fusion
0.996991	0.0185403	0.025069	Q96EU6	RRP36	Ribosomal RNA processing protein 36 homolog	5	nucleus,nucleoplasm,nucleolus,90S preribosome	RNA binding	maturation of SSU-rRNA from tricistronic rRNA transcript (SSU-rRNA, 5.8S rRNA, LSU-rRNA),cleavage involved in rRNA processing,rRNA processing,ribosomal small subunit biogenesis
0.996458	6.35138e-06	2.54929e-05	Q5T9L3	WLS	Protein wntless homolog	2	Golgi membrane,early endosome,endoplasmic reticulum membrane,Golgi apparatus,trans-Golgi network,plasma membrane,integral component of membrane,endocytic vesicle membrane,cytoplasmic vesicle,early endosome membrane,dendrite membrane,dendrite cytoplasm,extracellular exosome	signal transducer activity,protein binding,Wnt-protein binding,mu-type opioid receptor binding	mesoderm formation,intracellular protein transport,anterior/posterior axis specification,Wnt signaling pathway,positive regulation of Wnt signaling pathway,midbrain development,hindbrain development,exocrine pancreas development,positive regulation of I-kappaB kinase/NF-kappaB signaling,Wnt protein secretion,positive regulation of Wnt protein secretion,positive regulation of canonical Wnt signali…
0.994686	0.0812549	0.078291	O43818	RRP9	U3 small nucleolar RNA-interacting protein 2	7	nucleoplasm,nucleolus,box C/D snoRNP complex,small-subunit processome	RNA binding,U3 snoRNA binding	rRNA processing
0.993991	1.54387e-14	2.13579e-13	Q9NWK9	ZNHIT6	Box C/D snoRNA protein 1	18	extracellular exosome,pre-snoRNP complex	TFIID-class transcription factor binding,protein binding,enzyme binding,identical protein binding,metal ion binding,ATPase binding	box C/D snoRNP assembly,ribosome biogenesis,snoRNA localization,protein oligomerization
0.991562	0.0373357	0.0434425	P30044	PRDX5	Peroxiredoxin-5, mitochondrial	3	extracellular space,nucleus,cytoplasm,mitochondrion,mitochondrial matrix,peroxisome,peroxisomal matrix,cytosol,cytoplasmic vesicle,intracellular membrane-bounded organelle,perinuclear region of cytoplasm,extracellular exosome	RNA polymerase III regulatory region DNA binding,peroxidase activity,receptor binding,thioredoxin peroxidase activity,cysteine-type endopeptidase inhibitor activity involved in apoptotic process,protein dimerization activity	apoptotic process,inflammatory response,response to oxidative stress,negative regulation of transcription from RNA polymerase III promoter,cellular response to oxidative stress,cellular response to reactive oxygen species,negative regulation of apoptotic process,negative regulation of cysteine-type endopeptidase activity involved in apoptotic process,cell redox homeostasis,oxidation-reduction pro…
0.989391	2.63746e-06	1.15101e-05	Q9BVW5	TIPIN	TIMELESS-interacting protein	4	nuclear chromatin,nucleus,nucleoplasm,cytoplasm,replication fork protection complex,intracellular membrane-bounded organelle	DNA binding,protein binding	DNA replication checkpoint,DNA replication,positive regulation of cell proliferation,response to UV,intra-S DNA damage checkpoint,regulation of nuclear cell cycle DNA replication,replication fork arrest,cell cycle phase transition,replication fork protection,cell division
0.984335	0.0714775	0.0709504	Q8TD10	MIPOL1	Mirror-image polydactyly gene 1 protein	3	nucleus	protein binding,identical protein binding
0.983766	0.0110607	0.0165509	P49321	NASP	Nuclear autoantigenic sperm protein	44	nuclear chromatin,nucleus,nucleoplasm,cytoplasm,protein complex	protein binding,histone binding,Hsp90 protein binding	blastocyst development,DNA replication,DNA replication-dependent nucleosome assembly,DNA replication-independent nucleosome assembly,cell cycle,cell proliferation,male gonad development,protein transport,response to testosterone,histone exchange
0.982747	3.05229e-09	2.16255e-08	P39656	DDOST	Dolichyl-diphosphooligosaccharide--protein glycosyltransferase 48 kDa subunit	4	endoplasmic reticulum,endoplasmic reticulum membrane,plasma membrane,oligosaccharyltransferase complex,membrane,integral component of membrane,azurophil granule membrane,intracellular membrane-bounded organelle,protein complex	protein binding,oligosaccharyl transferase activity,dolichyl-diphosphooligosaccharide-protein glycotransferase activity	protein glycosylation,protein N-linked glycosylation,protein N-linked glycosylation via asparagine,response to cytokine,T cell activation,neutrophil degranulation
0.982457	0.145733	0.121372	Q8NFH5	NUP35	Nucleoporin NUP53	1	nuclear envelope,nuclear lamina,nucleoplasm,plasma membrane,nuclear membrane,host cell,nuclear pore central transport channel,nuclear pore nuclear basket	single-stranded DNA binding,nucleocytoplasmic transporter activity,protein binding,phospholipid binding	regulation of glycolytic process,regulation of transcription, DNA-templated,mRNA export from nucleus,tRNA export from nucleus,NLS-bearing protein import into nucleus,nuclear pore organization,mitotic nuclear envelope disassembly,viral process,protein sumoylation,viral transcription,regulation of gene silencing by miRNA,intracellular transport of virus,regulation of cellular response to heat
0.981386	0.146008	0.121529	P20248	CCNA2	Cyclin-A2	4	cyclin-dependent protein kinase holoenzyme complex,female pronucleus,male pronucleus,nucleus,nucleoplasm,cytoplasm,cytosol,cyclin A2-CDK2 complex	protein binding,protein kinase binding,protein domain specific binding,cyclin-dependent protein kinase activity	G2/M transition of mitotic cell cycle,Ras protein signal transduction,viral process,histone phosphorylation,protein deubiquitination,animal organ regeneration,response to glucagon,cellular response to platelet-derived growth factor stimulus,cellular response to leptin stimulus,cell cycle G1/S phase transition,positive regulation of transcription, DNA-templated,positive regulation of fibroblast pr…
0.980522	0.0313565	0.0379132	O14979	HNRNPDL	Heterogeneous nuclear ribonucleoprotein D-like	11	nucleoplasm,cytosol,extracellular exosome	DNA binding,RNA binding,protein binding	transcription, DNA-templated,regulation of transcription, DNA-templated,interleukin-12-mediated signaling pathway
0.979423	0.000398932	0.0010027	Q9P215	POGK	Pogo transposable element with KRAB domain	5	nucleus	DNA binding,protein binding	regulation of transcription, DNA-templated,multicellular organism development
0.97775	0.0359282	0.0421622	Q8TDB6	DTX3L	E3 ubiquitin-protein ligase DTX3L	2	nucleus,nucleoplasm,cytoplasm,lysosome,lysosomal membrane,cytosol,early endosome membrane,protein complex,early endosome	RNA binding,ubiquitin-protein transferase activity,enzyme inhibitor activity,protein binding,enzyme activator activity,enzyme binding,histone binding,ubiquitin-like protein ligase binding,metal ion binding,STAT family protein binding	protein polyubiquitination,positive regulation of defense response to virus by host,double-strand break repair,cellular response to DNA damage stimulus,endosome to lysosome transport,histone monoubiquitination,protein transport,positive regulation of protein binding,histone H2A ubiquitination,histone H2B ubiquitination,positive regulation of chromatin binding,protein ubiquitination involved in ub…
0.976038	0.984411	0.444573	O43752	STX6	Syntaxin-6	2	Golgi membrane,nucleoplasm,early endosome,Golgi apparatus,trans-Golgi network,cytosol,plasma membrane,integral component of membrane,clathrin-coated vesicle,integral component of synaptic vesicle membrane,SNARE complex,trans-Golgi network membrane,terminal bouton,phagocytic vesicle,perinuclear region of cytoplasm	SNAP receptor activity,protein binding,syntaxin binding	intracellular protein transport,vesicle fusion,endosome organization,endocytic recycling,regulation of protein localization,retrograde transport, endosome to Golgi,Golgi vesicle transport,vesicle docking,Golgi ribbon formation,regulation of cellular protein localization
0.975774	0.0909765	0.0850362	Q9HBR0	SLC38A10	Putative sodium-coupled neutral amino acid transporter 10	1	Golgi apparatus,integral component of membrane	amino acid transmembrane transporter activity	amino acid transmembrane transport,sodium ion transport,bone development
0.975305	0.00611191	0.0102004	P06744	GPI	Glucose-6-phosphate isomerase	7	extracellular region,nucleoplasm,cytosol,plasma membrane,membrane,secretory granule lumen,neuron projection,myelin sheath,ciliary membrane,extracellular exosome,ficolin-1-rich granule lumen	glucose-6-phosphate isomerase activity,cytokine activity,growth factor activity,intramolecular transferase activity,ubiquitin protein ligase binding,monosaccharide binding	angiogenesis,in utero embryonic development,mesoderm formation,carbohydrate metabolic process,gluconeogenesis,humoral immune response,hemostasis,learning or memory,regulation of receptor activity,methylglyoxal biosynthetic process,response to estradiol,response to progesterone,response to testosterone,erythrocyte homeostasis,response to immobilization stress,response to muscle stretch,glucose hom…
0.973747	0.00201481	0.00406329	Q92890	UFD1L	Ubiquitin fusion degradation protein 1 homolog	4	nucleus,nucleoplasm,endoplasmic reticulum,cytosol,VCP-NPL4-UFD1 AAA ATPase complex,UFD1-NPL4 complex	thiol-dependent ubiquitin-specific protease activity,receptor binding,protein binding,protein complex binding,K48-linked polyubiquitin binding,ATPase binding	skeletal system development,ubiquitin-dependent protein catabolic process,protein deubiquitination,retrograde protein transport, ER to cytosol,negative regulation of type I interferon production,negative regulation of RIG-I signaling pathway,proteasome-mediated ubiquitin-dependent protein catabolic process,error-free translesion synthesis,ER-associated misfolded protein catabolic process
0.97174	0.0631944	0.0646538	Q7L592	NDUFAF7	NADH dehydrogenase [ubiquinone] complex I, assembly factor 7	4	extracellular space,mitochondrion,mitochondrial matrix	protein binding,methyltransferase activity,enzyme binding,protein-arginine omega-N symmetric methyltransferase activity	peptidyl-arginine methylation, to symmetrical-dimethyl arginine,mitochondrial respiratory chain complex I assembly,ATP metabolic process
0.971088	0.000304637	0.000792736	P25440	BRD2	Bromodomain-containing protein 2	15	nucleoplasm,cytoplasm,nuclear speck	chromatin binding,protein binding,lysine-acetylated histone binding	nucleosome assembly,transcription, DNA-templated,regulation of transcription from RNA polymerase II promoter,spermatogenesis,chromatin modification
0.969716	0.00174169	0.00359583	Q12772	SREBF2	Sterol regulatory element-binding protein 2	4	Golgi membrane,nucleus,nucleoplasm,cytoplasm,mitochondrion,endoplasmic reticulum,endoplasmic reticulum membrane,cytosol,ER to Golgi transport vesicle membrane,SREBP-SCAP-Insig complex,intracellular membrane-bounded organelle	RNA polymerase II core promoter proximal region sequence-specific DNA binding,transcriptional repressor activity, RNA polymerase II core promoter proximal region sequence-specific binding,protein binding,protein C-terminus binding,protein dimerization activity,E-box binding,C-8 sterol isomerase activity	negative regulation of transcription from RNA polymerase II promoter,transcription, DNA-templated,lipid metabolic process,cholesterol metabolic process,cellular response to starvation,positive regulation of cholesterol storage,regulation of cholesterol biosynthetic process,positive regulation of transcription from RNA polymerase II promoter,cellular response to low-density lipoprotein particle st…
0.968792	0.00789136	0.0125945	Q9Y276	BCS1L	Mitochondrial chaperone BCS1	1	mitochondrion,mitochondrial respiratory chain complex III,integral component of membrane	protein binding,ATP binding	mitochondrion organization,mitochondrial respiratory chain complex I assembly,mitochondrial respiratory chain complex IV assembly,mitochondrial respiratory chain complex III assembly
0.968477	0.047645	0.0523443	P01857	IGHG1	Ig gamma-1 chain C region	8	extracellular region,extracellular space,external side of plasma membrane,immunoglobulin complex, circulating,extracellular exosome,blood microparticle	antigen binding,serine-type endopeptidase activity,protein binding,immunoglobulin receptor binding	proteolysis,phagocytosis, recognition,phagocytosis, engulfment,complement activation,complement activation, classical pathway,regulation of complement activation,Fc-gamma receptor signaling pathway involved in phagocytosis,defense response to bacterium,innate immune response,B cell receptor signaling pathway,positive regulation of B cell activation
0.964183	0.127876	0.110034	Q8N0S6	CENPL	Centromere protein L	1	chromosome, centromeric region,nucleoplasm,cytosol	protein binding	sister chromatid cohesion,CENP-A containing nucleosome assembly
0.957263	0.295914	0.201676	Q4G0A6	FAM188B	Protein FAM188B	1		thiol-dependent ubiquitinyl hydrolase activity	proteolysis
0.956924	0.110073	0.0983167	Q8WV22	NSMCE1	Non-structural maintenance of chromosomes element 1 homolog	2	chromosome, telomeric region,nucleus,nucleoplasm,Smc5-Smc6 complex,intracellular membrane-bounded organelle	ubiquitin-protein transferase activity,protein binding,ligase activity,metal ion binding,protein dimerization activity	double-strand break repair via homologous recombination,postreplication repair,protein ubiquitination,intracellular signal transduction,positive regulation of response to DNA damage stimulus
0.955129	0.0045049	0.00794715	Q96QD9	FYTTD1	UAP56-interacting factor	3	nucleoplasm,nuclear speck	RNA binding,mRNA binding,protein binding	mRNA export from nucleus
0.954853	0.00490949	0.00854036	Q92833	JARID2	Protein Jumonji	2	nucleus,nucleoplasm,mitochondrion,histone methyltransferase complex,ESC/E(Z) complex	RNA polymerase II regulatory region sequence-specific DNA binding,transcriptional repressor activity, RNA polymerase II transcription regulatory region sequence-specific binding,chromatin binding,transcription factor binding,histone demethylase activity	negative regulation of transcription from RNA polymerase II promoter,liver development,transcription, DNA-templated,central nervous system development,negative regulation of cardiac muscle hypertrophy,chromatin modification,negative regulation of histone methylation,negative regulation of gene expression, epigenetic,negative regulation of transcription, DNA-templated,spleen development,thymus dev…
0.953398	0.0285972	0.0352927	P61009	SPCS3	Signal peptidase complex subunit 3	2	endoplasmic reticulum,signal peptidase complex,endoplasmic reticulum membrane,integral component of membrane,organelle membrane	peptidase activity	signal peptide processing,proteolysis,protein targeting to ER
0.950679	0.00129884	0.00278807	Q96DE5	ANAPC16	Anaphase-promoting complex subunit 16	3	kinetochore,condensed chromosome kinetochore,nucleoplasm,anaphase-promoting complex,cytosol		protein ubiquitination,anaphase-promoting complex-dependent catabolic process,protein ubiquitination involved in ubiquitin-dependent protein catabolic process,proteasome-mediated ubiquitin-dependent protein catabolic process,cell division,negative regulation of ubiquitin-protein ligase activity involved in mitotic cell cycle,positive regulation of ubiquitin-protein ligase activity involved in reg…
0.950152	0.13256	0.113037	Q5GLZ8	HERC4	Probable E3 ubiquitin-protein ligase HERC4	1	fibrillar center,cytoplasm,cytosol	ubiquitin protein ligase activity	spermatogenesis,protein ubiquitination,cell differentiation
0.946309	0.066767	0.0674317	Q99592	ZBTB18	Zinc finger and BTB domain-containing protein 18	1	nuclear chromosome,nucleus	DNA binding,transcription factor activity, sequence-specific DNA binding,transcription coactivator activity,protein binding,sequence-specific DNA binding,metal ion binding	negative regulation of transcription from RNA polymerase II promoter,transcription, DNA-templated,skeletal muscle tissue development,negative regulation of transcription, DNA-templated,positive regulation of transcription from RNA polymerase II promoter
0.942833	3.08901e-07	1.58993e-06	Q9Y3A2	UTP11L	Probable U3 small nucleolar RNA-associated protein 11	9	extracellular space,nucleoplasm,nucleolus,cytoplasm,small-subunit processome	RNA binding,protein binding	rRNA processing,nervous system development,ribosomal small subunit biogenesis,positive regulation of apoptotic process
0.942634	0.00896889	0.0139057	Q9Y3D0	FAM96B	Mitotic spindle-associated MMXD complex subunit MIP18	3	nucleus,nucleoplasm,cytoplasm,spindle,cytosol,MMXD complex,CIA complex	protein binding	chromosome segregation,iron-sulfur cluster assembly
0.940208	0.0191419	0.0257185	P08069	IGF1R	Insulin-like growth factor 1 receptor	1	plasma membrane,integral component of plasma membrane,membrane,alphav-beta3 integrin-IGF-1-IGF1R complex,intracellular membrane-bounded organelle,receptor complex	protein tyrosine kinase activity,insulin-like growth factor-activated receptor activity,insulin receptor binding,protein binding,insulin-like growth factor binding,ATP binding,insulin-like growth factor I binding,identical protein binding,phosphatidylinositol 3-kinase binding,insulin binding,insulin receptor substrate binding	immune response,signal transduction,positive regulation of cell proliferation,insulin receptor signaling pathway,phosphatidylinositol 3-kinase signaling,positive regulation of cell migration,peptidyl-tyrosine autophosphorylation,negative regulation of apoptotic process,positive regulation of protein complex disassembly,positive regulation of DNA replication,regulation of JNK cascade,protein autop…
0.936984	0.0562	0.0592827	Q8NBT2	SPC24	Kinetochore protein Spc24	7	condensed chromosome kinetochore,nucleus,nucleolus,cytosol,Ndc80 complex	protein binding	sister chromatid cohesion,cell division
0.936296	0.00708983	0.0115309	P49354	FNTA	Protein farnesyltransferase/geranylgeranyltransferase type-1 subunit alpha	1	cytoplasm,cytosol,microtubule associated complex,plasma membrane,CAAX-protein geranylgeranyltransferase complex,protein farnesyltransferase complex	protein farnesyltransferase activity,protein geranylgeranyltransferase activity,Rab geranylgeranyltransferase activity,protein binding,microtubule binding,acetylcholine receptor regulator activity,receptor tyrosine kinase binding,alpha-tubulin binding,CAAX-protein geranylgeranyltransferase activity	transforming growth factor beta receptor signaling pathway,protein farnesylation,protein geranylgeranylation,regulation of rhodopsin mediated signaling pathway,neurotransmitter receptor metabolic process,skeletal muscle acetylcholine-gated channel clustering,positive regulation of tubulin deacetylation,positive regulation of deacetylase activity,execution phase of apoptosis,regulation of neurotra…
0.934335	0.0293449	0.0360089	Q86Z20	CCDC125	Coiled-coil domain-containing protein 125	1	cytoplasm	molecular_function	negative regulation of Rho protein signal transduction,activation of GTPase activity,negative regulation of cell motility
0.932028	0.13739	0.116081	Q9BR11	ZSWIM1	Zinc finger SWIM domain-containing protein 1	1	nucleus	zinc ion binding
0.931772	0.00406173	0.00731431	Q96FF9	CDCA5	Sororin	5	chromosome, centromeric region,nuclear chromatin,nucleus,nucleoplasm,chromosome,cytoplasm,cytosol,cohesin complex	chromatin binding,protein binding	mitotic cell cycle,double-strand break repair,sister chromatid cohesion,mitotic sister chromatid cohesion,mitotic chromosome condensation,mitotic metaphase plate congression,positive regulation of exit from mitosis,cell division,regulation of cohesin loading
0.931268	0.961407	0.438913	P20290	BTF3	Transcription factor BTF3	5	nucleus,cytosol	RNA binding,protein binding	in utero embryonic development,regulation of transcription, DNA-templated,transcription from RNA polymerase II promoter,protein transport
0.931008	2.75535e-07	1.43082e-06	Q9NXX6	NSMCE4A	Non-structural maintenance of chromosomes element 4 homolog A	5	chromosome, telomeric region,nucleoplasm,nuclear body,Smc5-Smc6 complex	protein binding	DNA repair,DNA recombination,positive regulation of response to DNA damage stimulus
0.929659	0.0122026	0.0179074	O43681	ASNA1	ATPase ASNA1	1	nucleus,nucleolus,cytoplasm,endoplasmic reticulum membrane,extracellular exosome	transporter activity,protein binding,ATP binding,arsenite transmembrane transporter activity,ATPase activity,metal ion binding	transport,arsenite transport,IRE1-mediated unfolded protein response
0.929406	0.00514637	0.00887961	Q9BWG6	SCNM1	Sodium channel modifier 1	5	nuclear speck	protein binding,enzyme binding,metal ion binding	mRNA processing,RNA splicing
0.929014	0.0866532	0.0820025	Q9Y2Z2	MTO1	Protein MTO1 homolog, mitochondrial	3	mitochondrion	RNA binding,flavin adenine dinucleotide binding	tRNA methylation,mitochondrial tRNA wobble uridine modification
0.927705	7.26971e-08	4.16091e-07	Q86UV5	USP48	Ubiquitin carboxyl-terminal hydrolase 48	17	nucleoplasm,mitochondrion,cytosol	thiol-dependent ubiquitin-specific protease activity	ubiquitin-dependent protein catabolic process,protein deubiquitination
0.927241	0.00528232	0.00906948	Q9BYD3	MRPL4	39S ribosomal protein L4, mitochondrial	4	mitochondrial inner membrane,mitochondrial large ribosomal subunit,cytosolic ribosome	RNA binding,structural constituent of ribosome,protein binding	translation,mitochondrial translational elongation,mitochondrial translational termination
0.926465	0.0856305	0.0813536	Q8IUR7	ARMC8	Armadillo repeat-containing protein 8	3	extracellular region,specific granule lumen,tertiary granule lumen	protein binding	neutrophil degranulation
0.925904	1.04598e-46	1.12644e-44	Q14683	SMC1A	Structural maintenance of chromosomes protein 1A	58	chromosome, centromeric region,kinetochore,condensed chromosome kinetochore,condensed nuclear chromosome,nucleus,nucleoplasm,chromosome,cytosol,cohesin complex,nuclear matrix,meiotic cohesin complex,mitotic spindle pole	chromatin binding,RNA binding,protein binding,ATP binding,mediator complex binding,protein heterodimerization activity	mitotic sister chromatid segregation,DNA repair,sister chromatid cohesion,mitotic sister chromatid cohesion,response to radiation,stem cell population maintenance,negative regulation of DNA endoreduplication,cell division,meiotic cell cycle,response to DNA damage checkpoint signaling,regulation of mitotic spindle assembly
0.925611	0.0743733	0.0731918	Q8N1B4	VPS52	Vacuolar protein sorting-associated protein 52 homolog	5	GARP complex,Golgi apparatus,cytosol,endosome membrane,membrane,trans-Golgi network membrane,perinuclear region of cytoplasm,recycling endosome,EARP complex	protein binding,Rab GTPase binding,syntaxin binding	Golgi to vacuole transport,lysosomal transport,ectodermal cell differentiation,protein transport,endocytic recycling,retrograde transport, endosome to Golgi,embryonic ectodermal digestive tract development
0.925283	0.00415915	0.00744986	Q9HCE5	METTL14	N6-adenosine-methyltransferase subunit METTL14	1	nucleus,nucleoplasm,MIS complex	mRNA binding,protein binding,mRNA (2'-O-methyladenosine-N6-)-methyltransferase activity,S-adenosyl-L-methionine binding	mRNA splicing, via spliceosome,mRNA catabolic process,spermatogenesis,RNA metabolic process,stem cell population maintenance,forebrain radial glial cell differentiation,gliogenesis,mRNA destabilization,mRNA methylation
0.925213	0.136546	0.115452	Q9NVH2	INTS7	Integrator complex subunit 7	7	nucleus,nucleoplasm,chromosome,cytoplasm,nuclear body,integrator complex	protein binding	DNA damage checkpoint,snRNA processing,snRNA 3'-end processing,snRNA transcription from RNA polymerase II promoter,cellular response to ionizing radiation
0.924328	2.10057e-05	7.36675e-05	Q9NPH2	ISYNA1	Inositol-3-phosphate synthase 1	7	cytoplasm,cytosol	inositol-3-phosphate synthase activity,protein binding	inositol biosynthetic process,phospholipid biosynthetic process,inositol phosphate metabolic process
0.922983	0.0190185	0.025587	Q9BS16	CENPK	Centromere protein K	2	condensed chromosome kinetochore,nucleoplasm,cytosol	protein binding	sister chromatid cohesion,CENP-A containing nucleosome assembly
0.920801	0.0115143	0.0170944	Q9Y5V3	MAGED1	Melanoma-associated antigen D1	7	chromatin,nucleus,cytoplasm,plasma membrane,protein complex	transcription coactivator activity,protein binding,identical protein binding	regulation of transcription, DNA-templated,regulation of transcription from RNA polymerase II promoter,circadian regulation of gene expression,regulation of circadian rhythm,regulation of apoptotic process,positive regulation of MAP kinase activity,negative regulation of transcription, DNA-templated,positive regulation of transcription, DNA-templated,negative regulation of epithelial cell prolife…
0.920715	0.021484	0.0281731	Q9H9L3	ISG20L2	Interferon-stimulated 20 kDa exonuclease-like 2	7	nucleoplasm,nucleolus	3'-5'-exoribonuclease activity,RNA binding,protein binding	rRNA processing,RNA phosphodiester bond hydrolysis, exonucleolytic
0.92014	3.07251e-29	1.27264e-27	P55072	VCP	Transitional endoplasmic reticulum ATPase	39	proteasome complex,extracellular region,nucleus,nucleoplasm,cytoplasm,endoplasmic reticulum,endoplasmic reticulum membrane,lipid particle,cytosol,VCP-NPL4-UFD1 AAA ATPase complex,secretory granule lumen,azurophil granule lumen,site of double-strand break,Derlin-1 retrotranslocation complex,myelin sheath,intracellular membrane-bounded organelle,protein complex,perinuclear region of cytoplasm,extra…	RNA binding,protein binding,ATP binding,lipid binding,ATPase activity,protein phosphatase binding,protein domain specific binding,polyubiquitin binding,ubiquitin protein ligase binding,deubiquitinase activator activity,K48-linked polyubiquitin binding,MHC class I protein binding,identical protein binding,ADP binding,ubiquitin-like protein ligase binding,BAT3 complex binding,ubiquitin-specific pro…	DNA repair,double-strand break repair,protein folding,protein methylation,NADH metabolic process,ER to Golgi vesicle-mediated transport,autophagy,activation of cysteine-type endopeptidase activity involved in apoptotic process,cellular response to DNA damage stimulus,proteasomal protein catabolic process,positive regulation of mitochondrial membrane potential,macroautophagy,protein ubiquitination…
0.919974	0.469022	0.27727	Q8NEH6	MNS1	Meiosis-specific nuclear structural protein 1	1	nuclear envelope,intermediate filament,axoneme,motile cilium,sperm flagellum	identical protein binding	spermatogenesis,cilium organization,positive regulation of cilium assembly,meiotic cell cycle,left/right axis specification
0.91915	0.0253281	0.0320899	Q9BWT7	CARD10	Caspase recruitment domain-containing protein 10	1	cytoplasm,CBM complex	protein binding,receptor signaling complex scaffold activity	protein complex assembly,activation of NF-kappaB-inducing kinase activity,regulation of apoptotic process
0.919093	0.000126065	0.000360775	P48552	NRIP1	Nuclear receptor-interacting protein 1	10	histone deacetylase complex,nuclear chromatin,nucleus,nucleolus,nuclear speck	core promoter sequence-specific DNA binding,transcription coactivator activity,transcription corepressor activity,protein binding,estrogen receptor binding,nuclear hormone receptor binding,glucocorticoid receptor binding,histone deacetylase binding,retinoid X receptor binding,androgen receptor binding	negative regulation of transcription from RNA polymerase II promoter,ovarian follicle rupture,transcription, DNA-templated,circadian rhythm,lipid storage,androgen receptor signaling pathway,circadian regulation of gene expression,positive regulation of transcription, DNA-templated,positive regulation of transcription from RNA polymerase II promoter,cellular response to estradiol stimulus
0.91757	0.00382462	0.00696048	Q9NRF9	POLE3	DNA polymerase epsilon subunit 3	2	nucleus,nucleoplasm,Ada2/Gcn5/Ada3 transcription activator complex,epsilon DNA polymerase complex	DNA binding,DNA-directed DNA polymerase activity,protein binding,protein heterodimerization activity	G1/S transition of mitotic cell cycle,DNA replication,DNA replication initiation,telomere maintenance via semi-conservative replication,histone H3 acetylation,DNA biosynthetic process
0.916059	1.32741e-10	1.15714e-09	Q9UQ80	PA2G4	Proliferation-associated protein 2G4	13	extracellular region,nucleus,nucleolus,cytoplasm,membrane,intracellular ribonucleoprotein complex,azurophil granule lumen,extracellular exosome	DNA binding,transcription factor activity, sequence-specific DNA binding,RNA binding,protein binding,ubiquitin protein ligase binding	transcription, DNA-templated,rRNA processing,regulation of translation,cell cycle arrest,cell proliferation,negative regulation of apoptotic process,neutrophil degranulation,positive regulation of cell differentiation,negative regulation of transcription, DNA-templated
0.915869	0.269179	0.189125	Q3ZCT1	ZNF260	Zinc finger protein 260	1	nucleoplasm,cytosol	DNA binding,transcription factor activity, sequence-specific DNA binding,protein binding,metal ion binding	transcription, DNA-templated,regulation of transcription, DNA-templated,multicellular organism development
0.914467	0.0523951	0.0563389	O15446	CD3EAP	DNA-directed RNA polymerase I subunit RPA34	2	RNA polymerase I transcription factor complex,fibrillar center,nucleus,nucleoplasm,chromosome,nucleolus,mitochondrion,cytosol	RNA binding,DNA-directed RNA polymerase activity	transcription initiation from RNA polymerase I promoter,transcription elongation from RNA polymerase I promoter,termination of RNA polymerase I transcription,transmembrane receptor protein tyrosine kinase signaling pathway,rRNA transcription,positive regulation of gene expression, epigenetic
0.913262	0.0121074	0.0177901	Q9UJX3	ANAPC7	Anaphase-promoting complex subunit 7	2	nucleus,nucleoplasm,anaphase-promoting complex,cytosol	protein phosphatase binding	anaphase-promoting complex-dependent catabolic process,protein ubiquitination involved in ubiquitin-dependent protein catabolic process,proteasome-mediated ubiquitin-dependent protein catabolic process,cell division,negative regulation of ubiquitin-protein ligase activity involved in mitotic cell cycle,positive regulation of ubiquitin-protein ligase activity involved in regulation of mitotic cell…
0.912773	0.268361	0.188735	Q96E29	MTERF3	Transcription termination factor 3, mitochondrial	1	nucleoplasm,mitochondrion,mitochondrial outer membrane	double-stranded DNA binding,single-stranded RNA binding,protein binding,rRNA binding,transcription regulatory region DNA binding	transcription, DNA-templated,RNA splicing,macroautophagy,developmental process,ribosome assembly,negative regulation of transcription, DNA-templated
0.911053	0.01095	0.0164273	Q5U3C3	TMEM164	Transmembrane protein 164	1	integral component of membrane
0.910942	0.542108	0.30429	P46782	RPS5	40S ribosomal protein S5	3	nucleoplasm,cytosol,focal adhesion,membrane,cytosolic small ribosomal subunit,intracellular ribonucleoprotein complex,extracellular matrix,extracellular exosome	RNA binding,mRNA binding,structural constituent of ribosome,protein binding,rRNA binding	ribosomal small subunit assembly,nuclear-transcribed mRNA catabolic process, nonsense-mediated decay,rRNA processing,translation,translational initiation,regulation of translational fidelity,SRP-dependent cotranslational protein targeting to membrane,viral transcription
0.909846	0.00231652	0.00458171	Q9BWF3	RBM4	RNA-binding protein 4	5	nucleus,nucleoplasm,nucleolus,cytoplasm,cytosol,cytoplasmic stress granule,nuclear speck	RNA binding,mRNA binding,mRNA 3'-UTR binding,protein binding,zinc ion binding,cyclin binding,miRNA binding,pre-mRNA intronic binding,pre-mRNA intronic pyrimidine-rich binding	regulation of alternative mRNA splicing, via spliceosome,cap-independent translational initiation,IRES-dependent translational initiation,RNA processing,mRNA processing,RNA splicing,negative regulation of translation,cell differentiation,negative regulation of translation in response to stress,miRNA mediated inhibition of translation,entrainment of circadian clock by photoperiod,negative regulati…
0.905062	0.0593787	0.0617793	Q96KP1	EXOC2	Exocyst complex component 2	5	exocyst,cytosol,plasma membrane,membrane,Flemming body	protein binding,Ral GTPase binding,protein kinase binding,protein N-terminus binding	exocyst assembly,Golgi to plasma membrane transport,protein transport,regulation of entry of bacterium into host cell
0.902898	2.03982e-07	1.08915e-06	Q9NYH9	UTP6	U3 small nucleolar RNA-associated protein 6 homolog	17	nucleoplasm,nucleolus,small-subunit processome,Pwp2p-containing subcomplex of 90S preribosome	snoRNA binding	maturation of SSU-rRNA from tricistronic rRNA transcript (SSU-rRNA, 5.8S rRNA, LSU-rRNA),rRNA processing
0.900958	0.208826	0.157382	Q8NCJ5	SPRYD3	SPRY domain-containing protein 3	1
0.900848	3.70765e-13	4.49023e-12	Q9H7S9	ZNF703	Zinc finger protein 703	16	nucleus,cytoplasm,nuclear matrix,protein complex	nucleic acid binding,protein binding,metal ion binding,repressing transcription factor binding	transcription, DNA-templated,regulation of transcription, DNA-templated,positive regulation of cell proliferation,positive regulation of epithelial to mesenchymal transition,regulation of transforming growth factor beta receptor signaling pathway,positive regulation of cell migration,positive regulation of mammary gland epithelial cell proliferation,negative regulation of homotypic cell-cell adhe…
0.900802	0.259145	0.183996	Q9NYB0	TERF2IP	Telomeric repeat-binding factor 2-interacting protein 1	1	nuclear chromosome,chromosome, telomeric region,nuclear telomere cap complex,nuclear chromosome, telomeric region,nucleus,nuclear envelope,nucleoplasm,cytoplasm,cytosol,nuclear body,telosome,Mre11 complex	protein binding,phosphatase binding,telomeric DNA binding,G-rich strand telomeric DNA binding	telomere maintenance,negative regulation of protein phosphorylation,transcription, DNA-templated,regulation of transcription, DNA-templated,telomere maintenance via telomerase,regulation of double-strand break repair via homologous recombination,telomere maintenance via telomere lengthening,telomere capping,protection from non-homologous end joining at telomere,regulation of telomere maintenance,…
0.900499	0.00284875	0.00545798	Q03519	TAP2	Antigen peptide transporter 2	1	endoplasmic reticulum,endoplasmic reticulum membrane,membrane,integral component of membrane,nuclear speck,integral component of endoplasmic reticulum membrane,phagocytic vesicle membrane,endoplasmic reticulum-Golgi intermediate compartment membrane,TAP complex	transporter activity,protein binding,ATP binding,peptide antigen-transporting ATPase activity,MHC class Ib protein binding,TAP1 binding,tapasin binding,peptide transporter activity	adaptive immune response,antigen processing and presentation of peptide antigen via MHC class I,antigen processing and presentation of exogenous peptide antigen via MHC class I, TAP-dependent,antigen processing and presentation of endogenous peptide antigen via MHC class Ib via ER pathway, TAP-dependent,protein transport,viral process,antigen processing and presentation of endogenous peptide anti…
0.899799	0.0104805	0.0158384	Q9Y605	MRFAP1	MORF4 family-associated protein 1	1	nucleus,cytosol,perinuclear region of cytoplasm	protein binding
0.898252	0.345406	0.224477	Q9HC38	GLOD4	Glyoxalase domain-containing protein 4	2	mitochondrion,extracellular exosome	cadherin binding
0.896671	1.42051e-05	5.18163e-05	Q8NB25	FAM184A	Protein FAM184A	11	extracellular space	molecular_function,protein binding	biological_process
0.894734	0.117199	0.102961	Q9P2K1	CC2D2A	Coiled-coil and C2 domain-containing protein 2A	1	cytosol,cytoskeleton,ciliary transition zone,MKS complex		neural tube closure,smoothened signaling pathway,determination of left/right symmetry,heart development,axoneme assembly,camera-type eye development,motile cilium assembly,cilium morphogenesis,ciliary basal body docking,protein localization to ciliary transition zone,Requires Ontology,embryonic brain development
0.893686	0.000116225	0.000336187	Q8NCD3	HJURP	Holliday junction recognition protein	8	chromosome, centromeric region,condensed chromosome kinetochore,nucleus,nucleoplasm,nucleolus,mitochondrion,cytosol	DNA binding,protein binding,histone binding,identical protein binding	cell cycle,chromosome segregation,CENP-A containing nucleosome assembly,regulation of protein complex assembly,regulation of DNA binding
0.89367	3.29258e-07	1.6848e-06	Q8TED0	UTP15	U3 small nucleolar RNA-associated protein 15 homolog	15	fibrillar center,nucleoplasm,nucleolus,cytoplasm,endoplasmic reticulum	RNA binding,protein binding	transcription, DNA-templated,rRNA processing,positive regulation of transcription from RNA polymerase I promoter,positive regulation of rRNA processing
0.889719	0.0211814	0.0278734	Q969X6	CIRH1A	Cirhin	15	fibrillar center,nucleoplasm,chromosome,nucleolus,t-UTP complex	RNA binding,protein binding	transcription, DNA-templated,regulation of transcription, DNA-templated,rRNA processing,maturation of SSU-rRNA
0.889029	5.29712e-05	0.000167555	Q6NS38	ALKBH2	DNA oxidative demethylase ALKBH2	2	nucleus,nucleoplasm,microtubule cytoskeleton	ferrous iron binding,DNA-N1-methyladenine dioxygenase activity,cytosine C-5 DNA demethylase activity,Requires Ontology	DNA dealkylation involved in DNA repair,oxidative DNA demethylation,oxidative demethylation,DNA demethylation
0.888374	0.0893658	0.0839453	Q6ZN54	DEF8	Differentially expressed in FDCP 8 homolog	2	intracellular	metal ion binding	lysosome localization,intracellular signal transduction,positive regulation of bone resorption,positive regulation of ruffle assembly
0.886928	1.94322e-08	1.22105e-07	P00492	HPRT1	Hypoxanthine-guanine phosphoribosyltransferase	7	cytoplasm,cytosol,extracellular exosome	nucleotide binding,magnesium ion binding,hypoxanthine phosphoribosyltransferase activity,protein binding,identical protein binding,protein homodimerization activity,guanine phosphoribosyltransferase activity	response to amphetamine,purine nucleotide biosynthetic process,purine ribonucleoside salvage,adenine salvage,guanine salvage,grooming behavior,locomotory behavior,cytolysis,striatum development,cerebral cortex neuron differentiation,central nervous system neuron development,IMP salvage,dopamine metabolic process,purine-containing compound salvage,hypoxanthine salvage,positive regulation of dopami…
0.884624	0.010473	0.0158305	Q9BW92	TARS2	Threonine--tRNA ligase, mitochondrial	4	cellular_component,mitochondrion,mitochondrial matrix	aminoacyl-tRNA editing activity,threonine-tRNA ligase activity,ATP binding,protein homodimerization activity	mitochondrial threonyl-tRNA aminoacylation,Requires Ontology
0.884107	0.0189638	0.0255282	Q5T653	MRPL2	39S ribosomal protein L2, mitochondrial	2	mitochondrial inner membrane,mitochondrial large ribosomal subunit	RNA binding,structural constituent of ribosome	mitochondrial translation,mitochondrial translational elongation,mitochondrial translational termination,cytoplasmic translation
0.882877	1.62147e-06	7.3799e-06	Q5SXM2	SNAPC4	snRNA-activating protein complex subunit 4	12	nucleus,nucleoplasm,snRNA-activating protein complex	RNA polymerase II transcription factor activity, sequence-specific DNA binding,transcription factor activity, RNA polymerase II transcription factor recruiting,DNA binding,transcription factor activity, sequence-specific DNA binding,sequence-specific DNA binding,transcription regulatory region DNA binding	regulation of transcription from RNA polymerase II promoter,transcription from RNA polymerase II promoter,transcription from RNA polymerase III promoter,snRNA transcription,cell differentiation,snRNA transcription from RNA polymerase II promoter,snRNA transcription from RNA polymerase III promoter
0.882804	0.159678	0.12976	P14854	COX6B1	Cytochrome c oxidase subunit 6B1	1	mitochondrial inner membrane,mitochondrial intermembrane space	cytochrome-c oxidase activity	mitochondrial electron transport, cytochrome c to oxygen,substantia nigra development,hydrogen ion transmembrane transport
0.882138	0.249076	0.179044	Q6NYC8	PPP1R18	Phostensin	1	cytoplasm,cytoskeleton	actin binding,protein binding,phosphatase binding
0.882132	0.538171	0.302853	Q9UPT9	USP22	Ubiquitin carboxyl-terminal hydrolase 22	9	SAGA complex,nucleoplasm,nuclear speck,SAGA-type complex	transcription coactivator activity,thiol-dependent ubiquitin-specific protease activity,protein binding,zinc ion binding,enzyme binding,ligand-dependent nuclear receptor transcription coactivator activity,thiol-dependent ubiquitinyl hydrolase activity,H4 histone acetyltransferase activity	transcription, DNA-templated,ubiquitin-dependent protein catabolic process,cell cycle,embryo development,histone ubiquitination,histone deubiquitination,protein deubiquitination,histone H4 acetylation,positive regulation of transcription, DNA-templated,positive regulation of mitotic cell cycle
0.881648	0.00346158	0.00640525	Q9NXE4	SMPD4	Sphingomyelin phosphodiesterase 4	2	Golgi membrane,endoplasmic reticulum,endoplasmic reticulum membrane,Golgi apparatus,trans-Golgi network,integral component of membrane	sphingomyelin phosphodiesterase activity,metal ion binding,sphingomyelin phosphodiesterase D activity	sphingomyelin catabolic process,glycosphingolipid metabolic process,glycerophospholipid catabolic process,ceramide biosynthetic process,cellular response to tumor necrosis factor
0.879864	2.8319e-15	4.18213e-14	Q8NCN4	RNF169	E3 ubiquitin-protein ligase RNF169	17	nucleus,nucleoplasm,nuclear speck,site of double-strand break	transferase activity,nucleosome binding,metal ion binding,K63-linked polyubiquitin binding	cellular response to DNA damage stimulus,protein ubiquitination,negative regulation of double-strand break repair
0.879756	1.7644e-06	7.96314e-06	O00541	PES1	Pescadillo homolog	17	condensed chromosome,nucleus,nucleoplasm,nucleolus,cytosol,membrane,preribosome, large subunit precursor,PeBoW complex	RNA binding,protein binding	maturation of LSU-rRNA from tricistronic rRNA transcript (SSU-rRNA, 5.8S rRNA, LSU-rRNA),maturation of 5.8S rRNA from tricistronic rRNA transcript (SSU-rRNA, 5.8S rRNA, LSU-rRNA),rRNA processing,nucleolus organization,cell proliferation,protein localization to organelle,ribosomal large subunit biogenesis,regulation of cell cycle
0.878006	0.879358	0.415584	Q4VC05	BCL7A	B-cell CLL/lymphoma 7 protein family member A	6	cellular_component	molecular_function,protein binding	negative regulation of transcription, DNA-templated
0.877037	0.000718264	0.00167595	P05423	POLR3D	DNA-directed RNA polymerase III subunit RPC4	13	nucleoplasm,DNA-directed RNA polymerase III complex,cytosol,nuclear speck,nuclear chromatin	DNA binding,chromatin binding,RNA polymerase III activity	transcription from RNA polymerase III promoter,positive regulation of type I interferon production,positive regulation of interferon-beta production,innate immune response,positive regulation of innate immune response,defense response to virus
0.87618	0.198587	0.151709	P43694	GATA4	Transcription factor GATA-4	2	nucleus,nucleoplasm,nuclear body,RNA polymerase II transcription factor complex	RNA polymerase II regulatory region sequence-specific DNA binding,transcription factor activity, RNA polymerase II transcription factor binding,RNA polymerase II transcription factor binding,enhancer sequence-specific DNA binding,transcriptional activator activity, RNA polymerase II transcription regulatory region sequence-specific binding,DNA binding,chromatin binding,transcription coactivator a…	heart looping,endocardial cushion development,cardiac ventricle morphogenesis,cardiac right ventricle morphogenesis,ventricular septum development,atrial septum primum morphogenesis,atrial septum secundum morphogenesis,regulation of transcription, DNA-templated,transcription from RNA polymerase II promoter,cell-cell signaling,endoderm development,blood coagulation,male gonad development,response …
0.875011	0.0240085	0.0307612	Q15061	WDR43	WD repeat-containing protein 43	18	fibrillar center,nucleoplasm,nucleolus	RNA binding,protein binding	transcription, DNA-templated,rRNA processing,positive regulation of transcription from RNA polymerase I promoter,positive regulation of rRNA processing
0.8749	0.000152557	0.000430083	Q9UHW5	GPN3	GPN-loop GTPase 3	4	intracellular,protein complex	GTPase activity,protein binding,GTP binding	RNA polymerase II complex import to nucleus,RNA polymerase III complex localization to nucleus
0.874475	0.176208	0.13923	Q9Y6I9	TEX264	Testis-expressed sequence 264 protein	1	extracellular region,platelet alpha granule lumen,extracellular exosome	protein binding	platelet degranulation
0.874399	0.000120787	0.000347804	P04818	TYMS	Thymidylate synthase	2	nucleus,nucleolus,cytoplasm,mitochondrion,mitochondrial inner membrane,mitochondrial matrix,cytosol	nucleotide binding,translation repressor activity, nucleic acid binding,thymidylate synthase activity,folic acid binding,protein homodimerization activity,cofactor binding,sequence-specific mRNA binding	regulation of transcription involved in G1/S transition of mitotic cell cycle,dTMP biosynthetic process,dTTP biosynthetic process,aging,circadian rhythm,nucleobase-containing small molecule interconversion,negative regulation of translation,immortalization of host cell by virus,uracil metabolic process,methylation,response to progesterone,response to vitamin A,response to cytokine,tetrahydrofolat…
0.873929	6.58223e-06	2.62839e-05	O15360	FANCA	Fanconi anemia group A protein	4	nucleus,nucleoplasm,cytoplasm,Fanconi anaemia nuclear complex	protein binding	DNA repair,protein complex assembly,male meiosis,male gonad development,female gonad development,interstrand cross-link repair,regulation of cell proliferation,regulation of regulatory T cell differentiation,regulation of inflammatory response,regulation of sequence-specific DNA binding transcription factor activity,regulation of CD40 signaling pathway
0.873901	0.0343525	0.0407227	Q96EP5	DAZAP1	DAZ-associated protein 1	4	nucleoplasm,cytosol,protein complex,ribonucleoprotein complex	RNA binding,protein binding,poly(U) RNA binding,poly(G) binding,RNA stem-loop binding	maternal placenta development,spermatogenesis,cell proliferation,cell differentiation,positive regulation of mRNA splicing, via spliceosome
0.872471	0.0699883	0.0698187	A7MCY6	TBKBP1	TANK-binding kinase 1-binding protein 1	2		protein binding	viral process,innate immune response
0.872079	0.0007032	0.00164739	Q8IZT6	ASPM	Abnormal spindle-like microcephaly-associated protein	21	nucleus,cytoplasm,centrosome,apical plasma membrane,midbody,microtubule minus-end,meiotic spindle,mitotic spindle pole	calmodulin binding,protein kinase binding	neuron migration,positive regulation of neuroblast proliferation,spindle organization,spermatogenesis,male gonad development,forebrain neuroblast division,cerebral cortex development,negative regulation of neuron differentiation,negative regulation of asymmetric cell division,oogenesis,developmental growth,regulation of meiotic cell cycle,spindle localization,maintenance of centrosome location,po…
0.871733	0.0200427	0.0266627	Q9BTW9	TBCD	Tubulin-specific chaperone D	2	cytoplasm,centrosome,microtubule,adherens junction,bicellular tight junction,lateral plasma membrane	GTPase activator activity,protein binding,beta-tubulin binding,chaperone binding	mitotic cell cycle,protein folding,tubulin complex assembly,post-chaperonin tubulin folding pathway,negative regulation of cell-substrate adhesion,negative regulation of microtubule polymerization,adherens junction assembly,positive regulation of GTPase activity,cell morphogenesis involved in neuron differentiation,bicellular tight junction assembly
0.871641	2.86961e-08	1.75742e-07	Q7Z7L1	SLFN11	Schlafen family member 11	15	nucleus,nucleoplasm,cytosol,aggresome	tRNA binding,ATP binding	defense response to virus,negative regulation of G1/S transition of mitotic cell cycle
0.870675	5.40479e-08	3.15542e-07	Q9Y2R4	DDX52	Probable ATP-dependent RNA helicase DDX52	11	nucleoplasm,nucleolus,cytoplasm,membrane	RNA binding,ATP-dependent RNA helicase activity,ATP binding	rRNA processing,RNA secondary structure unwinding
0.86868	0.0110984	0.0165966	Q96H20	SNF8	Vacuolar-sorting protein SNF8	7	ESCRT II complex,nucleus,nucleoplasm,transcription factor complex,cytoplasm,cytosol,plasma membrane,endosome membrane,membrane,late endosome membrane,perinuclear region of cytoplasm,recycling endosome,extracellular exosome	protein binding,protein C-terminus binding,transcription factor binding,channel regulator activity,protein homodimerization activity,protein N-terminus binding	transcription, DNA-templated,regulation of transcription from RNA polymerase II promoter,positive regulation of gene expression,regulation of multivesicular body size involved in endosome transport,endosomal transport,macroautophagy,endocytic recycling,multivesicular body assembly,regulation of protein catabolic process,protein targeting to vacuole involved in ubiquitin-dependent protein cataboli…
0.868167	0.0144325	0.0205298	O00165	HAX1	HCLS1-associated protein X-1	5	cytoplasmic mRNA processing body,nuclear envelope,transcription factor complex,mitochondrion,mitochondrial outer membrane,mitochondrial intermembrane space,endoplasmic reticulum,plasma membrane,cell cortex,actin cytoskeleton,sarcoplasmic reticulum,lamellipodium,cytoplasmic vesicle,nuclear membrane	protein binding,interleukin-1 binding,protein N-terminus binding	positive regulation of phosphatidylinositol 3-kinase signaling,regulation of actin filament polymerization,positive regulation of granulocyte differentiation,positive regulation of peptidyl-serine phosphorylation,regulation of apoptotic process,negative regulation of apoptotic process,positive regulation of transcription from RNA polymerase II promoter,positive regulation of peptidyl-tyrosine pho…
0.866534	0.206235	0.155986	O95271	TNKS	Tankyrase-1	3	Golgi membrane,pericentriolar material,chromosome, centromeric region,chromosome, telomeric region,nuclear chromosome, telomeric region,nuclear pore,nucleoplasm,Golgi apparatus,cytosol,nuclear body,nuclear membrane,mitotic spindle pole	NAD+ ADP-ribosyltransferase activity,protein binding,zinc ion binding,histone binding	protein polyubiquitination,protein ADP-ribosylation,mitotic spindle organization,protein transport,Wnt signaling pathway,protein deubiquitination,peptidyl-serine phosphorylation,peptidyl-threonine phosphorylation,regulation of telomere maintenance via telomerase,positive regulation of telomere maintenance via telomerase,positive regulation of transcription from RNA polymerase II promoter,mRNA tra…
0.865087	0.00571295	0.00965322	Q9H7T9	AUNIP	Aurora kinase A and ninein-interacting protein	9	spindle pole,nucleus,cytoplasm,centrosome,Requires Ontology	damaged DNA binding,protein binding	double-strand break repair via homologous recombination,spindle organization,negative regulation of double-strand break repair via nonhomologous end joining
0.863962	0.00165305	0.00343364	A0AVF1	TTC26	Intraflagellar transport protein 56	4	centrosome,cilium,intraciliary transport particle B,ciliary basal body,ciliary tip		smoothened signaling pathway,spermatid development,intraciliary transport involved in cilium morphogenesis,intraciliary transport,cilium morphogenesis
0.863253	7.48329e-05	0.000227653	Q9Y546	LRRC42	Leucine-rich repeat-containing protein 42	8
0.862216	7.03068e-11	6.33394e-10	Q9H8V3	ECT2	Protein ECT2	20	nucleus,cytoplasm,cytosol,cell-cell junction,bicellular tight junction,midbody,cleavage furrow,mitotic spindle,centralspindlin complex	signal transducer activity,guanyl-nucleotide exchange factor activity,Rho guanyl-nucleotide exchange factor activity,GTPase activator activity,protein binding,protein homodimerization activity	mitotic cytokinesis,cell morphogenesis,G-protein coupled receptor signaling pathway,protein transport,activation of protein kinase activity,positive regulation of cytokinesis,regulation of Rho protein signal transduction,intracellular signal transduction,positive regulation of protein import into nucleus,positive regulation of apoptotic process,positive regulation of I-kappaB kinase/NF-kappaB sig…
0.861135	5.30887e-06	2.16562e-05	P07910	HNRNPC	Heterogeneous nuclear ribonucleoproteins C1/C2	24	nuclear chromatin,extracellular region,nucleus,nucleoplasm,spliceosomal complex,cytosol,actin cytoskeleton,membrane,protein complex,extracellular exosome,catalytic step 2 spliceosome,telomerase holoenzyme complex	RNA polymerase II core promoter proximal region sequence-specific DNA binding,RNA polymerase II distal enhancer sequence-specific DNA binding,RNA binding,mRNA 3'-UTR binding,protein binding,poly(U) RNA binding,nucleosomal DNA binding,identical protein binding,telomerase RNA binding,N6-methyladenosine-containing RNA binding	mRNA splicing, via spliceosome,osteoblast differentiation,RNA splicing,RNA metabolic process,negative regulation of telomere maintenance via telomerase,ATP-dependent chromatin remodeling,3'-UTR-mediated mRNA stabilization
0.860862	0.00202604	0.00408358	Q9NR48	ASH1L	Histone-lysine N-methyltransferase ASH1L	5	nucleus,nucleoplasm,chromosome,Golgi apparatus,bicellular tight junction,extracellular exosome	DNA binding,chromatin binding,histone-lysine N-methyltransferase activity,histone methyltransferase activity (H3-K4 specific),metal ion binding,histone methyltransferase activity (H3-K36 specific)	skeletal system development,negative regulation of acute inflammatory response,DNA packaging,transcription from RNA polymerase II promoter,cell-cell signaling,single fertilization,post-embryonic development,interleukin-6 production,negative regulation of I-kappaB kinase/NF-kappaB signaling,negative regulation of MAPK cascade,positive regulation of transcription from RNA polymerase II promoter,dec…
0.856177	1.19094e-05	4.43671e-05	Q96GD4	AURKB	Aurora kinase B	16	condensed chromosome, centromeric region,condensed nuclear chromosome, centromeric region,nucleus,nucleoplasm,spindle,cytosol,spindle microtubule,chromocenter,midbody,spindle pole centrosome,chromosome passenger complex,spindle midzone,mitotic spindle midzone,kinetochore	protein serine/threonine kinase activity,protein serine/threonine/tyrosine kinase activity,protein binding,ATP binding,kinase binding,histone serine kinase activity,metal ion binding	negative regulation of transcription from RNA polymerase II promoter,negative regulation of B cell apoptotic process,protein phosphorylation,spindle organization,sister chromatid cohesion,aging,cell proliferation,attachment of spindle microtubules to kinetochore,abscission,histone modification,protein sumoylation,anaphase-promoting complex-dependent catabolic process,spindle checkpoint,negative r…
0.852937	0.00393774	0.00713174	Q9HAS0	C17orf75	Protein Njmu-R1	2	cellular_component	molecular_function,protein binding
0.84949	0.492013	0.285816	Q9ULW3	ABT1	Activator of basal transcription 1	1	nucleus,transcription factor complex,nucleolus	DNA binding,transcription coactivator activity,RNA binding,protein binding	endonucleolytic cleavage in ITS1 to separate SSU-rRNA from 5.8S rRNA and LSU-rRNA from tricistronic rRNA transcript (SSU-rRNA, 5.8S rRNA, LSU-rRNA),endonucleolytic cleavage to generate mature 5'-end of SSU-rRNA from (SSU-rRNA, 5.8S rRNA, LSU-rRNA),endonucleolytic cleavage in 5'-ETS of tricistronic rRNA transcript (SSU-rRNA, 5.8S rRNA, LSU-rRNA),regulation of transcription from RNA polymerase II p…
0.849322	0.0521819	0.0561613	Q96H22	CENPN	Centromere protein N	2	condensed chromosome kinetochore,nucleus,nucleoplasm,cytosol		sister chromatid cohesion,CENP-A containing nucleosome assembly
0.84878	0.0014368	0.00304683	Q8TAT6	NPLOC4	Nuclear protein localization protein 4 homolog	6	nucleus,nucleoplasm,endoplasmic reticulum,cytosol,VCP-NPL4-UFD1 AAA ATPase complex,UFD1-NPL4 complex,nuclear outer membrane-endoplasmic reticulum membrane network	protein binding,ubiquitin protein ligase binding,ubiquitin binding,metal ion binding	ubiquitin-dependent protein catabolic process,Golgi organization,ER-associated ubiquitin-dependent protein catabolic process,retrograde protein transport, ER to cytosol,negative regulation of type I interferon production,negative regulation of RIG-I signaling pathway,error-free translesion synthesis
0.847739	0.0157508	0.0220291	P51858	HDGF	Hepatoma-derived growth factor	9	extracellular region,extracellular space,nucleoplasm,cytoplasm,transcriptional repressor complex,extracellular matrix	nucleotide binding,RNA polymerase II transcription corepressor activity,transcription corepressor binding,DNA binding,RNA binding,growth factor activity,heparin binding	negative regulation of transcription from RNA polymerase II promoter,transcription, DNA-templated,signal transduction,cell proliferation,regulation of receptor activity,IRE1-mediated unfolded protein response
0.846817	5.95707e-06	2.40482e-05	O95997;Q9NZH5	PTTG1;PTTG2	Securin;Securin-2	2	nucleus,cytoplasm,cytosol;nucleus,cytoplasm	RNA polymerase II transcription factor activity, sequence-specific DNA binding,transcription factor activity, sequence-specific DNA binding,cysteine-type endopeptidase inhibitor activity,protein binding,SH3 domain binding,peptidase inhibitor activity;molecular_function,SH3 domain binding,peptidase inhibitor activity	DNA repair,regulation of transcription from RNA polymerase II promoter,transcription from RNA polymerase II promoter,spermatogenesis,negative regulation of endopeptidase activity,anaphase-promoting complex-dependent catabolic process,protein ubiquitination involved in ubiquitin-dependent protein catabolic process,homologous chromosome segregation,chromosome organization,cell division,negative reg…
0.846093	0.00319911	0.00600691	Q15386	UBE3C	Ubiquitin-protein ligase E3C	8	proteasome complex,intracellular,nucleus,cytoplasm	ubiquitin-protein transferase activity,protein binding,ubiquitin protein ligase activity	protein polyubiquitination
0.844703	0.18172	0.142207	O15054	KDM6B	Lysine-specific demethylase 6B	1	nucleus,nucleoplasm	chromatin binding,protein binding,beta-catenin binding,histone demethylase activity,sequence-specific DNA binding,metal ion binding,dioxygenase activity,histone demethylase activity (H3-K27 specific)	inflammatory response to antigenic stimulus,chromatin remodeling,response to activity,hippocampus development,cell fate commitment,endothelial cell differentiation,positive regulation of transcription from RNA polymerase II promoter,mesodermal cell differentiation,cardiac muscle cell differentiation,oxidation-reduction process,response to fungicide,cellular response to hydrogen peroxide,histone H…
0.84338	0.000462041	0.00113883	P49005	POLD2	DNA polymerase delta subunit 2	8	nucleus,nucleoplasm,delta DNA polymerase complex	DNA binding,DNA-directed DNA polymerase activity,protein binding	telomere maintenance,DNA replication,DNA ligation,DNA strand elongation involved in DNA replication,transcription-coupled nucleotide-excision repair,nucleotide-excision repair, DNA incision, 5'-to lesion,nucleotide-excision repair, DNA gap filling,mismatch repair,cellular response to DNA damage stimulus,translesion synthesis,telomere maintenance via semi-conservative replication,nucleotide-excisi…
0.843291	0.0739205	0.0728793	Q96BT3	CENPT	Centromere protein T	1	chromosome, centromeric region,kinetochore,condensed chromosome kinetochore,nuclear nucleosome,nucleus,nucleoplasm,cytosol,nuclear body	DNA binding,protein binding,histone binding,protein heterodimerization activity	mitotic cell cycle,chromosome segregation,sister chromatid cohesion,CENP-A containing nucleosome assembly,chromosome organization,cell division,kinetochore assembly,protein localization to kinetochore involved in kinetochore assembly
0.842896	0.326161	0.215654	Q99865;Q9BPZ2	SPIN2A;SPIN2B	Spindlin-2A;Spindlin-2B	1	cellular_component,nucleoplasm,cytosol;nucleoplasm,cytosol	molecular_function,protein binding,methylated histone binding;protein binding,methylated histone binding	cell cycle,gamete generation,regulation of cell cycle;apoptotic process,cell cycle,gamete generation,regulation of cell cycle
0.84101	2.24219e-06	9.91494e-06	Q9BXS6	NUSAP1	Nucleolar and spindle-associated protein 1	5	chromosome,nucleolus,cytoplasm,spindle microtubule	DNA binding,RNA binding,protein binding,microtubule binding	mitotic sister chromatid segregation,mitotic cytokinesis,mitotic chromosome condensation,establishment of mitotic spindle localization,positive regulation of mitotic nuclear division
0.840805	0.12926	0.110898	A8MQ14	ZNF850	Zinc finger protein 850	5	nucleus	DNA binding,metal ion binding	transcription, DNA-templated,regulation of transcription, DNA-templated
0.838356	0.000994722	0.00221263	P46777	RPL5	60S ribosomal protein L5	12	nucleus,nucleoplasm,nucleolus,cytoplasm,endoplasmic reticulum,cytosol,focal adhesion,membrane,cytosolic large ribosomal subunit,intracellular ribonucleoprotein complex,protein complex,extracellular exosome	RNA binding,mRNA 3'-UTR binding,structural constituent of ribosome,protein binding,5S rRNA binding,ubiquitin protein ligase binding,mRNA 5'-UTR binding,ubiquitin ligase inhibitor activity	ribosomal large subunit assembly,nuclear-transcribed mRNA catabolic process, nonsense-mediated decay,rRNA processing,translation,translational initiation,SRP-dependent cotranslational protein targeting to membrane,positive regulation of gene expression,viral transcription,ribosomal large subunit biogenesis,positive regulation of translation,protein stabilization,regulation of signal transduction …
0.837798	0.00496617	0.00862395	Q9H6F5	CCDC86	Coiled-coil domain-containing protein 86	11	nucleus,nucleolus	RNA binding,protein binding	viral process
0.837352	0.00844385	0.0133004	P31271	HOXA13	Homeobox protein Hox-A13	5	nucleus	DNA binding,sequence-specific DNA binding	skeletal system development,transcription, DNA-templated,regulation of transcription, DNA-templated
0.836873	0.0016658	0.00345602	P14625	HSP90B1	Endoplasmin	19	extracellular region,nucleus,endoplasmic reticulum,endoplasmic reticulum lumen,endoplasmic reticulum membrane,cytosol,plasma membrane,focal adhesion,membrane,midbody,extracellular matrix,endoplasmic reticulum chaperone complex,melanosome,protein complex,perinuclear region of cytoplasm,extracellular exosome,endocytic vesicle lumen	RNA binding,calcium ion binding,protein binding,ATP binding,protein phosphatase binding,low-density lipoprotein particle receptor binding,unfolded protein binding	response to hypoxia,toll-like receptor signaling pathway,receptor-mediated endocytosis,protein transport,ER-associated ubiquitin-dependent protein catabolic process,retrograde protein transport, ER to cytosol,actin rod assembly,protein folding in endoplasmic reticulum,response to endoplasmic reticulum stress,ATF6-mediated unfolded protein response,negative regulation of apoptotic process,regulati…
0.836471	0.00128485	0.00276908	O95905	ECD	Protein ecdysoneless homolog	10	nucleus,nucleoplasm,cytoplasm,cytosol,R2TP complex	transcription coactivator activity,protein binding,histone acetyltransferase binding	regulation of glycolytic process,transcription from RNA polymerase II promoter,mRNA processing,cell proliferation,RNA splicing,positive regulation of transcription from RNA polymerase II promoter,regulation of G1/S transition of mitotic cell cycle
0.836157	8.9488e-09	5.90402e-08	Q9UKB1	FBXW11	F-box/WD repeat-containing protein 11	11	ubiquitin ligase complex,nucleus,centrosome,cytosol,SCF ubiquitin ligase complex	ubiquitin-protein transferase activity,protein binding,protein dimerization activity,ubiquitin protein ligase activity	G2/M transition of mitotic cell cycle,protein polyubiquitination,stimulatory C-type lectin receptor signaling pathway,protein dephosphorylation,Wnt signaling pathway,protein ubiquitination,SCF-dependent proteasomal ubiquitin-dependent protein catabolic process,protein destabilization,NIK/NF-kappaB signaling,Fc-epsilon receptor signaling pathway,negative regulation of NF-kappaB import into nucleus…
0.833385	0.219839	0.163327	O75467	ZNF324	Zinc finger protein 324A	2	nucleus	DNA binding,metal ion binding	transcription, DNA-templated,regulation of transcription, DNA-templated
0.83194	0.306946	0.206864	Q9H2V7	SPNS1	Protein spinster homolog 1	2	mitochondrial inner membrane,lysosomal membrane,integral component of membrane,vesicle	protein binding,sphingolipid transporter activity	sphingosine-1-phosphate signaling pathway,lipid transport,locomotion,transmembrane transport
0.830633	0.110988	0.0988569	Q9Y5S9	RBM8A	RNA-binding protein 8A	8	nucleus,nucleoplasm,cytoplasm,cytosol,nuclear speck,dendrite,exon-exon junction complex,neuronal cell body,catalytic step 2 spliceosome	RNA binding,mRNA binding,protein binding	nuclear-transcribed mRNA catabolic process, nonsense-mediated decay,regulation of alternative mRNA splicing, via spliceosome,mRNA splicing, via spliceosome,termination of RNA polymerase II transcription,RNA export from nucleus,mRNA export from nucleus,regulation of translation,mRNA 3'-end processing
0.827318	0.00488057	0.00850273	Q9Y2K1	ZBTB1	Zinc finger and BTB domain-containing protein 1	7	nucleus,nucleoplasm,nuclear body,nuclear membrane	DNA binding,protein binding,protein homodimerization activity,metal ion binding,protein heterodimerization activity,K63-linked polyubiquitin binding	negative regulation of transcription from RNA polymerase II promoter,positive regulation of T cell mediated immunity,DNA repair,chromatin remodeling,cellular response to DNA damage stimulus,translesion synthesis,B cell differentiation,positive regulation of natural killer cell differentiation,T cell differentiation in thymus,cellular response to UV,mRNA transcription from RNA polymerase II promot…
0.82694	6.89293e-10	5.45203e-09	Q9NRG9	AAAS	Aladin	9	nucleus,nuclear envelope,nuclear pore,nucleoplasm,centrosome,cytosol,membrane,nuclear membrane,host cell	molecular_function	regulation of glycolytic process,mRNA export from nucleus,tRNA export from nucleus,nucleocytoplasmic transport,mitotic nuclear envelope disassembly,learning,fertilization,viral process,protein sumoylation,viral transcription,regulation of nucleocytoplasmic transport,regulation of gene silencing by miRNA,intracellular transport of virus,regulation of cellular response to heat
0.826932	0.12178	0.106133	P11801	PSKH1	Serine/threonine-protein kinase H1	1	cellular_component,intracellular,nucleoplasm,endoplasmic reticulum membrane,Golgi apparatus,microtubule organizing center,plasma membrane,nuclear speck	protein serine/threonine kinase activity,protein binding,ATP binding	determination of left/right symmetry,heart development,peptidyl-serine phosphorylation,peptidyl-threonine phosphorylation,intracellular signal transduction
0.82545	7.22563e-12	7.38385e-11	P25205	MCM3	DNA replication licensing factor MCM3	24	nuclear chromosome, telomeric region,nucleus,nucleoplasm,alpha DNA polymerase:primase complex,centrosome,membrane,MCM complex,perinuclear region of cytoplasm,nucleolus	DNA binding,helicase activity,protein binding,ATP binding	G1/S transition of mitotic cell cycle,DNA replication,DNA replication initiation
0.82532	0.205147	0.155297	Q86XK2	FBXO11	F-box only protein 11	1	ubiquitin ligase complex,nucleus,chromosome,nucleolus,cytoplasm,cytosol	ubiquitin-protein transferase activity,protein binding,zinc ion binding,protein-arginine N-methyltransferase activity	protein polyubiquitination,cellular protein modification process,ubiquitin-dependent protein catabolic process,sensory perception of sound,protein ubiquitination,peptidyl-arginine N-methylation,post-translational protein modification
0.824555	0.757066	0.378776	Q9GZS1	POLR1E	DNA-directed RNA polymerase I subunit RPA49	3	fibrillar center,nucleus,nucleoplasm,nucleolus,DNA-directed RNA polymerase I complex	RNA polymerase I transcription factor binding,DNA binding,RNA polymerase I activity	RNA polymerase I transcriptional preinitiation complex assembly at the promoter for the nuclear large rRNA transcript,transcription initiation from RNA polymerase I promoter,transcription elongation from RNA polymerase I promoter,termination of RNA polymerase I transcription,rRNA transcription,positive regulation of gene expression, epigenetic
0.821574	4.27458e-21	1.0499e-19	Q96JI7	SPG11	Spatacsin	47	nucleolus,cytoplasm,lysosomal membrane,cytosol,plasma membrane,axon,dendrite,cytoplasmic vesicle,synapse,extracellular exosome	protein binding	chemical synaptic transmission,axo-dendritic transport,synaptic vesicle transport,axon extension,phagosome-lysosome fusion involved in apoptotic cell clearance,walking behavior
0.820849	0.070726	0.0704029	Q9H0W5	CCDC8	Coiled-coil domain-containing protein 8	5	nucleus,cytoplasm,centrosome,cytosol,plasma membrane,3M complex	protein binding	microtubule cytoskeleton organization,regulation of mitotic nuclear division,negative regulation of phosphatase activity,post-translational protein modification
0.820231	0.318889	0.212408	Q8WW38	ZFPM2	Zinc finger protein ZFPM2	1	nucleus,nucleoplasm,cytoplasm	transcriptional repressor activity, RNA polymerase II core promoter proximal region sequence-specific binding,RNA polymerase II transcription factor binding,RNA polymerase II transcription coactivator activity,DNA binding,transcription corepressor activity,protein binding,transcription factor binding,zinc ion binding	negative regulation of transcription from RNA polymerase II promoter,vasculogenesis,in utero embryonic development,outflow tract septum morphogenesis,right ventricular cardiac muscle tissue morphogenesis,transcription from RNA polymerase II promoter,gonadal mesoderm development,blood coagulation,lung development,negative regulation of fat cell differentiation,negative regulation of transcription,…
0.817616	0.776805	0.384733	Q8IYI6	EXOC8	Exocyst complex component 8	4	exocyst,late endosome,cytosol,plasma membrane,membrane,growth cone,cell leading edge,perinuclear region of cytoplasm	protein binding,Ral GTPase binding	exocyst assembly,endosome organization,protein transport,regulation of macroautophagy,extracellular matrix disassembly,exocyst localization
0.817426	0.278529	0.193384	P61758	VBP1	Prefoldin subunit 3	11	nucleus,cytoplasm,cytosol,polysome,prefoldin complex,intracellular membrane-bounded organelle	protein binding,tubulin binding	protein folding,microtubule-based process,tubulin complex assembly
0.816586	0.00866685	0.0135662	Q8IWP9	CCDC28A	Coiled-coil domain-containing protein 28A	1		protein binding
0.81654	0.105541	0.0950817	Q8IXH7	NELFCD	Negative elongation factor C/D	1	nucleoplasm,membrane,NELF complex	RNA binding,protein binding	transcription from RNA polymerase II promoter,transcription elongation from RNA polymerase II promoter,negative regulation of transcription, DNA-templated,positive regulation of viral transcription
0.814026	0.00133378	0.00284995	Q14CB8	ARHGAP19	Rho GTPase-activating protein 19	5	nucleus,cytosol,plasma membrane,intracellular membrane-bounded organelle	GTPase activator activity	signal transduction,positive regulation of GTPase activity,regulation of small GTPase mediated signal transduction
0.813978	0.0573947	0.0602524	O94953	KDM4B	Lysine-specific demethylase 4B	4	nucleoplasm	histone demethylase activity,histone demethylase activity (H3-K9 specific),metal ion binding,histone demethylase activity (H3-K36 specific)	transcription, DNA-templated,regulation of transcription, DNA-templated,histone H3-K9 demethylation,oxidation-reduction process,histone H3-K36 demethylation
0.813949	0.00066452	0.00156885	O14628	ZNF195	Zinc finger protein 195	6	nucleus	DNA binding,zinc ion binding	transcription, DNA-templated,regulation of transcription, DNA-templated
0.81291	0.503195	0.290323	Q96HU1	SGSM3	Small G protein signaling modulator 3	3	cytosol,gap junction,endomembrane system	GTPase activator activity,protein binding,Rab GTPase binding	intracellular protein transport,cell cycle arrest,regulation of vesicle fusion,regulation of Rab protein signal transduction,Rap protein signal transduction,positive regulation of GTPase activity,positive regulation of protein catabolic process,plasma membrane to endosome transport,activation of GTPase activity,regulation of cilium assembly
0.81274	0.0473221	0.052081	Q9NX63	CHCHD3	MICOS complex subunit MIC19	3	nucleus,cytoplasm,mitochondrion,mitochondrial inner membrane,MICOS complex,extracellular exosome	transcriptional repressor activity, RNA polymerase II transcription regulatory region sequence-specific binding,protein binding,phosphatase binding,protein complex scaffold	negative regulation of transcription from RNA polymerase II promoter,transcription, DNA-templated,inner mitochondrial membrane organization,mitochondrial fusion,cristae formation
0.811344	0.0167962	0.0231617	Q14011	CIRBP	Cold-inducible RNA-binding protein	4	nucleus,nucleoplasm,nucleolus,cytoplasm,cytoplasmic stress granule	RNA binding,mRNA 3'-UTR binding,protein binding,translation repressor activity,small ribosomal subunit rRNA binding	response to cold,response to UV,negative regulation of translation,stress granule assembly,positive regulation of translation,mRNA stabilization
0.811127	5.89016e-06	2.38468e-05	P06493	CDK1	Cyclin-dependent kinase 1	17	cyclin-dependent protein kinase holoenzyme complex,nuclear chromosome, telomeric region,nucleus,nucleoplasm,mitochondrion,endoplasmic reticulum membrane,centrosome,cytosol,spindle microtubule,membrane,midbody,extracellular exosome,mitotic spindle,cyclin B1-CDK1 complex,mitochondrial matrix	virus receptor activity,chromatin binding,protein kinase activity,protein serine/threonine kinase activity,cyclin-dependent protein serine/threonine kinase activity,protein binding,ATP binding,RNA polymerase II carboxy-terminal domain kinase activity,cyclin binding,Hsp70 protein binding,histone kinase activity,cyclin-dependent protein kinase activity	G2/M transition of mitotic cell cycle,activation of MAPK activity,microtubule cytoskeleton organization,DNA replication,DNA repair,transcription initiation from RNA polymerase II promoter,protein complex assembly,protein phosphorylation,apoptotic process,DNA damage response, signal transduction by p53 class mediator resulting in cell cycle arrest,mitotic nuclear envelope disassembly,mitotic G2 DN…
0.810886	4.03286e-07	2.02947e-06	Q16186	ADRM1	Proteasomal ubiquitin receptor ADRM1	10	proteasome complex,nucleoplasm,cytosol,plasma membrane,integral component of plasma membrane,proteasome regulatory particle, lid subcomplex,membrane	protease binding,protein binding,ubiquitin binding,endopeptidase activator activity,proteasome binding	transcription elongation from RNA polymerase II promoter,ubiquitin-dependent protein catabolic process,positive regulation of endopeptidase activity,protein deubiquitination,proteasome assembly
0.810669	0.0213423	0.0280345	Q92569	PIK3R3	Phosphatidylinositol 3-kinase regulatory subunit gamma	8	cytosol,phosphatidylinositol 3-kinase complex	phosphotyrosine binding,protein binding,1-phosphatidylinositol-3-kinase activity,1-phosphatidylinositol-3-kinase regulator activity	phosphatidylinositol biosynthetic process,insulin receptor signaling pathway,phosphatidylinositol-3-phosphate biosynthetic process,regulation of phosphatidylinositol 3-kinase activity,positive regulation of glucose import in response to insulin stimulus
0.809862	0.000342629	0.000876931	Q9BTT0	ANP32E	Acidic leucine-rich nuclear phosphoprotein 32 family member E	3	Swr1 complex,nucleus,cytoplasmic vesicle	phosphatase inhibitor activity,histone binding	nucleosome assembly,nucleocytoplasmic transport,chromatin modification,regulation of apoptotic process,negative regulation of catalytic activity,histone exchange
0.809651	0.000163775	0.000456925	Q15269	PWP2	Periodic tryptophan protein 2 homolog	23	nucleoplasm,small-subunit processome,Pwp2p-containing subcomplex of 90S preribosome	RNA binding,snoRNA binding	ribosomal small subunit assembly,maturation of SSU-rRNA from tricistronic rRNA transcript (SSU-rRNA, 5.8S rRNA, LSU-rRNA),rRNA processing
0.809041	0.0877608	0.0827379	Q13098	GPS1	COP9 signalosome complex subunit 1	11	nucleoplasm,cytosol,COP9 signalosome	GTPase inhibitor activity,protein binding	inactivation of MAPK activity,protein deneddylation,nucleotide-excision repair, DNA damage recognition,transcription-coupled nucleotide-excision repair,cell cycle,JNK cascade,negative regulation of GTPase activity,post-translational protein modification
0.808337	8.15057e-14	1.05266e-12	Q9H583	HEATR1	HEAT repeat-containing protein 1	59	fibrillar center,nucleoplasm,nucleolus,mitochondrion,membrane,90S preribosome,small-subunit processome,t-UTP complex	RNA binding,protein binding,snoRNA binding	maturation of SSU-rRNA from tricistronic rRNA transcript (SSU-rRNA, 5.8S rRNA, LSU-rRNA),transcription, DNA-templated,rRNA processing,positive regulation of transcription from RNA polymerase I promoter,positive regulation of rRNA processing
0.808286	0.000320768	0.000828248	Q8IW41	MAPKAPK5	MAP kinase-activated protein kinase 5	4	nucleus,nucleoplasm,cytoplasm,cytosol	p53 binding,protein serine/threonine kinase activity,calmodulin-dependent protein kinase activity,MAP kinase kinase activity,protein binding,calmodulin binding,ATP binding,calcium-dependent protein serine/threonine kinase activity,mitogen-activated protein kinase binding	MAPK cascade,activation of MAPK activity,regulation of translation,signal transduction,cell surface receptor signaling pathway,Ras protein signal transduction,peptidyl-serine phosphorylation,negative regulation of TOR signaling,positive regulation of telomere maintenance via telomerase,protein autophosphorylation,positive regulation of telomerase activity,stress-induced premature senescence,regul…
0.807624	0.0087315	0.0136369	Q8WXX7	AUTS2	Autism susceptibility gene 2 protein	5	cellular_component,nucleus,cytoplasm,growth cone,actin cytoskeleton	molecular_function,chromatin binding,protein binding	neuron migration,transcription, DNA-templated,biological_process,positive regulation of lamellipodium assembly,actin cytoskeleton reorganization,positive regulation of Rac protein signal transduction,positive regulation of transcription from RNA polymerase II promoter,axon extension,positive regulation of histone H3-K4 methylation,righting reflex,dendrite extension,innate vocalization behavior,po…
0.807435	0.0501151	0.0543296	Q5T2S8	ARMC4	Armadillo repeat-containing protein 4	5	nucleus,cytoplasm,axoneme,ciliary base		cilium movement,regulation of cilium beat frequency,determination of left/right symmetry,heart development,ventricular system development,outer dynein arm assembly
0.807051	0.153602	0.126125	O00506	STK25	Serine/threonine-protein kinase 25	2	Golgi membrane,cytoplasm,extracellular exosome,Golgi apparatus	protein kinase activity,protein binding,ATP binding,MAP kinase kinase kinase kinase activity,protein homodimerization activity,metal ion binding	MAPK cascade,activation of MAPKKK activity,protein phosphorylation,response to oxidative stress,establishment or maintenance of cell polarity,signal transduction,regulation of mitotic cell cycle,positive regulation of stress-activated MAPK cascade,intrinsic apoptotic signaling pathway in response to hydrogen peroxide,response to hydrogen peroxide,regulation of apoptotic process,protein autophosph…
0.806842	0.00388494	0.00704705	Q9Y3M2	CBY1	Protein chibby homolog 1	4	nucleus,nucleoplasm,trans-Golgi network,centriole,cytosol,nuclear speck,cell projection	protein binding,beta-catenin binding,identical protein binding,protein homodimerization activity	protein localization,cell projection organization,negative regulation of Wnt signaling pathway,fat cell differentiation,negative regulation of transcription, DNA-templated,protein homotetramerization,cardiac muscle cell differentiation
0.806366	0.0379683	0.0440395	Q969H6	POP5	Ribonuclease P/MRP protein subunit POP5	2	ribonuclease MRP complex,nucleoplasm,nucleolar ribonuclease P complex,multimeric ribonuclease P complex	protein binding,ribonuclease P activity	tRNA 5'-leader removal,protein lipoylation,RNA phosphodiester bond hydrolysis, endonucleolytic
0.805506	7.63645e-15	1.09315e-13	Q9Y6G5	COMMD10	COMM domain-containing protein 10	9	nucleus,cytoplasm	protein binding	transcription, DNA-templated,regulation of transcription, DNA-templated
0.805178	0.000958792	0.00214563	P29590	PML	Protein PML	6	nuclear chromosome, telomeric region,heterochromatin,nucleus,nucleoplasm,nucleolus,cytoplasm,cytosol,nuclear matrix,PML body,early endosome membrane,extrinsic component of endoplasmic reticulum membrane	DNA binding,protein binding,zinc ion binding,ubiquitin protein ligase binding,SUMO binding,protein homodimerization activity,SMAD binding	response to hypoxia,regulation of protein phosphorylation,transcription, DNA-templated,regulation of transcription, DNA-templated,protein complex assembly,protein import into nucleus,activation of cysteine-type endopeptidase activity involved in apoptotic process,DNA damage response, signal transduction by p53 class mediator resulting in cell cycle arrest,cell cycle arrest,transforming growth fac…
0.8039	2.64756e-15	3.92646e-14	Q07864	POLE	DNA polymerase epsilon catalytic subunit A	47	nucleus,nucleoplasm,plasma membrane,epsilon DNA polymerase complex	nucleotide binding,DNA binding,chromatin binding,DNA-directed DNA polymerase activity,protein binding,zinc ion binding,single-stranded DNA 3'-5' exodeoxyribonuclease activity,4 iron, 4 sulfur cluster binding	G1/S transition of mitotic cell cycle,DNA synthesis involved in DNA repair,DNA replication,DNA replication initiation,leading strand elongation,base-excision repair, gap-filling,nucleotide-excision repair, DNA gap filling,telomere maintenance via semi-conservative replication,DNA replication proofreading,embryonic organ development,nucleic acid phosphodiester bond hydrolysis
0.803716	0.76392	0.381001	O15320	CTAGE5	cTAGE family member 5	2	endoplasmic reticulum membrane,membrane,integral component of membrane,endoplasmic reticulum exit site	protein binding,enzyme activator activity	ER to Golgi vesicle-mediated transport,protein exit from endoplasmic reticulum,cargo loading into vesicle,positive regulation of catalytic activity,protein localization to endoplasmic reticulum exit site,regulation of guanyl-nucleotide exchange factor activity
0.802954	1.72085e-10	1.47803e-09	O15417	TNRC18	Trinucleotide repeat-containing gene 18 protein	25	chromatin,nucleus,nucleoplasm,chromatin silencing complex,mitochondrion,cytosol,nuclear membrane	transcription regulatory region sequence-specific DNA binding,chromatin binding	chromatin silencing,heterochromatin assembly
0.802376	0.100514	0.0917216	Q5T1V6	DDX59	Probable ATP-dependent RNA helicase DDX59	3	intracellular,nucleolus,cytoplasm	RNA binding,ATP-dependent RNA helicase activity,ATP binding,metal ion binding	RNA secondary structure unwinding
0.800367	0.264812	0.187146	Q9NWM0	SMOX	Spermine oxidase	1	nucleoplasm,cytosol,nuclear membrane,intracellular membrane-bounded organelle	polyamine oxidase activity,norspermine:oxygen oxidoreductase activity,N1-acetylspermine:oxygen oxidoreductase (N1-acetylspermidine-forming) activity,spermine:oxygen oxidoreductase (spermidine-forming) activity	polyamine biosynthetic process,polyamine catabolic process,spermine catabolic process,oxidation-reduction process
0.799485	0.00243758	0.00476488	Q13617	CUL2	Cullin-2	6	nucleoplasm,nucleolus,cytosol,VCB complex,Cul2-RING ubiquitin ligase complex	protein binding,ubiquitin protein ligase binding,protein complex binding,ubiquitin protein ligase activity	G1/S transition of mitotic cell cycle,cell cycle arrest,negative regulation of cell proliferation,viral process,protein ubiquitination,protein ubiquitination involved in ubiquitin-dependent protein catabolic process,post-translational protein modification,regulation of transcription from RNA polymerase II promoter in response to hypoxia,intrinsic apoptotic signaling pathway
0.798283	1.09529e-26	3.79554e-25	P05023	ATP1A1	Sodium/potassium-transporting ATPase subunit alpha-1	30	endosome,endoplasmic reticulum,Golgi apparatus,plasma membrane,sodium:potassium-exchanging ATPase complex,caveola,postsynaptic density,intercalated disc,membrane,integral component of membrane,basolateral plasma membrane,apical plasma membrane,T-tubule,sarcolemma,melanosome,myelin sheath,protein complex,extracellular exosome,extracellular vesicle	sodium:potassium-exchanging ATPase activity,protein binding,ATP binding,phosphatase activity,protein kinase binding,protein domain specific binding,ankyrin binding,potassium ion binding,sodium ion binding,ADP binding,phosphatidylinositol 3-kinase binding,chaperone binding,steroid hormone binding	regulation of the force of heart contraction,regulation of sodium ion transport,cellular sodium ion homeostasis,regulation of blood pressure,potassium ion import,establishment or maintenance of transmembrane electrochemical gradient,dephosphorylation,cellular potassium ion homeostasis,negative regulation of glucocorticoid biosynthetic process,ion transmembrane transport,sodium ion export from cel…
0.797623	0.000444101	0.00110121	Q6P0N0	MIS18BP1	Mis18-binding protein 1	8	condensed nuclear chromosome kinetochore,nucleoplasm	DNA binding,protein binding	cell cycle,CENP-A containing nucleosome assembly,cell division
0.79756	6.15871e-05	0.000191775	Q13895	BYSL	Bystin	14	nucleus,nucleoplasm,nucleolus,cytoplasm,cytosol,membrane,intracellular membrane-bounded organelle,apical part of cell	RNA binding,protein binding	maturation of SSU-rRNA from tricistronic rRNA transcript (SSU-rRNA, 5.8S rRNA, LSU-rRNA),trophectodermal cell differentiation,rRNA processing,cell adhesion,female pregnancy,cell proliferation
0.797499	0.127874	0.110034	O43583	DENR	Density-regulated protein	4	cellular_component,translation initiation complex,ribosome	molecular_function,mRNA binding,translation initiation factor activity,protein binding,ribosome binding	formation of translation preinitiation complex,translation reinitiation,ribosome disassembly,IRES-dependent viral translational initiation
0.796474	0.0962924	0.0888892	Q02750	MAP2K1	Dual specificity mitogen-activated protein kinase kinase 1	3	nucleus,mitochondrion,early endosome,late endosome,endoplasmic reticulum,Golgi apparatus,microtubule organizing center,cytosol,plasma membrane,focal adhesion,extracellular exosome	protein kinase activity,protein serine/threonine kinase activity,MAP kinase kinase activity,protein serine/threonine/tyrosine kinase activity,protein tyrosine kinase activity,receptor signaling protein tyrosine phosphatase activity,protein binding,ATP binding,protein C-terminus binding,protein serine/threonine kinase activator activity,protein N-terminus binding,scaffold protein binding	MAPK cascade,activation of MAPK activity,protein phosphorylation,movement of cell or subcellular component,chemotaxis,cell cycle arrest,signal transduction,regulation of mitotic cell cycle,heart development,negative regulation of cell proliferation,positive regulation of gene expression,negative regulation of gene expression,peptidyl-threonine phosphorylation,peptidyl-tyrosine phosphorylation,cer…
0.795975	0.132405	0.112932	Q96DY7	MTBP	Mdm2-binding protein	4	kinetochore,chromatin		cell cycle arrest,traversing start control point of mitotic cell cycle,negative regulation of cell proliferation,protein localization to kinetochore,negative regulation of mitotic nuclear division
0.795762	0.075276	0.0738413	P43897	TSFM	Elongation factor Ts, mitochondrial	2	nucleus,mitochondrion,mitochondrial matrix	RNA binding,translation elongation factor activity,protein binding	translational elongation,regulation of DNA-templated transcription, elongation,mitochondrial translational elongation,regulation of mitochondrial translation
0.795154	0.237535	0.1727	Q7L0Y3	TRMT10C	Mitochondrial ribonuclease P protein 1	2	nucleoplasm,mitochondrion,mitochondrial matrix,mitochondrial ribonuclease P complex,mitochondrial nucleoid	tRNA binding,RNA binding,protein binding,tRNA (guanine-N1-)-methyltransferase activity,tRNA (adenine-N1-)-methyltransferase activity,tRNA (guanine(9)-N(1))-methyltransferase activity,Requires Ontology	mitochondrial RNA 5'-end processing,positive regulation of mitochondrial translation,mitochondrial tRNA methylation,mRNA methylation,mitochondrial tRNA processing,Requires Ontology,mitochondrial tRNA 3'-end processing
0.794909	8.44076e-05	0.000252934	Q6P1M9	ARMCX5	Armadillo repeat-containing X-linked protein 5	5		protein binding
0.794041	0.00181991	0.00373588	Q9Y2X0	MED16	Mediator of RNA polymerase II transcription subunit 16	2	nucleus,nucleoplasm,membrane,mediator complex	transcription cofactor activity,transcription coactivator activity,catalytic activity,receptor activity,protein binding,thyroid hormone receptor coactivator activity,vitamin D receptor binding,thyroid hormone receptor binding	regulation of transcription from RNA polymerase II promoter,transcription from RNA polymerase II promoter,transcription initiation from RNA polymerase II promoter,intracellular steroid hormone receptor signaling pathway,androgen receptor signaling pathway,positive regulation of transcription, DNA-templated
0.793712	0.724639	0.368448	Q9BYT3	STK33	Serine/threonine-protein kinase 33	5	intracellular,perinuclear region of cytoplasm	protein serine/threonine kinase activity,ATP binding	peptidyl-serine phosphorylation,peptidyl-threonine phosphorylation,intracellular signal transduction,protein autophosphorylation
0.793696	0.0276394	0.0343443	P07237	P4HB	Protein disulfide-isomerase	12	extracellular region,endoplasmic reticulum,endoplasmic reticulum lumen,endoplasmic reticulum-Golgi intermediate compartment,focal adhesion,external side of plasma membrane,procollagen-proline 4-dioxygenase complex,extracellular matrix,endoplasmic reticulum chaperone complex,melanosome,extracellular exosome	RNA binding,protein disulfide isomerase activity,integrin binding,protein binding,peptide disulfide oxidoreductase activity,enzyme binding,protein heterodimerization activity,procollagen-proline 4-dioxygenase activity	protein folding,peptidyl-proline hydroxylation to 4-hydroxy-L-proline,chylomicron assembly,very-low-density lipoprotein particle assembly,cellular response to oxidative stress,response to endoplasmic reticulum stress,interleukin-12-mediated signaling pathway,post-translational protein modification,cellular protein metabolic process,cell redox homeostasis,positive regulation of viral entry into ho…
0.790068	0.000543422	0.00131298	Q14680	MELK	Maternal embryonic leucine zipper kinase	9	nucleus,plasma membrane,cell cortex,membrane	protein serine/threonine kinase activity,non-membrane spanning protein tyrosine kinase activity,calcium ion binding,protein binding,ATP binding,lipid binding	G2/M transition of mitotic cell cycle,apoptotic process,cell proliferation,intrinsic apoptotic signaling pathway in response to oxidative stress,peptidyl-tyrosine phosphorylation,hemopoiesis,intracellular signal transduction,positive regulation of apoptotic process,protein autophosphorylation,neural precursor cell proliferation
0.790054	0.00361189	0.0066395	O43390	HNRNPR	Heterogeneous nuclear ribonucleoprotein R	32	nucleoplasm,spliceosomal complex,endoplasmic reticulum,dendrite,growth cone,intracellular ribonucleoprotein complex,axon terminus,catalytic step 2 spliceosome,nucleolus	RNA binding,mRNA 3'-UTR binding,protein binding	mRNA splicing, via spliceosome,mRNA processing,circadian rhythm,RNA metabolic process,negative regulation of catalytic activity,mRNA destabilization
0.788053	1.85031e-13	2.30466e-12	O43683	BUB1	Mitotic checkpoint serine/threonine-protein kinase BUB1	33	kinetochore,condensed chromosome kinetochore,condensed nuclear chromosome outer kinetochore,nucleoplasm,cytosol,membrane	protein kinase activity,protein serine/threonine kinase activity,protein binding,ATP binding	protein phosphorylation,apoptotic process,sister chromatid cohesion,regulation of sister chromatid cohesion,mitotic cell cycle checkpoint,mitotic spindle assembly checkpoint,cell proliferation,viral process,cell division,meiotic sister chromatid cohesion, centromeric,regulation of chromosome segregation
0.786891	3.09196e-10	2.55534e-09	Q96CS3	FAF2	FAS-associated factor 2	4	extracellular region,endoplasmic reticulum,lipid particle,VCP-NPL4-UFD1 AAA ATPase complex,azurophil granule lumen	protein binding,ubiquitin protein ligase binding,lipase binding,ubiquitin binding,lipase inhibitor activity	response to unfolded protein,ER-associated ubiquitin-dependent protein catabolic process,retrograde protein transport, ER to cytosol,lipid particle organization,negative regulation of catalytic activity,neutrophil degranulation
0.786687	0.0145204	0.0206295	Q68E01	INTS3	Integrator complex subunit 3	5	nucleus,nucleoplasm,nucleolus,cytoplasm,integrator complex,SOSS complex	protein binding	DNA repair,cellular response to DNA damage stimulus,mitotic cell cycle checkpoint,response to ionizing radiation,snRNA processing,snRNA transcription from RNA polymerase II promoter
0.784942	0.158195	0.128913	Q96AX1	VPS33A	Vacuolar protein sorting-associated protein 33A	5	lysosomal membrane,early endosome,late endosome,autophagosome,clathrin-coated vesicle,HOPS complex,late endosome membrane,perinuclear region of cytoplasm,AP-3 adaptor complex,clathrin complex	protein binding	vesicle docking involved in exocytosis,endosome to lysosome transport,protein transport,vesicle-mediated transport,platelet formation,melanosome localization,lysosome localization,regulation of lysosomal lumen pH,regulation of developmental pigmentation,autophagosome maturation
0.784603	0.0246579	0.0314113	Q9Y6X9	MORC2	MORC family CW-type zinc finger protein 2	5	nucleus,cytosol	zinc ion binding	fatty acid metabolic process
0.78383	0.0967213	0.089191	Q9Y3E1	HDGFRP3	Hepatoma-derived growth factor-related protein 3	4	extracellular region,nucleus,nucleoplasm,cytosol	microtubule binding,growth factor activity,tubulin binding	negative regulation of microtubule depolymerization,cell proliferation,regulation of receptor activity,neuron projection development,microtubule polymerization
0.781447	0.264904	0.187174	Q86VI3	IQGAP3	Ras GTPase-activating-like protein IQGAP3	2	cytosol,cell-cell junction,lateral plasma membrane	calmodulin binding,Rho GTPase binding,myosin VI light chain binding	G1/S transition of mitotic cell cycle,activation of MAPK activity,Ras protein signal transduction,regulation of cell size,positive regulation of gene expression,negative regulation of gene expression,positive regulation of mammary gland epithelial cell proliferation,regulation of GTPase activity,ERK1 and ERK2 cascade,cellular response to organic substance
0.781127	0.0156671	0.0219477	Q460N5	PARP14	Poly [ADP-ribose] polymerase 14	2	nucleus,cytoplasm,cytosol,membrane	RNA binding,NAD+ ADP-ribosyltransferase activity,protein binding,enzyme binding	transcription, DNA-templated,regulation of transcription, DNA-templated,protein ADP-ribosylation,negative regulation of gene expression,positive regulation of tyrosine phosphorylation of STAT protein,negative regulation of tyrosine phosphorylation of STAT protein,innate immune response,negative regulation of interferon-gamma-mediated signaling pathway,positive regulation of interleukin-4-mediated…
0.780511	0.0231442	0.0298966	Q5JUX0;Q9Y657	SPIN3;SPIN1	Spindlin-3;Spindlin-1	2	;nucleus,nucleoplasm,nucleolus,spindle,cytosol,nuclear membrane	protein binding,methylated histone binding;protein binding,methylated histone binding	gamete generation;multicellular organism development,gamete generation,rRNA transcription,Wnt signaling pathway,chromatin modification,positive regulation of Wnt signaling pathway,positive regulation of transcription, DNA-templated,meiotic cell cycle
0.778723	0.00284907	0.00545798	Q86XP1	DGKH	Diacylglycerol kinase eta	14	cytoplasm,endosome,plasma membrane	NAD+ kinase activity,diacylglycerol kinase activity,ATP binding,metal ion binding	protein kinase C-activating G-protein coupled receptor signaling pathway,phosphorylation,platelet activation,intracellular signal transduction,phosphatidic acid metabolic process,protein oligomerization
0.778533	1.48829e-05	5.40355e-05	P14373	TRIM27	Zinc finger protein RFP	14	fibrillar center,nucleus,nucleoplasm,nucleolus,cytoplasm,endosome,early endosome,cytosol,integral component of plasma membrane,membrane,PML body,nuclear membrane,retromer complex	nucleic acid binding,DNA binding,transmembrane receptor protein tyrosine kinase activity,ubiquitin-protein transferase activity,protein binding,zinc ion binding,identical protein binding,metal ion binding,ubiquitin protein ligase activity	negative regulation of transcription from RNA polymerase II promoter,negative regulation of adaptive immune response,transcription, DNA-templated,negative regulation of protein kinase activity,spermatogenesis,cell proliferation,peptidyl-tyrosine phosphorylation,negative regulation of tumor necrosis factor production,negative regulation of viral transcription,Arp2/3 complex-mediated actin nucleati…
0.778513	0.424503	0.259408	Q96PU5	NEDD4L	E3 ubiquitin-protein ligase NEDD4-like	2	intracellular,nucleoplasm,cytoplasm,multivesicular body,Golgi apparatus,cytosol,extracellular exosome,plasma membrane	ubiquitin-protein transferase activity,protein binding,potassium channel regulator activity,sodium channel regulator activity,potassium channel inhibitor activity,sodium channel inhibitor activity,ion channel binding,ubiquitin protein ligase activity	negative regulation of transcription from RNA polymerase II promoter,protein polyubiquitination,regulation of membrane depolarization,protein monoubiquitination,sodium ion transport,cellular sodium ion homeostasis,excretion,response to metal ion,protein ubiquitination,viral life cycle,water homeostasis,ion transmembrane transport,regulation of ion transmembrane transport,regulation of protein cat…
0.77753	0.151306	0.124722	Q9NWY4	C4orf27	UPF0609 protein C4orf27	4	nucleus	protein binding,histone binding	cellular response to DNA damage stimulus,regulation of protein ADP-ribosylation,peptidyl-serine ADP-ribosylation
0.774113	3.42491e-07	1.7474e-06	Q9UBT2	UBA2	SUMO-activating enzyme subunit 2	22	nucleoplasm,cytoplasm,SUMO activating enzyme complex	magnesium ion binding,protein binding,ATP binding,enzyme activator activity,transcription factor binding,SUMO activating enzyme activity,SUMO binding,small protein activating enzyme binding,ubiquitin-like protein conjugating enzyme binding,protein heterodimerization activity	protein sumoylation,positive regulation of catalytic activity
0.773577	0.000529272	0.00128286	O60762	DPM1	Dolichol-phosphate mannosyltransferase subunit 1	5	nucleus,endoplasmic reticulum,endoplasmic reticulum membrane,membrane,dolichol-phosphate-mannose synthase complex	dolichyl-phosphate-mannose-protein mannosyltransferase activity,dolichyl-phosphate beta-D-mannosyltransferase activity,protein binding	GPI anchor biosynthetic process,protein N-linked glycosylation via asparagine,dolichol metabolic process,protein mannosylation,protein O-linked mannosylation
0.773491	3.73923e-05	0.000123001	Q15050	RRS1	Ribosome biogenesis regulatory protein homolog	13	condensed nuclear chromosome,fibrillar center,nucleus,nucleolus,endoplasmic reticulum,preribosome, large subunit precursor	RNA binding,protein binding,5S rRNA binding	ribosomal large subunit assembly,ribosomal large subunit export from nucleus,endonucleolytic cleavage in ITS1 to separate SSU-rRNA from 5.8S rRNA and LSU-rRNA from tricistronic rRNA transcript (SSU-rRNA, 5.8S rRNA, LSU-rRNA),hematopoietic progenitor cell differentiation,mitotic metaphase plate congression,ribosomal large subunit biogenesis,regulation of signal transduction by p53 class mediator,p…
0.772716	0.00323132	0.00605731	Q96EK7	FAM120B	Constitutive coactivator of peroxisome proliferator-activated receptor gamma	8	nucleus	protein binding	transcription, DNA-templated,regulation of transcription, DNA-templated,peroxisome proliferator activated receptor signaling pathway,fat cell differentiation
0.772506	2.77469e-36	1.646e-34	P49454	CENPF	Centromere protein F	85	chromosome, centromeric region,kinetochore,spindle pole,condensed chromosome outer kinetochore,nucleus,nuclear envelope,nucleoplasm,cytoplasm,centrosome,spindle,cytosol,axoneme,nuclear matrix,midbody,ciliary basal body,pronucleus,perinuclear region of cytoplasm,ciliary transition fiber,chromatin	chromatin binding,protein binding,protein C-terminus binding,transcription factor binding,protein homodimerization activity,dynein complex binding	mitotic cell cycle,kidney development,chromosome segregation,sister chromatid cohesion,mitotic spindle assembly checkpoint,muscle organ development,cell proliferation,regulation of G2/M transition of mitotic cell cycle,protein transport,regulation of striated muscle tissue development,ventricular system development,cell differentiation,response to drug,negative regulation of transcription, DNA-te…
0.771561	0.00780743	0.0124862	Q9NVF7	FBXO28	F-box only protein 28	3	kinetochore,condensed chromosome kinetochore	protein binding
0.771485	0.0493802	0.0537576	Q9UMY1	NOL7	Nucleolar protein 7	3	nucleus,nucleolus,mitochondrion	RNA binding
0.771381	0.0487983	0.0533065	O95394	PGM3	Phosphoacetylglucosamine mutase	3	cellular_component,cytosol	magnesium ion binding,phosphoacetylglucosamine mutase activity,phosphoglucomutase activity	carbohydrate metabolic process,glucosamine metabolic process,UDP-N-acetylglucosamine biosynthetic process,protein N-linked glycosylation,protein O-linked glycosylation,spermatogenesis,glucose 1-phosphate metabolic process,hemopoiesis
0.770282	0.00477132	0.00833939	Q9H9Y2	RPF1	Ribosome production factor 1	6	nucleolus,preribosome, large subunit precursor	RNA binding,protein binding,rRNA primary transcript binding	ribosomal large subunit assembly,maturation of 5.8S rRNA,maturation of LSU-rRNA
0.769859	0.00626275	0.0104156	P62280	RPS11	40S ribosomal protein S11	11	nucleoplasm,nucleolus,cytoplasm,cytosol,ribosome,focal adhesion,membrane,cytosolic small ribosomal subunit,extracellular matrix,extracellular exosome	RNA binding,structural constituent of ribosome,protein binding,rRNA binding	nuclear-transcribed mRNA catabolic process, nonsense-mediated decay,rRNA processing,translation,translational initiation,SRP-dependent cotranslational protein targeting to membrane,viral transcription
0.76914	8.166e-26	2.69632e-24	Q14997	PSME4	Proteasome activator complex subunit 4	32	nucleus,nucleoplasm,cytosol,proteasome core complex,nuclear speck,spermatoproteasome complex	protein binding,peptidase activator activity,lysine-acetylated histone binding,proteasome binding	MAPK cascade,protein polyubiquitination,stimulatory C-type lectin receptor signaling pathway,antigen processing and presentation of exogenous peptide antigen via MHC class I, TAP-dependent,DNA repair,regulation of cellular amino acid metabolic process,cellular response to DNA damage stimulus,multicellular organism development,proteasomal ubiquitin-independent protein catabolic process,positive re…
0.768955	0.0154964	0.0217734	Q9BYG3	NIFK	MKI67 FHA domain-interacting nucleolar phosphoprotein	12	condensed nuclear chromosome,nucleoplasm,nucleolus,cytoplasm	RNA binding,protein binding	protein complex assembly,rRNA transcription,rRNA metabolic process
0.767825	0.00819271	0.0129778	Q92979	EMG1	Ribosomal RNA small subunit methyltransferase NEP1	7	nucleus,nucleoplasm,nucleolus,cytoplasm,small-subunit processome	RNA binding,protein binding,rRNA binding,rRNA (pseudouridine) methyltransferase activity	maturation of SSU-rRNA from tricistronic rRNA transcript (SSU-rRNA, 5.8S rRNA, LSU-rRNA),rRNA processing,ribosomal small subunit biogenesis,rRNA base methylation
0.766365	5.22519e-09	3.5824e-08	Q15545	TAF7	Transcription initiation factor TFIID subunit 7	21	nucleoplasm,transcription factor TFIID complex,Golgi apparatus,transcription factor TFTC complex,MLL1 complex,cyclin/CDK positive transcription elongation factor complex	transcription coactivator activity,protein binding,transcription factor binding,histone acetyltransferase binding,vitamin D receptor binding,transcription regulatory region DNA binding,thyroid hormone receptor binding,protein heterodimerization activity,transcription factor activity, sequence-specific DNA binding,H3K27me3 modified histone binding	negative regulation of transcription from RNA polymerase II promoter,spermine transport,DNA-templated transcription, initiation,transcription from RNA polymerase II promoter,transcription initiation from RNA polymerase II promoter,transcription elongation from RNA polymerase II promoter,negative regulation of protein kinase activity,intracellular estrogen receptor signaling pathway,negative regul…
0.766276	0.0443194	0.0495664	Q15697	ZNF174	Zinc finger protein 174	2	nucleus,nucleoplasm,cytosol,plasma membrane,actin cytoskeleton	RNA polymerase II transcription factor activity, sequence-specific DNA binding,transcriptional repressor activity, RNA polymerase II transcription regulatory region sequence-specific binding,transcription factor activity, sequence-specific DNA binding,protein homodimerization activity,sequence-specific DNA binding,transcription regulatory region DNA binding,metal ion binding	negative regulation of transcription from RNA polymerase II promoter,transcription, DNA-templated,negative regulation of transcription, DNA-templated
0.766118	0.309721	0.208086	Q15004	KIAA0101	PCNA-associated factor	2	nucleus,nucleoplasm,centrosome,perinuclear region of cytoplasm	chromatin binding,protein binding	DNA replication,cellular response to DNA damage stimulus,centrosome cycle,response to UV,translesion synthesis,regulation of cell cycle
0.765734	0.310171	0.208328	P35659	DEK	Protein DEK	4	nucleus,nucleoplasm,contractile fiber	DNA binding,chromatin binding,RNA binding,histone binding	chromatin remodeling,regulation of transcription from RNA polymerase II promoter,transcription from RNA polymerase II promoter,signal transduction,chromatin modification,viral genome replication,positive regulation of gene expression, epigenetic,regulation of double-strand break repair,regulation of double-strand break repair via nonhomologous end joining
0.764959	0.048669	0.0532235	Q8N3X6	LCORL	Ligand-dependent nuclear receptor corepressor-like protein	2	nucleus	DNA binding,protein binding	regulation of transcription from RNA polymerase II promoter,transcription from RNA polymerase II promoter
0.764483	0.0392443	0.0452123	Q53EU6	GPAT3	Glycerol-3-phosphate acyltransferase 3	1	endoplasmic reticulum,endoplasmic reticulum membrane,integral component of membrane	1-acylglycerol-3-phosphate O-acyltransferase activity,glycerol-3-phosphate O-acyltransferase activity,Requires Ontology	phosphatidic acid biosynthetic process,CDP-diacylglycerol biosynthetic process,triglyceride biosynthetic process,regulation of TOR signaling
0.762995	0.0297196	0.0363765	P42338	PIK3CB	Phosphatidylinositol 4,5-bisphosphate 3-kinase catalytic subunit beta isoform	7	nucleus,nucleolus,cytoplasm,cytosol,plasma membrane,phosphatidylinositol 3-kinase complex,midbody	protein binding,ATP binding,kinase activity,1-phosphatidylinositol-3-kinase activity,phosphatidylinositol 3-kinase activity,1-phosphatidylinositol-4-phosphate 3-kinase activity,insulin receptor substrate binding,phosphatidylinositol-4,5-bisphosphate 3-kinase activity	activation of MAPK activity,endothelial cell proliferation,regulation of cell-matrix adhesion,adaptive immune response,phosphatidylinositol biosynthetic process,cellular calcium ion homeostasis,autophagy,chemotaxis,inflammatory response,homophilic cell adhesion via plasma membrane adhesion molecules,signal transduction,transmembrane receptor protein tyrosine kinase signaling pathway,G-protein cou…
0.762539	0.338135	0.220859	Q9H334	FOXP1	Forkhead box protein P1	5	nucleus,nucleoplasm	RNA polymerase II transcription factor activity, sequence-specific DNA binding,protein binding,identical protein binding,sequence-specific DNA binding,protein self-association,metal ion binding,androgen receptor binding	negative regulation of B cell apoptotic process,transcription, DNA-templated,regulation of transcription from RNA polymerase II promoter,positive regulation of endothelial cell migration,osteoclast differentiation,response to lipopolysaccharide,regulation of tumor necrosis factor production,somatic stem cell population maintenance,chemokine (C-C motif) ligand 2 secretion,osteoclast development,ma…
0.762502	0.0109111	0.0163921	Q8N108	MIER1	Mesoderm induction early response protein 1	9	nucleus,nucleoplasm,cytoplasm,transcriptional repressor complex,protein complex	DNA binding,histone deacetylase activity,signal transducer activity,protein binding,histone deacetylase binding	transcription, DNA-templated,signal transduction,histone deacetylation,positive regulation of chromatin silencing,positive regulation of I-kappaB kinase/NF-kappaB signaling
0.762385	0.00464953	0.00815502	Q96RL7	VPS13A	Vacuolar protein sorting-associated protein 13A	20	intracellular,cytosol,dense core granule	protein binding	Golgi to endosome transport,autophagy,nervous system development,locomotory behavior,protein localization,protein transport,social behavior
0.76232	0.154219	0.126453	Q6DKI1	RPL7L1	60S ribosomal protein L7-like 1	9	nucleolus,cytosolic large ribosomal subunit	RNA binding,structural constituent of ribosome	maturation of LSU-rRNA from tricistronic rRNA transcript (SSU-rRNA, 5.8S rRNA, LSU-rRNA),blastocyst formation,cytoplasmic translation
0.76145	0.0846633	0.0807635	Q8N488	RYBP	RING1 and YY1-binding protein	4	nucleus,nucleoplasm,cytoplasm,PcG protein complex	DNA binding,transcription corepressor activity,protein binding,metal ion binding	negative regulation of transcription from RNA polymerase II promoter,transcription, DNA-templated,apoptotic process,multicellular organism development,negative regulation of proteasomal ubiquitin-dependent protein catabolic process,histone H2A monoubiquitination,positive regulation of apoptotic process,positive regulation of transcription, DNA-templated,negative regulation of G0 to G1 transition
0.759475	0.00556668	0.00945336	Q8NEY8	PPHLN1	Periphilin-1	13	nucleoplasm,chromosome,Golgi apparatus,cytosol	RNA binding,protein binding	transcription, DNA-templated,keratinization,negative regulation of transcription, DNA-templated
0.759448	2.302e-07	1.21615e-06	Q14674	ESPL1	Separin	25	nucleus,cytoplasm,centrosome,cytosol,mitotic spindle	catalytic activity,cysteine-type endopeptidase activity,protein binding,cysteine-type peptidase activity	mitotic sister chromatid segregation,meiotic spindle organization,cytokinesis,proteolysis,apoptotic process,establishment of mitotic spindle localization,homologous chromosome segregation,positive regulation of mitotic metaphase/anaphase transition,negative regulation of sister chromatid cohesion,meiotic chromosome separation
0.759309	0.0358484	0.0420935	P31946	YWHAB	14-3-3 protein beta/alpha	13	nucleus,cytoplasm,mitochondrion,cytosol,focal adhesion,membrane,transcriptional repressor complex,cytoplasmic vesicle membrane,melanosome,protein complex,perinuclear region of cytoplasm,extracellular exosome	transcription corepressor activity,protein binding,protein C-terminus binding,enzyme binding,protein domain specific binding,protein complex binding,identical protein binding,histone deacetylase binding,cadherin binding,phosphoserine binding,phosphoprotein binding	MAPK cascade,protein targeting,viral process,negative regulation of protein dephosphorylation,hippo signaling,positive regulation of catalytic activity,regulation of mRNA stability,negative regulation of G-protein coupled receptor protein signaling pathway,negative regulation of transcription, DNA-templated,cytoplasmic sequestering of protein,protein heterooligomerization,membrane organization,po…
0.758864	0.137607	0.116161	P35453	HOXD13	Homeobox protein Hox-D13	4	nucleus	RNA polymerase II core promoter proximal region sequence-specific DNA binding,transcriptional activator activity, RNA polymerase II core promoter proximal region sequence-specific binding,enhancer sequence-specific DNA binding,transcriptional activator activity, RNA polymerase II transcription regulatory region sequence-specific binding,DNA binding,chromatin binding,transcription factor activity,…	skeletal system development,regulation of transcription, DNA-templated,transcription from RNA polymerase II promoter,multicellular organism development,anterior/posterior pattern specification,male genitalia development,response to testosterone,regulation of cell proliferation,embryonic digit morphogenesis,positive regulation of transcription from RNA polymerase II promoter,embryonic hindgut morp…
0.758411	0.00100603	0.00223138	P49419	ALDH7A1	Alpha-aminoadipic semialdehyde dehydrogenase	7	nucleus,mitochondrion,mitochondrial matrix,cytosol,extracellular exosome	aldehyde dehydrogenase (NAD) activity,L-aminoadipate-semialdehyde dehydrogenase activity,protein binding,betaine-aldehyde dehydrogenase activity	cellular aldehyde metabolic process,lysine catabolic process,sensory perception of sound,glycine betaine biosynthetic process from choline,choline catabolic process,oxidation-reduction process
0.758389	0.0467617	0.0516459	Q96EL3	MRPL53	39S ribosomal protein L53, mitochondrial	1	mitochondrial inner membrane,mitochondrial large ribosomal subunit	protein binding	mitochondrial translational elongation,mitochondrial translational termination
0.757675	1.85516e-20	4.32871e-19	O95235	KIF20A	Kinesin-like protein KIF20A	20	nucleoplasm,Golgi apparatus,spindle,kinesin complex,microtubule,midbody,cleavage furrow,intercellular bridge	microtubule motor activity,transporter activity,protein binding,ATP binding,microtubule binding,ATPase activity,protein kinase binding	mitotic cytokinesis,cytokinesis,cell separation after cytokinesis,microtubule bundle formation,microtubule-based movement,protein transport,vesicle-mediated transport
0.75751	0.000869843	0.00197307	Q86WZ6	ZNF227	Zinc finger protein 227	6	nucleus	DNA binding,transcription factor activity, sequence-specific DNA binding,protein binding,metal ion binding	transcription, DNA-templated,regulation of transcription, DNA-templated
0.756839	0.000207278	0.000562599	P62081	RPS7	40S ribosomal protein S7	13	nucleus,nucleoplasm,nucleolus,cytosol,ribosome,focal adhesion,membrane,cytosolic small ribosomal subunit,intracellular ribonucleoprotein complex,90S preribosome,extracellular matrix,small-subunit processome,protein complex,extracellular exosome,centrosome	RNA binding,mRNA 3'-UTR binding,structural constituent of ribosome,protein binding,protein kinase binding,mRNA 5'-UTR binding,ubiquitin ligase inhibitor activity	nuclear-transcribed mRNA catabolic process, nonsense-mediated decay,neural tube closure,cytoplasmic translation,rRNA processing,translation,translational initiation,SRP-dependent cotranslational protein targeting to membrane,positive regulation of gene expression,viral transcription,cell differentiation,ribosomal small subunit biogenesis,protein stabilization,positive regulation of intrinsic apop…
0.756209	0.174747	0.138515	P30291	WEE1	Wee1-like protein kinase	1	nucleus,nucleoplasm,nucleolus,cytoplasm	magnesium ion binding,protein tyrosine kinase activity,non-membrane spanning protein tyrosine kinase activity,protein binding,ATP binding,kinase activity	G1/S transition of mitotic cell cycle,G2/M transition of mitotic cell cycle,microtubule cytoskeleton organization,peptidyl-tyrosine phosphorylation,establishment of cell polarity,neuron projection morphogenesis,cell division,regulation of cell cycle
0.755103	0.0507941	0.0549126	Q8IYN0	ZNF100	Zinc finger protein 100	3	nucleus	DNA binding,metal ion binding	transcription, DNA-templated,regulation of transcription, DNA-templated
0.754612	0.00125207	0.00271178	Q14103	HNRNPD	Heterogeneous nuclear ribonucleoprotein D0	11	nucleus,nucleoplasm,cytosol,intracellular ribonucleoprotein complex,extracellular exosome	AT DNA binding,chromatin binding,RNA binding,protein binding,transcription factor binding,mRNA 3'-UTR AU-rich region binding,telomeric DNA binding,histone deacetylase binding	mRNA splicing, via spliceosome,liver development,transcription, DNA-templated,regulation of transcription, DNA-templated,RNA processing,RNA catabolic process,RNA metabolic process,cerebellum development,regulation of telomere maintenance,regulation of circadian rhythm,regulation of mRNA stability,positive regulation of translation,positive regulation of transcription, DNA-templated,mRNA stabiliza…
0.753334	0.0108269	0.0162845	Q96IJ6	GMPPA	Mannose-1-phosphate guanyltransferase alpha	3	cytoplasm,extracellular exosome	protein binding,nucleotidyltransferase activity	biosynthetic process
0.75315	7.26558e-06	2.87015e-05	Q9H467	CUEDC2	CUE domain-containing protein 2	10	nucleoplasm,cytosol,nuclear membrane	protein binding	negative regulation of macrophage cytokine production,negative regulation of cytokine production involved in inflammatory response
0.752082	0.000660519	0.00156151	Q9ULI2	RIMKLB	Beta-citrylglutamate synthase B	3	cytoplasm,cytosol	ATP binding,metal ion binding,N-acetyl-L-aspartate-L-glutamate ligase activity,citrate-L-glutamate ligase activity	cellular protein modification process,cellular amino acid biosynthetic process
0.751742	0.00560064	0.00949951	Q8WVZ9	KBTBD7	Kelch repeat and BTB domain-containing protein 7	17	cellular_component,cytosol,Cul3-RING ubiquitin ligase complex	molecular_function,protein binding,ubiquitin-protein transferase activity	MAPK cascade,biological_process,protein ubiquitination,post-translational protein modification
0.751596	3.97287e-15	5.79377e-14	Q9UQ84	EXO1	Exonuclease 1	11	nucleus,nucleoplasm,plasma membrane,nuclear body	DNA binding,chromatin binding,RNA-DNA hybrid ribonuclease activity,exonuclease activity,protein binding,5'-3' exonuclease activity,5'-3' exodeoxyribonuclease activity,single-stranded DNA 5'-3' exodeoxyribonuclease activity,metal ion binding,flap endonuclease activity,double-stranded DNA 5'-3' exodeoxyribonuclease activity	DNA synthesis involved in DNA repair,strand displacement,humoral immune response mediated by circulating immunoglobulin,DNA replication,DNA repair,mismatch repair,DNA recombination,somatic hypermutation of immunoglobulin genes,isotype switching,meiotic cell cycle,RNA phosphodiester bond hydrolysis, endonucleolytic,t-circle formation,regulation of signal transduction by p53 class mediator
0.750725	0.0528281	0.05665	P18754	RCC1	Regulator of chromosome condensation	12	nuclear chromatin,condensed nuclear chromosome,nucleus,nucleoplasm,cytoplasm,nuclear membrane,protein complex	chromatin binding,Ran guanyl-nucleotide exchange factor activity,protein binding,Ran GTPase binding,nucleosome binding,nucleosomal DNA binding,histone binding,sulfate binding,protein heterodimerization activity	G1/S transition of mitotic cell cycle,mitotic spindle organization,chromosome segregation,regulation of mitotic nuclear division,viral process,spindle assembly,protein heterotetramerization,cell division,regulation of molecular function
0.749708	0.0475475	0.0522608	Q6AHZ1	ZNF518A	Zinc finger protein 518A	10	nucleus	RNA polymerase II transcription factor activity, sequence-specific DNA binding,DNA binding,metal ion binding	transcription, DNA-templated,regulation of transcription from RNA polymerase II promoter
0.74902	0.0366587	0.0428256	Q58WW2	DCAF6	DDB1- and CUL4-associated factor 6	1	nucleus,nucleoplasm,cytosol,focal adhesion,Cul4-RING E3 ubiquitin ligase complex	protein binding,ligand-dependent nuclear receptor transcription coactivator activity	protein ubiquitination,post-translational protein modification,positive regulation of transcription from RNA polymerase II promoter
0.748558	2.44253e-05	8.40049e-05	Q15022	SUZ12	Polycomb protein SUZ12	15	sex chromatin,nucleus,nucleoplasm,nucleolus,RSC complex,nuclear body,protein-DNA complex,ESC/E(Z) complex	RNA polymerase II core promoter proximal region sequence-specific DNA binding,RNA binding,protein binding,chromatin DNA binding,methylated histone binding,histone methyltransferase activity,metal ion binding,promoter-specific chromatin binding,histone methyltransferase activity (H3-K27 specific)	negative regulation of transcription from RNA polymerase II promoter,transcription, DNA-templated,regulation of transcription, DNA-templated,positive regulation of cell proliferation,histone ubiquitination,negative regulation of cell differentiation,negative regulation of gene expression, epigenetic,negative regulation of G0 to G1 transition,histone H3-K27 methylation
0.748238	0.167499	0.134245	Q9P2P6	STARD9	StAR-related lipid transfer protein 9	1	nucleus,cytoplasm,centriole	microtubule motor activity,ATP binding,microtubule binding,cholesterol binding	microtubule-based movement,spindle assembly
0.74818	0.00872562	0.0136329	Q13105	ZBTB17	Zinc finger and BTB domain-containing protein 17	1	nucleoplasm,protein-DNA complex,protein complex	RNA polymerase II core promoter proximal region sequence-specific DNA binding,core promoter binding,transcriptional activator activity, RNA polymerase II core promoter proximal region sequence-specific binding,transcription coactivator binding,transcriptional activator activity, RNA polymerase II transcription regulatory region sequence-specific binding,transcription factor activity, sequence-spe…	gastrulation with mouth forming second,transcription from RNA polymerase II promoter,ectoderm development,negative regulation of cell proliferation,IRE1-mediated unfolded protein response,negative regulation of cell cycle,positive regulation of transcription from RNA polymerase II promoter,positive regulation of cell cycle arrest,regulation of mitophagy,positive regulation of protein targeting to…
0.747929	0.204161	0.154717	Q9UIS9	MBD1	Methyl-CpG-binding domain protein 1	5	nucleus,chromosome,nuclear matrix,nuclear speck	DNA binding,protein binding,zinc ion binding,methyl-CpG binding,double-stranded methylated DNA binding	transcription from RNA polymerase II promoter,negative regulation of transcription, DNA-templated
0.747282	0.00182101	0.00373706	Q9HBG6	IFT122	Intraflagellar transport protein 122 homolog	5	nucleoplasm,cytosol,cilium,membrane,intraciliary transport particle A,photoreceptor connecting cilium,ciliary basal body,ciliary tip,ciliary base	protein binding	neural tube closure,signal transduction downstream of smoothened,embryonic body morphogenesis,negative regulation of smoothened signaling pathway involved in ventral spinal cord patterning,embryonic heart tube development,embryonic forelimb morphogenesis,intraciliary anterograde transport,intraciliary retrograde transport,intraciliary transport involved in cilium morphogenesis,embryonic digit mor…
0.747129	0.0444485	0.049671	Q8WW01	TSEN15	tRNA-splicing endonuclease subunit Sen15	1	nucleoplasm,nucleolus	tRNA-intron endonuclease activity	tRNA splicing, via endonucleolytic cleavage and ligation,mRNA processing,RNA phosphodiester bond hydrolysis, endonucleolytic
0.745991	0.367724	0.234689	Q9UBU7	DBF4	Protein DBF4 homolog A	1	nucleus,nucleoplasm,nuclear body	nucleic acid binding,protein binding,enzyme activator activity,zinc ion binding	G1/S transition of mitotic cell cycle,DNA replication,positive regulation of catalytic activity
0.745972	0.0303365	0.0369764	Q9H0H0	INTS2	Integrator complex subunit 2	2	intracellular,nucleus,nucleoplasm,cytoplasm,membrane,integral component of membrane,nuclear membrane,integrator complex	protein binding	snRNA processing,snRNA 3'-end processing,snRNA transcription from RNA polymerase II promoter
0.744227	0.110858	0.0987791	Q6P444	MTFR2	Mitochondrial fission regulator 2	2	mitochondrion	protein binding	mitochondrial fission,mitochondrion organization,aerobic respiration
0.744197	0.849007	0.40659	Q13434;Q9UHC7	MKRN4P;MKRN1	Putative E3 ubiquitin-protein ligase makorin-4;E3 ubiquitin-protein ligase makorin-1	1	;cellular_component,cytosol	transferase activity,metal ion binding;RNA binding,ubiquitin-protein transferase activity,protein binding,metal ion binding,ubiquitin protein ligase activity	protein ubiquitination;protein polyubiquitination,protein kinase B signaling
0.744169	0.00170012	0.00351679	O75607	NPM3	Nucleoplasmin-3	2	nucleolus,cytosol,actin cytoskeleton	RNA binding,protein binding	rRNA processing,rRNA transcription
0.741359	0.0180449	0.0245461	Q9UHC1	MLH3	DNA mismatch repair protein Mlh3	8	synaptonemal complex,male germ cell nucleus,nucleus,chiasma,mismatch repair complex	chromatin binding,satellite DNA binding,single-stranded DNA binding,protein binding,ATP binding,ATPase activity,centromeric DNA binding,mismatched DNA binding	mismatch repair,synaptonemal complex assembly,reciprocal meiotic recombination,male meiosis,female meiosis I,protein localization
0.740908	0.544402	0.305134	Q3B820	FAM161A	Protein FAM161A	1	astral microtubule,photoreceptor inner segment,centrosome,spindle microtubule,photoreceptor connecting cilium,ciliary basal body,mitotic spindle,mitotic spindle pole	protein binding,microtubule binding,identical protein binding	visual perception,response to stimulus,cilium morphogenesis,positive regulation of protein acetylation
0.739824	1.48789e-07	8.12421e-07	Q14207	NPAT	Protein NPAT	14	nucleus,nucleoplasm,cytoplasm,Cajal body,Gemini of coiled bodies	transcription coactivator activity,transcription corepressor activity,protein binding,protein C-terminus binding,protein N-terminus binding	regulation of transcription involved in G1/S transition of mitotic cell cycle,transcription, DNA-templated,regulation of gene expression,positive regulation of transcription, DNA-templated,negative regulation of nucleic acid-templated transcription
0.739675	0.000145697	0.000412238	Q9NZC9	SMARCAL1	SWI/SNF-related matrix-associated actin-dependent regulator of chromatin subfamily A-like protein 1	7	nucleus,nucleoplasm,site of double-strand break,DNA replication factor A complex	helicase activity,protein binding,ATP binding,DNA-dependent ATPase activity,annealing helicase activity	DNA strand renaturation,DNA metabolic process,DNA repair,regulation of transcription from RNA polymerase II promoter,cellular response to DNA damage stimulus,replication fork processing,t-circle formation
0.739399	0.558694	0.310588	A6NIH7	UNC119B	Protein unc-119 homolog B	1	intracellular,cytosol,cilium,ciliary transition zone	protein binding,lipid binding	neuron differentiation,lipoprotein transport,cilium morphogenesis
0.738541	0.284124	0.196044	Q12816	TRO	Trophinin	2	plasma membrane,integral component of plasma membrane	protein binding	homophilic cell adhesion via plasma membrane adhesion molecules,embryo implantation
0.738072	0.182039	0.142409	Q8NBZ0	INO80E	INO80 complex subunit E	1	nucleus,nucleoplasm,nucleolus,Ino80 complex	protein binding	DNA repair,DNA recombination,chromatin remodeling,transcription, DNA-templated,regulation of transcription, DNA-templated,protein deubiquitination
0.737745	0.00849941	0.0133489	Q9UKT4	FBXO5	F-box only protein 5	5	nucleus,nucleoplasm,cytoplasm,spindle,cytosol	protein binding,protein kinase binding,metal ion binding,ubiquitin ligase inhibitor activity	regulation of transcription involved in G1/S transition of mitotic cell cycle,oocyte maturation,spindle assembly involved in female meiosis I,regulation of mitotic nuclear division,regulation of mitotic cell cycle,vesicle organization,negative regulation of meiotic nuclear division,microtubule polymerization,cell division,negative regulation of ubiquitin-protein ligase activity involved in mitoti…
0.73744	0.134718	0.114243	Q5T0B9	ZNF362	Zinc finger protein 362	2	nucleus	DNA binding,metal ion binding	transcription, DNA-templated,regulation of transcription, DNA-templated
0.737138	0.149334	0.123548	Q7Z4R8	C6orf120	UPF0669 protein C6orf120	1	extracellular region,azurophil granule lumen,extracellular exosome		apoptotic process,neutrophil degranulation
0.736591	0.939969	0.433063	Q8NFW8	CMAS	N-acylneuraminate cytidylyltransferase	10	nucleus,nucleoplasm,membrane	N-acylneuraminate cytidylyltransferase activity	N-acetylneuraminate metabolic process
0.735856	0.259219	0.184018	Q9UGY1	NOL12	Nucleolar protein 12	5	nucleolus	RNA binding,protein binding,rRNA binding
0.734754	0.11915	0.104308	A8MT69	STRA13	Centromere protein X	4	condensed chromosome kinetochore,nucleoplasm,Fanconi anaemia nuclear complex,FANCM-MHF complex	DNA binding,protein binding,double-stranded DNA binding	resolution of meiotic recombination intermediates,replication fork processing,positive regulation of protein ubiquitination,CENP-A containing nucleosome assembly,interstrand cross-link repair,cell division,kinetochore assembly
0.733889	1.59771e-45	1.5752e-43	Q6W2J9	BCOR	BCL-6 corepressor	82	nucleus,PcG protein complex	RNA polymerase II regulatory region sequence-specific DNA binding,transcription corepressor activity,protein binding,transcription factor binding,heat shock protein binding,histone deacetylase binding,transcription regulatory region DNA binding,ubiquitin-protein transferase activity	negative regulation of transcription from RNA polymerase II promoter,negative regulation of histone H3-K36 methylation,transcription, DNA-templated,heart development,negative regulation of bone mineralization,histone H2A monoubiquitination,odontogenesis,negative regulation of transcription, DNA-templated,negative regulation of histone H3-K4 methylation,palate development,specification of axis pol…
0.733756	2.80324e-06	1.2188e-05	Q9H269	VPS16	Vacuolar protein sorting-associated protein 16 homolog	9	lysosome,lysosomal membrane,early endosome,late endosome,autophagosome,clathrin-coated vesicle,axon,HOPS complex,late endosome membrane,neuronal cell body,recycling endosome	actin binding,protein binding,actin filament binding	intracellular protein transport,vacuole organization,endosome to lysosome transport,regulation of vacuole fusion, non-autophagic,regulation of SNARE complex assembly,autophagosome maturation
0.732109	0.0873771	0.0824818	Q8IXI2	RHOT1	Mitochondrial Rho GTPase 1	4	mitochondrion,mitochondrial outer membrane,cytosol,plasma membrane,membrane,integral component of mitochondrial outer membrane	molecular_function,GTPase activity,calcium ion binding,protein binding,GTP binding	protein deubiquitination,cellular homeostasis,establishment of mitochondrion localization by microtubule attachment,regulation of neurotransmitter secretion,mitochondrion transport along microtubule,regulation of small GTPase mediated signal transduction,mitochondrial outer membrane permeabilization,regulation of organelle transport along microtubule
0.731921	0.0903853	0.0846758	P31942	HNRNPH3	Heterogeneous nuclear ribonucleoprotein H3	8	nucleus,nucleoplasm,spliceosomal complex	RNA binding,protein binding	mRNA splicing, via spliceosome,RNA processing,RNA splicing,epithelial cell differentiation
0.730347	0.00232125	0.0045841	Q9UKM9	RALY	RNA-binding protein Raly	12	nucleus,catalytic step 2 spliceosome	transcription cofactor activity,RNA binding,protein binding	mRNA splicing, via spliceosome,transcription, DNA-templated,regulation of transcription, DNA-templated,regulation of nucleic acid-templated transcription,regulation of cholesterol homeostasis
0.729991	0.000427311	0.00106599	Q7L5Y9	MAEA	Macrophage erythroblast attacher	4	nucleus,nucleoplasm,spindle,actomyosin contractile ring,cytoskeleton,integral component of plasma membrane,nuclear matrix,GID complex	actin binding,ubiquitin-protein transferase activity	cytoskeleton organization,cell cycle,cell adhesion,regulation of mitotic cell cycle,negative regulation of myeloid cell apoptotic process,protein ubiquitination involved in ubiquitin-dependent protein catabolic process,proteasome-mediated ubiquitin-dependent protein catabolic process,erythrocyte maturation,negative regulation of gluconeogenesis,enucleate erythrocyte development,cell division
0.729951	0.000244897	0.000652809	Q99755	PIP5K1A	Phosphatidylinositol 4-phosphate 5-kinase type-1 alpha	1	nucleus,nucleoplasm,cytosol,plasma membrane,focal adhesion,nuclear speck,lamellipodium,ruffle membrane,mRNA cleavage and polyadenylation specificity factor complex	1-phosphatidylinositol-3-phosphate 5-kinase activity,protein binding,ATP binding,1-phosphatidylinositol-4-phosphate 5-kinase activity,kinase binding,1-phosphatidylinositol-5-kinase activity,1-phosphatidylinositol-3-phosphate 4-kinase activity,phosphatidylinositol-3,4-bisphosphate 5-kinase activity	glycerophospholipid metabolic process,phosphatidylinositol biosynthetic process,phagocytosis,signal transduction,phospholipid biosynthetic process,fibroblast migration,regulation of phosphatidylinositol 3-kinase signaling,cell migration,keratinocyte differentiation,actin cytoskeleton reorganization,phosphatidylinositol phosphorylation,focal adhesion assembly,cell chemotaxis,protein localization t…
0.729717	4.95573e-05	0.000157611	Q8WWQ0	PHIP	PH-interacting protein	35	nucleus,extracellular exosome	insulin receptor binding,protein binding,lysine-acetylated histone binding	regulation of protein phosphorylation,cytoskeleton organization,positive regulation of cell proliferation,insulin receptor signaling pathway,regulation of cell shape,regulation of cell morphogenesis,negative regulation of apoptotic process,positive regulation of insulin-like growth factor receptor signaling pathway,positive regulation of mitotic nuclear division,positive regulation of transcripti…
0.729714	0.00725806	0.0117632	P23921	RRM1	Ribonucleoside-diphosphate reductase large subunit	7	nuclear envelope,cytosol,ribonucleoside-diphosphate reductase complex,cell projection,neuronal cell body,extracellular exosome	ribonucleoside-diphosphate reductase activity, thioredoxin disulfide as acceptor,protein binding,ATP binding,identical protein binding,disordered domain specific binding	mitotic cell cycle,pyrimidine nucleobase metabolic process,DNA replication,male gonad development,deoxyribonucleotide biosynthetic process,response to ionizing radiation,nucleobase-containing small molecule interconversion,cell proliferation in forebrain,protein heterotetramerization,oxidation-reduction process,retina development in camera-type eye
0.729517	0.00032738	0.000843143	Q5BKZ1	ZNF326	DBIRD complex subunit ZNF326	20	nucleoplasm,nuclear matrix,intracellular membrane-bounded organelle,DBIRD complex,spliceosomal complex	RNA polymerase II core binding,DNA binding,RNA binding,protein binding,metal ion binding	transcription, DNA-templated,mRNA processing,RNA splicing,regulation of DNA-templated transcription, elongation,regulation of RNA splicing
0.729504	0.000707225	0.0016551	Q9Y679	AUP1	Ancient ubiquitous protein 1	2	Hrd1p ubiquitin ligase ERAD-L complex,membrane,integral component of endoplasmic reticulum membrane,extracellular exosome	protein binding,ubiquitin binding,ubiquitin-protein transferase activator activity	ER-associated ubiquitin-dependent protein catabolic process,retrograde protein transport, ER to cytosol,regulation of catalytic activity
0.729217	0.0867821	0.0820801	P51571	SSR4	Translocon-associated protein subunit delta	5	Sec61 translocon complex,integral component of membrane,extracellular exosome
0.728907	3.24901e-06	1.39871e-05	Q9Y3A4	RRP7A	Ribosomal RNA-processing protein 7 homolog A	10	nucleoplasm,cytoplasm,CURI complex,UTP-C complex	RNA binding,protein binding	ribosomal small subunit assembly,blastocyst formation,rRNA processing
0.728775	0.371623	0.236444	O60346	PHLPP1	PH domain leucine-rich repeat-containing protein phosphatase 1	2	cytoplasm,cytosol,plasma membrane,nuclear membrane	protein serine/threonine phosphatase activity,protein binding,metal ion binding	regulation of T cell anergy,protein dephosphorylation,apoptotic process,entrainment of circadian clock,regulation of apoptotic process,regulation of MAPK cascade,regulation of JNK cascade,negative regulation of protein kinase B signaling,regulation of protein kinase C signaling,regulation of p38MAPK cascade
0.728769	0.0026377	0.00510476	Q6IQ49	SDE2	Protein SDE2 homolog	11	nucleus	DNA binding	DNA replication,cell cycle,cell division
0.72704	0.0854966	0.0812815	Q9NZJ0	DTL	Denticleless protein homolog	6	nucleus,nucleoplasm,chromosome,nucleolus,centrosome,cytosol,Cul4A-RING E3 ubiquitin ligase complex,Cul4B-RING E3 ubiquitin ligase complex,nuclear membrane,Cul4-RING E3 ubiquitin ligase complex	protein binding,ubiquitin-protein transferase activity	protein polyubiquitination,DNA replication,ubiquitin-dependent protein catabolic process,protein monoubiquitination,cellular response to DNA damage stimulus,response to UV,positive regulation of G2/M transition of mitotic cell cycle,translesion synthesis,DNA damage response, detection of DNA damage,post-translational protein modification,positive regulation of protein catabolic process,regulation…
0.726286	0.0477996	0.052453	Q14166	TTLL12	Tubulin--tyrosine ligase-like protein 12	1		catalytic activity,ATP binding	cellular protein modification process
0.725753	6.64649e-06	2.648e-05	Q53GS7	GLE1	Nucleoporin GLE1	8	extracellular space,nuclear pore,nucleolus,cytoplasm,cytosol,membrane,nuclear membrane,nuclear pore cytoplasmic filaments	inositol hexakisphosphate binding,protein binding,phospholipid binding,translation initiation factor binding,identical protein binding	mRNA export from nucleus,regulation of translational initiation,regulation of translational termination,poly(A)+ mRNA export from nucleus
0.724521	0.0694724	0.0694823	Q8IYX8	CEP57L1	Centrosomal protein CEP57L1	4	cellular_component,cytoplasm,centrosome,microtubule	molecular_function,protein binding,microtubule binding,identical protein binding,gamma-tubulin binding	mitotic sister chromatid segregation,biological_process
0.724361	0.168012	0.134594	Q86WB0	ZC3HC1	Nuclear-interacting partner of ALK	5	nucleus,nuclear membrane	protein binding,zinc ion binding,protein kinase binding	cell cycle,protein ubiquitination,cell division,negative regulation of extrinsic apoptotic signaling pathway in absence of ligand
0.724029	0.0064699	0.010694	Q8N6R0	METTL13	Methyltransferase-like protein 13	4		protein binding,methyltransferase activity	methylation
0.723919	9.32607e-05	0.000277208	Q8N8D1	PDCD7	Programmed cell death protein 7	9	nucleoplasm,U12-type spliceosomal complex		mRNA splicing, via spliceosome,apoptotic process,RNA splicing,response to glucocorticoid
0.723194	2.52897e-05	8.65239e-05	P06400	RB1	Retinoblastoma-associated protein	13	chromatin,nucleus,nucleoplasm,spindle,SWI/SNF complex,PML body,Rb-E2F complex,cyclin/CDK positive transcription elongation factor complex	core promoter binding,RNA polymerase II activating transcription factor binding,DNA binding,transcription factor activity, sequence-specific DNA binding,transcription coactivator activity,protein binding,transcription factor binding,kinase binding,ubiquitin protein ligase binding,identical protein binding,androgen receptor binding,phosphoprotein binding,importin-alpha family protein binding,disor…	cell cycle checkpoint,G1/S transition of mitotic cell cycle,regulation of transcription involved in G1/S transition of mitotic cell cycle,regulation of cell growth,tissue homeostasis,chromatin remodeling,transcription, DNA-templated,regulation of transcription, DNA-templated,negative regulation of protein kinase activity,cell cycle arrest,negative regulation of transcription from RNA polymerase I…
0.720827	0.0392693	0.0452337	O43307;Q96N96;Q9NR80	ARHGEF9;SPATA13;ARHGEF4	Rho guanine nucleotide exchange factor 9;Spermatogenesis-associated protein 13;Rho guanine nucleotide exchange factor 4	1	cytosol;nucleoplasm,cytoplasm,cytosol,lamellipodium,filopodium,ruffle membrane;cytosol,ruffle membrane	guanyl-nucleotide exchange factor activity,Rho guanyl-nucleotide exchange factor activity;guanyl-nucleotide exchange factor activity,protein binding,Rac guanyl-nucleotide exchange factor activity;guanyl-nucleotide exchange factor activity,Rho guanyl-nucleotide exchange factor activity,protein binding,protein domain specific binding,Rac guanyl-nucleotide exchange factor activity	G-protein coupled receptor signaling pathway,regulation of Rho protein signal transduction,positive regulation of apoptotic process,regulation of small GTPase mediated signal transduction,regulation of molecular function;cell migration,lamellipodium assembly,regulation of cell migration,regulation of Rho protein signal transduction,filopodium assembly,regulation of molecular function;G-protein co…
0.716215	1.00512e-06	4.76358e-06	Q9H8H0	NOL11	Nucleolar protein 11	20	nucleoplasm,nucleolus,t-UTP complex	RNA binding,protein binding	transcription, DNA-templated,rRNA processing,maturation of SSU-rRNA,positive regulation of transcription of nuclear large rRNA transcript from RNA polymerase I promoter
0.714868	3.65393e-05	0.000120478	Q99729	HNRNPAB	Heterogeneous nuclear ribonucleoprotein A/B	11	nucleus,nucleoplasm,cytoplasm,intracellular ribonucleoprotein complex,RNA polymerase II transcription factor complex	RNA binding,mRNA binding,protein binding,transcription factor activity, sequence-specific DNA binding,sequence-specific DNA binding	epithelial to mesenchymal transition,positive regulation of transcription, DNA-templated
0.713445	0.1068	0.0959937	P37275	ZEB1	Zinc finger E-box-binding homeobox 1	11	nucleus,nucleoplasm,transcription factor complex,cytosol	transcriptional repressor activity, RNA polymerase II transcription regulatory region sequence-specific binding,chromatin binding,transcription factor activity, sequence-specific DNA binding,transcription coactivator activity,transcription corepressor activity,protein binding,transcription factor binding,zinc ion binding,E-box binding	negative regulation of transcription from RNA polymerase II promoter,transcription, DNA-templated,regulation of transcription from RNA polymerase II promoter,immune response,pattern specification process,central nervous system development,cell proliferation,negative regulation of cell proliferation,regulation of mesenchymal cell proliferation,regulation of transforming growth factor beta receptor…
0.712192	0.0116213	0.0172167	P11172	UMPS	Uridine 5'-monophosphate synthase	1	nucleus,cytoplasm,cytosol	orotate phosphoribosyltransferase activity,orotidine-5'-phosphate decarboxylase activity	'de novo' pyrimidine nucleobase biosynthetic process,UMP biosynthetic process,female pregnancy,lactation,cellular response to drug,'de novo' UMP biosynthetic process,pyrimidine nucleoside biosynthetic process
0.708269	0.0348283	0.0411197	P13798	APEH	Acylamino-acid-releasing enzyme	3	extracellular region,cytosol,nuclear membrane,extracellular exosome,ficolin-1-rich granule lumen	RNA binding,serine-type endopeptidase activity,protein binding,omega peptidase activity,identical protein binding	translational termination,proteolysis,neutrophil degranulation,beta-amyloid metabolic process
0.707657	1.10731e-05	4.15389e-05	Q13395	TARBP1	Probable methyltransferase TARBP1	5	nucleus	RNA binding,tRNA (guanine) methyltransferase activity,rRNA (guanosine-2'-O-)-methyltransferase activity	enzyme-directed rRNA 2'-O-methylation,regulation of transcription from RNA polymerase II promoter,tRNA methylation
0.707255	9.67385e-05	0.000286451	Q9UN30	SCML1	Sex comb on midleg-like protein 1	6	nucleus	DNA binding,transcription factor activity, sequence-specific DNA binding	transcription, DNA-templated,regulation of transcription, DNA-templated,anatomical structure morphogenesis
0.707165	0.245154	0.176915	Q9UHP3	USP25	Ubiquitin carboxyl-terminal hydrolase 25	1	nucleus,endoplasmic reticulum,cytosol	thiol-dependent ubiquitin-specific protease activity,protein binding,peptidase activity,ubiquitin protein ligase binding,thiol-dependent ubiquitinyl hydrolase activity,ubiquitin binding,ATPase binding,ubiquitin-specific protease activity involved in negative regulation of ERAD pathway	cellular protein modification process,proteolysis,ubiquitin-dependent protein catabolic process,protein deubiquitination,protein K63-linked deubiquitination,protein K48-linked deubiquitination,negative regulation of ERAD pathway
0.707154	0.00129801	0.002788	Q9H7Z6	KAT8	Histone acetyltransferase KAT8	9	histone acetyltransferase complex,kinetochore,nucleus,nucleoplasm,MLL1 complex,MSL complex	histone acetyltransferase activity,protein binding,transcription factor binding,acetyltransferase activity,enzyme binding,methylated histone binding,metal ion binding,histone acetyltransferase activity (H4-K5 specific),histone acetyltransferase activity (H4-K8 specific),histone acetyltransferase activity (H4-K16 specific)	transcription, DNA-templated,regulation of autophagy,histone acetylation,myeloid cell differentiation,histone H4-K5 acetylation,histone H4-K8 acetylation,histone H4-K16 acetylation,negative regulation of transcription, DNA-templated,positive regulation of transcription, DNA-templated
0.706966	8.85984e-18	1.68073e-16	Q5VWN6	FAM208B	Protein FAM208B	58	nucleus,nucleoplasm,cytosol	protein binding
0.705204	0.508509	0.292319	Q9Y6R4	MAP3K4	Mitogen-activated protein kinase kinase kinase 4	3	cytoplasm,perinuclear region of cytoplasm	MAP kinase kinase kinase activity,protein binding,ATP binding,metal ion binding	MAPK cascade,activation of MAPKK activity,placenta development,regulation of mitotic cell cycle,response to UV-C,regulation of gene expression,male germ-line sex determination,positive regulation of telomere maintenance via telomerase,intracellular signal transduction,regulation of apoptotic process,positive regulation of JUN kinase activity,positive regulation of telomerase activity,chorionic tr…
0.703716	0.0488341	0.0533373	Q9Y248	GINS2	DNA replication complex GINS protein PSF2	2	GINS complex,nucleoplasm,replication fork protection complex	protein binding,3'-5' DNA helicase activity	double-strand break repair via break-induced replication,DNA strand elongation involved in DNA replication,DNA duplex unwinding,mitotic DNA replication initiation
0.703629	0.322759	0.214173	Q96AT1	KIAA1143	Uncharacterized protein KIAA1143	6		protein binding
0.702686	0.00247589	0.00482899	P62277	RPS13	40S ribosomal protein S13	5	nucleus,nucleoplasm,nucleolus,cytosol,ribosome,focal adhesion,membrane,cytosolic small ribosomal subunit,extracellular matrix,extracellular exosome	RNA binding,mRNA binding,structural constituent of ribosome,protein binding,mRNA 5'-UTR binding,small ribosomal subunit rRNA binding	nuclear-transcribed mRNA catabolic process, nonsense-mediated decay,rRNA processing,translation,translational initiation,SRP-dependent cotranslational protein targeting to membrane,viral transcription,negative regulation of RNA splicing
0.70213	0.252889	0.180949	P23458	JAK1	Tyrosine-protein kinase JAK1	2	nucleus,cytoplasm,endosome,cytosol,cytoskeleton,focal adhesion,extrinsic component of cytoplasmic side of plasma membrane	protein tyrosine kinase activity,non-membrane spanning protein tyrosine kinase activity,Ras guanyl-nucleotide exchange factor activity,receptor binding,growth hormone receptor binding,protein binding,ATP binding,protein phosphatase binding,ubiquitin protein ligase binding,CCR5 chemokine receptor binding,metal ion binding	MAPK cascade,protein phosphorylation,transmembrane receptor protein tyrosine kinase signaling pathway,cell migration,cell differentiation,intracellular signal transduction,interleukin-12-mediated signaling pathway,interleukin-15-mediated signaling pathway,peptidyl-tyrosine autophosphorylation,interleukin-2-mediated signaling pathway,interleukin-7-mediated signaling pathway,interleukin-9-mediated …
0.700391	0.813682	0.395732	P52434	POLR2H	DNA-directed RNA polymerases I, II, and III subunit RPABC3	7	nucleus,nucleoplasm,DNA-directed RNA polymerase II, core complex,DNA-directed RNA polymerase III complex,DNA-directed RNA polymerase I complex,cytosol,protein-DNA complex	single-stranded DNA binding,RNA polymerase I activity,RNA polymerase II activity,RNA polymerase III activity	mRNA splicing, via spliceosome,transcription-coupled nucleotide-excision repair,transcription, DNA-templated,transcription initiation from RNA polymerase I promoter,transcription elongation from RNA polymerase I promoter,termination of RNA polymerase I transcription,transcription from RNA polymerase II promoter,transcription initiation from RNA polymerase II promoter,transcription elongation from…
0.699264	0.00339329	0.0062972	Q96F44	TRIM11	E3 ubiquitin-protein ligase TRIM11	7	nucleus,cytoplasm,cytosol	protein binding,transcription factor binding,zinc ion binding,protein domain specific binding,ubiquitin protein ligase activity	protein ubiquitination,negative regulation of viral transcription,innate immune response,negative regulation of transcription, DNA-templated,negative regulation of viral entry into host cell,positive regulation of viral entry into host cell,negative regulation of neurogenesis,defense response to virus,negative regulation of viral release from host cell
0.698977	0.116964	0.102821	Q8WYH8	ING5	Inhibitor of growth protein 5	2	nucleus,nucleoplasm,MOZ/MORF histone acetyltransferase complex	protein binding,methylated histone binding,metal ion binding	DNA replication,transcription, DNA-templated,protein acetylation,negative regulation of cell proliferation,positive regulation of apoptotic process,histone H3 acetylation,positive regulation of transcription, DNA-templated,negative regulation of growth,regulation of signal transduction by p53 class mediator
0.698548	0.898685	0.421268	Q9UQN3	CHMP2B	Charged multivesicular body protein 2b	6	ESCRT III complex,intracellular,cytoplasm,cytosol,late endosome membrane,extracellular exosome,lysosome,endosome,late endosome,plasma membrane	protein binding,protein domain specific binding,cadherin binding	cell separation after cytokinesis,autophagy,nucleus organization,endosome organization,mitotic metaphase plate congression,regulation of centrosome duplication,protein transport,endosomal transport,macroautophagy,viral life cycle,multivesicular body assembly,viral budding via host ESCRT complex,cognition,multivesicular body-lysosome fusion,neuron cellular homeostasis,regulation of mitotic spindle…
0.698139	0.000516951	0.0012591	Q8IY18	SMC5	Structural maintenance of chromosomes protein 5	11	chromosome, telomeric region,sex chromosome,nucleus,nucleoplasm,PML body,nuclear speck,cell junction,Smc5-Smc6 complex,interchromatin granule,site of double-strand break	protein binding,ATP binding	telomere maintenance via recombination,double-strand break repair via homologous recombination,cellular response to DNA damage stimulus,sister chromatid cohesion,positive regulation of maintenance of mitotic sister chromatid cohesion,cell division,positive regulation of chromosome segregation,cellular senescence,double-strand break repair via nonhomologous end joining
0.697793	0.737086	0.372373	P32121	ARRB2	Beta-arrestin-2	3	nucleus,cytoplasm,cytosol,plasma membrane,clathrin-coated pit,postsynaptic density,basolateral plasma membrane,endocytic vesicle,cytoplasmic vesicle,dendritic spine,intracellular membrane-bounded organelle,postsynaptic membrane	G-protein coupled receptor binding,receptor binding,protein binding,enzyme binding,protein domain specific binding,ubiquitin protein ligase binding,alpha-1A adrenergic receptor binding,alpha-1B adrenergic receptor binding,angiotensin receptor binding,type 1 angiotensin receptor binding,D1 dopamine receptor binding,follicle-stimulating hormone receptor binding,type 2A serotonin receptor binding,pl…	negative regulation of protein phosphorylation,G-protein coupled receptor internalization,desensitization of G-protein coupled receptor protein signaling pathway by arrestin,positive regulation of receptor internalization,transcription from RNA polymerase II promoter,transforming growth factor beta receptor signaling pathway,G-protein coupled receptor signaling pathway,dopamine receptor signaling…
0.697751	0.420692	0.257709	Q14814	MEF2D	Myocyte-specific enhancer factor 2D	5	nucleus,nucleoplasm,cytoplasm,intracellular membrane-bounded organelle	RNA polymerase II regulatory region sequence-specific DNA binding,RNA polymerase II core promoter proximal region sequence-specific DNA binding,RNA polymerase II transcription factor activity, sequence-specific DNA binding,transcriptional activator activity, RNA polymerase II core promoter proximal region sequence-specific binding,transcription factor activity, sequence-specific DNA binding,prote…	osteoblast differentiation,endochondral ossification,chondrocyte differentiation,transcription from RNA polymerase II promoter,apoptotic process,nervous system development,adult heart development,muscle organ development,skeletal muscle cell differentiation,positive regulation of transcription from RNA polymerase II promoter
0.697352	7.21886e-06	2.85492e-05	P22626	HNRNPA2B1	Heterogeneous nuclear ribonucleoproteins A2/B1	33	chromosome, telomeric region,nucleus,nucleoplasm,spliceosomal complex,cytoplasm,Cajal body,membrane,nuclear matrix,intracellular ribonucleoprotein complex,extracellular exosome,catalytic step 2 spliceosome	RNA binding,mRNA 3'-UTR binding,protein binding,miRNA binding,single-stranded telomeric DNA binding,pre-mRNA intronic binding,G-rich strand telomeric DNA binding,N6-methyladenosine-containing RNA binding	negative regulation of transcription from RNA polymerase II promoter,mRNA splicing, via spliceosome,mRNA processing,mRNA export from nucleus,RNA metabolic process,primary miRNA processing,interleukin-12-mediated signaling pathway,G-quadruplex DNA unwinding,negative regulation of mRNA splicing, via spliceosome,RNA transport,positive regulation of telomere maintenance via telomere lengthening,Requi…
0.696881	0.39261	0.245623	Q99666	RGPD5	RANBP2-like and GRIP domain-containing protein 5/6	4	cytoplasm		intracellular transport
0.695407	0.0859934	0.0815987	O14647	CHD2	Chromodomain-helicase-DNA-binding protein 2	7	nucleus,nucleoplasm,nucleolus,intracellular membrane-bounded organelle,extracellular exosome	core promoter sequence-specific DNA binding,DNA binding,RNA binding,ATP-dependent DNA helicase activity,protein binding,ATP binding,histone binding	transcription, DNA-templated,regulation of transcription from RNA polymerase II promoter,cellular response to DNA damage stimulus,muscle organ development,chromatin modification,DNA duplex unwinding,hematopoietic stem cell differentiation
0.694684	0.000249368	0.000662709	Q9UBS4	DNAJB11	DnaJ homolog subfamily B member 11	4	endoplasmic reticulum,endoplasmic reticulum lumen,membrane	protein binding,unfolded protein binding	protein folding,positive regulation of ATPase activity,IRE1-mediated unfolded protein response
0.693799	0.0421567	0.0477808	P26599	PTBP1	Polypyrimidine tract-binding protein 1	15	nucleoplasm,nucleolus,membrane,extracellular exosome	RNA binding,protein binding,poly-pyrimidine tract binding,pre-mRNA binding	regulation of alternative mRNA splicing, via spliceosome,mRNA splicing, via spliceosome,mRNA processing,RNA splicing,fibroblast growth factor receptor signaling pathway,RNA metabolic process,negative regulation of RNA splicing,negative regulation of mRNA splicing, via spliceosome,negative regulation of muscle cell differentiation,IRES-dependent viral translational initiation
0.693235	0.177569	0.139921	A7KAX9	ARHGAP32	Rho GTPase-activating protein 32	7	Golgi membrane,fibrillar center,nucleoplasm,endoplasmic reticulum membrane,Golgi apparatus,cytosol,cell cortex,endosome membrane,postsynaptic density,actin cytoskeleton,cell junction,dendritic spine,postsynaptic membrane	GTPase activator activity,protein binding,phosphatidylinositol binding	small GTPase mediated signal transduction,positive regulation of GTPase activity,regulation of small GTPase mediated signal transduction
0.693115	3.68103e-09	2.57415e-08	O60287	URB1	Nucleolar pre-ribosomal-associated protein 1	21	fibrillar center,nucleolus	RNA binding	biological_process
0.692815	0.000212973	0.000576493	Q9BZH6	WDR11	WD repeat-containing protein 11	17	nucleus,cytoplasm,lysosomal membrane,cytosol,microtubule cytoskeleton,membrane,integral component of membrane	protein binding
0.691224	9.47654e-05	0.000281441	Q9NY61	AATF	Protein AATF	16	nucleus,nucleolus,cytoplasm,Golgi apparatus	transcription factor activity, sequence-specific DNA binding,RNA binding,protein binding,leucine zipper domain binding,tau protein binding	cellular response to DNA damage stimulus,cell adhesion,regulation of mitotic cell cycle,negative regulation of superoxide anion generation,embryonic cleavage,ribosome biogenesis,negative regulation of amyloid precursor protein biosynthetic process,negative regulation of apoptotic process,positive regulation of transcription from RNA polymerase II promoter,negative regulation of reactive oxygen sp…
0.689193	0.0001424	0.000403562	P06737	PYGL	Glycogen phosphorylase, liver form	9	extracellular region,cytoplasm,cytosol,secretory granule lumen,extracellular exosome,ficolin-1-rich granule lumen	purine nucleobase binding,protein binding,ATP binding,glucose binding,drug binding,glycogen phosphorylase activity,AMP binding,vitamin binding,pyridoxal phosphate binding,bile acid binding,protein homodimerization activity,Requires Ontology	glycogen metabolic process,glycogen catabolic process,5-phosphoribose 1-diphosphate biosynthetic process,glucose homeostasis,neutrophil degranulation,necroptotic process
0.688909	0.0451824	0.0503144	Q14693	LPIN1	Phosphatidate phosphatase LPIN1	2	nucleus,nuclear envelope,nucleoplasm,cytoplasm,mitochondrial outer membrane,endoplasmic reticulum membrane,cytosol,nuclear membrane	molecular_function,transcription coactivator activity,phosphatidate phosphatase activity	transcription, DNA-templated,triglyceride mobilization,phosphatidylethanolamine biosynthetic process,phosphatidylcholine biosynthetic process,mitotic nuclear envelope disassembly,fatty acid catabolic process,dephosphorylation,triglyceride biosynthetic process,animal organ regeneration,cellular response to insulin stimulus,positive regulation of transcription from RNA polymerase II promoter
0.688756	0.00852085	0.0133675	P53680	AP2S1	AP-2 complex subunit sigma	6	cytosol,plasma membrane,AP-2 adaptor complex,endocytic vesicle membrane,clathrin-coated endocytic vesicle membrane,endolysosome membrane,clathrin-coated endocytic vesicle	transporter activity,protein binding,protein transporter activity,clathrin adaptor activity	intracellular protein transport,microtubule-based movement,antigen processing and presentation of exogenous peptide antigen via MHC class II,regulation of endocytosis,low-density lipoprotein particle receptor catabolic process,low-density lipoprotein particle clearance,ephrin receptor signaling pathway,clathrin coat assembly,regulation of defense response to virus by virus,Wnt signaling pathway, …
0.688632	0.412904	0.254341	P82970	HMGN5	High mobility group nucleosome-binding domain-containing protein 5	1	chromatin,nucleus	chromatin binding,RNA binding,nucleosomal DNA binding	transcription, DNA-templated,regulation of transcription, DNA-templated,regulation of transcription from RNA polymerase II promoter,positive regulation of cell proliferation,positive regulation of gene expression,chromatin modification,negative regulation of apoptotic process,positive regulation of transcription, DNA-templated,negative regulation of cell cycle arrest
0.688524	0.00604833	0.0101167	P27448	MARK3	MAP/microtubule affinity-regulating kinase 3	8	cytosol,plasma membrane,extracellular exosome	protein serine/threonine kinase activity,protein binding,ATP binding	MAPK cascade,microtubule cytoskeleton organization,establishment of cell polarity,negative regulation of hippo signaling
0.688031	0.0637663	0.0650487	P56556	NDUFA6	NADH dehydrogenase [ubiquinone] 1 alpha subcomplex subunit 6	1	mitochondrial inner membrane,mitochondrial respiratory chain complex I,mitochondrial membrane	NADH dehydrogenase (ubiquinone) activity	mitochondrial electron transport, NADH to ubiquinone,response to oxidative stress,mitochondrial respiratory chain complex I assembly
0.687427	0.0626985	0.0642671	Q14790	CASP8	Caspase-8	2	nucleoplasm,mitochondrion,mitochondrial outer membrane,cytosol,cytoskeleton,death-inducing signaling complex,CD95 death-inducing signaling complex,neuron projection,cell body,membrane raft,ripoptosome	cysteine-type endopeptidase activity,death receptor binding,tumor necrosis factor receptor binding,protein binding,peptidase activity,cysteine-type peptidase activity,ubiquitin protein ligase binding,protein complex binding,death effector domain binding,identical protein binding,scaffold protein binding,cysteine-type endopeptidase activity involved in apoptotic process,cysteine-type endopeptidase…	proteolysis,apoptotic process,activation of cysteine-type endopeptidase activity involved in apoptotic process,cell surface receptor signaling pathway,response to cold,regulation of tumor necrosis factor-mediated signaling pathway,natural killer cell activation,macrophage differentiation,response to cobalt ion,response to estradiol,response to lipopolysaccharide,toll-like receptor 3 signaling pat…
0.68742	0.0478494	0.0524829	Q13126	MTAP	S-methyl-5'-thioadenosine phosphorylase	1	nucleus,cytosol,extracellular exosome	phosphorylase activity,protein binding,S-methyl-5-thioadenosine phosphorylase activity	nucleobase-containing compound metabolic process,purine ribonucleoside salvage,L-methionine biosynthetic process from methylthioadenosine,interleukin-12-mediated signaling pathway,nicotinamide riboside catabolic process
0.686474	0.00133735	0.00285583	P62249	RPS16	40S ribosomal protein S16	10	nucleoplasm,cytosol,focal adhesion,small ribosomal subunit,membrane,cytosolic small ribosomal subunit,extracellular matrix,extracellular exosome	RNA binding,structural constituent of ribosome,protein binding	nuclear-transcribed mRNA catabolic process, nonsense-mediated decay,maturation of SSU-rRNA from tricistronic rRNA transcript (SSU-rRNA, 5.8S rRNA, LSU-rRNA),rRNA processing,translation,translational initiation,SRP-dependent cotranslational protein targeting to membrane,viral transcription,ribosomal small subunit biogenesis,liver regeneration,cellular response to leukemia inhibitory factor
0.68638	0.0151724	0.0214214	O00472	ELL2	RNA polymerase II elongation factor ELL2	1	nucleoplasm,transcription elongation factor complex	protein binding	regulation of transcription, DNA-templated,transcription elongation from RNA polymerase II promoter,snRNA transcription from RNA polymerase II promoter
0.686168	0.000212779	0.00057619	Q96T88	UHRF1	E3 ubiquitin-protein ligase UHRF1	18	nuclear chromatin,euchromatin,heterochromatin,nucleus,replication fork,nuclear heterochromatin,nuclear matrix	core promoter proximal region sequence-specific DNA binding,transcription factor activity, sequence-specific DNA binding,ubiquitin-protein transferase activity,protein binding,zinc ion binding,methyl-CpG binding,nucleosomal histone binding,methylated histone binding,histone binding,identical protein binding,hemi-methylated DNA-binding,ubiquitin protein ligase activity	negative regulation of transcription from RNA polymerase II promoter,DNA repair,transcription, DNA-templated,cell cycle,cell proliferation,maintenance of DNA methylation,histone monoubiquitination,histone ubiquitination,positive regulation of cellular protein metabolic process,protein ubiquitination involved in ubiquitin-dependent protein catabolic process,positive regulation of transcription fro…
0.685039	1.49463e-05	5.42375e-05	P86790;P86791	CCZ1B;CCZ1	Vacuolar fusion protein CCZ1 homolog B;Vacuolar fusion protein CCZ1 homolog	12	lysosomal membrane,cytosol,aggresome,vesicle,intracellular membrane-bounded organelle;lysosomal membrane,cytosol,aggresome,vesicle,Mon1-Ccz1 complex,intracellular membrane-bounded organelle	;guanyl-nucleotide exchange factor activity,protein binding	vesicle-mediated transport;vesicle-mediated transport,regulation of molecular function
0.684706	0.163125	0.13185	Q9Y463	DYRK1B	Dual specificity tyrosine-phosphorylation-regulated kinase 1B	1	nucleus	transcription coactivator activity,protein kinase activity,protein serine/threonine kinase activity,protein serine/threonine/tyrosine kinase activity,protein tyrosine kinase activity,protein binding,ATP binding	protein phosphorylation,myoblast fusion,peptidyl-tyrosine phosphorylation,positive regulation of transcription, DNA-templated,adipose tissue development
0.684658	0.0946627	0.0876971	Q12834	CDC20	Cell division cycle protein 20 homolog	7	spindle pole,nucleus,nucleoplasm,centrosome,spindle,cytosol,protein complex,perinuclear region of cytoplasm,anaphase-promoting complex	protein binding,protein C-terminus binding,anaphase-promoting complex binding,enzyme binding,histone deacetylase binding,ubiquitin-protein transferase activator activity	cell cycle,sister chromatid cohesion,mitotic sister chromatid cohesion,positive regulation of cell proliferation,protein deubiquitination,anaphase-promoting complex-dependent catabolic process,positive regulation of synaptic plasticity,regulation of meiotic nuclear division,protein ubiquitination involved in ubiquitin-dependent protein catabolic process,proteasome-mediated ubiquitin-dependent pro…
0.68446	0.0368301	0.0429756	Q14137	BOP1	Ribosome biogenesis protein BOP1	20	nucleus,nucleoplasm,nucleolus,intracellular ribonucleoprotein complex,preribosome, large subunit precursor,PeBoW complex	RNA binding,protein binding,ribonucleoprotein complex binding	ribosomal large subunit assembly,cleavage in ITS2 between 5.8S rRNA and LSU-rRNA of tricistronic rRNA transcript (SSU-rRNA, 5.8S rRNA, LSU-rRNA),maturation of LSU-rRNA from tricistronic rRNA transcript (SSU-rRNA, 5.8S rRNA, LSU-rRNA),rRNA processing,cell proliferation,ribosome biogenesis,regulation of cell cycle,regulation of signal transduction by p53 class mediator
0.683396	0.433223	0.262927	Q9UBW8	COPS7A	COP9 signalosome complex subunit 7a	4	nucleoplasm,cytosol,COP9 signalosome	protein binding	protein deneddylation,nucleotide-excision repair, DNA damage recognition,transcription-coupled nucleotide-excision repair,post-translational protein modification
0.682375	0.296364	0.201843	Q7Z6I8	C5orf24	UPF0461 protein C5orf24	5		protein binding
0.682097	0.0674578	0.0678975	Q13129	RLF	Zinc finger protein Rlf	5	nucleus	DNA binding,protein binding,zinc ion binding	transcription, DNA-templated,regulation of transcription, DNA-templated,DNA integration,regulation of DNA methylation,positive regulation of transcription, DNA-templated,positive regulation of transcription from RNA polymerase II promoter,chromosome organization,histone H3-K4 monomethylation
0.682052	0.00459921	0.00807688	Q92845	KIFAP3	Kinesin-associated protein 3	2	condensed nuclear chromosome,endoplasmic reticulum,Golgi apparatus,centrosome,cytosol,cilium,axoneme,microtubule cytoskeleton,kinesin II complex,intraciliary transport particle,photoreceptor connecting cilium,ciliary basal body,extracellular exosome,ciliary tip,periciliary membrane compartment,spindle microtubule	protein binding,kinesin binding	protein complex assembly,retrograde vesicle-mediated transport, Golgi to ER,microtubule-based process,microtubule-based movement,signal transduction,negative regulation of cell proliferation,antigen processing and presentation of exogenous peptide antigen via MHC class II,intraciliary transport involved in cilium morphogenesis,negative regulation of apoptotic process,positive regulation of calciu…
0.681685	0.0134764	0.0194184	Q9NQ55	PPAN	Suppressor of SWI4 1 homolog	9	nucleus,nucleolus,preribosome, large subunit precursor	RNA binding,rRNA binding	ribosomal large subunit assembly
0.680761	0.0104241	0.0157838	Q9NR11	ZNF302	Zinc finger protein 302	2	nucleus	DNA binding,transcription factor activity, sequence-specific DNA binding,protein binding,metal ion binding	transcription, DNA-templated,regulation of transcription, DNA-templated
0.680646	0.0389938	0.0449756	Q9P1Y6	PHRF1	PHD and RING finger domain-containing protein 1	6	membrane	protein domain specific binding,metal ion binding,RNA polymerase binding	transcription from RNA polymerase II promoter,mRNA processing
0.679682	0.0177072	0.0242138	Q8IWA0	WDR75	WD repeat-containing protein 75	19	nucleoplasm,nucleolus	RNA binding	transcription, DNA-templated,rRNA processing,positive regulation of transcription from RNA polymerase I promoter,regulation of mitophagy,positive regulation of protein targeting to mitochondrion,positive regulation of rRNA processing
0.679132	0.0121242	0.0178073	P49736	MCM2	DNA replication licensing factor MCM2	3	nuclear chromosome, telomeric region,chromatin,nucleus,nucleoplasm,nuclear origin of replication recognition complex,cytoplasm,microtubule cytoskeleton,MCM complex,nucleolus	DNA binding,DNA helicase activity,DNA replication origin binding,protein binding,ATP binding,enzyme binding,histone binding,metal ion binding	G1/S transition of mitotic cell cycle,DNA replication,DNA unwinding involved in DNA replication,DNA replication initiation,nucleosome assembly,apoptotic process,cellular response to interleukin-4,cochlea development
0.678391	0.210599	0.158277	Q9BRU9	UTP23	rRNA-processing protein UTP23 homolog	1	nucleolus,small-subunit processome	RNA binding,mRNA 3'-UTR binding,protein binding,mRNA 5'-UTR binding,small ribosomal subunit rRNA binding	maturation of SSU-rRNA from tricistronic rRNA transcript (SSU-rRNA, 5.8S rRNA, LSU-rRNA),endonucleolytic cleavage in 5'-ETS of tricistronic rRNA transcript (SSU-rRNA, 5.8S rRNA, LSU-rRNA)
0.678007	0.0936877	0.0869319	Q9P253	VPS18	Vacuolar protein sorting-associated protein 18 homolog	5	lysosome,lysosomal membrane,early endosome,late endosome,autophagosome,actin filament,AP-3 adaptor complex,clathrin-coated vesicle,HOPS complex,late endosome membrane,CORVET complex	actin binding,protein binding,syntaxin binding,protein binding, bridging,metal ion binding	intracellular protein transport,vesicle docking involved in exocytosis,autophagy,endosome organization,lysosome organization,endosome to lysosome transport,regulation of SNARE complex assembly,viral entry into host cell
0.677725	0.192841	0.14865	P15336	ATF2	Cyclic AMP-dependent transcription factor ATF-2	3	nucleus,nucleoplasm,cytoplasm,mitochondrial outer membrane,site of double-strand break	RNA polymerase II regulatory region sequence-specific DNA binding,RNA polymerase II distal enhancer sequence-specific DNA binding,transcription factor activity, RNA polymerase II transcription factor binding,transcriptional activator activity, RNA polymerase II core promoter proximal region sequence-specific binding,RNA polymerase II activating transcription factor binding,enhancer sequence-speci…	negative regulation of transcription from RNA polymerase II promoter,outflow tract morphogenesis,regulation of transcription, DNA-templated,regulation of transcription from RNA polymerase II promoter,transcription from RNA polymerase II promoter,response to osmotic stress,cellular response to DNA damage stimulus,response to water deprivation,positive regulation of gene expression,negative regulat…
0.676723	3.7244e-06	1.58005e-05	O75147	OBSL1	Obscurin-like protein 1	6	cytoplasm,Golgi apparatus,centrosome,cytosol,muscle myosin complex,intercalated disc,Z disc,M band,perinuclear region of cytoplasm,3M complex	protein binding,cytoskeletal adaptor activity,structural constituent of muscle,actin filament binding,muscle alpha-actinin binding,structural molecule activity conferring elasticity	microtubule cytoskeleton organization,striated muscle contraction,cytoskeleton organization,actin filament organization,Golgi organization,regulation of mitotic nuclear division,protein localization to Golgi apparatus,post-translational protein modification,sarcomere organization,positive regulation of dendrite morphogenesis,cardiac myofibril assembly,striated muscle myosin thick filament assembly
0.675433	0.129677	0.111188	Q9UBZ9	REV1	DNA repair protein REV1	5	nucleoplasm	damaged DNA binding,protein binding,deoxycytidyl transferase activity,metal ion binding	DNA replication,response to UV,translesion synthesis,error-prone translesion synthesis
0.674716	0.287539	0.19766	Q9Y4B4	RAD54L2	Helicase ARIP4	7	nucleus	DNA binding,helicase activity,protein binding,ATP binding
0.674648	0.000229323	0.000614571	P62491;Q15907	RAB11A;RAB11B	Ras-related protein Rab-11A;Ras-related protein Rab-11B	4	spindle pole,mitochondrion,multivesicular body,Golgi apparatus,trans-Golgi network,microtubule organizing center,cytosol,plasma membrane,transport vesicle,axon,cytoplasmic vesicle membrane,cytoplasmic vesicle,vesicle,cleavage furrow,intracellular membrane-bounded organelle,protein complex,phagocytic vesicle,perinuclear region of cytoplasm,recycling endosome,recycling endosome membrane,extracellul…	GTPase activity,protein binding,GTP binding,microtubule binding,syntaxin binding,myosin V binding;GTPase activity,protein binding,GTP binding,GDP binding,myosin V binding,cadherin binding	cytokinesis,renal water homeostasis,mitotic metaphase plate congression,positive regulation of epithelial cell migration,regulation of multivesicular body size,positive regulation of G2/M transition of mitotic cell cycle,vesicle-mediated transport,astral microtubule organization,neuron projection development,melanosome transport,multivesicular body assembly,post-translational protein modification…
0.674431	6.13724e-06	2.47327e-05	Q14527	HLTF	Helicase-like transcription factor	21	nucleus,nucleoplasm,nucleolus,cytoplasm,membrane	RNA polymerase II core promoter proximal region sequence-specific DNA binding,transcriptional activator activity, RNA polymerase II core promoter proximal region sequence-specific binding,DNA binding,RNA binding,helicase activity,protein binding,ATP binding,zinc ion binding,ATPase activity,ubiquitin protein ligase binding,ubiquitin protein ligase activity	regulation of transcription, DNA-templated,transcription from RNA polymerase II promoter,protein ubiquitination,chromatin modification,positive regulation of transcription from RNA polymerase II promoter
0.673027	0.000785118	0.00180724	Q9NRR4	DROSHA	Ribonuclease 3	16	nucleoplasm,nucleolus,postsynaptic density,microprocessor complex	lipopolysaccharide binding,RNA binding,double-stranded RNA binding,ribonuclease III activity,protein binding,DEAD/H-box RNA helicase binding,protein homodimerization activity,SMAD binding,metal ion binding,R-SMAD binding,primary miRNA binding	miRNA metabolic process,positive regulation of gene expression,rRNA catabolic process,production of siRNA involved in RNA interference,primary miRNA processing,pre-miRNA processing,ribosome biogenesis,regulation of regulatory T cell differentiation,regulation of inflammatory response,defense response to Gram-negative bacterium,defense response to Gram-positive bacterium,RNA phosphodiester bond hy…
0.672505	0.638582	0.339182	P13693	TPT1	Translationally-controlled tumor protein	1	extracellular space,nucleus,cytoplasm,multivesicular body,cytosol,extracellular exosome,tubulin complex	RNA binding,calcium ion binding,protein binding,microtubule binding	calcium ion transport,cellular calcium ion homeostasis,response to virus,cell differentiation,regulation of apoptotic process,negative regulation of apoptotic process,negative regulation of intrinsic apoptotic signaling pathway in response to DNA damage
0.671678	0.00723163	0.0117294	P51812	RPS6KA3	Ribosomal protein S6 kinase alpha-3	16	nucleus,nucleoplasm,cytoplasm,cytosol	magnesium ion binding,protein kinase activity,protein serine/threonine kinase activity,protein binding,ATP binding,kinase activity,protein kinase binding,cysteine-type endopeptidase inhibitor activity involved in apoptotic process	skeletal system development,toll-like receptor signaling pathway,apoptotic process,cell cycle,signal transduction,central nervous system development,peptidyl-serine phosphorylation,positive regulation of cell growth,response to lipopolysaccharide,intracellular signal transduction,negative regulation of apoptotic process,negative regulation of cysteine-type endopeptidase activity involved in apopt…
0.671111	0.000109707	0.000319181	Q5QJE6	DNTTIP2	Deoxynucleotidyltransferase terminal-interacting protein 2	21	nucleus,nucleolus	RNA binding	transcription, DNA-templated,regulation of transcription, DNA-templated
0.670545	1.21013e-09	9.15774e-09	Q9HAW4	CLSPN	Claspin	34	nucleoplasm,Golgi apparatus	DNA binding,protein binding,anaphase-promoting complex binding	DNA damage checkpoint,DNA replication,DNA repair,mitotic G2 DNA damage checkpoint,protein deubiquitination,peptidyl-serine phosphorylation,activation of protein kinase activity,mitotic DNA replication checkpoint,execution phase of apoptosis
0.6687	0.107712	0.0967018	Q13608	PEX6	Peroxisome assembly factor 2	4	photoreceptor outer segment,cytoplasm,peroxisome,peroxisomal membrane,cytosol,Requires Ontology	protein binding,ATP binding,protein C-terminus binding,ATPase activity,protein complex binding,ATPase activity, coupled	protein targeting to peroxisome,peroxisome organization,protein import into peroxisome matrix, translocation,protein stabilization
0.668509	0.185517	0.144355	Q14938	NFIX	Nuclear factor 1 X-type	3	nucleus	DNA binding,transcription factor activity, sequence-specific DNA binding,transcription factor activity, RNA polymerase II distal enhancer sequence-specific binding,protein binding	negative regulation of transcription from RNA polymerase II promoter,DNA replication,transcription from RNA polymerase II promoter,positive regulation of transcription from RNA polymerase II promoter
0.667356	0.0469433	0.0517811	Q8WWN8	ARAP3	Arf-GAP with Rho-GAP domain, ANK repeat and PH domain-containing protein 3	1	ruffle,cytoplasm,cytosol,cytoskeleton,plasma membrane,lamellipodium	GTPase activator activity,protein binding,phosphatidylinositol-3,4,5-trisphosphate binding,phosphatidylinositol-3,4-bisphosphate binding,metal ion binding	cytoskeleton organization,signal transduction,regulation of cell shape,vesicle-mediated transport,negative regulation of cell migration,negative regulation of Rac protein signal transduction,negative regulation of Rho protein signal transduction,positive regulation of GTPase activity,regulation of small GTPase mediated signal transduction
0.665906	4.87146e-07	2.43052e-06	Q6RFH5	WDR74	WD repeat-containing protein 74	9	nucleus,nucleolus,preribosome, large subunit precursor	molecular_function,protein binding	biological_process,ribosomal large subunit biogenesis
0.665801	1.12856e-09	8.57753e-09	P07195	LDHB	L-lactate dehydrogenase B chain	10	cytoplasm,mitochondrion,cytosol,membrane,myelin sheath,membrane raft,extracellular exosome	L-lactate dehydrogenase activity,protein binding,kinase binding,identical protein binding,NAD binding	carbohydrate metabolic process,lactate metabolic process,pyruvate metabolic process,NAD metabolic process,oxidation-reduction process
0.665152	0.00316947	0.00595925	Q7Z569	BRAP	BRCA1-associated protein	12	ubiquitin ligase complex,cytoplasm,cytosol,nuclear membrane	nucleic acid binding,ubiquitin-protein transferase activity,protein binding,nuclear localization sequence binding,zinc ion binding,identical protein binding,ubiquitin protein ligase activity	MAPK cascade,Ras protein signal transduction,negative regulation of signal transduction,protein ubiquitination
0.663198	0.000654953	0.00155045	O00566	MPHOSPH10	U3 small nucleolar ribonucleoprotein protein MPP10	13	nucleoplasm,chromosome,nucleolus,small nucleolar ribonucleoprotein complex,small-subunit processome,Mpp10 complex	RNA binding,protein binding	RNA splicing, via transesterification reactions,rRNA processing,RNA processing,RNA splicing,negative regulation of phosphatase activity,maturation of SSU-rRNA
0.662688	0.0172283	0.0236499	Q8IZ69	TRMT2A	tRNA (uracil-5-)-methyltransferase homolog A	2		RNA binding,RNA methyltransferase activity	RNA methylation,RNA processing
0.6626	0.068577	0.0687636	Q8IZD2	KMT2E	Histone-lysine N-methyltransferase 2E	11	nucleoplasm,cytoplasm,plasma membrane,nuclear speck	protein binding,histone-lysine N-methyltransferase activity,metal ion binding	neutrophil mediated immunity,DNA methylation,transcription, DNA-templated,regulation of transcription, DNA-templated,cell cycle arrest,erythrocyte differentiation,histone lysine methylation,neutrophil activation,regulation of megakaryocyte differentiation
0.662142	0.991125	0.446272	P63208	SKP1	S-phase kinase-associated protein 1	11	nucleus,nucleoplasm,cytoplasm,cytosol,SCF ubiquitin ligase complex,Cul7-RING ubiquitin ligase complex,extracellular exosome,PcG protein complex	ubiquitin-protein transferase activity,protein binding,beta-catenin binding,protein domain specific binding,cullin family protein binding,ubiquitin protein ligase activity	G2/M transition of mitotic cell cycle,protein polyubiquitination,stimulatory C-type lectin receptor signaling pathway,cellular iron ion homeostasis,SCF complex assembly,negative regulation of G2/M transition of mitotic cell cycle,Wnt signaling pathway,protein ubiquitination,SCF-dependent proteasomal ubiquitin-dependent protein catabolic process,histone H2A monoubiquitination,NIK/NF-kappaB signali…
0.66181	0.317531	0.211788	O43819	SCO2	Protein SCO2 homolog, mitochondrial	1	mitochondrion,mitochondrial inner membrane,mitochondrial matrix,myofibril	copper ion binding,protein binding	eye development,copper ion transport,cellular copper ion homeostasis,respiratory chain complex IV assembly,cell redox homeostasis,oxidation-reduction process
0.661528	0.170884	0.136378	Q99622	C12orf57	Protein C10	3	cytoplasm,nuclear speck	molecular_function	post-embryonic development,regulation of skeletal muscle contraction,corpus callosum morphogenesis,third ventricle development,psychomotor behavior,camera-type eye morphogenesis,cognition
0.66133	2.15313e-10	1.82248e-09	Q5T3J3	LRIF1	Ligand-dependent nuclear receptor-interacting factor 1	13	nucleus,microtubule organizing center,nuclear matrix,nuclear chromosome, telomeric region	protein binding,retinoic acid receptor binding	transcription, DNA-templated,regulation of transcription, DNA-templated
0.661283	8.40423e-06	3.25205e-05	Q6IEG0	SNRNP48	U11/U12 small nuclear ribonucleoprotein 48 kDa protein	9	nucleoplasm,U12-type spliceosomal complex,cytosol	metal ion binding	mRNA splicing, via spliceosome,RNA splicing
0.660753	0.180549	0.141559	Q9UH99	SUN2	SUN domain-containing protein 2	2	nuclear chromosome, telomeric region,condensed nuclear chromosome,nuclear envelope,integral component of nuclear inner membrane,endosome membrane,nuclear membrane,LINC complex	protein binding,lamin binding,microtubule binding,identical protein binding,protein anchor	nuclear envelope organization,mitotic spindle organization,nuclear migration,nucleokinesis involved in cell motility in cerebral cortex radial glia guided migration,positive regulation of cell migration,nuclear migration along microfilament,meiotic cell cycle,centrosome localization,cytoskeletal anchoring at nuclear membrane,nuclear matrix anchoring at nuclear membrane
0.660415	0.0257022	0.0324465	Q9NV06	DCAF13	DDB1- and CUL4-associated factor 13	8	nucleus,nucleoplasm,nucleolus,centrosome,cytosol,cell junction,small-subunit processome,Cul4-RING E3 ubiquitin ligase complex	RNA binding,estrogen receptor binding	maturation of SSU-rRNA from tricistronic rRNA transcript (SSU-rRNA, 5.8S rRNA, LSU-rRNA),rRNA processing,protein ubiquitination,post-translational protein modification
0.658885	0.000548774	0.00132463	Q9Y232	CDYL	Chromodomain Y-like protein	12	nucleus,chromosome,nuclear speck	chromatin binding,transcription corepressor activity,protein binding,protein binding, bridging,methylated histone binding,Requires Ontology	transcription, DNA-templated,regulation of transcription, DNA-templated,spermatogenesis,spermatid development,random inactivation of X chromosome,Requires Ontology,negative regulation of nucleic acid-templated transcription
0.658388	0.0104704	0.01583	P04844	RPN2	Dolichyl-diphosphooligosaccharide--protein glycosyltransferase subunit 2	11	autophagosome membrane,endoplasmic reticulum membrane,rough endoplasmic reticulum,oligosaccharyltransferase complex,membrane,integral component of membrane	protein binding,ribosome binding,dolichyl-diphosphooligosaccharide-protein glycotransferase activity	cellular protein modification process,protein N-linked glycosylation,aging,protein N-linked glycosylation via asparagine,response to drug
0.657601	0.12872	0.110538	Q9H490	PIGU	Phosphatidylinositol glycan anchor biosynthesis class U protein	1	endoplasmic reticulum membrane,plasma membrane,membrane,integral component of endoplasmic reticulum membrane,GPI-anchor transamidase complex	GPI-anchor transamidase activity,GPI anchor binding	GPI anchor biosynthetic process,attachment of GPI anchor to protein,regulation of JAK-STAT cascade
0.65701	4.08839e-06	1.71267e-05	Q14202	ZMYM3	Zinc finger MYM-type protein 3	20	nucleoplasm,cytoplasm	RNA polymerase II transcription factor activity, sequence-specific DNA binding,DNA binding,zinc ion binding	regulation of transcription from RNA polymerase II promoter,cytoskeleton organization,multicellular organism development,regulation of cell morphogenesis
0.656348	0.0741305	0.073035	P35520	CBS	Cystathionine beta-synthase	5	nucleus,cytoplasm,cytosol	cystathionine beta-synthase activity,protein binding,oxygen binding,enzyme binding,heme binding,pyridoxal phosphate binding,ubiquitin protein ligase binding,identical protein binding,protein homodimerization activity,metal ion binding,nitrite reductase (NO-forming) activity,carbon monoxide binding,nitric oxide binding,modified amino acid binding,S-adenosyl-L-methionine binding	cysteine biosynthetic process from serine,L-serine metabolic process,L-serine catabolic process,cysteine biosynthetic process via cystathionine,cysteine biosynthetic process,transsulfuration,L-cysteine catabolic process,DNA protection,homocysteine catabolic process,homocysteine metabolic process,oxidation-reduction process,hydrogen sulfide biosynthetic process
0.655996	0.0282011	0.0348653	O15145	ARPC3	Actin-related protein 2/3 complex subunit 3	4	cytosol,Arp2/3 protein complex,focal adhesion,actin cytoskeleton,membrane,lamellipodium,filamentous actin,Requires Ontology,extracellular exosome	structural constituent of cytoskeleton,protein binding,actin filament binding	movement of cell or subcellular component,Arp2/3 complex-mediated actin nucleation,Fc-gamma receptor signaling pathway involved in phagocytosis,ephrin receptor signaling pathway,membrane organization,cellular response to nerve growth factor stimulus
0.65587	0.29874	0.202946	P26368	U2AF2	Splicing factor U2AF 65 kDa subunit	14	commitment complex,nucleus,nucleoplasm,spliceosomal complex,nuclear speck,U2-type prespliceosome,U2AF,Prp19 complex	RNA binding,protein binding,poly-pyrimidine tract binding,enzyme binding,pre-mRNA 3'-splice site binding,C2H2 zinc finger domain binding	mRNA splicing, via spliceosome,termination of RNA polymerase II transcription,mRNA processing,RNA export from nucleus,mRNA export from nucleus,mRNA 3'-end processing,negative regulation of protein ubiquitination,positive regulation of RNA splicing,negative regulation of mRNA splicing, via spliceosome,regulation of mitophagy,positive regulation of protein targeting to mitochondrion
0.655813	0.170239	0.135958	Q9HCU9	BRMS1	Breast cancer metastasis-suppressor 1	2	nucleus,nucleoplasm,cytoplasm,Sin3-type complex	histone deacetylase activity,protein binding,histone deacetylase binding,NF-kappaB binding	negative regulation of transcription from RNA polymerase II promoter,transcription, DNA-templated,apoptotic process,histone deacetylation,negative regulation of NF-kappaB transcription factor activity,regulation of apoptotic process,negative regulation of transcription, DNA-templated,positive regulation of protein deacetylation,positive regulation of anoikis
0.655687	0.0567428	0.0597473	P19623	SRM	Spermidine synthase	4	cytosol	spermidine synthase activity,protein binding,identical protein binding,protein homodimerization activity	polyamine metabolic process,spermidine biosynthetic process,cellular response to leukemia inhibitory factor
0.654567	5.52234e-06	2.24736e-05	P34896	SHMT1	Serine hydroxymethyltransferase, cytosolic	6	nucleus,mitochondrion,cytosol,extracellular exosome	translation repressor activity, nucleic acid binding,glycine hydroxymethyltransferase activity,protein binding,L-allo-threonine aldolase activity,pyridoxal phosphate binding,identical protein binding,protein homodimerization activity,mRNA 5'-UTR binding,serine binding	dTMP biosynthetic process,glycine metabolic process,L-serine metabolic process,L-serine catabolic process,purine nucleobase biosynthetic process,negative regulation of translation,glycine biosynthetic process from serine,tetrahydrofolate interconversion,carnitine biosynthetic process,tetrahydrofolate metabolic process,folic acid metabolic process,protein tetramerization,protein homotetramerizatio…
0.654401	0.980019	0.443447	Q13485	SMAD4	Mothers against decapentaplegic homolog 4	1	nuclear chromatin,nucleus,nucleoplasm,transcription factor complex,cytoplasm,centrosome,cytosol,activin responsive factor complex,SMAD protein complex	RNA polymerase II core promoter proximal region sequence-specific DNA binding,core promoter proximal region sequence-specific DNA binding,transcription factor activity, RNA polymerase II transcription factor binding,transcriptional activator activity, RNA polymerase II core promoter proximal region sequence-specific binding,RNA polymerase II transcription factor binding,chromatin binding,protein …	negative regulation of transcription from RNA polymerase II promoter,ovarian follicle development,branching involved in ureteric bud morphogenesis,response to hypoxia,in utero embryonic development,gastrulation with mouth forming second,outflow tract septum morphogenesis,atrioventricular valve formation,epithelial to mesenchymal transition involved in endocardial cushion formation,left ventricula…
0.653032	5.27801e-06	2.15429e-05	Q14679	TTLL4	Tubulin polyglutamylase TTLL4	5	cytosol,microtubule,cilium	ATP binding,tubulin binding,protein-glutamic acid ligase activity,tubulin-glutamic acid ligase activity	protein polyglutamylation,peptidyl-glutamic acid modification
0.652028	0.0558994	0.0590724	Q06546	GABPA	GA-binding protein alpha chain	4	nuclear chromatin,nucleus,nucleoplasm	RNA polymerase II core promoter proximal region sequence-specific DNA binding,transcriptional activator activity, RNA polymerase II core promoter proximal region sequence-specific binding,transcriptional activator activity, RNA polymerase II transcription regulatory region sequence-specific binding,DNA binding,chromatin binding,transcription factor activity, sequence-specific DNA binding,transcri…	negative regulation of transcription from RNA polymerase II promoter,in utero embryonic development,transcription from RNA polymerase II promoter,mitochondrion organization,positive regulation of gene expression,cell differentiation,negative regulation of megakaryocyte differentiation,positive regulation of transcription from RNA polymerase II promoter,cellular response to dopamine
0.649435	1.49205e-12	1.66577e-11	Q9NNW5	WDR6	WD repeat-containing protein 6	24	cytoplasm,cytosol,plasma membrane,COP9 signalosome	RNA binding,protein binding	cell cycle arrest,negative regulation of cell proliferation,negative regulation of autophagy
0.649102	0.00912847	0.014112	Q8NB78	KDM1B	Lysine-specific histone demethylase 1B	13	nucleosome,nucleus,nucleoplasm	DNA binding,protein binding,zinc ion binding,histone demethylase activity,histone demethylase activity (H3-dimethyl-K4 specific),histone demethylase activity (H3-monomethyl-K4 specific),histone binding,FAD binding	regulation of gene expression by genetic imprinting,transcription, DNA-templated,regulation of transcription, DNA-templated,multicellular organism development,protein deubiquitination,histone H3-K4 demethylation,DNA methylation involved in gamete generation,regulation of DNA methylation,oxidation-reduction process
0.648848	0.0330168	0.0394803	P51957	NEK4	Serine/threonine-protein kinase Nek4	5	cytoplasm,cytosol,ciliary rootlet,ciliary transition zone,ciliary basal body,ciliary plasm	protein serine/threonine kinase activity,ATP binding,manganese ion binding	mitotic cell cycle,protein phosphorylation,cellular response to DNA damage stimulus,regulation of mitotic cell cycle,signal transduction by protein phosphorylation,stress-activated protein kinase signaling cascade,activation of protein kinase activity,regulation of apoptotic process,positive regulation of transcription, DNA-templated,cell division,regulation of replicative cell aging,regulation o…
0.647727	2.52475e-12	2.73157e-11	P10244	MYBL2	Myb-related protein B	27	nucleus,nucleoplasm,Myb complex	RNA polymerase II core promoter proximal region sequence-specific DNA binding,transcriptional activator activity, RNA polymerase II core promoter proximal region sequence-specific binding,transcription factor activity, RNA polymerase II transcription factor recruiting,transcription factor activity, sequence-specific DNA binding,protein binding	regulation of transcription from RNA polymerase II promoter,transcription from RNA polymerase II promoter,cell differentiation,positive regulation of neuron apoptotic process,positive regulation of transcription from RNA polymerase II promoter,regulation of cell cycle,mitotic spindle assembly,cellular response to leukemia inhibitory factor
0.645304	0.0897125	0.0842258	Q8WY54	PPM1E	Protein phosphatase 1E	1	nucleus,nucleolus,mitochondrion,protein complex	protein serine/threonine phosphatase activity,protein binding,metal ion binding	negative regulation of protein kinase activity,cellular response to drug,peptidyl-threonine dephosphorylation,positive regulation of stress fiber assembly
[truncated: 4,375 more rows]

## Sheet: 2_Overlap_with_ubiquitylation
# Overlap between candidate proteasome substrates identified by ProteasomeID and proteins that show increased ubiquitylation upon MG132 treatment, as identified in PMID: 35585066
[truncated: 142 more rows]

## Sheet: 3_PSMA4-mTurboID_MG132_PROTAC
# Output candidates table from Spectronaut for comparison of PSMA4-miniTurboID_MG132_PROTAC_treated vs. PSMA4-miniTurboID_DMSO_DMSO_treated cell lines.
[truncated: 14,995 more rows]
